# Supplementary material for: Endophytic Bacillus altitudinis Strain Uses Different Novelty Molecular Pathways to Enhance Plant Growth
Source: Front Microbiol. 2021 Jun 25;12:692313. doi: 10.3389/fmicb.2021.692313 (PMC8268155; doi:10.3389/fmicb.2021.692313)
Supplement: Supplementary file 7 [file Table_7.XLSX]

## Sheet: Sheet1
id	baseMean	baseMean_B001	baseMean_SB001	foldChange(SB001/B001)	log2FoldChange	pval	padj	Chromosome	Start Site	End Site	Direction	Length	Name	GO	KEGG	eggNOG	eggNOG Class	Swissprot	NR
gene2967	367.294	18.4231	716.165	38.8731	5.2807	0.356922	1	gi|111111114|ref|scaffold4.1|	289426	290859	-	1433	gene2967	GO:0006810;GO:0051234;GO:0044763;GO:0044699;GO:0009987;GO:0051179;GO:0055085;GO:0044765;GO:0005215;GO:0016020;GO:0031224;GO:0016021;GO:0044425;GO:0044464;GO:0005623;GO:0071944;GO:0005886	-	ENOG4105C0R	P	sp|P94422|YCNB_BACSU|Uncharacterized MFS-type transporter YcnB OS=Bacillus subtilis (strain 168) OX=224308 GN=ycnB PE=3 SV=1	MFS transporter [Bacillus pumilus]
gene3573	390.786	65.4067	716.165	10.9494	3.45278	0.376342	1	gi|111111117|ref|scaffold7.1|	90273	92189	+	1916	gene3573	GO:0009987;GO:1901360;GO:0046483;GO:0006807;GO:0008152;GO:0034641;GO:0006139;GO:0006725;GO:0071704;GO:0044238;GO:0044237;GO:0046434;GO:0009166;GO:0009167;GO:0009164;GO:0044281;GO:0009161;GO:0046130;GO:0009169;GO:0044710;GO:0009199;GO:0042454;GO:0009207;GO:0009205;GO:0009203;GO:0046034;GO:0046128;GO:1901564;GO:1901565;GO:0009128;GO:0006163;GO:0019637;GO:0009141;GO:0009143;GO:0009144;GO:0009146;GO:…	K02470	ENOG4105C7D	L	sp|P05652|GYRB_BACSU|DNA gyrase subunit B OS=Bacillus subtilis (strain 168) OX=224308 GN=gyrB PE=3 SV=1	DNA gyrase subunit B [Streptococcus pneumoniae]
gene2803	349.734	222.024	477.443	2.15041	1.10461	0.485976	1	gi|111111114|ref|scaffold4.1|	81786	84365	-	2579	gene2803	GO:0005975;GO:0008152;GO:0071704;GO:0044238;GO:0044723;GO:0006013;GO:0019318;GO:0005996;GO:0015923;GO:0016798;GO:0016787;GO:0003824;GO:0004553;GO:0004559;GO:0005488;GO:0030246;GO:0008270;GO:0043169;GO:0046914;GO:0043167;GO:0046872	K15524	ENOG4105C8I	G	sp|P54746|MNGB_ECOLI|Mannosylglycerate hydrolase OS=Escherichia coli (strain K12) OX=83333 GN=mngB PE=1 SV=2	alpha-mannosidase [Bacillus altitudinis] OJT53945.1 alpha-mannosidase [Bacillus altitudinis]
gene1799	145.031	51.3401	238.722	4.6498	2.21717	0.488029	1	gi|111111112|ref|scaffold2.1|	758981	759922	-	941	gene1799	GO:0008152;GO:0044237;GO:0044710;GO:0071704;GO:0009987;GO:1901576;GO:0009058;GO:0044238;GO:0044249;GO:0044281;GO:0006633;GO:0006631;GO:0019752;GO:0043436;GO:0044283;GO:0044255;GO:0044711;GO:0072330;GO:0006629;GO:0032787;GO:0008610;GO:0006082;GO:0046394;GO:0016053;GO:0046129;GO:0015936;GO:0015937;GO:0006732;GO:0034641;GO:0006807;GO:0009108;GO:0009163;GO:0072521;GO:0072522;GO:0009259;GO:1901360;GO:…	K01963	ENOG4107QTG	I	sp|A8FG57|ACCD_BACP2|Acetyl-coenzyme A carboxylase carboxyl transferase subunit beta OS=Bacillus pumilus (strain SAFR-032) OX=315750 GN=accD PE=3 SV=1	acetyl- carboxylase subunit beta [Bacillus stratosphericus LAMA 585]
gene459	162.968	87.2146	238.722	2.73718	1.45269	0.519636	1	gi|111111111|ref|scaffold1.1|	449446	450360	-	914	gene459	GO:0008152;GO:0009987;GO:0044237;GO:0044710;GO:0006091;GO:0044238;GO:0055114;GO:0006099;GO:0009060;GO:0045333;GO:0015980;GO:0071704;GO:0019752;GO:0044281;GO:0043436;GO:0006082;GO:0006090;GO:0032787;GO:0016746;GO:0016740;GO:0003824;GO:0016747;GO:0016417;GO:0004149;GO:0016748;GO:0016751;GO:0016407;GO:0030523;GO:0016418;GO:0004742;GO:0005737;GO:0043234;GO:0032991;GO:0044464;GO:0005623;GO:0005622;GO:…	K00627	ENOG4105C7S	C	sp|P21883|ODP2_BACSU|Dihydrolipoyllysine-residue acetyltransferase component of pyruvate dehydrogenase complex OS=Bacillus subtilis (strain 168)OX=224308 GN=pdhC PE=1 SV=2	branched-chain alpha-keto acid dehydrogenase subunit E2 [Bacillus pumilus] KIL26562.1 Dihydrolipoamide acetyltransferase component [Bacillus pumilus]
gene1207	185.907	133.092	238.722	1.79365	0.842902	0.555808	1	gi|111111112|ref|scaffold2.1|	210302	211453	-	1151	gene1207	GO:0044249;GO:0034645;GO:0044267;GO:0044260;GO:0071704;GO:0010467;GO:1901576;GO:0009987;GO:0009058;GO:0009059;GO:0008152;GO:0044238;GO:0019538;GO:0044237;GO:0043170;GO:0006412;GO:0044710;GO:0044281;GO:0006796;GO:0006793;GO:0019637;GO:0055114;GO:0019752;GO:0019288;GO:0046490;GO:0006090;GO:0019682;GO:0008299;GO:0006644;GO:0009240;GO:0006629;GO:0006720;GO:1901135;GO:0032787;GO:0043436;GO:0044255;GO:…	K02945	ENOG4105CAV	J	sp|P38494|RS1H_BACSU|30S ribosomal protein S1 homolog OS=Bacillus subtilis (strain 168) OX=224308 GN=ypfD PE=1 SV=1	30S ribosomal protein S1 [Bacillus stratosphericus] KML00081.1 30S ribosomal protein S1 [Bacillus stratosphericus] KML52044.1 30S ribosomal protein S1 [Bacillus stratosphericus]
gene180	215.787	192.852	238.722	1.23785	0.307833	0.598022	1	gi|111111111|ref|scaffold1.1|	166782	168836	-	2054	gene180	GO:0034641;GO:0006807;GO:1901360;GO:0006139;GO:0071704;GO:0009987;GO:0006725;GO:0008152;GO:0046483;GO:0044238;GO:0044237;GO:0044249;GO:1901576;GO:0009058;GO:0044710;GO:0055114;GO:0090304;GO:0034645;GO:0044260;GO:0006260;GO:0009059;GO:0043170;GO:0006259;GO:0003824;GO:0016491;GO:0016725;GO:0016728;GO:0004748;GO:0005488;GO:0000166;GO:1901363;GO:1901265;GO:0036094;GO:0097159;GO:0043167;GO:0035639;GO:…	K00525	ENOG4105BZH	F	sp|P50620|RIR1_BACSU|Ribonucleoside-diphosphate reductase subunit alpha OS=Bacillus subtilis (strain 168) OX=224308 GN=nrdE PE=3 SV=1	ribonucleoside-diphosphate reductase, alpha subunit [Bacillus sp. M 2-6]
gene2185	62.2985	5.23623	119.361	22.7952	4.51066	0.649043	1	gi|111111113|ref|scaffold3.1|	208717	210174	+	1457	gene2185	GO:0005975;GO:0008152;GO:0044238;GO:0071704;GO:0004553;GO:0016787;GO:0003824;GO:0016798;GO:0004564;GO:0015926;GO:0004575;GO:0004558;GO:0031219;GO:0005623;GO:0044464;GO:0005737;GO:0005622;GO:0044424	K01193	ENOG4108HKT	G	sp|P07819|SCRB_BACSU|Sucrose-6-phosphate hydrolase OS=Bacillus subtilis (strain 168) OX=224308 GN=sacA PE=3 SV=2	sucrose-6-phosphate hydrolase [Bacillus stratosphericus] KOA80245.1 sucrose-6-phosphate hydrolase [Bacillus stratosphericus]
gene1412	63.4421	7.52341	119.361	15.8653	3.9878	0.653023	1	gi|111111112|ref|scaffold2.1|	387652	388536	-	884	gene1412	GO:0006810;GO:0051234;GO:0051179;GO:0044699;GO:0009987;GO:0044763;GO:0055085;GO:0044765;GO:0006820;GO:0006811;GO:0035435;GO:0034220;GO:0006817;GO:0015698;GO:0005215;GO:0022857;GO:0022804;GO:0015291;GO:0005315;GO:1901677;GO:0016020;GO:0005886;GO:0044464;GO:0005623;GO:0071944;GO:0016021;GO:0044425;GO:0031224;GO:0044459;GO:0005887;GO:0031226	K02038	ENOG4105E2Z	P	sp|P46340|YQGI_BACSU|Probable ABC transporter permease protein YqgI OS=Bacillus subtilis (strain 168) OX=224308 GN=yqgI PE=3 SV=2	phosphate ABC transporter, permease protein PstA [Bacillus pumilus]
gene1888	65.7502	12.1397	119.361	9.8323	3.29753	0.660595	1	gi|111111112|ref|scaffold2.1|	848671	850308	-	1637	gene1888	GO:0043170;GO:1901576;GO:0071704;GO:0000271;GO:0009058;GO:0009059;GO:0008152;GO:0044723;GO:0044238;GO:0005975;GO:0005976;GO:0016051;GO:0016020	-	ENOG4105CKP	M	sp|O34674|MURJ_BACSU|Lipid II flippase MurJ OS=Bacillus subtilis (strain 168) OX=224308 GN=murJ PE=1 SV=1	polysaccharide biosynthesis protein [Bacillus stratosphericus LAMA 585]
gene3614	65.8005	12.2402	119.361	9.75154	3.28563	0.66075	1	gi|111111118|ref|scaffold8.1|	32616	33215	+	599	gene3614	GO:0008152;GO:0016311;GO:0009987;GO:0044237;GO:0006796;GO:0006793;GO:0003824;GO:0016791;GO:0035639;GO:0042578;GO:0005488;GO:0000166;GO:1901363;GO:0001883;GO:0001882;GO:0043168;GO:0043167;GO:1901265;GO:0032549;GO:0017076;GO:0005524;GO:0016787;GO:0016788;GO:0036094;GO:0030554;GO:0097159;GO:0004647;GO:0032559;GO:0032555;GO:0032550;GO:0032553	K05518	ENOG41068BG	T	sp|P17906|RSBX_BACSU|Phosphoserine phosphatase RsbX OS=Bacillus subtilis (strain 168) OX=224308 GN=rsbX PE=1 SV=1	serine phosphatase [Bacillus stratosphericus] EMI15016.1 serine phosphatase [Bacillus stratosphericus LAMA 585]
gene273	65.855	12.3491	119.361	9.66554	3.27285	0.660919	1	gi|111111111|ref|scaffold1.1|	269611	271644	-	2033	gene273	GO:0044699;GO:0009987;GO:0044763;GO:0051179;GO:0008104;GO:0032940;GO:0071702;GO:0033036;GO:0006810;GO:0009306;GO:0045184;GO:0044765;GO:0051649;GO:0051234;GO:0051641;GO:0046903;GO:0015031;GO:0016020;GO:0016021;GO:0044425;GO:0031224	K02400	ENOG4105D7B	N	sp|P35620|FLHA_BACSU|Flagellar biosynthesis protein FlhA OS=Bacillus subtilis (strain 168) OX=224308 GN=flhA PE=1 SV=2	flagellar biosynthesis protein FlhA [Bacillus australimaris] KPN13451.1 flagellar biosynthesis protein FlhA [Bacillus australimaris]
gene1747	68.7872	18.2137	119.361	6.55336	2.71223	0.669565	1	gi|111111112|ref|scaffold2.1|	706863	707636	-	773	gene1747	GO:0009055	K03521	ENOG4105BZJ	C	sp|P94550|ETFB_BACSU|Electron transfer flavoprotein subunit beta OS=Bacillus subtilis (strain 168) OX=224308 GN=etfB PE=3 SV=1	electron transfer flavoprotein subunit beta [Bacillus pumilus] AHL72366.1 electron transfer flavoprotein subunit beta [Bacillus pumilus]
gene3085	70.4628	21.5649	119.361	5.53497	2.46857	0.67434	1	gi|111111115|ref|scaffold5.1|	59042	60115	+	1073	gene3085	GO:0008152;GO:0034641;GO:0009165;GO:0044237;GO:0072522;GO:0006139;GO:0044710;GO:1901362;GO:1901360;GO:0009259;GO:0071704;GO:0018130;GO:0009987;GO:1901576;GO:0006164;GO:0006725;GO:0009152;GO:0009150;GO:0072521;GO:0009260;GO:0009058;GO:0019438;GO:0034654;GO:1901564;GO:0090407;GO:0055086;GO:0046483;GO:0044238;GO:0044271;GO:1901566;GO:0044249;GO:1901137;GO:1901135;GO:0046390;GO:0019693;GO:0006163;GO:…	K01933	ENOG4105CXB	F	sp|A8FAM9|PUR5_BACP2|Phosphoribosylformylglycinamidine cyclo-ligase OS=Bacillus pumilus (strain SAFR-032) OX=315750 GN=purM PE=3 SV=1	phosphoribosylaminoimidazole synthetase [Bacillus stratosphericus LAMA 585]
gene2806	70.7644	22.1681	119.361	5.38435	2.42877	0.675203	1	gi|111111114|ref|scaffold4.1|	85958	86056	-	98	gene2806	GO:0006818;GO:0015992;GO:0055085;GO:0006812;GO:0006811;GO:0006810;GO:0034219;GO:0008643;GO:0009401;GO:0034220;GO:0044765;GO:0044763;GO:0008152;GO:0071702;GO:0051179;GO:0009987;GO:0051234;GO:0015672;GO:0044699;GO:0015295;GO:0015294;GO:0022891;GO:0022892;GO:0005351;GO:0015293;GO:0051119;GO:0005215;GO:0008324;GO:0022857;GO:0015075;GO:0003824;GO:0016740;GO:1901476;GO:0005402;GO:0015291;GO:0015144;GO:…	-	ENOG4105TM3	G	-	PTS glucose transporter subunit IIA [Bacillus pumilus] KMY22420.1 PTS glucose transporter subunit IIA [Bacillus pumilus]
gene1805	71.6232	23.8856	119.361	4.99719	2.32112	0.677662	1	gi|111111112|ref|scaffold2.1|	766195	767136	-	941	gene1805	GO:0008152;GO:0005488;GO:0016787;GO:0043169;GO:0046914;GO:0043167;GO:0046872;GO:0030145;GO:0003824;GO:0003676;GO:1901363;GO:0097159	K06881	ENOG4105SFS	J	sp|O34600|NRNA_BACSU|Bifunctional oligoribonuclease and PAP phosphatase NrnA OS=Bacillus subtilis (strain 168) OX=224308 GN=nrnA PE=1 SV=1	bifunctional oligoribonuclease/PAP phosphatase NrnA [Bacillus sp. L_1B0_12] KKK09296.1 oligoribonuclease [Bacillus sp. L_1B0_12] CVM35852.1 phosphoesterase [Streptococcus pneumoniae]
gene3086	71.6776	23.9945	119.361	4.97451	2.31455	0.677818	1	gi|111111115|ref|scaffold5.1|	60112	60681	+	569	gene3086	GO:0008152;GO:0009058;GO:0032259;GO:0009987;GO:0044237;GO:0044710;GO:1901360;GO:0071704;GO:0006725;GO:0046483;GO:0044238;GO:0006807;GO:0044281;GO:1901564;GO:0034641;GO:0006139;GO:0055086;GO:0006796;GO:0006793;GO:0019637;GO:0009117;GO:0006753;GO:0009165;GO:0072522;GO:1901362;GO:0009259;GO:0018130;GO:1901576;GO:0006164;GO:0009152;GO:0009150;GO:0072521;GO:0009260;GO:0019438;GO:0034654;GO:0090407;GO:…	K11175	ENOG4108V3E	F	sp|P12040|PUR3_BACSU|Phosphoribosylglycinamide formyltransferase OS=Bacillus subtilis (strain 168) OX=224308 GN=purN PE=3 SV=2	phosphoribosylglycinamide formyltransferase [Bacillus sp. L_1B0_12] KKK10281.1 phosphoribosylglycinamide formyltransferase [Bacillus sp. L_1B0_12]
gene1627	74.589	29.8172	119.361	4.00309	2.00111	0.686033	1	gi|111111112|ref|scaffold2.1|	593707	594726	-	1019	gene1627	GO:0009987;GO:0044763;GO:0044699;GO:0009653;GO:0071840;GO:0000902;GO:0048869;GO:0016043;GO:0032989;GO:0032502;GO:0044767;GO:0048856	K03569	ENOG4105DFF	D	sp|Q01465|MREB_BACSU|Rod shape-determining protein MreB OS=Bacillus subtilis (strain 168) OX=224308 GN=mreB PE=1 SV=3	rod shape-determining protein [Bacillus pumilus] EDW20671.1 Rod shape-determining protein MreB [Bacillus pumilus ATCC 7061] KIL20639.1 hypothetical protein B4127_2923 [Bacillus pumilus] KMY21706.1 rod shape-determining protein MreB [Bacillus pumilus] OBS84894.1 rod shape-determining protein [Bacillus pumilus]
gene1555	78.5727	37.7846	119.361	3.15898	1.65946	0.696614	1	gi|111111112|ref|scaffold2.1|	523516	524148	-	632	gene1555	GO:0016310;GO:0009987;GO:0008152;GO:0006796;GO:0006793;GO:0044237;GO:0071704;GO:0044238;GO:0006222;GO:0055086;GO:0009173;GO:0009218;GO:0072528;GO:0044249;GO:0034641;GO:0006807;GO:1901360;GO:0009163;GO:0009161;GO:0046134;GO:0009123;GO:1901362;GO:0009259;GO:0009124;GO:0072527;GO:0006220;GO:0006139;GO:1901564;GO:1901576;GO:0019693;GO:0046132;GO:0046131;GO:0046483;GO:0018130;GO:0009165;GO:0046390;GO:…	K00876	ENOG4107S03	F	sp|A8FFL8|URK_BACP2|Uridine kinase OS=Bacillus pumilus (strain SAFR-032) OX=315750 GN=udk PE=3 SV=1	uridine kinase [Bacillus pumilus] ALM28527.1 uridine kinase [Bacillus pumilus] ALM45066.1 uridine kinase [Bacillus pumilus] ANY96545.1 uridine kinase [Bacillus pumilus]
gene388	79.6158	39.8707	119.361	2.9937	1.58193	0.699215	1	gi|111111111|ref|scaffold1.1|	383565	384710	-	1145	gene388	GO:0007049;GO:0051301;GO:0009987;GO:0022607;GO:0016043;GO:0071840;GO:0044085;GO:0044763;GO:0044699;GO:0065003;GO:0070271;GO:0051258;GO:0043933;GO:0034622;GO:0071822;GO:0006461;GO:0043623;GO:0046434;GO:0009166;GO:0009164;GO:0044281;GO:0046130;GO:1901360;GO:1901361;GO:0044710;GO:0009199;GO:0042454;GO:0009207;GO:0009205;GO:0009203;GO:0046128;GO:0046483;GO:0000910;GO:1901564;GO:1901565;GO:0006163;GO:…	K03531	ENOG4105CDK	D	sp|P17865|FTSZ_BACSU|Cell division protein FtsZ OS=Bacillus subtilis (strain 168) OX=224308 GN=ftsZ PE=1 SV=3	cell division protein FtsZ [Bacillus xiamenensis] AOZ87378.1 cell division protein FtsZ [Bacillus xiamenensis]
gene2681	81.5511	43.7413	119.361	2.72879	1.44826	0.70379	1	gi|111111113|ref|scaffold3.1|	689114	691456	+	2342	gene2681	GO:0044710;GO:0008152;GO:0006631;GO:0055114;GO:0044281;GO:0032787;GO:0043436;GO:0009987;GO:0006082;GO:0019752;GO:0071704;GO:0044237;GO:0006629;GO:0044255;GO:0044238;GO:0044282;GO:0044712;GO:0072329;GO:0016054;GO:1901575;GO:0046395;GO:0044248;GO:0009056;GO:0009062;GO:0016042;GO:0044242;GO:0034440;GO:0019395;GO:0006635;GO:0030258;GO:0016491;GO:0003824;GO:0016614;GO:0016616;GO:0003857;GO:0050662;GO:…	K07516	ENOG4105DYT	I	sp|O32178|FADN_BACSU|Probable 3-hydroxyacyl-CoA dehydrogenase OS=Bacillus subtilis (strain 168) OX=224308 GN=fadN PE=2 SV=2	3-hydroxyacyl-CoA dehydrogenase [Bacillus sp. UNC125MFCrub1.1]
gene3717	743.066	1486.13	0	0	-Inf	0.704223	1	gi|111111119|ref|scaffold9.1|	43453	44721	+	1268	gene3717	GO:0015031;GO:0008104;GO:0051179;GO:0071702;GO:0033036;GO:0006810;GO:0045184;GO:0051234;GO:0044699;GO:0009987;GO:0044765;GO:0044763;GO:0051649;GO:0051641;GO:0043952;GO:0071806;GO:0070727;GO:0006886;GO:0065002;GO:0034613;GO:0055085;GO:0046907;GO:0006605;GO:0016020;GO:0044464;GO:0005623;GO:0071944;GO:0005886;GO:0031224;GO:0016021;GO:0044425	K03076	ENOG4105CGG	U	sp|Q05207|SECY_BACLD|Protein translocase subunit SecY OS=Bacillus licheniformis (strain ATCC 14580 / DSM 13 / JCM 2505 / NBRC 12200 / NCIMB 9375/ NRRL NRS-1264 / Gibson 46) OX=279010 GN=secY PE=3 SV=2	preprotein translocase subunit SecY [Bacillus pumilus] AMM87604.1 preprotein translocase subunit SecY [Bacillus pumilus]
gene1634	85.6814	52.002	119.361	2.29531	1.19869	0.712502	1	gi|111111112|ref|scaffold2.1|	599712	602408	-	2696	gene1634	GO:0006450;GO:0006418;GO:0008152;GO:0006438;GO:0019752;GO:0090304;GO:0044249;GO:0034641;GO:0006807;GO:0044281;GO:0034645;GO:0034660;GO:1901360;GO:0006139;GO:0044710;GO:0044260;GO:0006520;GO:0071704;GO:0010467;GO:0043039;GO:0044267;GO:0006725;GO:0009987;GO:0009058;GO:0009059;GO:0043436;GO:0046483;GO:0016070;GO:0044238;GO:1901564;GO:0006082;GO:0019538;GO:0044237;GO:0043170;GO:0006399;GO:0043038;GO:…	K01873	ENOG4105CA4	J	sp|Q05873|SYV_BACSU|Valine--tRNA ligase OS=Bacillus subtilis (strain 168) OX=224308 GN=valS PE=1 SV=3	valyl-trna synthetase [Bacillus stratosphericus LAMA 585]
gene369	88.5676	57.7744	119.361	2.06598	1.04683	0.718065	1	gi|111111111|ref|scaffold1.1|	362876	365641	-	2765	gene369	GO:0006450;GO:0006418;GO:0008152;GO:0019752;GO:0090304;GO:0044249;GO:0034641;GO:0006807;GO:0044281;GO:0034645;GO:0034660;GO:1901360;GO:0006139;GO:0044710;GO:0044260;GO:0006520;GO:0071704;GO:0010467;GO:0043039;GO:0044267;GO:0006725;GO:0009987;GO:0009058;GO:0009059;GO:0043436;GO:0046483;GO:0016070;GO:0044238;GO:1901564;GO:0006082;GO:0019538;GO:0044237;GO:0043170;GO:0006399;GO:0043038;GO:1901576;GO:…	K01870	ENOG4105C07	J	sp|Q45477|SYI_BACSU|Isoleucine--tRNA ligase OS=Bacillus subtilis (strain 168) OX=224308 GN=ileS PE=3 SV=3	isoleucine--tRNA ligase [Bacillus pumilus] AKU32221.1 isoleucine--tRNA ligase [Bacillus pumilus]
gene284	89.9709	60.581	119.361	1.97027	0.978391	0.720665	1	gi|111111111|ref|scaffold1.1|	278377	279138	-	761	gene284	GO:0006928;GO:0044699;GO:0009987;GO:0044763;GO:0008152;GO:0001539;GO:0051179;GO:0040011;GO:0048870;GO:0051674;GO:0005198;GO:0003774;GO:0016787;GO:0017111;GO:0003824;GO:0016818;GO:0016817;GO:0016462;GO:0009288;GO:0044464;GO:0005623;GO:0043229;GO:0043228;GO:0043226;GO:0043232;GO:0005622;GO:0044424;GO:0009425;GO:0042995;GO:0044461;GO:0044463;GO:0044422;GO:0009426;GO:0030694	K02390	ENOG4105CGA	N	sp|P23446|FLGG_BACSU|Flagellar basal-body rod protein FlgG OS=Bacillus subtilis (strain 168) OX=224308 GN=flgG PE=3 SV=2	flagellar basal body rod protein FlgG [Bacillus altitudinis] KLV23403.1 flagellar basal body rod protein FlgG [Bacillus altitudinis]
gene389	90.2264	61.0921	119.361	1.95378	0.966272	0.721132	1	gi|111111111|ref|scaffold1.1|	384744	386066	-	1322	gene389	GO:0009987;GO:0044763;GO:0044699;GO:0007049;GO:0051301;GO:0022604;GO:0022603;GO:0051128;GO:0050789;GO:0065007;GO:0065008;GO:0050793;GO:0050794;GO:0008360	K03590	ENOG4105CIT	D	sp|P28264|FTSA_BACSU|Cell division protein FtsA OS=Bacillus subtilis (strain 168) OX=224308 GN=ftsA PE=1 SV=2	cell division protein FtsA [Bacillus australimaris] KPN13562.1 cell division protein FtsA [Bacillus australimaris]
gene1049	711.188	1422.38	0	0	-Inf	0.721789	1	gi|111111112|ref|scaffold2.1|	71213	74047	-	2834	gene1049	GO:0044710;GO:0008152;GO:0055114;GO:0006091;GO:0009987;GO:0044238;GO:0044237;GO:0006099;GO:0009060;GO:0045333;GO:0015980;GO:0071704;GO:0019320;GO:0046365;GO:0006096;GO:0019318;GO:1901575;GO:0044723;GO:0009056;GO:0044724;GO:0005975;GO:0005996;GO:0016052;GO:0006006;GO:0006007;GO:0003824;GO:0016491;GO:0016624;GO:0016903;GO:0004591;GO:0005488;GO:0043169;GO:0043167;GO:1901363;GO:0043168;GO:0030976;GO:…	K00164	ENOG4105C7P	C	sp|A8FE66|ODO1_BACP2|2-oxoglutarate dehydrogenase E1 component OS=Bacillus pumilus (strain SAFR-032) OX=315750 GN=odhA PE=3 SV=1	2-oxoglutarate dehydrogenase E1 component [Bacillus sp. TH007] KRV45620.1 2-oxoglutarate dehydrogenase subunit E1 [Bacillus sp. TH007]
gene1330	91.215	63.0693	119.361	1.89253	0.92032	0.722925	1	gi|111111112|ref|scaffold2.1|	318597	319592	-	995	gene1330	GO:0044710;GO:0008152;GO:0055114;GO:0071704;GO:0009987;GO:0044237;GO:1901575;GO:0009056;GO:0019320;GO:0046365;GO:0006091;GO:0006096;GO:0019318;GO:0044723;GO:0044724;GO:0044238;GO:0005975;GO:0005996;GO:0016052;GO:0006006;GO:0006007;GO:0016624;GO:0016491;GO:0003824;GO:0016903;GO:0004738;GO:0004739;GO:0043169;GO:0005488;GO:1901363;GO:0030976;GO:0043167;GO:1901681;GO:0050662;GO:0036094;GO:0048037;GO:…	K00166	ENOG4107RUY	C	sp|P37940|ODBA_BACSU|2-oxoisovalerate dehydrogenase subunit alpha OS=Bacillus subtilis (strain 168) OX=224308 GN=bfmBAA PE=1 SV=1	2-oxoisovalerate dehydrogenase E1 component alpha subunit [Bacillus sp. nio-1130] SIT90682.1 branched-chain alpha-keto acid dehydrogenase E1 component [Bacillus sp. RRD69]
gene3701	107.435	95.5087	119.361	1.24974	0.321624	0.750575	1	gi|111111119|ref|scaffold9.1|	35895	36182	+	287	gene3701	GO:0071704;GO:0044238;GO:0034645;GO:0044260;GO:0044267;GO:0019538;GO:0009987;GO:0010467;GO:0044237;GO:0043170;GO:0044249;GO:0009058;GO:0009059;GO:0008152;GO:1901576;GO:0006412;GO:0036094;GO:0097159;GO:0005198;GO:0003735;GO:0005488;GO:0000166;GO:1901363;GO:1901265;GO:0003676;GO:0019843;GO:0003723;GO:0005737;GO:0032991;GO:0005840;GO:0043232;GO:0044464;GO:0044444;GO:0005623;GO:0030529;GO:0043229;GO:…	K02892	ENOG41080UE	J	sp|A8F987|RL23_BACP2|50S ribosomal protein L23 OS=Bacillus pumilus (strain SAFR-032) OX=315750 GN=rplW PE=3 SV=1	50S ribosomal protein L23 [Bacillus xiamenensis] EKF36439.1 50S ribosomal protein L23 [Bacillus xiamenensis] AOZ88555.1 50S ribosomal protein L23 [Bacillus xiamenensis]
gene2912	638.782	1277.56	0	0	-Inf	0.764084	1	gi|111111114|ref|scaffold4.1|	189948	191495	+	1547	gene2912	GO:0008152;GO:0044710;GO:0055114;GO:0009987;GO:0071704;GO:0044237;GO:0044281;GO:0006082;GO:0043436;GO:0019752;GO:0044238;GO:0006807;GO:1901564;GO:0006520;GO:0009056;GO:1901575;GO:0044282;GO:0044712;GO:0044248;GO:0016054;GO:0046395;GO:1901565;GO:0009063;GO:1901605;GO:1901576;GO:0044249;GO:0009058;GO:0009064;GO:1901566;GO:0044283;GO:0044711;GO:0016053;GO:0008652;GO:0046394;GO:1901360;GO:1901606;GO:…	K00294	ENOG4105C26	C	sp|A8F9T1|ROCA_BACP2|1-pyrroline-5-carboxylate dehydrogenase OS=Bacillus pumilus (strain SAFR-032) OX=315750 GN=rocA PE=3 SV=1	NADP-dependent glyceraldehyde-3-phosphate dehydrogenase [Streptococcus pneumoniae]
gene3696	638.396	1276.79	0	0	-Inf	0.764319	1	gi|111111119|ref|scaffold9.1|	31791	32981	+	1190	gene3696	GO:0006184;GO:0008152;GO:0044238;GO:0009987;GO:0071704;GO:0044237;GO:0019538;GO:0044267;GO:0044260;GO:0044249;GO:0034645;GO:0043170;GO:0010467;GO:1901576;GO:0009058;GO:0009059;GO:0006414;GO:0006412;GO:0046434;GO:0009166;GO:0009164;GO:0044281;GO:0046130;GO:1901360;GO:1901361;GO:0044710;GO:0046128;GO:0009199;GO:0042454;GO:0009207;GO:0009205;GO:0046039;GO:0046483;GO:1901564;GO:1901565;GO:0006163;GO:…	K02358	ENOG4105CGV	J	sp|A8F982|EFTU_BACP2|Elongation factor Tu OS=Bacillus pumilus (strain SAFR-032) OX=315750 GN=tuf PE=3 SV=1	elongation factor Tu [Bacillus pumilus] A8F982.1 RecName: Full=Elongation factor Tu; Short=EF-Tu ABV60799.1 elongation factor Tu [Bacillus pumilus SAFR-032] OUZ08988.1 translation elongation factor Tu [Bacillus pumilus]
gene1466	119.361	119.361	119.361	1	1.28137e-15	0.767884	1	gi|111111112|ref|scaffold2.1|	437647	439485	-	1838	gene1466	GO:0009987;GO:0008152;GO:0044267;GO:0044260;GO:0071704;GO:0044238;GO:0019538;GO:0044237;GO:0043170;GO:0006950;GO:0050896;GO:0006457;GO:0005488;GO:0043167;GO:0035639;GO:1901363;GO:1901265;GO:0043168;GO:0000166;GO:0001883;GO:0032549;GO:0017076;GO:0001882;GO:0005524;GO:0036094;GO:0030554;GO:0097159;GO:0032559;GO:0032555;GO:0032550;GO:0032553;GO:0003824	K04043	ENOG4105CFG	O	sp|A8FFD2|DNAK_BACP2|Chaperone protein DnaK OS=Bacillus pumilus (strain SAFR-032) OX=315750 GN=dnaK PE=3 SV=1	molecular chaperone DnaK [Bacillus sp. Leaf49] KQU10574.1 Fe-S protein assembly chaperone HscA [Bacillus sp. Leaf49]
gene107	605.664	1211.33	0	0	-Inf	0.7847	1	gi|111111111|ref|scaffold1.1|	104217	106946	-	2729	gene107	GO:0008152;GO:0044710;GO:0044238;GO:0009987;GO:0044237;GO:0006099;GO:0006091;GO:0045333;GO:0055114;GO:0015980;GO:0009060;GO:0005488;GO:0051540;GO:0051536;GO:0043169;GO:0043167;GO:0046872;GO:0003824;GO:0016829;GO:0051539;GO:0016835;GO:0016836;GO:0003994;GO:0052632;GO:0052633	K01681	ENOG4108I0Z	C	sp|P09339|ACNA_BACSU|Aconitate hydratase A OS=Bacillus subtilis (strain 168) OX=224308 GN=citB PE=1 SV=4	aconitate hydratase [Bacillus stratosphericus LAMA 585]
gene3695	876.502	1633.64	119.361	0.0730642	-3.77469	0.867084	1	gi|111111119|ref|scaffold9.1|	29640	31673	+	2033	gene3695	GO:0006184;GO:0044237;GO:0071704;GO:0009987;GO:0008152;GO:0044238;GO:0046434;GO:0009141;GO:0009143;GO:0009144;GO:0009146;GO:0009166;GO:0009164;GO:0006807;GO:0034655;GO:0046039;GO:0006195;GO:0046130;GO:0009259;GO:1901360;GO:1901361;GO:0046700;GO:0006139;GO:0044710;GO:0072523;GO:1901565;GO:1901068;GO:0042278;GO:1901069;GO:0009199;GO:0055086;GO:0006152;GO:0046483;GO:0009207;GO:0009205;GO:0009203;GO:…	K02355	ENOG4105CEJ	J	sp|A8F981|EFG_BACP2|Elongation factor G OS=Bacillus pumilus (strain SAFR-032) OX=315750 GN=fusA PE=3 SV=1	elongation factor G [Bacillus altitudinis] KLV18518.1 elongation factor G [Bacillus altitudinis]
gene3702	465.391	930.783	0	0	-Inf	0.883113	1	gi|111111119|ref|scaffold9.1|	36211	37044	+	833	gene3702	GO:0008152;GO:0071704;GO:0044238;GO:0034645;GO:0044260;GO:0044267;GO:0019538;GO:0009987;GO:0010467;GO:0044237;GO:0043170;GO:0044249;GO:0009058;GO:0009059;GO:1901576;GO:0006412;GO:0003723;GO:0005488;GO:0097159;GO:0005198;GO:0003735;GO:0003824;GO:0016740;GO:0003676;GO:1901363;GO:0019843;GO:0044464;GO:0005623;GO:0005840;GO:0005737;GO:0044391;GO:0015934;GO:0043232;GO:0044444;GO:0030529;GO:0044446;GO:…	K02886	ENOG4105CFD	J	sp|A8F988|RL2_BACP2|50S ribosomal protein L2 OS=Bacillus pumilus (strain SAFR-032) OX=315750 GN=rplB PE=3 SV=1	50S ribosomal protein L2 [Bacillus pumilus] EDW20355.1 ribosomal protein L2 [Bacillus pumilus ATCC 7061] KIL23240.1 hypothetical protein B4127_0091 [Bacillus pumilus] KMY19009.1 50S ribosomal protein L2 [Bacillus pumilus] KRU14925.1 50S ribosomal protein L2 [Bacillus pumilus] AMM95969.1 50S ribosomal protein L2 [Bacillus pumilus] OBS86593.1 50S ribosomal protein L2 [Bacillus pumilus]
gene3033	460.574	921.148	0	0	-Inf	0.886861	1	gi|111111115|ref|scaffold5.1|	7864	8628	+	764	gene3033	GO:0015031;GO:0051179;GO:0006810;GO:0051234;GO:0008104;GO:0071702;GO:0033036;GO:0045184;GO:0044699;GO:0009987;GO:0044765;GO:0044763;GO:0055085;GO:0071806;GO:0043953;GO:0008565;GO:0022891;GO:0022892;GO:0022884;GO:0005215;GO:0008320;GO:0022857;GO:0016020;GO:0044464;GO:0005623;GO:0071944;GO:0005886;GO:0016021;GO:0044425;GO:0031224;GO:0043234;GO:0032991;GO:0044459;GO:0033281;GO:0005887;GO:0031226	K03118	ENOG4105DCX	U	sp|O05523|TATCY_BACSU|Sec-independent protein translocase protein TatCy OS=Bacillus subtilis (strain 168) OX=224308 GN=tatC2 PE=1 SV=1	component of the twin-arginine pre-protein translocation pathway [Bacillus stratosphericus LAMA 585]
gene2724	445.142	890.284	0	0	-Inf	0.899051	1	gi|111111114|ref|scaffold4.1|	14571	15134	+	563	gene2724	GO:0080090;GO:0019222;GO:0060255;GO:2001141;GO:0050789;GO:0065007;GO:0009889;GO:0050794;GO:0010556;GO:0051252;GO:0031326;GO:0031323;GO:0019219;GO:0051171;GO:0006355;GO:2000112;GO:0010468;GO:0009987;GO:1901362;GO:1901360;GO:0046483;GO:0019438;GO:0006807;GO:0043170;GO:1901576;GO:0044260;GO:0018130;GO:0008152;GO:0034654;GO:0016070;GO:0044271;GO:0006351;GO:0006352;GO:0032774;GO:0044249;GO:0034641;GO:…	K03088	ENOG4105EMN	K	sp|Q45585|SIGW_BACSU|ECF RNA polymerase sigma factor SigW OS=Bacillus subtilis (strain 168) OX=224308 GN=sigW PE=1 SV=1	RNA polymerase sigma factor SigW [Bacillus safensis] KKD40630.1 RNA polymerase sigma factor SigW [Bacillus safensis]
gene669	384.913	769.826	0	0	-Inf	0.949432	1	gi|111111111|ref|scaffold1.1|	643859	644761	-	902	gene669	GO:0006928;GO:0044699;GO:0009987;GO:0044763;GO:0001539;GO:0051674;GO:0051179;GO:0040011;GO:0048870;GO:0005198;GO:0009288;GO:0044464;GO:0005623;GO:0043229;GO:0043228;GO:0043226;GO:0043232;GO:0005622;GO:0044424;GO:0009420;GO:0042995;GO:0044461;GO:0044463;GO:0044422	K02406	ENOG4105I03	N	sp|P02968|FLA_BACSU|Flagellin OS=Bacillus subtilis (strain 168) OX=224308 GN=hag PE=1 SV=2	flagellin [Bacillus pumilus] ABV61833.1 flagellin [Bacillus pumilus SAFR-032]
gene1281	365.371	730.742	0	0	-Inf	0.966777	1	gi|111111112|ref|scaffold2.1|	271807	272991	-	1184	gene1281	-	K06359	ENOG4108KVU	T	sp|Q00828|RAPA_BACSU|Response regulator aspartate phosphatase A OS=Bacillus subtilis (strain 168) OX=224308 GN=rapA PE=2 SV=2	aspartate phosphatase [Bacillus sp. UNC125MFCrub1.1]
gene2567	342.487	684.974	0	0	-Inf	0.987727	1	gi|111111113|ref|scaffold3.1|	580409	581602	+	1193	gene2567	GO:0008152;GO:0009987;GO:0071704;GO:0044237;GO:1901564;GO:0006807;GO:0044281;GO:0044710;GO:0043436;GO:0006082;GO:0019752;GO:0009064;GO:1901605;GO:0006520;GO:0044238;GO:0009058;GO:0044283;GO:0044711;GO:1901566;GO:1901576;GO:0046394;GO:0044249;GO:0016053;GO:0006525;GO:0008652;GO:1901607;GO:0009084;GO:0006526;GO:0043648;GO:0009067;GO:0009066;GO:0009085;GO:0006553;GO:0008483;GO:0016740;GO:0016769;GO:…	K00819	ENOG4105C8Y	E	sp|P38021|OAT_BACSU|Ornithine aminotransferase OS=Bacillus subtilis (strain 168) OX=224308 GN=rocD PE=1 SV=2	ornithine--oxo-acid transaminase [Bacillus pumilus] AKC67426.1 ornithine--oxo-acid aminotransferase [Bacillus pumilus]
gene172	340.757	681.514	0	0	-Inf	0.989339	1	gi|111111111|ref|scaffold1.1|	158409	159743	-	1334	gene172	GO:0006807;GO:0008152;GO:0071704;GO:0009987;GO:0044237;GO:0019752;GO:0044281;GO:0009064;GO:0044710;GO:0006520;GO:0006541;GO:1901605;GO:0044238;GO:0043436;GO:1901564;GO:0006082;GO:0044283;GO:0044249;GO:1901576;GO:0044711;GO:0006542;GO:1901607;GO:0009058;GO:0008652;GO:1901566;GO:0046394;GO:0016053;GO:0009084;GO:0009399;GO:0071941;GO:0003824;GO:0016211;GO:0016880;GO:0016879;GO:0016874;GO:0004356;GO:…	K01915	ENOG4105C5F	E	sp|P12425|GLN1A_BACSU|Glutamine synthetase OS=Bacillus subtilis (strain 168) OX=224308 GN=glnA PE=1 SV=3	type I glutamate--ammonia ligase [Bacillus zhangzhouensis] KEP25327.1 glutamine synthetase [Bacillus zhangzhouensis]
gene3690	338.725	677.45	0	0	-Inf	0.991237	1	gi|111111119|ref|scaffold9.1|	20919	24359	+	3440	gene3690	GO:0032774;GO:1901362;GO:1901360;GO:0046483;GO:0019438;GO:0006807;GO:1901576;GO:0044260;GO:0018130;GO:0008152;GO:0034654;GO:0016070;GO:0044271;GO:0006351;GO:0044249;GO:0034641;GO:0034645;GO:0006139;GO:0009987;GO:0006725;GO:0043170;GO:0090304;GO:0044237;GO:0071704;GO:0010467;GO:0009058;GO:0009059;GO:0044238;GO:0003677;GO:0032549;GO:0034062;GO:0003676;GO:1901363;GO:0001882;GO:0016740;GO:0036094;GO:…	K03043	ENOG4108IIJ	K	sp|A8F976|RPOB_BACP2|DNA-directed RNA polymerase subunit beta OS=Bacillus pumilus (strain SAFR-032) OX=315750 GN=rpoB PE=3 SV=1	DNA-directed RNA polymerase beta subunit [Bacillus pumilus]
gene2725	331.135	662.269	0	0	-Inf	0.998377	1	gi|111111114|ref|scaffold4.1|	15149	15775	+	626	gene2725	GO:0016020;GO:0044425;GO:0016021;GO:0031224	-	ENOG4105KXB	K	sp|Q65P50|RSIW_BACLD|Anti-sigma-W factor RsiW OS=Bacillus licheniformis (strain ATCC 14580 / DSM 13 / JCM 2505 / NBRC 12200 / NCIMB 9375 / NRRL NRS-1264 / Gibson 46) OX=279010 GN=rsiW PE=3 SV=1	anti-sigma factor [Bacillus stratosphericus LAMA 585]
gene1	0.00837796	0.0167559	0	0	-Inf	1	1	gi|111111111|ref|scaffold1.1|	3823	3981	-	158	gene1	-	-	-	-	-	hypothetical protein GA0061086_1022 [Bacillus sp. nio-1130]
gene10	0.0670237	0.134047	0	0	-Inf	1	1	gi|111111111|ref|scaffold1.1|	10388	11488	-	1100	gene10	GO:0032502;GO:0009847;GO:0044425;GO:0016021;GO:0016020;GO:0031224	-	ENOG4108TZ5	S	sp|Q93LK8|GERQB_BACCE|Spore germination protein GerQB OS=Bacillus cereus OX=1396 GN=gerQB PE=3 SV=1	amino acid transporter [Bacillus pumilus] AMM89190.1 amino acid transporter [Bacillus pumilus]
gene100	0.896442	1.79288	0	0	-Inf	1	1	gi|111111111|ref|scaffold1.1|	101879	102103	-	224	gene100	-	-	-	-	-	-
gene1000	119.227	238.454	0	0	-Inf	1	1	gi|111111112|ref|scaffold2.1|	16221	20792	-	4571	gene1000	GO:0008152;GO:0006807;GO:0006537;GO:0044238;GO:0019752;GO:0044281;GO:0044710;GO:0006520;GO:0071704;GO:0009987;GO:0043436;GO:1901564;GO:0006082;GO:0044237;GO:0009064;GO:0044249;GO:0044283;GO:1901576;GO:0044711;GO:0043650;GO:1901605;GO:1901607;GO:0043648;GO:0009058;GO:0055114;GO:0008652;GO:1901566;GO:0046394;GO:0016053;GO:0006536;GO:0009084;GO:0015930;GO:0016491;GO:0003824;GO:0016638;GO:0045181;GO:…	K00265	ENOG4105CBC	E	sp|P39812|GLTA_BACSU|Glutamate synthase [NADPH] large chain OS=Bacillus subtilis (strain 168) OX=224308 GN=gltA PE=2 SV=3	glutamate synthase subunit alpha [Bacillus pumilus] BAT48959.1 glutamate synthase (NADPH) large subunit [Bacillus pumilus]
gene1002	2.98255	5.96511	0	0	-Inf	1	1	gi|111111112|ref|scaffold2.1|	21943	23676	+	1733	gene1002	GO:0006200;GO:0009987;GO:0008152;GO:0071704;GO:0044238;GO:0046434;GO:0009166;GO:0009167;GO:0009164;GO:0044281;GO:0009161;GO:0046130;GO:1901360;GO:0009169;GO:0044710;GO:0009199;GO:0042454;GO:0009207;GO:0009205;GO:0009203;GO:0046034;GO:0046128;GO:0046483;GO:1901564;GO:1901565;GO:0034641;GO:0006163;GO:0019637;GO:0009141;GO:0009143;GO:0009144;GO:0009146;GO:0006807;GO:0006195;GO:1901575;GO:1901361;GO:…	K06147	ENOG4105BZ1	V	sp|P9WQJ0|Y1273_MYCTO|Uncharacterized ABC transporter ATP-binding protein MT1311 OS=Mycobacterium tuberculosis (strain CDC 1551 / Oshkosh) OX=83331 GN=MT1311 PE=3 SV=1	ABC transporter ATP-binding protein [Bacillus pumilus] BAT48961.1 ABC transporter ATP-binding protein [Bacillus pumilus]
gene1003	12.5544	25.1087	0	0	-Inf	1	1	gi|111111112|ref|scaffold2.1|	23673	25502	+	1829	gene1003	GO:0006200;GO:0009987;GO:0008152;GO:0071704;GO:0044238;GO:0046434;GO:0009166;GO:0009167;GO:0009164;GO:0044281;GO:0009161;GO:0046130;GO:1901360;GO:0009169;GO:0044710;GO:0009199;GO:0042454;GO:0009207;GO:0009205;GO:0009203;GO:0046034;GO:0046128;GO:0046483;GO:1901564;GO:1901565;GO:0034641;GO:0006163;GO:0019637;GO:0009141;GO:0009143;GO:0009144;GO:0009146;GO:0006807;GO:0006195;GO:1901575;GO:1901361;GO:…	K06147	ENOG4105BZ1	V	sp|Q9WYC4|Y288_THEMA|Uncharacterized ABC transporter ATP-binding protein TM_0288 OS=Thermotoga maritima (strain ATCC 43589 / MSB8 / DSM 3109 /JCM 10099) OX=243274 GN=TM_0288 PE=1 SV=1	ABC transporter ATP-binding protein [Bacillus pumilus] KIL25040.1 hypothetical protein B4133_2051 [Bacillus pumilus] BAT48962.1 ABC transporter ATP-binding protein [Bacillus pumilus]
gene1004	0.125669	0.251339	0	0	-Inf	1	1	gi|111111112|ref|scaffold2.1|	25562	26380	-	818	gene1004	GO:0080090;GO:0019222;GO:0031326;GO:0031323;GO:0050789;GO:2000112;GO:0060255;GO:0065007;GO:0010468;GO:0019219;GO:0009889;GO:0050794;GO:0051171;GO:2001141;GO:0051252;GO:0006355;GO:0010556;GO:0003700;GO:0097159;GO:0000166;GO:0036094;GO:0005488;GO:1901363;GO:1901265;GO:0001071;GO:0003676;GO:0003677	-	ENOG41090E6	K	sp|P39842|BLTR_BACSU|Multidrug-efflux transporter 2 regulator OS=Bacillus subtilis (strain 168) OX=224308 GN=bltR PE=4 SV=1	MerR family transcriptional regulator [Bacillus pumilus] ANT56878.1 MerR family transcriptional regulator [Bacillus pumilus]
gene1005	0.0251339	0.0502678	0	0	-Inf	1	1	gi|111111112|ref|scaffold2.1|	26472	27041	+	569	gene1005	GO:0008152;GO:0008080;GO:0016740;GO:0003824;GO:0016407;GO:0016746;GO:0016747;GO:0016410	-	ENOG4108UYN	S	sp|P54441|YRKN_BACSU|Uncharacterized protein YrkN OS=Bacillus subtilis (strain 168) OX=224308 GN=yrkN PE=4 SV=1	GCN5-related N-acetyl transferase [Streptococcus pneumoniae]
gene1007	1.80126	3.60252	0	0	-Inf	1	1	gi|111111112|ref|scaffold2.1|	27223	28491	-	1268	gene1007	GO:0006561;GO:0044710;GO:0008152;GO:0044283;GO:0019752;GO:0044249;GO:0006807;GO:0044281;GO:0009064;GO:1901362;GO:1901360;GO:1901576;GO:0044711;GO:0006560;GO:0006520;GO:0071704;GO:1901605;GO:1901607;GO:0018130;GO:0044238;GO:0009987;GO:0009058;GO:0043436;GO:0046483;GO:0008652;GO:1901564;GO:1901566;GO:0006082;GO:0046394;GO:0016053;GO:0044237;GO:0009084;GO:0055114;GO:0055129;GO:0016491;GO:0050662;GO:…	K00147	ENOG4105C2S	E	sp|Q65IS9|PROA2_BACLD|Gamma-glutamyl phosphate reductase 2 OS=Bacillus licheniformis (strain ATCC 14580 / DSM 13 / JCM 2505 / NBRC 12200 / NCIMB 9375 / NRRL NRS-1264 / Gibson 46) OX=279010 GN=proA2 PE=3 SV=1	gamma-glutamyl-phosphate reductase [Bacillus aerophilus]
gene1008	0.36863	0.73726	0	0	-Inf	1	1	gi|111111112|ref|scaffold2.1|	28510	29370	-	860	gene1008	GO:0006561;GO:0009987;GO:0008152;GO:0044237;GO:0044283;GO:0019752;GO:0044249;GO:0006807;GO:0044281;GO:0009064;GO:1901362;GO:1901360;GO:1901576;GO:0044710;GO:0044711;GO:0006560;GO:0006520;GO:0071704;GO:1901605;GO:1901607;GO:0018130;GO:0044238;GO:0009058;GO:0043436;GO:0046483;GO:0008652;GO:1901564;GO:1901566;GO:0006082;GO:0046394;GO:0016053;GO:0009084;GO:0016310;GO:0006796;GO:0006793;GO:0055129;GO:…	K00931	ENOG4105CGT	E	sp|Q65IS8|PROB2_BACLD|Glutamate 5-kinase 2 OS=Bacillus licheniformis (strain ATCC 14580 / DSM 13 / JCM 2505 / NBRC 12200 / NCIMB 9375 / NRRL NRS-1264/ Gibson 46) OX=279010 GN=proB2 PE=3 SV=1	gamma-glutamyl kinase [Bacillus pumilus] ALM29077.1 gamma-glutamyl kinase [Bacillus pumilus] ALM45616.1 gamma-glutamyl kinase [Bacillus pumilus] ANY97096.1 gamma-glutamyl kinase [Bacillus pumilus]
gene1009	0.251339	0.502678	0	0	-Inf	1	1	gi|111111112|ref|scaffold2.1|	29656	30453	-	797	gene1009	GO:0044710;GO:0008152;GO:0006561;GO:0055114;GO:0044283;GO:0019752;GO:0044249;GO:0006807;GO:0044281;GO:0009064;GO:1901362;GO:1901360;GO:1901576;GO:0044711;GO:0006560;GO:0006520;GO:0071704;GO:1901605;GO:1901607;GO:0018130;GO:0044238;GO:0009987;GO:0009058;GO:0043436;GO:0046483;GO:0008652;GO:1901564;GO:1901566;GO:0006082;GO:0046394;GO:0016053;GO:0044237;GO:0009084;GO:0055129;GO:0004735;GO:0016491;GO:…	K00286	ENOG4105II7	E	sp|P0CI77|P5CR1_BACSU|Pyrroline-5-carboxylate reductase 1 OS=Bacillus subtilis (strain 168) OX=224308 GN=proH PE=3 SV=1	pyrroline-5-carboxylate reductase [Bacillus altitudinis 41KF2b] KKK10494.1 pyrroline-5-carboxylate reductase [Bacillus sp. L_1B0_12] KQU11975.1 pyrroline-5-carboxylate reductase [Bacillus sp. Leaf49] ALM29076.1 pyrroline-5-carboxylate reductase [Bacillus pumilus] ALM45615.1 pyrroline-5-carboxylate reductase [Bacillus pumilus] ANY97095.1 pyrroline-5-carboxylate reductase [Bacillus pumilus]
gene101	0.0795906	0.159181	0	0	-Inf	1	1	gi|111111111|ref|scaffold1.1|	102154	102462	-	308	gene101	-	-	ENOG4105MI2	S	sp|Q45062|YNEQ_BACSU|Uncharacterized protein YneQ OS=Bacillus subtilis (strain 168) OX=224308 GN=yneQ PE=4 SV=1	hypothetical protein [Bacillus pumilus] AMM89110.1 hypothetical protein UP15_09070 [Bacillus pumilus]
gene1010	1.43682	2.87364	0	0	-Inf	1	1	gi|111111112|ref|scaffold2.1|	30925	32121	+	1196	gene1010	GO:0008152;GO:0044710;GO:0055114;GO:0016705;GO:0005488;GO:1901363;GO:0020037;GO:0046906;GO:0097159;GO:0004497;GO:0016491;GO:0003824;GO:0043167;GO:0043169;GO:0046914;GO:0005506;GO:0046872;GO:0009055	K23138	ENOG4106A3M	Q	sp|P27632|CPXM_BACPZ|Cytochrome P450 109 OS=Bacillus subtilis subsp. spizizenii (strain ATCC 23059 / NRRL B-14472 / W23) OX=655816 GN=cyp109 PE=3 SV=1	cytochrome P450 [Bacillus stratosphericus] EMI11921.1 cytochrome p450 [Bacillus stratosphericus LAMA 585]
gene1011	4.58693	9.17387	0	0	-Inf	1	1	gi|111111112|ref|scaffold2.1|	32240	34279	+	2039	gene1011	GO:0044710;GO:0008152;GO:0055114;GO:0016491;GO:0003824;GO:0046872;GO:0005488;GO:0043169;GO:0043167;GO:0030151;GO:0046914;GO:0051536;GO:0051540;GO:0009055;GO:0051539;GO:0016661;GO:0016667;GO:0009389;GO:0008940;GO:0016651;GO:0050626;GO:0016662;GO:0044464;GO:0005623;GO:0042597	-	ENOG4108J2R	C	sp|C0SP82|YOAE_BACSU|Probable oxidoreductase YoaE OS=Bacillus subtilis (strain 168) OX=224308 GN=yoaE PE=3 SV=1	molybdopterin oxidoreductase family protein [Bacillus pumilus] AKC66268.1 oxidoreductase [Bacillus pumilus]
gene1012	0.0712127	0.142425	0	0	-Inf	1	1	gi|111111112|ref|scaffold2.1|	34326	35012	-	686	gene1012	GO:0071704;GO:0008152;GO:0044238;GO:0005975;GO:0000272;GO:1901575;GO:0009056;GO:0009057;GO:0005976;GO:0016052;GO:0043170;GO:0044036;GO:0071840;GO:0044260;GO:0071554;GO:0044699;GO:0009987;GO:0044763;GO:0010383;GO:0044237;GO:0045493;GO:0045491;GO:0010410;GO:0004553;GO:0016787;GO:0016798;GO:0003824;GO:0031176;GO:0030246;GO:0005488;GO:0030247;GO:0001871;GO:0016810	K01181	ENOG4107T94	G	sp|P00694|XYNA_BACPU|Endo-1,4-beta-xylanase A OS=Bacillus pumilus OX=1408 GN=xynA PE=1 SV=2	1,4-beta-xylanase [Bacillus sp. L_1B0_12] KKK10497.1 1,4-beta-xylanase [Bacillus sp. L_1B0_12]
gene1013	0.0377008	0.0754016	0	0	-Inf	1	1	gi|111111112|ref|scaffold2.1|	35107	36600	-	1493	gene1013	GO:0005975;GO:0008152;GO:0071704;GO:0044238;GO:0009987;GO:0044237;GO:0016310;GO:0006796;GO:0006793;GO:0046835;GO:0044262;GO:0044723;GO:0005996;GO:0019321;GO:0005997;GO:0044710;GO:0019521;GO:0019752;GO:0043436;GO:0044281;GO:0019520;GO:0032787;GO:0006082;GO:0016773;GO:0016740;GO:0003824;GO:0016772;GO:0016301;GO:0019200;GO:0004856;GO:0046316	K00854	ENOG4105CMG	G	sp|P39211|XYLB_BACSU|Xylulose kinase OS=Bacillus subtilis (strain 168) OX=224308 GN=xylB PE=3 SV=2	xylulokinase [Bacillus sp. L_1B0_12] KKK10498.1 xylulose kinase [Bacillus sp. L_1B0_12]
gene1015	0.578079	1.15616	0	0	-Inf	1	1	gi|111111112|ref|scaffold2.1|	38185	39345	+	1160	gene1015	GO:0080090;GO:0019222;GO:0031326;GO:0031323;GO:0050789;GO:2000112;GO:0060255;GO:0065007;GO:0010468;GO:0019219;GO:0009889;GO:0050794;GO:0051171;GO:2001141;GO:0051252;GO:0006355;GO:0010556;GO:0008152;GO:0009987;GO:0044237;GO:0016310;GO:0006796;GO:0006793;GO:0071704;GO:0044238;GO:0005975;GO:0001071;GO:0003700;GO:0003824;GO:0016740;GO:0016301;GO:0016772;GO:0044464;GO:0005623;GO:0005622	-	ENOG4105E2R	K	sp|P94490|XYLR_BACSU|Xylose repressor OS=Bacillus subtilis (strain 168) OX=224308 GN=xylR PE=3 SV=3	ROK family transcriptional regulator [Bacillus pumilus] APP16871.1 XylR family transcriptional regulator [Bacillus pumilus]
gene1016	0.69956	1.39912	0	0	-Inf	1	1	gi|111111112|ref|scaffold2.1|	39392	40999	-	1607	gene1016	GO:0005975;GO:0071704;GO:0008152;GO:0044238;GO:0004553;GO:0016787;GO:0016798;GO:0003824;GO:0009044;GO:0046556	K01198	ENOG4105DSG	G	sp|P07129|XYNB_BACPU|Beta-xylosidase OS=Bacillus pumilus OX=1408 GN=xynB PE=1 SV=2	glycoside hydrolase 43 family protein [Bacillus sp. Leaf49] KQU11982.1 beta-xylosidase [Bacillus sp. Leaf49]
gene1017	0.125669	0.251339	0	0	-Inf	1	1	gi|111111112|ref|scaffold2.1|	41025	42416	-	1391	gene1017	GO:0051179;GO:0044699;GO:0006810;GO:0044765;GO:0051234;GO:0006812;GO:0006811;GO:0015672;GO:0006814;GO:0030001;GO:0008643;GO:0071702;GO:0005215;GO:0016020	K03292	ENOG4105CT4	G	sp|P94488|YNAJ_BACSU|Uncharacterized symporter YnaJ OS=Bacillus subtilis (strain 168) OX=224308 GN=ynaJ PE=3 SV=2	MFS transporter [Bacillus pumilus] ALM29068.1 MFS transporter [Bacillus pumilus] ALM45607.1 MFS transporter [Bacillus pumilus] ANY97087.1 MFS transporter [Bacillus pumilus]
gene1018	0.0586457	0.117291	0	0	-Inf	1	1	gi|111111112|ref|scaffold2.1|	42926	43258	-	332	gene1018	GO:0008152;GO:0000049;GO:0097159;GO:0003723;GO:0003676;GO:1901363;GO:0005488;GO:0003824;GO:0016874;GO:0016875;GO:0004812;GO:0016876	K06878	ENOG4108Z7R	J	sp|P37584|CSAA_BACSU|Probable chaperone CsaA OS=Bacillus subtilis (strain 168) OX=224308 GN=csaA PE=1 SV=2	tRNA-binding protein [Bacillus altitudinis] OJT59132.1 tRNA-binding protein [Bacillus altitudinis]
gene1019	0.808473	1.61695	0	0	-Inf	1	1	gi|111111112|ref|scaffold2.1|	43544	44005	+	461	gene1019	GO:0044238;GO:0019538;GO:0043170;GO:0071704;GO:0008152;GO:0006508;GO:0016787;GO:0004175;GO:0004222;GO:0003824;GO:0070011;GO:0008233;GO:0008237	-	ENOG4106GSP	S	sp|P70963|YWMF_BACSU|Uncharacterized membrane protein YwmF OS=Bacillus subtilis (strain 168) OX=224308 GN=ywmF PE=4 SV=1	hypothetical protein [Bacillus pumilus] ANT56892.1 hypothetical protein VP59_08775 [Bacillus pumilus]
gene102	0.142425	0.284851	0	0	-Inf	1	1	gi|111111111|ref|scaffold1.1|	102466	102837	-	371	gene102	GO:0008152;GO:0016787;GO:0003824	K07107	ENOG4108099	S	sp|Q45061|YNEP_BACSU|Putative acyl-CoA thioesterase YneP OS=Bacillus subtilis (strain 168) OX=224308 GN=yneP PE=3 SV=2	acyl- thioesterase [Bacillus stratosphericus LAMA 585]
gene1020	1.55411	3.10822	0	0	-Inf	1	1	gi|111111112|ref|scaffold2.1|	44002	45591	-	1589	gene1020	GO:0016020;GO:0016021;GO:0044464;GO:0005623;GO:0071944;GO:0005886;GO:0044425;GO:0031224	-	ENOG4105FVX	S	sp|O31813|YNDJ_BACSU|Uncharacterized membrane protein YndJ OS=Bacillus subtilis (strain 168) OX=224308 GN=yndJ PE=4 SV=1	hypothetical protein [Bacillus sp. Leaf49] KQU11986.1 hypothetical protein ASG46_05445 [Bacillus sp. Leaf49]
gene1021	0.929954	1.85991	0	0	-Inf	1	1	gi|111111112|ref|scaffold2.1|	45620	46132	-	512	gene1021	-	-	ENOG4108UMC	S	sp|O31812|YNDH_BACSU|Uncharacterized protein YndH OS=Bacillus subtilis (strain 168) OX=224308 GN=yndH PE=4 SV=1	DUF4166 domain-containing protein [Bacillus sp. Leaf49] KQU11987.1 hypothetical protein ASG46_05450 [Bacillus sp. Leaf49]
gene1022	3.81616	7.63232	0	0	-Inf	1	1	gi|111111112|ref|scaffold2.1|	46188	47069	-	881	gene1022	-	-	ENOG4107Z5A	S	sp|O31811|YNDG_BACSU|Uncharacterized membrane protein YndG OS=Bacillus subtilis (strain 168) OX=224308 GN=yndG PE=4 SV=1	hypothetical protein [Bacillus stratosphericus] KOA80593.1 membrane protein [Bacillus stratosphericus]
gene1023	0.548756	1.09751	0	0	-Inf	1	1	gi|111111112|ref|scaffold2.1|	47221	47781	-	560	gene1023	GO:0019222;GO:0031326;GO:0031323;GO:0050789;GO:0080090;GO:2000112;GO:0060255;GO:0065007;GO:0010468;GO:0019219;GO:0009889;GO:0050794;GO:0051171;GO:2001141;GO:0051252;GO:0006355;GO:0010556;GO:0032774;GO:0090304;GO:0044249;GO:0034641;GO:0006807;GO:0034645;GO:1901362;GO:1901360;GO:0006139;GO:0044260;GO:0071704;GO:0010467;GO:0018130;GO:1901576;GO:0006725;GO:0009987;GO:0009058;GO:0009059;GO:0008152;GO:…	-	ENOG4108SPU	K	sp|O34892|YOBS_BACSU|Uncharacterized HTH-type transcriptional regulator YobS OS=Bacillus subtilis (strain 168) OX=224308 GN=yobS PE=4 SV=1	TetR/AcrR family transcriptional regulator [Bacillus altitudinis] KDE30356.1 TetR family transcriptional regulator [Bacillus altitudinis 41KF2b]
gene1024	0.314174	0.628347	0	0	-Inf	1	1	gi|111111112|ref|scaffold2.1|	47797	48516	-	719	gene1024	GO:0008152;GO:0016787;GO:0003824	-	ENOG4108W8B	L	sp|O34910|YOBT_BACSU|Uncharacterized protein YobT OS=Bacillus subtilis (strain 168) OX=224308 GN=yobT PE=3 SV=1	MBL fold metallo-hydrolase [Bacillus altitudinis] OPX01103.1 MBL fold metallo-hydrolase [Bacillus altitudinis]
gene1025	0.0502678	0.100536	0	0	-Inf	1	1	gi|111111112|ref|scaffold2.1|	48555	49031	-	476	gene1025	-	-	ENOG4105WRS	K	sp|O34637|YOBU_BACSU|Putative transcriptional regulator protein YobU OS=Bacillus subtilis (strain 168) OX=224308 GN=yobU PE=4 SV=1	AraC family transcriptional regulator [Bacillus pumilus] AMM89233.1 transcriptional regulator [Bacillus pumilus]
gene1026	0.0544567	0.108913	0	0	-Inf	1	1	gi|111111112|ref|scaffold2.1|	49086	50009	-	923	gene1026	GO:0080090;GO:0019222;GO:0031326;GO:0031323;GO:0050789;GO:2000112;GO:0060255;GO:0065007;GO:0010468;GO:0019219;GO:0009889;GO:0050794;GO:0051171;GO:2001141;GO:0051252;GO:0006355;GO:0010556;GO:0003700;GO:0001071;GO:0044464;GO:0005623;GO:0005622	-	ENOG4107TNU	K	sp|O34920|YOBV_BACSU|Uncharacterized HTH-type transcriptional regulator YobV OS=Bacillus subtilis (strain 168) OX=224308 GN=yobV PE=4 SV=1	transcriptional regulator [Bacillus pumilus] AHL71718.1 transcriptional regulator [Bacillus pumilus]
gene1027	0.0167559	0.0335118	0	0	-Inf	1	1	gi|111111112|ref|scaffold2.1|	50128	50652	+	524	gene1027	-	-	-	-	sp|P94497|CSK22_BACSU|Protein csk22 OS=Bacillus subtilis (strain 168) OX=224308 GN=csk22 PE=2 SV=1	hypothetical protein [Bacillus stratosphericus] KMK99838.1 mother cell-specific membrane sporulation protein [Bacillus stratosphericus] KML55525.1 mother cell-specific membrane sporulation protein [Bacillus stratosphericus]
gene1028	0.0754016	0.150803	0	0	-Inf	1	1	gi|111111112|ref|scaffold2.1|	50688	51017	-	329	gene1028	GO:0032774;GO:0019222;GO:0031326;GO:0031323;GO:0090304;GO:0044249;GO:0034641;GO:0006807;GO:0034645;GO:1901362;GO:0050789;GO:1901360;GO:0080090;GO:0006139;GO:0044260;GO:0071704;GO:2000112;GO:0060255;GO:0010467;GO:0065007;GO:0010468;GO:0018130;GO:1901576;GO:0019219;GO:0006725;GO:0009987;GO:0009889;GO:0050794;GO:0009058;GO:0009059;GO:0051171;GO:0008152;GO:2001141;GO:0034654;GO:0046483;GO:0016070;GO:…	K22043	ENOG4105KTU	K	sp|O31844|CZRA_BACSU|HTH-type transcriptional repressor CzrA OS=Bacillus subtilis (strain 168) OX=224308 GN=czrA PE=1 SV=1	transcriptional regulator [Bacillus pumilus]
gene1029	3.92926	7.85853	0	0	-Inf	1	1	gi|111111112|ref|scaffold2.1|	51274	52530	+	1256	gene1029	GO:0071705;GO:0009987;GO:0055085;GO:0015849;GO:0003333;GO:0006865;GO:0015711;GO:0051179;GO:0044765;GO:0034220;GO:0006820;GO:0044763;GO:0006810;GO:0071702;GO:0051234;GO:0006811;GO:0044699;GO:0046942;GO:0022891;GO:0022892;GO:0005342;GO:0008514;GO:0005215;GO:0008509;GO:0015075;GO:0022857;GO:0015171;GO:0046943;GO:0016020;GO:0044425;GO:0016021;GO:0031224	K14052	ENOG4105MY3	E	sp|P76037|PUUP_ECOLI|Putrescine importer PuuP OS=Escherichia coli (strain K12) OX=83333 GN=puuP PE=1 SV=2	putrescine importer PuuP [Bacillus altitudinis] KWZ67347.1 Putrescine importer PuuP [Bacillus altitudinis]
gene1030	8.90996	17.8199	0	0	-Inf	1	1	gi|111111112|ref|scaffold2.1|	52859	53290	+	431	gene1030	GO:0008152;GO:0003824;GO:0016787	-	ENOG4108FMK	M	sp|O34636|YOCA_BACSU|Uncharacterized membrane protein YocA OS=Bacillus subtilis (strain 168) OX=224308 GN=yocA PE=4 SV=1	lysozyme family protein [Bacillus altitudinis] KDE30363.1 hypothetical protein BA79_13325 [Bacillus altitudinis 41KF2b]
gene1032	71.3551	142.71	0	0	-Inf	1	1	gi|111111112|ref|scaffold2.1|	54256	55698	-	1442	gene1032	GO:0009987;GO:0008152;GO:0044237;GO:0006631;GO:0019752;GO:0044281;GO:0044710;GO:0071704;GO:0019541;GO:0019543;GO:0006629;GO:0032787;GO:0043436;GO:0044255;GO:0044238;GO:0006082;GO:0046459;GO:0044248;GO:0009056;GO:0009062;GO:0044282;GO:0044242;GO:0044712;GO:0016042;GO:0019626;GO:1901575;GO:0072329;GO:0046395;GO:0016054;GO:0019629;GO:0047547;GO:0016836;GO:0003824;GO:0016835;GO:0016829;GO:0051540;GO:…	K01720	ENOG4105DXD	S	sp|P45859|PRPD_BACSU|2-methylcitrate dehydratase OS=Bacillus subtilis (strain 168) OX=224308 GN=prpD PE=1 SV=3	2-methylcitrate dehydratase [Bacillus pumilus] AKC66289.1 2-methylcitrate dehydratase [Bacillus pumilus]
gene1033	127.626	255.251	0	0	-Inf	1	1	gi|111111112|ref|scaffold2.1|	55695	56840	-	1145	gene1033	GO:0009987;GO:0008152;GO:0044237;GO:0044238;GO:0071704;GO:0044262;GO:0005975;GO:0044710;GO:0006091;GO:0055114;GO:0015980;GO:0006099;GO:0009060;GO:0045333;GO:0046912;GO:0003824;GO:0016740;GO:0016746;GO:0004108;GO:0005737;GO:0044464;GO:0005623;GO:0005622;GO:0044424	K01647	ENOG4105BZN	C	sp|P45858|MMGD_BACSU|2-methylcitrate synthase OS=Bacillus subtilis (strain 168) OX=224308 GN=mmgD PE=1 SV=1	citrate synthase 3 [Bacillus sp. M 2-6]
gene1034	3.9544	7.90879	0	0	-Inf	1	1	gi|111111112|ref|scaffold2.1|	57005	57544	-	539	gene1034	GO:0006091;GO:0044699;GO:0044710;GO:0015992;GO:0051179;GO:0022900;GO:0006810;GO:0022904;GO:0015672;GO:0006818;GO:0006812;GO:0006811;GO:0009987;GO:0034220;GO:0044765;GO:0044763;GO:0008152;GO:0051234;GO:0055085;GO:0055114;GO:0015980;GO:0044237;GO:0045333;GO:0004129;GO:0022890;GO:0022891;GO:0022892;GO:0005215;GO:0008324;GO:0022857;GO:0015075;GO:0003824;GO:0015077;GO:0016676;GO:0016675;GO:0015078;GO:…	K08976	ENOG4108SJC	S	sp|O31845|YOZB_BACSU|Uncharacterized membrane protein YozB OS=Bacillus subtilis (strain 168) OX=224308 GN=yozB PE=4 SV=1	integral inner membrane protein [Bacillus stratosphericus LAMA 585]
gene1035	0.142425	0.284851	0	0	-Inf	1	1	gi|111111112|ref|scaffold2.1|	57698	58255	+	557	gene1035	-	-	ENOG4106SUJ	S	sp|O35042|YOCC_BACSU|Uncharacterized protein YocC OS=Bacillus subtilis (strain 168) OX=224308 GN=yocC PE=4 SV=1	carbamoyl-phosphate synthase large subunit [Bacillus stratosphericus LAMA 585]
gene1037	1.0263	2.0526	0	0	-Inf	1	1	gi|111111112|ref|scaffold2.1|	59456	61237	-	1781	gene1037	GO:0008152;GO:0044237;GO:1901360;GO:0046483;GO:0006807;GO:0034641;GO:0006139;GO:0009987;GO:0006725;GO:0071704;GO:0044238;GO:0044260;GO:0043170;GO:0090304;GO:0006259;GO:0044710;GO:0046434;GO:0009166;GO:0009167;GO:0009164;GO:0044281;GO:0009161;GO:0046130;GO:0009169;GO:0009199;GO:0042454;GO:0009207;GO:0009205;GO:0009203;GO:0046034;GO:0046128;GO:1901564;GO:1901565;GO:0009128;GO:0006163;GO:0019637;GO:…	K03654	ENOG4105C9U	L	sp|O34748|RECQ_BACSU|Probable ATP-dependent DNA helicase RecQ OS=Bacillus subtilis (strain 168) OX=224308 GN=recQ PE=3 SV=1	DEAD-box ATP-dependent RNA helicase CshA [Streptococcus pneumoniae]
gene1038	0.213638	0.427276	0	0	-Inf	1	1	gi|111111112|ref|scaffold2.1|	61692	62099	-	407	gene1038	GO:0043169;GO:0046914;GO:0043167;GO:0005488;GO:0046872;GO:0008270	K06204	ENOG4105NHS	K	sp|P80872|G16O_BACSU|General stress protein 16O OS=Bacillus subtilis (strain 168) OX=224308 GN=yocK PE=1 SV=3	general stress protein [Bacillus pumilus] ALM29048.1 general stress protein [Bacillus pumilus] ALM45587.1 general stress protein [Bacillus pumilus] ANY97067.1 general stress protein [Bacillus pumilus]
gene1039	1.19386	2.38772	0	0	-Inf	1	1	gi|111111112|ref|scaffold2.1|	62282	62929	-	647	gene1039	-	-	ENOG4108W5V	M	sp|O07609|YHFK_BACSU|Uncharacterized sugar epimerase YhfK OS=Bacillus subtilis (strain 168) OX=224308 GN=yhfK PE=2 SV=1	NAD(P)-dependent oxidoreductase [Bacillus pumilus] AMM89247.1 NAD-dependent dehydratase [Bacillus pumilus]
gene1040	1.3321	2.66419	0	0	-Inf	1	1	gi|111111112|ref|scaffold2.1|	63107	63469	-	362	gene1040	-	-	ENOG4108AHT	S	sp|O31847|YOZO_BACSU|Uncharacterized protein YozO OS=Bacillus subtilis (strain 168) OX=224308 GN=yozO PE=4 SV=1	PH domain-containing protein [Bacillus sp. nio-1130]
gene1041	0.0125669	0.0251339	0	0	-Inf	1	1	gi|111111112|ref|scaffold2.1|	63726	63869	-	143	gene1041	-	-	-	-	-	Protein of unknown function [Bacillus sp. ru9509.4] SIT89103.1 Protein of unknown function [Bacillus sp. RRD69]
gene1043	140.947	281.893	0	0	-Inf	1	1	gi|111111112|ref|scaffold2.1|	64335	65819	+	1484	gene1043	GO:0008152;GO:0044710;GO:0055114;GO:0009987;GO:0071704;GO:0044237;GO:0044281;GO:0006082;GO:0043436;GO:0019752;GO:0044238;GO:0006807;GO:1901564;GO:0006520;GO:0009056;GO:1901575;GO:0044282;GO:0044712;GO:0044248;GO:0016054;GO:0046395;GO:1901565;GO:0009063;GO:1901605;GO:1901576;GO:0044249;GO:0009058;GO:0009064;GO:1901566;GO:0044283;GO:0044711;GO:0016053;GO:0008652;GO:0046394;GO:1901360;GO:1901606;GO:…	K00128	ENOG4105C26	C	sp|O34660|ALDH4_BACSU|Putative aldehyde dehydrogenase DhaS OS=Bacillus subtilis (strain 168) OX=224308 GN=dhaS PE=3 SV=1	aldehyde dehydrogenase [Bacillus stratosphericus LAMA 585]
gene1044	4.9053	9.81059	0	0	-Inf	1	1	gi|111111112|ref|scaffold2.1|	66040	67995	+	1955	gene1044	GO:0008152;GO:0044710;GO:0071704;GO:0006629;GO:0009987;GO:0044238;GO:0044249;GO:1901362;GO:1901360;GO:0019746;GO:1901576;GO:0016104;GO:0019742;GO:0006722;GO:0019745;GO:0019744;GO:0006721;GO:0006720;GO:0009058;GO:0044255;GO:0008610;GO:0044237;GO:0008299;GO:0016114;GO:0003824;GO:0016866;GO:0016853;GO:0009975;GO:0034072;GO:0051007	K18115	ENOG4105EWU	I	sp|Q796C3|SQHC_BACSU|Sporulenol synthase OS=Bacillus subtilis (strain 168) OX=224308 GN=sqhC PE=1 SV=1	squalene-hopene cyclase [Bacillus stratosphericus LAMA 585]
gene1045	0.0377008	0.0754016	0	0	-Inf	1	1	gi|111111112|ref|scaffold2.1|	68096	68365	+	269	gene1045	GO:0009987;GO:0044710;GO:0055114;GO:0008152;GO:0006801;GO:0072593;GO:0044237;GO:0016491;GO:0016721;GO:0016209;GO:0003824;GO:0004784;GO:0005488;GO:0043167;GO:0043169;GO:0046872	-	ENOG4105CK4	P	sp|O35023|SODF_BACSU|Probable superoxide dismutase [Fe] OS=Bacillus subtilis (strain 168) OX=224308 GN=sodF PE=3 SV=1	superoxide dismutase [Bacillus altitudinis] OJT59157.1 superoxide dismutase [Bacillus altitudinis]
gene1046	0.276473	0.552945	0	0	-Inf	1	1	gi|111111112|ref|scaffold2.1|	68362	68808	+	446	gene1046	GO:0009987;GO:0044710;GO:0055114;GO:0008152;GO:0006801;GO:0072593;GO:0044237;GO:0016491;GO:0016721;GO:0016209;GO:0003824;GO:0004784;GO:0005488;GO:0043167;GO:0043169;GO:0046872	K04564	ENOG4105CK4	P	sp|O35023|SODF_BACSU|Probable superoxide dismutase [Fe] OS=Bacillus subtilis (strain 168) OX=224308 GN=sodF PE=3 SV=1	superoxide dismutase [Bacillus stratosphericus] KMK99854.1 superoxide dismutase [Bacillus stratosphericus] KML51242.1 superoxide dismutase [Bacillus stratosphericus]
gene1047	1.00117	2.00233	0	0	-Inf	1	1	gi|111111112|ref|scaffold2.1|	68960	69910	+	950	gene1047	GO:0044699;GO:0055085;GO:0035725;GO:0015672;GO:0006810;GO:0006812;GO:0006811;GO:0009987;GO:0006814;GO:0034220;GO:0044765;GO:0030001;GO:0051234;GO:0051179;GO:0044763;GO:0006869;GO:0015721;GO:0006820;GO:0015849;GO:0033036;GO:0015718;GO:0015711;GO:0010876;GO:0046942;GO:0071702;GO:0015081;GO:0022857;GO:0015370;GO:0046873;GO:0022804;GO:0015294;GO:0015291;GO:0015293;GO:0005215;GO:0008324;GO:0022891;GO:…	K03453	ENOG4105C09	S	sp|O34524|YOCS_BACSU|Uncharacterized sodium-dependent transporter YocS OS=Bacillus subtilis (strain 168) OX=224308 GN=yocS PE=3 SV=1	sodium-dependent transporter [Bacillus stratosphericus LAMA 585] BAT49006.1 BASS family bile acid:sodium (Na+) symporter [Bacillus pumilus]
gene1048	824.63	1410.54	238.722	0.169241	-2.56285	1	1	gi|111111112|ref|scaffold2.1|	69942	71198	-	1256	gene1048	GO:0008152;GO:0009987;GO:0044237;GO:0044710;GO:0006091;GO:0044238;GO:0055114;GO:0006099;GO:0009060;GO:0045333;GO:0015980;GO:0071704;GO:0019752;GO:0044281;GO:0043436;GO:0006082;GO:0006090;GO:0032787;GO:0016746;GO:0016740;GO:0003824;GO:0016747;GO:0016417;GO:0004149;GO:0016748;GO:0016751;GO:0016407;GO:0030523;GO:0016418;GO:0004742;GO:0005737;GO:0043234;GO:0032991;GO:0044464;GO:0005623;GO:0005622;GO:…	K00658	ENOG4105C7S	C	sp|P16263|ODO2_BACSU|Dihydrolipoyllysine-residue succinyltransferase component of 2-oxoglutarate dehydrogenase complex OS=Bacillus subtilis (strain 168) OX=224308 GN=odhB PE=3 SV=2	dihydrolipoamide succinyltransferase [Bacillus pumilus] ALM29040.1 dihydrolipoamide succinyltransferase [Bacillus pumilus] ALM45579.1 dihydrolipoamide succinyltransferase [Bacillus pumilus] ANY97059.1 dihydrolipoamide succinyltransferase [Bacillus pumilus]
gene1050	8.39891	16.7978	0	0	-Inf	1	1	gi|111111112|ref|scaffold2.1|	74272	76140	-	1868	gene1050	GO:0006200;GO:0044281;GO:1901360;GO:0044710;GO:0046483;GO:1901564;GO:0034641;GO:0006807;GO:0008152;GO:0009987;GO:0006725;GO:0071704;GO:0044237;GO:0046434;GO:0009166;GO:0009167;GO:0009164;GO:0046130;GO:0009169;GO:0009199;GO:0042454;GO:0009207;GO:0009203;GO:0046034;GO:0046128;GO:1901565;GO:0006163;GO:0019637;GO:0009141;GO:0009143;GO:0009144;GO:0009146;GO:0006195;GO:1901575;GO:1901361;GO:0009158;GO:…	-	ENOG4107T89	P	sp|O31849|YOJO_BACSU|Uncharacterized protein YojO OS=Bacillus subtilis (strain 168) OX=224308 GN=yojO PE=3 SV=2	hypothetical protein [Bacillus pumilus] AMB90045.1 hypothetical protein ASM07_09035 [Bacillus pumilus]
gene1051	0.98441	1.96882	0	0	-Inf	1	1	gi|111111112|ref|scaffold2.1|	76200	77078	-	878	gene1051	GO:0006200;GO:0008152;GO:0071704;GO:0044238;GO:0046434;GO:0009166;GO:0009167;GO:0009164;GO:0009161;GO:0046130;GO:0009169;GO:0044710;GO:0009199;GO:0042454;GO:0009207;GO:0009205;GO:0009203;GO:0046034;GO:0046128;GO:0046483;GO:1901564;GO:1901565;GO:0034641;GO:0006163;GO:0019637;GO:0044281;GO:0009141;GO:0009143;GO:0009144;GO:0009146;GO:0006807;GO:0006195;GO:1901575;GO:1901360;GO:1901361;GO:0009158;GO:…	K04748	ENOG4105GMT	S	sp|O31850|YOJN_BACSU|Uncharacterized protein YojN OS=Bacillus subtilis (strain 168) OX=224308 GN=yojN PE=3 SV=1	MoxR family ATPase [Bacillus stratosphericus] EMI11959.1 nitric-oxide reductase [Bacillus stratosphericus LAMA 585]
gene1052	0.222016	0.444032	0	0	-Inf	1	1	gi|111111112|ref|scaffold2.1|	77168	77746	-	578	gene1052	GO:0008152;GO:0055114;GO:0006801;GO:0044710;GO:0009987;GO:0072593;GO:0044237;GO:0043169;GO:0043167;GO:0005488;GO:0046872;GO:0016721;GO:0016209;GO:0003824;GO:0004784;GO:0016491;GO:0005623;GO:0044464;GO:0042597	K04565	ENOG4108Z7T	P	sp|O31851|YOJM_BACSU|Superoxide dismutase-like protein YojM OS=Bacillus subtilis (strain 168) OX=224308 GN=yojM PE=1 SV=1	superoxide dismutase [Bacillus stratosphericus] OQP22606.1 superoxide dismutase [Bacillus stratosphericus]
gene1054	0.167559	0.335118	0	0	-Inf	1	1	gi|111111112|ref|scaffold2.1|	79559	80185	-	626	gene1054	-	K18672	ENOG4107Y0Y	S	sp|O31854|CDAS_BACSU|Cyclic di-AMP synthase CdaS OS=Bacillus subtilis (strain 168) OX=224308 GN=cdaS PE=1 SV=3	hypothetical protein [Bacillus sp. Leaf49] KQU12016.1 hypothetical protein ASG46_05610 [Bacillus sp. Leaf49]
gene1056	1.00536	2.01071	0	0	-Inf	1	1	gi|111111112|ref|scaffold2.1|	80449	81819	+	1370	gene1056	GO:0044763;GO:0044699;GO:0009987;GO:0050896;GO:0042221;GO:0006810;GO:0051234;GO:0055085;GO:0044765;GO:0051179;GO:0042493;GO:0015893;GO:0006855;GO:0006811;GO:0006812;GO:0006814;GO:0015672;GO:0030001;GO:0005215;GO:0022857;GO:0015238;GO:0090484;GO:0022804;GO:0015297;GO:0015291;GO:0016020;GO:0016021;GO:0044425;GO:0031224;GO:0044464;GO:0005623;GO:0071944;GO:0005886	K03327	ENOG4107QI1	V	sp|O31855|NORM_BACSU|Probable multidrug resistance protein NorM OS=Bacillus subtilis (strain 168) OX=224308 GN=norM PE=3 SV=1	mate family multi antimicrobial extrusion protein [Bacillus sp. M 2-6] KIL28293.1 hypothetical protein B4133_2104 [Bacillus pumilus] SCC24849.1 multidrug resistance protein, MATE family [Bacillus sp. nio-1130]
gene1057	0.12148	0.242961	0	0	-Inf	1	1	gi|111111112|ref|scaffold2.1|	81841	82506	-	665	gene1057	-	K22135	ENOG4106FD8	S	sp|O31857|BSHB2_BACSU|Probable N-acetyl-alpha-D-glucosaminyl L-malate deacetylase 2 OS=Bacillus subtilis (strain 168) OX=224308 GN=bshB2 PE=3 SV=2	hypothetical protein BAME_26990 [Bacillus sp. M 2-6] BAT49016.1 deacetylase [Bacillus pumilus]
gene1058	0.402142	0.804284	0	0	-Inf	1	1	gi|111111112|ref|scaffold2.1|	82524	82874	-	350	gene1058	-	-	ENOG4105KQA	S	sp|O31858|YOJF_BACSU|Uncharacterized protein YojF OS=Bacillus subtilis (strain 168) OX=224308 GN=yojF PE=1 SV=1	hypothetical protein [Bacillus aerophilus]
gene1059	0.293229	0.586457	0	0	-Inf	1	1	gi|111111112|ref|scaffold2.1|	82871	83152	-	281	gene1059	-	-	-	-	sp|O68260|YOYC_BACSU|Uncharacterized protein YoyC OS=Bacillus subtilis (strain 168) OX=224308 GN=yoyC PE=4 SV=1	hypothetical protein [Bacillus pumilus] AMB90052.1 hypothetical protein ASM07_09075 [Bacillus pumilus]
gene106	1.12265	2.24529	0	0	-Inf	1	1	gi|111111111|ref|scaffold1.1|	103647	104150	-	503	gene106	GO:0055114;GO:0044710;GO:0008152;GO:0042592;GO:0050789;GO:0044699;GO:0065007;GO:0065008;GO:0019725;GO:0009987;GO:0050794;GO:0044763;GO:0045454;GO:0071704;GO:0018904;GO:0044281;GO:0006662;GO:0016491;GO:0003824;GO:0016209;GO:0016667;GO:0015036;GO:0009055;GO:0015035	-	ENOG4105KJP	O	sp|O31820|YNEN_BACSU|Thioredoxin-like protein YneN OS=Bacillus subtilis (strain 168) OX=224308 GN=yneN PE=3 SV=1	thiol:disulfide interchange protein tlpA [Bacillus stratosphericus] KML05663.1 thiol:disulfide interchange protein tlpA [Bacillus stratosphericus] KML57223.1 thiol:disulfide interchange protein tlpA [Bacillus stratosphericus]
gene1060	1.42844	2.85688	0	0	-Inf	1	1	gi|111111112|ref|scaffold2.1|	83231	84142	-	911	gene1060	GO:0006810;GO:0051234;GO:0051179;GO:0005215;GO:0016020;GO:0044464;GO:0005623;GO:0071944;GO:0005886;GO:0016021;GO:0044425;GO:0031224;GO:0044459;GO:0005887;GO:0031226	K05786	ENOG4105FR1	S	sp|O31859|YOJE_BACSU|Uncharacterized transporter YojE OS=Bacillus subtilis (strain 168) OX=224308 GN=yojE PE=3 SV=2	transporter [Bacillus stratosphericus] KML51254.1 transporter [Bacillus stratosphericus] KQU12021.1 transporter [Bacillus sp. Leaf49] KWZ66901.1 transporter [Bacillus altitudinis]
gene1061	0.0125669	0.0251339	0	0	-Inf	1	1	gi|111111112|ref|scaffold2.1|	84220	84702	+	482	gene1061	-	K13993	-	-	sp|Q7WY67|GERT_BACSU|Spore germination protein GerT OS=Bacillus subtilis (strain 168) OX=224308 GN=gerT PE=1 SV=1	spore coat protein [Bacillus stratosphericus LAMA 585]
gene1062	0.0795906	0.159181	0	0	-Inf	1	1	gi|111111112|ref|scaffold2.1|	84743	84982	-	239	gene1062	-	-	-	-	-	hypothetical protein [Bacillus xiamenensis] EKF34717.1 hypothetical protein BA1_13873 [Bacillus xiamenensis] AOZ90361.1 hypothetical protein BK049_17545 [Bacillus xiamenensis]
gene1063	0.230394	0.460788	0	0	-Inf	1	1	gi|111111112|ref|scaffold2.1|	85037	85369	-	332	gene1063	GO:0097159;GO:0005488;GO:0032934;GO:0043178;GO:0008289;GO:0036094;GO:0005496	-	ENOG4105F63	K	sp|O34844|YODB_BACSU|HTH-type transcriptional regulator YodB OS=Bacillus subtilis (strain 168) OX=224308 GN=yodB PE=1 SV=1	transcriptional repressor [Bacillus stratosphericus LAMA 585]
gene1064	0.309985	0.619969	0	0	-Inf	1	1	gi|111111112|ref|scaffold2.1|	85511	86128	+	617	gene1064	GO:0055114;GO:0044710;GO:0008152;GO:0003824;GO:0016491	-	ENOG4108TVJ	C	sp|P81102|YODC_BACSU|Putative NAD(P)H nitroreductase YodC OS=Bacillus subtilis (strain 168) OX=224308 GN=yodC PE=1 SV=3	nitroreductase family protein [Bacillus stratosphericus] EMI11970.1 oxidoreductase [Bacillus stratosphericus LAMA 585]
gene1065	0.800095	1.60019	0	0	-Inf	1	1	gi|111111112|ref|scaffold2.1|	86569	88062	+	1493	gene1065	GO:0006810;GO:0009987;GO:0055085;GO:0044765;GO:0044763;GO:0051234;GO:0051179;GO:0044699;GO:0005215;GO:0016020;GO:0016021;GO:0044425;GO:0031224	K03307	ENOG4105E1V	E	sp|O34745|YODF_BACSU|Uncharacterized symporter YodF OS=Bacillus subtilis (strain 168) OX=224308 GN=yodF PE=2 SV=1	symporter [Bacillus altitudinis] OJT59174.1 symporter [Bacillus altitudinis]
gene1067	0.196882	0.393764	0	0	-Inf	1	1	gi|111111112|ref|scaffold2.1|	89845	90543	+	698	gene1067	GO:0032259;GO:0008152;GO:0003824;GO:0016740;GO:0016741;GO:0008168	-	ENOG41079VY	Q	sp|O34954|YODH_BACSU|Uncharacterized methyltransferase YodH OS=Bacillus subtilis (strain 168) OX=224308 GN=yodH PE=3 SV=1	SAM-dependent methyltransferase [Bacillus pumilus] BAT49027.1 S-adenosylmethionine-dependent methyltransferase [Bacillus pumilus]
gene1068	0.00418898	0.00837796	0	0	-Inf	1	1	gi|111111112|ref|scaffold2.1|	90636	90899	+	263	gene1068	-	-	ENOG41077IP	S	sp|O34654|YODI_BACSU|Uncharacterized protein YodI OS=Bacillus subtilis (strain 168) OX=224308 GN=yodI PE=4 SV=1	hypothetical protein [Bacillus pumilus]
gene1069	1.04306	2.08611	0	0	-Inf	1	1	gi|111111112|ref|scaffold2.1|	90949	91779	-	830	gene1069	GO:0071704;GO:0008152;GO:0044238;GO:0043170;GO:0006508;GO:0019538;GO:0016787;GO:0003824;GO:0008233;GO:0004180;GO:0008238;GO:0070011;GO:0009002;GO:0004185;GO:0017171;GO:0070008;GO:0008236	K07260	ENOG4108VXD	M	sp|O34866|YODJ_BACSU|Putative carboxypeptidase YodJ OS=Bacillus subtilis (strain 168) OX=224308 GN=yodJ PE=1 SV=1	peptidase M15 [Bacillus pumilus] AMB90063.1 peptidase M15 [Bacillus pumilus]
gene1070	2.02328	4.04655	0	0	-Inf	1	1	gi|111111112|ref|scaffold2.1|	91848	92543	-	695	gene1070	GO:0009987;GO:0009116;GO:0034641;GO:0006807;GO:1901360;GO:0006139;GO:0071704;GO:0006725;GO:0008152;GO:0046483;GO:0044238;GO:0044237;GO:0044281;GO:0044710;GO:0055086;GO:1901564;GO:1901135;GO:1901657;GO:0072521;GO:0042278;GO:0003824;GO:0016740;GO:0016763;GO:0016757;GO:0004731	K03784	ENOG4105D3A	F	sp|Q65IE9|DEOD_BACLD|Purine nucleoside phosphorylase DeoD-type OS=Bacillus licheniformis (strain ATCC 14580 / DSM 13 / JCM 2505 / NBRC 12200 /NCIMB 9375 / NRRL NRS-1264 / Gibson 46) OX=279010 GN=deoD PE=3 SV=1	purine nucleoside phosphorylase DeoD-type [Bacillus altitudinis] KLV20579.1 purine nucleoside phosphorylase DeoD-type [Bacillus altitudinis]
gene1071	0.578079	1.15616	0	0	-Inf	1	1	gi|111111112|ref|scaffold2.1|	92654	92971	-	317	gene1071	-	-	ENOG4106Z5R	S	sp|O30472|YODL_BACSU|Uncharacterized protein YodL OS=Bacillus subtilis (strain 168) OX=224308 GN=yodL PE=4 SV=3	hypothetical protein [Bacillus pumilus] KIL28309.1 hypothetical protein B4133_2120 [Bacillus pumilus]
gene1072	0.364441	0.728883	0	0	-Inf	1	1	gi|111111112|ref|scaffold2.1|	93026	93586	-	560	gene1072	GO:0008152;GO:0003824;GO:0016787;GO:0016020	-	ENOG4107YJ2	I	sp|O34349|PGPB_BACSU|Phosphatidylglycerophosphatase B OS=Bacillus subtilis (strain 168) OX=224308 GN=pgpB PE=1 SV=1	phosphatase [Bacillus pumilus]
gene1076	0.360252	0.720505	0	0	-Inf	1	1	gi|111111112|ref|scaffold2.1|	94935	95135	-	200	gene1076	GO:0008152;GO:0016787;GO:0008238;GO:0004180;GO:0003824;GO:0070011;GO:0008233	-	ENOG4105VSD	S	sp|A8FE93|Y1890_BACP2|UPF0346 protein BPUM_1890 OS=Bacillus pumilus (strain SAFR-032) OX=315750 GN=BPUM_1890 PE=3 SV=1	YozE family protein [Bacillus pumilus] KML12886.1 hypothetical protein VL07_01150 [Bacillus pumilus] KML50341.1 hypothetical protein VL18_12865 [Bacillus pumilus] KMN78815.1 hypothetical protein VK99_13350 [Bacillus pumilus]
gene1077	0.242961	0.485922	0	0	-Inf	1	1	gi|111111112|ref|scaffold2.1|	95239	95388	-	149	gene1077	-	-	-	-	sp|C0H434|YOKU_BACSU|Uncharacterized protein YokU OS=Bacillus subtilis (strain 168) OX=224308 GN=yokU PE=4 SV=1	YokU family protein [Bacillus australimaris] KPN15309.1 hypothetical protein AKG37_00400 [Bacillus australimaris]
gene1078	3.74076	7.48152	0	0	-Inf	1	1	gi|111111112|ref|scaffold2.1|	95523	96929	-	1406	gene1078	GO:0008152;GO:0003824;GO:0005488;GO:0051536;GO:0051540;GO:0016853;GO:0016869;GO:0016866;GO:0070283;GO:0050066	K01843	ENOG4105CK3	E	sp|O34676|KAMA_BACSU|L-lysine 2,3-aminomutase OS=Bacillus subtilis (strain 168) OX=224308 GN=kamA PE=1 SV=1	L-lysine 2,3-aminomutase [Bacillus stratosphericus LAMA 585]
gene1079	2.57203	5.14407	0	0	-Inf	1	1	gi|111111112|ref|scaffold2.1|	97040	98212	-	1172	gene1079	GO:0006355;GO:0080090;GO:0019222;GO:0060255;GO:2001141;GO:0050789;GO:0065007;GO:0009889;GO:0050794;GO:0008152;GO:0010556;GO:0051252;GO:0031326;GO:0031323;GO:2000112;GO:0010468;GO:0019219;GO:0051171;GO:0009987;GO:0071704;GO:0044238;GO:0044237;GO:0006807;GO:0044260;GO:0043170;GO:1901362;GO:0046483;GO:0019438;GO:1901576;GO:1901360;GO:0018130;GO:0034654;GO:0016070;GO:0044271;GO:0006351;GO:0032774;GO:…	K06714	ENOG4108JUB	K	sp|P38022|ROCR_BACSU|Arginine utilization regulatory protein RocR OS=Bacillus subtilis (strain 168) OX=224308 GN=rocR PE=1 SV=2	sigma-54-dependent Fis family transcriptional regulator [Bacillus sp. UNC125MFCrub1.1]
gene108	0.00837796	0.0167559	0	0	-Inf	1	1	gi|111111111|ref|scaffold1.1|	107167	107313	+	146	gene108	GO:0032502;GO:0000003;GO:0019954;GO:0043934;GO:0044767;GO:0030436;GO:0044699;GO:0009987;GO:0048869;GO:0030154;GO:0030435;GO:0044763;GO:0048646;GO:0009653;GO:0048856;GO:0042601;GO:0044464;GO:0042763;GO:0005623	K06432	ENOG410746C	M	sp|A8FDQ9|SSPO_BACP2|Small, acid-soluble spore protein O OS=Bacillus pumilus (strain SAFR-032) OX=315750 GN=sspO PE=3 SV=1	small acid-soluble spore protein O [Bacillus pumilus] EDW22892.1 small, acid-soluble spore protein O [Bacillus pumilus ATCC 7061] KMY19530.1 small, acid-soluble spore protein O [Bacillus pumilus] AOC56626.1 small acid-soluble spore protein O [Bacillus pumilus]
gene1080	0.0963465	0.192693	0	0	-Inf	1	1	gi|111111112|ref|scaffold2.1|	98572	99861	-	1289	gene1080	GO:0008152;GO:0003824;GO:0016740	K06322	ENOG4107QDU	M	sp|P42092|CGED_BACSU|Protein CgeD OS=Bacillus subtilis (strain 168) OX=224308 GN=cgeD PE=4 SV=1	spore maturation protein [Bacillus sp. UNC125MFCrub1.1]
gene1082	0.00418898	0.00837796	0	0	-Inf	1	1	gi|111111112|ref|scaffold2.1|	100414	100815	+	401	gene1082	-	K06319	-	-	sp|P42089|CGEA_BACSU|Protein CgeA OS=Bacillus subtilis (strain 168) OX=224308 GN=cgeA PE=4 SV=1	hypothetical protein [Bacillus pumilus] KIL28321.1 hypothetical protein B4133_2132 [Bacillus pumilus] APP16807.1 hypothetical protein BS467_14145 [Bacillus pumilus]
gene1083	0.0125669	0.0251339	0	0	-Inf	1	1	gi|111111112|ref|scaffold2.1|	100831	101793	+	962	gene1083	-	K06320	ENOG41084P8	S	sp|P42090|CGEB_BACSU|Protein CgeB OS=Bacillus subtilis (strain 168) OX=224308 GN=cgeB PE=4 SV=2	spore maturation protein [Bacillus pumilus] AHL71770.1 CgeB [Bacillus pumilus]
gene1084	0.0795906	0.159181	0	0	-Inf	1	1	gi|111111112|ref|scaffold2.1|	101822	102517	-	695	gene1084	GO:0044249;GO:0034645;GO:0033692;GO:1901576;GO:0044264;GO:0044262;GO:0044260;GO:0016051;GO:0071704;GO:0009987;GO:0000271;GO:0034637;GO:0009058;GO:0009059;GO:0008152;GO:0044723;GO:0044238;GO:0005975;GO:0005976;GO:0044237;GO:0043170;GO:0009103;GO:0006629;GO:0044710;GO:0044255;GO:0008610;GO:0008653;GO:1901137;GO:1901135;GO:0016740;GO:0003824;GO:0016779;GO:0016772;GO:0070567;GO:0008781	-	ENOG4105F0R	M	sp|Q57140|NEUA_HAEIN|Probable N-acylneuraminate cytidylyltransferase OS=Haemophilus influenzae (strain ATCC 51907 / DSM 11121 / KW20 / Rd) OX=71421 GN=neuA PE=3 SV=1	N-acylneuraminate cytidylyltransferase [Bacillus pumilus] BAT49044.1 N-acylneuraminate cytidylyltransferase [Bacillus pumilus] ANT56950.1 acylneuraminate cytidylyltransferase [Bacillus pumilus]
gene1085	0.393764	0.787528	0	0	-Inf	1	1	gi|111111112|ref|scaffold2.1|	102777	103826	+	1049	gene1085	GO:0009058;GO:0008152;GO:0044710;GO:0071704;GO:0044238;GO:0005975;GO:1901576;GO:0016051;GO:0000271;GO:0009059;GO:0044723;GO:0005976;GO:0043170;GO:0044262;GO:0009987;GO:0044237;GO:0044249;GO:0034645;GO:0033692;GO:0009103;GO:0044264;GO:0044260;GO:0006629;GO:0034637;GO:0044255;GO:0008610;GO:0008653;GO:1901137;GO:1901135;GO:0003824;GO:0016853;GO:0016857;GO:0016854;GO:0003978	K15894	ENOG4105C5E	M	sp|Q58461|Y1061_METJA|Uncharacterized membrane protein MJ1061 OS=Methanocaldococcus jannaschii (strain ATCC 43067 / DSM 2661 / JAL-1 / JCM 10045/ NBRC 100440) OX=243232 GN=MJ1061 PE=3 SV=1	polysaccharide biosynthesis protein [Bacillus stratosphericus LAMA 585]
gene1086	0.837796	1.67559	0	0	-Inf	1	1	gi|111111112|ref|scaffold2.1|	103879	104310	-	431	gene1086	GO:0044710;GO:0008152;GO:0055114;GO:0016491;GO:0016667;GO:0003824;GO:0016671;GO:0033743;GO:0043169;GO:0043167;GO:0046872;GO:0008113;GO:0005488;GO:0008270;GO:0046914	K07305	ENOG4105E0X	O	sp|A8FEA3|MSRB_BACP2|Peptide methionine sulfoxide reductase MsrB OS=Bacillus pumilus (strain SAFR-032) OX=315750 GN=msrB PE=3 SV=1	peptide-methionine (R)-S-oxide reductase [Bacillus pumilus] AKU32666.1 peptide methionine sulfoxide reductase [Bacillus pumilus]
gene1087	0.0544567	0.108913	0	0	-Inf	1	1	gi|111111112|ref|scaffold2.1|	104310	104843	-	533	gene1087	GO:0044710;GO:0008152;GO:0055114;GO:0044238;GO:0044260;GO:0044267;GO:0019538;GO:0009987;GO:0006464;GO:0043170;GO:0071704;GO:0043412;GO:0036211;GO:0044237;GO:0008113;GO:0003824;GO:0016671;GO:0016667;GO:0016491	K07304	ENOG4108HW8	O	sp|A8FEA4|MSRA_BACP2|Peptide methionine sulfoxide reductase MsrA OS=Bacillus pumilus (strain SAFR-032) OX=315750 GN=msrA PE=3 SV=1	peptide-methionine (S)-S-oxide reductase [Bacillus pumilus] ANT56953.1 methionine sulfoxide reductase A [Bacillus pumilus]
gene1088	0.0754016	0.150803	0	0	-Inf	1	1	gi|111111112|ref|scaffold2.1|	105000	105413	+	413	gene1088	GO:0019222;GO:0031326;GO:0031323;GO:0050789;GO:0080090;GO:2000112;GO:0060255;GO:0065007;GO:0010468;GO:0019219;GO:0009889;GO:0050794;GO:0051171;GO:2001141;GO:0051252;GO:0006355;GO:0010556;GO:0032774;GO:0090304;GO:0044249;GO:0034641;GO:0006807;GO:0034645;GO:1901362;GO:1901360;GO:0006139;GO:0044260;GO:0071704;GO:0010467;GO:0018130;GO:1901576;GO:0006725;GO:0009987;GO:0009058;GO:0009059;GO:0008152;GO:…	-	ENOG41067TZ	K	sp|P54182|YPOP_BACSU|Uncharacterized HTH-type transcriptional regulator YpoP OS=Bacillus subtilis (strain 168) OX=224308 GN=ypoP PE=4 SV=1	MarR family transcriptional regulator [Bacillus safensis] OUK96993.1 MarR family transcriptional regulator [Bacillus safensis]
gene1089	0.0837796	0.167559	0	0	-Inf	1	1	gi|111111112|ref|scaffold2.1|	105466	105726	+	260	gene1089	-	-	ENOG4106642	S	-	hypothetical protein [Bacillus pumilus] AMM89292.1 DNA alkylation repair protein [Bacillus pumilus]
gene1090	0.196882	0.393764	0	0	-Inf	1	1	gi|111111112|ref|scaffold2.1|	105862	106512	+	650	gene1090	-	-	-	-	-	hypothetical protein [Bacillus pumilus] AKU32670.1 hypothetical protein ID12_15080 [Bacillus pumilus]
gene1091	0.0335118	0.0670237	0	0	-Inf	1	1	gi|111111112|ref|scaffold2.1|	106701	106898	-	197	gene1091	-	-	-	-	sp|P54180|YPMT_BACSU|Uncharacterized protein YpmT OS=Bacillus subtilis (strain 168) OX=224308 GN=ypmT PE=4 SV=1	hypothetical protein [Bacillus australimaris] KPN15324.1 hypothetical protein AKG37_00475 [Bacillus australimaris]
gene1092	2.44636	4.89273	0	0	-Inf	1	1	gi|111111112|ref|scaffold2.1|	106923	107489	-	566	gene1092	-	-	ENOG4105QZP	S	sp|P54179|YPMS_BACSU|Uncharacterized protein YpmS OS=Bacillus subtilis (strain 168) OX=224308 GN=ypmS PE=4 SV=1	hypothetical protein [Bacillus altitudinis] OJT59198.1 hypothetical protein BFP48_11350 [Bacillus altitudinis]
gene1093	7.02911	14.0582	0	0	-Inf	1	1	gi|111111112|ref|scaffold2.1|	107499	108314	-	815	gene1093	GO:0008152;GO:0003824;GO:0016787	-	ENOG4107P8P	S	sp|P40766|YPMR_BACSU|Uncharacterized protein YpmR OS=Bacillus subtilis (strain 168) OX=224308 GN=ypmR PE=4 SV=2	hypothetical protein [Bacillus stratosphericus]
gene1094	2.55109	5.10218	0	0	-Inf	1	1	gi|111111112|ref|scaffold2.1|	108330	108926	-	596	gene1094	-	K07152	ENOG4105EBS	S	sp|P54178|SCO1_BACSU|SCO1 protein homolog OS=Bacillus subtilis (strain 168) OX=224308 GN=ypmQ PE=1 SV=2	cytochrome c oxidase assembly protein [Bacillus pumilus] APP16795.1 cytochrome c oxidase assembly protein [Bacillus pumilus]
gene1095	3.347	6.69399	0	0	-Inf	1	1	gi|111111112|ref|scaffold2.1|	108943	109629	-	686	gene1095	-	-	ENOG4108RCR	S	sp|Q5HFZ8|Y1460_STAAC|DegV domain-containing protein SACOL1460 OS=Staphylococcus aureus (strain COL) OX=93062 GN=SACOL1460 PE=3 SV=1	family edd domain-containing protein [Bacillus stratosphericus LAMA 585]
gene1096	1.92274	3.84548	0	0	-Inf	1	1	gi|111111112|ref|scaffold2.1|	109973	110194	-	221	gene1096	-	-	ENOG4106XD8	S	sp|P54177|YPMP_BACSU|Uncharacterized protein YpmP OS=Bacillus subtilis (strain 168) OX=224308 GN=ypmP PE=4 SV=1	hypothetical protein B4133_2146 [Bacillus pumilus]
gene1097	2.24529	4.49059	0	0	-Inf	1	1	gi|111111112|ref|scaffold2.1|	110261	111529	-	1268	gene1097	GO:0008152;GO:0019752;GO:0006807;GO:0044281;GO:0044710;GO:0006520;GO:0071704;GO:0044238;GO:0009987;GO:0043436;GO:1901564;GO:0006082;GO:0044237;GO:1901605;GO:0044249;GO:0044283;GO:1901576;GO:0044711;GO:1901607;GO:0009058;GO:0008652;GO:1901566;GO:0046394;GO:0016053;GO:0006549;GO:0009097;GO:0009081;GO:0009082;GO:0009066;GO:0006566;GO:0006567;GO:0009063;GO:0044282;GO:0009068;GO:1901606;GO:0044712;GO:…	K01754	ENOG4105C7B	E	sp|P37946|ILVA_BACSU|L-threonine dehydratase biosynthetic IlvA OS=Bacillus subtilis (strain 168) OX=224308 GN=ilvA PE=3 SV=1	threonine dehydratase [Bacillus stratosphericus LAMA 585]
gene1098	9.36656	18.7331	0	0	-Inf	1	1	gi|111111112|ref|scaffold2.1|	111710	112678	+	968	gene1098	GO:0006355;GO:0080090;GO:0019222;GO:0060255;GO:2001141;GO:0050789;GO:0065007;GO:0009889;GO:0050794;GO:0008152;GO:0010556;GO:0051252;GO:0031326;GO:0031323;GO:2000112;GO:0010468;GO:0019219;GO:0051171;GO:0009987;GO:0071704;GO:0044238;GO:0044237;GO:0006807;GO:0044260;GO:0043170;GO:1901362;GO:0046483;GO:0019438;GO:1901576;GO:1901360;GO:0018130;GO:0034654;GO:0016070;GO:0044271;GO:0006351;GO:0032774;GO:…	-	ENOG4108JUB	K	sp|P54156|YPLP_BACSU|Putative sigma L-dependent transcriptional regulator YplP OS=Bacillus subtilis (strain 168) OX=224308 GN=yplP PE=4 SV=1	Fis family transcriptional regulator [Bacillus altitudinis] KDE30430.1 sigma L dependent transcriptional regulator [Bacillus altitudinis 41KF2b]
gene1099	1.11846	2.23692	0	0	-Inf	1	1	gi|111111112|ref|scaffold2.1|	112842	113327	+	485	gene1099	GO:0016265;GO:0019835;GO:0009987;GO:0044763;GO:0008219;GO:0044699;GO:0016020;GO:0016021;GO:0044425;GO:0031224	K11068	ENOG4108UT2	S	sp|P54175|HLY3_BACSU|Hemolysin-3 homolog OS=Bacillus subtilis (strain 168) OX=224308 GN=yplQ PE=3 SV=1	hemolysin D [Bacillus xiamenensis] EKF35602.1 hemolysin III [Bacillus xiamenensis] AOZ90325.1 hemolysin D [Bacillus xiamenensis]
gene11	0.154992	0.309985	0	0	-Inf	1	1	gi|111111111|ref|scaffold1.1|	11501	12997	-	1496	gene11	GO:0009847;GO:0032502;GO:0016020;GO:0016021;GO:0044425;GO:0031224	K06295	ENOG4105E1K	S	sp|Q93LK9|GERQA_BACCE|Spore germination protein GerQA OS=Bacillus cereus OX=1396 GN=gerQA PE=3 SV=1	spore germination protein [Bacillus pumilus]
gene110	0.0837796	0.167559	0	0	-Inf	1	1	gi|111111111|ref|scaffold1.1|	107556	107969	+	413	gene110	-	K06335	-	-	sp|Q45058|COTM_BACSU|Spore coat protein M OS=Bacillus subtilis (strain 168) OX=224308 GN=cotM PE=2 SV=1	spore coat protein [Bacillus stratosphericus LAMA 585]
gene1100	8.90577	17.8115	0	0	-Inf	1	1	gi|111111112|ref|scaffold2.1|	113366	113878	-	512	gene1100	-	K00655	-	-	sp|P54174|YPKP_BACSU|Uncharacterized protein YpkP OS=Bacillus subtilis (strain 168) OX=224308 GN=ypkP PE=4 SV=2	acyltransferase [Bacillus stratosphericus] EMI11998.1 acyltransferase [Bacillus stratosphericus LAMA 585]
gene1101	5.53364	11.0673	0	0	-Inf	1	1	gi|111111112|ref|scaffold2.1|	114009	114497	-	488	gene1101	GO:0008152;GO:0044710;GO:0009987;GO:0044237;GO:0019752;GO:0043436;GO:0044281;GO:1901360;GO:0071704;GO:0006520;GO:1901605;GO:0044238;GO:0006725;GO:0009058;GO:1901564;GO:0046483;GO:0006082;GO:0044249;GO:0006807;GO:0034641;GO:0044283;GO:1901576;GO:1901362;GO:0055114;GO:1901566;GO:1901607;GO:0018130;GO:0044711;GO:0008652;GO:0044271;GO:0046394;GO:0016053;GO:0019438;GO:1901293;GO:0009165;GO:0009069;GO:…	K00287	ENOG4108YYV	H	sp|P11045|DYR_BACSU|Dihydrofolate reductase OS=Bacillus subtilis (strain 168) OX=224308 GN=dfrA PE=1 SV=2	dihydrofolate reductase [Bacillus aerophilus]
gene1102	5.42473	10.8495	0	0	-Inf	1	1	gi|111111112|ref|scaffold2.1|	114494	115297	-	803	gene1102	GO:0008152;GO:0032259;GO:0009165;GO:0044281;GO:1901362;GO:1901360;GO:0044710;GO:0046483;GO:0019637;GO:0019438;GO:0006807;GO:1901576;GO:0018130;GO:0006139;GO:0009263;GO:0009262;GO:0009265;GO:0034654;GO:0090407;GO:0044271;GO:1901293;GO:0006753;GO:0044249;GO:0034641;GO:0009394;GO:0046385;GO:0009987;GO:0006725;GO:0055086;GO:1901137;GO:1901135;GO:0071704;GO:0009058;GO:0009117;GO:0044238;GO:0044237;GO:…	K00560	ENOG4105C0V	F	sp|A8FEB9|TYSY_BACP2|Thymidylate synthase OS=Bacillus pumilus (strain SAFR-032) OX=315750 GN=thyA PE=3 SV=1	thymidylate synthase [Bacillus stratosphericus LAMA 585]
gene1103	0.636725	1.27345	0	0	-Inf	1	1	gi|111111112|ref|scaffold2.1|	115402	115914	-	512	gene1103	GO:0044238;GO:0044710;GO:0006629;GO:0016311;GO:0009987;GO:0044237;GO:0071704;GO:0006796;GO:0008152;GO:0006793;GO:0016787;GO:0016791;GO:0008962;GO:0016788;GO:0042578;GO:0003824	K01095	ENOG4108W5N	I	sp|P54173|YPJQ_BACSU|Uncharacterized protein YpjQ OS=Bacillus subtilis (strain 168) OX=224308 GN=ypjQ PE=1 SV=1	phosphatidylglycerophosphatase a [Bacillus stratosphericus LAMA 585]
gene1104	6.45103	12.9021	0	0	-Inf	1	1	gi|111111112|ref|scaffold2.1|	115948	116565	-	617	gene1104	-	-	ENOG4105QBF	S	sp|P54172|YPJP_BACSU|Uncharacterized protein YpjP OS=Bacillus subtilis (strain 168) OX=224308 GN=ypjP PE=4 SV=1	hypothetical protein [Bacillus altitudinis] KLV20609.1 hypothetical protein ABW03_13675 [Bacillus altitudinis]
gene1105	2.13219	4.26438	0	0	-Inf	1	1	gi|111111112|ref|scaffold2.1|	116832	117629	-	797	gene1105	GO:0032259;GO:0008152;GO:0003824;GO:0016740;GO:0016741;GO:0008168	-	ENOG4107YX5	Q	sp|P54171|YPIP_BACSU|Uncharacterized protein YpiP OS=Bacillus subtilis (strain 168) OX=224308 GN=ypiP PE=4 SV=2	methyltransferase [Bacillus stratosphericus] EMI12003.1 methyltransferase [Bacillus stratosphericus LAMA 585]
gene1106	0.238772	0.477544	0	0	-Inf	1	1	gi|111111112|ref|scaffold2.1|	117695	118123	-	428	gene1106	-	-	ENOG4108Y6J	S	sp|P54170|YPHP_BACSU|UPF0403 protein YphP OS=Bacillus subtilis (strain 168) OX=224308 GN=yphP PE=1 SV=1	YphP protein [Bacillus stratosphericus LAMA 585]
gene1107	9.41683	18.8337	0	0	-Inf	1	1	gi|111111112|ref|scaffold2.1|	118211	119887	-	1676	gene1107	GO:0008152;GO:0044710;GO:0044281;GO:0071704;GO:0009987;GO:0044238;GO:0044237;GO:0009082;GO:0019752;GO:1901564;GO:0006807;GO:0044283;GO:1901576;GO:0044711;GO:0006520;GO:0008652;GO:0009058;GO:0043436;GO:1901566;GO:0006082;GO:0044249;GO:0046394;GO:0016053;GO:0009081;GO:0006549;GO:0009099;GO:0009097;GO:1901605;GO:1901607;GO:0006573;GO:0005975;GO:0009255;GO:0044262;GO:0016829;GO:0003824;GO:0016836;GO:…	K01687	ENOG4105C01	E	sp|A8FEC5|ILVD_BACP2|Dihydroxy-acid dehydratase OS=Bacillus pumilus (strain SAFR-032) OX=315750 GN=ilvD PE=3 SV=1	dihydroxy-acid dehydratase [Bacillus stratosphericus] KOA78266.1 dihydroxy-acid dehydratase [Bacillus stratosphericus]
gene1108	1.58762	3.17525	0	0	-Inf	1	1	gi|111111112|ref|scaffold2.1|	120198	121337	-	1139	gene1108	GO:0008152;GO:0009405;GO:0051704;GO:0043169;GO:0046914;GO:0043167;GO:0005488;GO:0005506;GO:0046872;GO:0016829;GO:0003824	-	ENOG4106QQ5	C	sp|P54169|YPGR_BACSU|Uncharacterized protein YpgR OS=Bacillus subtilis (strain 168) OX=224308 GN=ypgR PE=4 SV=1	lyase [Bacillus stratosphericus] EMI12006.1 lyase [Bacillus stratosphericus LAMA 585]
gene1109	2.22016	4.44032	0	0	-Inf	1	1	gi|111111112|ref|scaffold2.1|	121368	121991	-	623	gene1109	GO:0008152;GO:0016787;GO:0008081;GO:0043169;GO:0016788;GO:0043167;GO:0042578;GO:0003824;GO:0005488;GO:0046872	K06950	ENOG4105EST	S	sp|P54168|YPGQ_BACSU|Uncharacterized protein YpgQ OS=Bacillus subtilis (strain 168) OX=224308 GN=ypgQ PE=4 SV=1	phosphohydrolase [Bacillus sp. L_1B0_12] KKK10585.1 phosphohydrolase [Bacillus sp. L_1B0_12]
gene111	1.20643	2.41285	0	0	-Inf	1	1	gi|111111111|ref|scaffold1.1|	108230	108658	+	428	gene111	-	-	ENOG41090M4	S	sp|P45711|YNEK_BACSU|Uncharacterized protein YneK OS=Bacillus subtilis (strain 168) OX=224308 GN=yneK PE=4 SV=2	hypothetical protein [Bacillus xiamenensis] EKF35762.1 hypothetical protein BA1_08776 [Bacillus xiamenensis] AOZ90477.1 hypothetical protein BK049_18160 [Bacillus xiamenensis]
gene1110	0.460788	0.921576	0	0	-Inf	1	1	gi|111111112|ref|scaffold2.1|	121994	122476	-	482	gene1110	GO:0044710;GO:0050896;GO:0006950;GO:0008152;GO:0006979;GO:0055114;GO:0016209;GO:0003824;GO:0016684;GO:0004601;GO:0004602;GO:0016491	K00432	ENOG4108V06	O	sp|P52035|BSAA_BACSU|Glutathione peroxidase homolog BsaA OS=Bacillus subtilis (strain 168) OX=224308 GN=bsaA PE=3 SV=1	glutathione peroxidase [Bacillus pumilus]
gene1111	4.12196	8.24391	0	0	-Inf	1	1	gi|111111112|ref|scaffold2.1|	122551	124233	-	1682	gene1111	GO:0006730;GO:0006732;GO:0019752;GO:0051188;GO:0044249;GO:0034641;GO:0006807;GO:0009108;GO:0044281;GO:0044283;GO:1901362;GO:1901566;GO:1901360;GO:1901576;GO:0044710;GO:0071704;GO:0006520;GO:0042398;GO:1901605;GO:1901607;GO:0018130;GO:0044238;GO:0009987;GO:0006725;GO:0009058;GO:0044711;GO:0008152;GO:0043436;GO:1901564;GO:0046483;GO:0008652;GO:0044271;GO:0006575;GO:0006082;GO:0046394;GO:0016053;GO:…	K01938	ENOG4105CKU	F	sp|A8FEC9|FTHS_BACP2|Formate--tetrahydrofolate ligase OS=Bacillus pumilus (strain SAFR-032) OX=315750 GN=fhs PE=3 SV=1	formate--tetrahydrofolate ligase [Bacillus altitudinis] KWZ66852.1 formate--tetrahydrofolate ligase [Bacillus altitudinis]
gene1112	2.90296	5.80593	0	0	-Inf	1	1	gi|111111112|ref|scaffold2.1|	124438	125280	+	842	gene1112	GO:0008152;GO:0019752;GO:0044249;GO:0006807;GO:0009067;GO:0009066;GO:0044283;GO:1901576;GO:0044710;GO:0044711;GO:0006520;GO:0071704;GO:0000096;GO:0044238;GO:0000097;GO:0009987;GO:0009058;GO:0043436;GO:0008652;GO:1901564;GO:1901566;GO:0006082;GO:0044272;GO:0046394;GO:1901605;GO:0006555;GO:0016053;GO:0044237;GO:0006790;GO:1901607;GO:0009086;GO:0044281;GO:0071266;GO:0071265;GO:0009069;GO:0019281;GO:…	K00651	ENOG4105CVG	E	sp|A8FED0|METAA_BACP2|Homoserine O-acetyltransferase OS=Bacillus pumilus (strain SAFR-032) OX=315750 GN=metAA PE=3 SV=1	homoserine O-succinyltransferase [Bacillus pumilus]
gene1113	12.014	24.028	0	0	-Inf	1	1	gi|111111112|ref|scaffold2.1|	125563	126660	+	1097	gene1113	GO:0008152;GO:0044710;GO:0071704;GO:0006629;GO:0009987;GO:0044255;GO:0044238;GO:0044237;GO:0044249;GO:0006643;GO:1901576;GO:0046467;GO:0006664;GO:0009247;GO:0009058;GO:0008610;GO:1901137;GO:1901135;GO:0044723;GO:0005975;GO:0070085;GO:0030258;GO:0030259;GO:0034645;GO:0033692;GO:0000271;GO:0044262;GO:0044260;GO:0043170;GO:0046378;GO:0009246;GO:0034637;GO:0009059;GO:0044264;GO:0005976;GO:0016051;GO:…	K03429	ENOG4108QBV	M	sp|A8FED1|UGTP_BACP2|Processive diacylglycerol beta-glucosyltransferase OS=Bacillus pumilus (strain SAFR-032) OX=315750 GN=ugtP PE=3 SV=1	diglucosyl diacylglycerol synthase [Bacillus sp. M 2-6] EIL84008.1 diacylglycerol glucosyltransferase [Bacillus sp. M 2-6]
gene1114	4.26438	8.52876	0	0	-Inf	1	1	gi|111111112|ref|scaffold2.1|	126696	127397	-	701	gene1114	GO:0006950;GO:0050896	-	ENOG4106ZS8	T	-	AIM24 family protein [Bacillus aerophilus]
gene1116	0.745638	1.49128	0	0	-Inf	1	1	gi|111111112|ref|scaffold2.1|	127917	128099	-	182	gene1116	-	-	-	-	sp|P68731|DEGR_BACSU|Regulatory protein DegR OS=Bacillus subtilis (strain 168) OX=224308 GN=degR PE=1 SV=1	hypothetical protein BACPU_20120 [Bacillus pumilus]
gene1117	1.25669	2.51339	0	0	-Inf	1	1	gi|111111112|ref|scaffold2.1|	128455	129102	-	647	gene1117	GO:0090305;GO:0006139;GO:0044238;GO:0009987;GO:0006725;GO:0044237;GO:0043170;GO:0090304;GO:0071704;GO:0034641;GO:0006807;GO:0008152;GO:1901360;GO:0046483;GO:0016787;GO:0016893;GO:0004518;GO:0004519;GO:0004540;GO:0004521;GO:0004523;GO:0016788;GO:0003824;GO:0016891;GO:0005488;GO:0003676;GO:0097159;GO:1901363;GO:0043169;GO:0043167;GO:0046872;GO:0046914;GO:0008270	K03469	ENOG41081VK	L	sp|P54164|YPEP_BACSU|Uncharacterized protein YpeP OS=Bacillus subtilis (strain 168) OX=224308 GN=ypeP PE=4 SV=2	hypothetical protein [Bacillus pumilus] AKU32698.1 hypothetical protein ID12_15225 [Bacillus pumilus]
gene1118	0.569701	1.1394	0	0	-Inf	1	1	gi|111111112|ref|scaffold2.1|	129302	129910	+	608	gene1118	-	K09125	ENOG4105TVV	S	sp|P54163|QPTR_BACSU|Probable queuosine precursor transporter OS=Bacillus subtilis (strain 168) OX=224308 GN=ypdP PE=3 SV=1	hypothetical protein [Bacillus stratosphericus] KOA77874.1 hypothetical protein ACR53_10850 [Bacillus stratosphericus]
gene1119	0.134047	0.268095	0	0	-Inf	1	1	gi|111111112|ref|scaffold2.1|	130029	130307	+	278	gene1119	GO:0090305;GO:0006139;GO:0044238;GO:0009987;GO:0006725;GO:0044237;GO:0043170;GO:0090304;GO:0071704;GO:0034641;GO:0006807;GO:0008152;GO:1901360;GO:0046483;GO:0005488;GO:0003676;GO:0097159;GO:1901363;GO:0016787;GO:0016893;GO:0004518;GO:0004519;GO:0004540;GO:0004521;GO:0004523;GO:0016788;GO:0003824;GO:0016891	K03469	ENOG4105VND	L	sp|P54162|RNHL_BACSU|14.7 kDa ribonuclease H-like protein OS=Bacillus subtilis (strain 168) OX=224308 GN=rnhA PE=1 SV=1	ribonuclease H [Bacillus stratosphericus] KOA77875.1 ribonuclease H [Bacillus stratosphericus]
gene112	0.959276	1.91855	0	0	-Inf	1	1	gi|111111111|ref|scaffold1.1|	108680	109126	-	446	gene112	-	-	ENOG4108Z93	O	sp|P45710|CCDC_BACSU|Protein CcdC OS=Bacillus subtilis (strain 168) OX=224308 GN=ccdC PE=4 SV=1	hypothetical protein BAME_12320 [Bacillus sp. M 2-6] KIL24929.1 hypothetical protein B4133_1940 [Bacillus pumilus]
gene1120	1.29439	2.58879	0	0	-Inf	1	1	gi|111111112|ref|scaffold2.1|	130514	131401	-	887	gene1120	GO:0008152;GO:0090305;GO:0090304;GO:0034641;GO:0006807;GO:1901360;GO:0006139;GO:0071704;GO:0009987;GO:0006725;GO:0046483;GO:0044238;GO:0044237;GO:0043170;GO:0044260;GO:0006259;GO:0044249;GO:0034645;GO:0006260;GO:1901576;GO:0009058;GO:0009059;GO:0051716;GO:0006281;GO:0044699;GO:0006974;GO:0044763;GO:0050896;GO:0006950;GO:0033554;GO:0003824;GO:0003676;GO:0003677;GO:1901363;GO:0004527;GO:0097159;GO:…	K23786	ENOG4105C2M	L	sp|P54161|EX53_BACSU|5'-3' exonuclease OS=Bacillus subtilis (strain 168) OX=224308 GN=ypcP PE=1 SV=1	5'-3' exonuclease [Bacillus altitudinis] KLV20626.1 5'-3' exonuclease [Bacillus altitudinis]
gene1121	0.00837796	0.0167559	0	0	-Inf	1	1	gi|111111112|ref|scaffold2.1|	131508	131624	-	116	gene1121	-	-	-	-	-	hypothetical protein B4133_2180 [Bacillus pumilus]
gene1122	1.27764	2.55528	0	0	-Inf	1	1	gi|111111112|ref|scaffold2.1|	131676	131939	-	263	gene1122	-	-	ENOG4106ZMS	S	sp|P54160|YPBS_BACSU|Uncharacterized protein YpbS OS=Bacillus subtilis (strain 168) OX=224308 GN=ypbS PE=4 SV=1	hypothetical protein [Bacillus altitudinis] KWZ66840.1 hypothetical protein HQ51_0210220 [Bacillus altitudinis]
gene1123	12.0643	24.1285	0	0	-Inf	1	1	gi|111111112|ref|scaffold2.1|	131981	135574	-	3593	gene1123	GO:0006184;GO:0046434;GO:0009141;GO:0009143;GO:0009144;GO:0009146;GO:0009166;GO:0009164;GO:0006807;GO:0044237;GO:0034655;GO:0046039;GO:0006195;GO:0046130;GO:0009259;GO:1901360;GO:1901361;GO:0046700;GO:0006139;GO:0044710;GO:0072523;GO:1901565;GO:1901068;GO:0042278;GO:1901069;GO:0071704;GO:0009199;GO:0055086;GO:0006152;GO:0046483;GO:0009207;GO:0009205;GO:0009987;GO:0009203;GO:0009154;GO:0006725;GO:…	-	ENOG410890F	S	sp|P54159|YPBR_BACSU|Uncharacterized protein YpbR OS=Bacillus subtilis (strain 168) OX=224308 GN=ypbR PE=4 SV=1	GTP-binding protein [Bacillus altitudinis] KDE30457.1 hypothetical protein BA79_13795 [Bacillus altitudinis 41KF2b]
gene1125	0.0251339	0.0502678	0	0	-Inf	1	1	gi|111111112|ref|scaffold2.1|	135879	136388	-	509	gene1125	GO:0006479;GO:0006481;GO:0018410;GO:0044260;GO:0044238;GO:0019538;GO:0043687;GO:0009987;GO:0006464;GO:0043170;GO:0008213;GO:0071704;GO:0043412;GO:0036211;GO:0043414;GO:0044237;GO:0008152;GO:0044267;GO:0032259;GO:0008757;GO:0016741;GO:0008276;GO:0003824;GO:0016740;GO:0008171;GO:0004671;GO:0051998;GO:0003880;GO:0010340;GO:0008168;GO:0044425;GO:0016021;GO:0016020;GO:0031224	K16168	ENOG4108UUN	S	sp|P54158|YPBQ_BACSU|Uncharacterized protein YpbQ OS=Bacillus subtilis (strain 168) OX=224308 GN=ypbQ PE=4 SV=1	hypothetical protein [Bacillus altitudinis] KLV20629.1 hypothetical protein ABW03_13780 [Bacillus altitudinis]
gene1126	0.213638	0.427276	0	0	-Inf	1	1	gi|111111112|ref|scaffold2.1|	136388	137485	-	1097	gene1126	GO:0009058;GO:0008152;GO:1901576;GO:0044710;GO:0071704;GO:0009987;GO:0044711;GO:0006629;GO:0008610;GO:0044238;GO:0044249;GO:0044281;GO:0044283;GO:0044237;GO:0006633;GO:0006631;GO:0019752;GO:0072330;GO:0032787;GO:0043436;GO:0044255;GO:0006082;GO:0046394;GO:0016053;GO:0016746;GO:0003824;GO:0016740;GO:0016747;GO:0016210;GO:0016020	K16167	ENOG41065KQ	Q	sp|P54157|BCSA_BACSU|Putative chalcone synthase OS=Bacillus subtilis (strain 168) OX=224308 GN=bcsA PE=3 SV=1	type III polyketide synthase [Bacillus stratosphericus] OQP20613.1 type III polyketide synthase [Bacillus stratosphericus]
gene1127	0.142425	0.284851	0	0	-Inf	1	1	gi|111111112|ref|scaffold2.1|	137805	138311	-	506	gene1127	GO:0008152;GO:0016740;GO:0003824	-	ENOG4108MTT	J	sp|Q45133|GRPB_BACPE|Glutamate-rich protein GrpB OS=Bacillus pseudofirmus (strain OF4) OX=398511 GN=grpB PE=3 SV=2	GrpB family protein [Bacillus altitudinis] KDE30460.1 hypothetical protein BA79_13810 [Bacillus altitudinis 41KF2b]
gene1128	2.25367	4.50734	0	0	-Inf	1	1	gi|111111112|ref|scaffold2.1|	138792	139646	+	854	gene1128	GO:0071704;GO:0008152;GO:0044238;GO:0005975;GO:1901575;GO:0009056;GO:0009057;GO:0043170;GO:0000272;GO:0005976;GO:0016052;GO:0044699;GO:0009987;GO:0044763;GO:0044036;GO:0071840;GO:0044260;GO:0071554;GO:0010383;GO:0044237;GO:0045493;GO:0045491;GO:0010410;GO:0016787;GO:0016810;GO:0003824;GO:0016798	K22278	ENOG4107VMI	M	sp|O07596|YHEN_BACSU|Putative polysaccharide deacetylase YheN OS=Bacillus subtilis (strain 168) OX=224308 GN=yheN PE=3 SV=1	polysaccharide deacetylase [Bacillus sp. Leaf49] KQU12241.1 polysaccharide deacetylase [Bacillus sp. Leaf49]
gene1129	0.427276	0.854552	0	0	-Inf	1	1	gi|111111112|ref|scaffold2.1|	139711	141030	-	1319	gene1129	GO:0009987;GO:0051179;GO:0006810;GO:0051234;GO:0044699;GO:0044765;GO:0044763;GO:0055085;GO:0005215;GO:0016020;GO:0016021;GO:0044425;GO:0031224	K16169	ENOG4105C2W	F	sp|P42086|PBUX_BACSU|Xanthine permease OS=Bacillus subtilis (strain 168) OX=224308 GN=pbuX PE=3 SV=1	xanthine permease [Bacillus altitudinis] OJT59233.1 xanthine permease [Bacillus altitudinis]
gene113	0.377008	0.754016	0	0	-Inf	1	1	gi|111111111|ref|scaffold1.1|	109257	109826	-	569	gene113	GO:0055114;GO:0044710;GO:0008152;GO:0022607;GO:0070271;GO:0043933;GO:0017004;GO:0034622;GO:0071822;GO:0016043;GO:0065003;GO:0071840;GO:0006461;GO:0043623;GO:0044085;GO:0044699;GO:0009987;GO:0044763;GO:0042592;GO:0050789;GO:0065007;GO:0065008;GO:0019725;GO:0050794;GO:0045454;GO:0003824;GO:0016491;GO:0016209;GO:0016020;GO:0016021;GO:0044425;GO:0031224	K06196	ENOG4107QIV	O	sp|P45706|CCDA_BACSU|Cytochrome c-type biogenesis protein CcdA OS=Bacillus subtilis (strain 168) OX=224308 GN=ccdA PE=3 SV=1	cytochrome C biogenesis protein CcdA [Bacillus stratosphericus] KOA81799.1 cytochrome C biogenesis protein CcdA [Bacillus stratosphericus]
gene1130	0.0670237	0.134047	0	0	-Inf	1	1	gi|111111112|ref|scaffold2.1|	141027	141644	-	617	gene1130	GO:0008152;GO:0044237;GO:0034641;GO:0006807;GO:0006139;GO:0044710;GO:1901360;GO:0071704;GO:0009987;GO:1901135;GO:0006725;GO:0055086;GO:0009116;GO:1901564;GO:0046483;GO:0044238;GO:1901657;GO:0044281;GO:0072522;GO:0046110;GO:0072521;GO:1901362;GO:0043101;GO:0018130;GO:1901576;GO:0009112;GO:0009058;GO:0034654;GO:0043094;GO:0044271;GO:1901566;GO:0019438;GO:0044249;GO:0006144;GO:1901293;GO:0046129;GO:…	K03816	ENOG4108UPS	F	sp|A8FEE7|XPT_BACP2|Xanthine phosphoribosyltransferase OS=Bacillus pumilus (strain SAFR-032) OX=315750 GN=xpt PE=3 SV=1	xanthine phosphoribosyltransferase [Bacillus stratosphericus LAMA 585]
gene1132	8.65443	17.3089	0	0	-Inf	1	1	gi|111111112|ref|scaffold2.1|	143601	145403	-	1802	gene1132	GO:0008152;GO:1901360;GO:0046483;GO:0034641;GO:0006807;GO:0006139;GO:0009987;GO:0006725;GO:0071704;GO:0044238;GO:0044237;GO:0046434;GO:0009166;GO:0009167;GO:0009164;GO:0044281;GO:0009161;GO:0046130;GO:0009169;GO:0044710;GO:0009199;GO:0042454;GO:0009207;GO:0009205;GO:0009203;GO:0046034;GO:0046128;GO:1901564;GO:1901565;GO:0006163;GO:0019637;GO:0009141;GO:0009143;GO:0009144;GO:0009146;GO:0006195;GO:…	K03722	ENOG4105DVT	L	sp|P50831|YPVA_BACSU|Probable ATP-dependent helicase YpvA OS=Bacillus subtilis (strain 168) OX=224308 GN=ypvA PE=3 SV=1	ATP-dependent helicase [Bacillus stratosphericus] KOA77887.1 ATP-dependent helicase [Bacillus stratosphericus]
gene1134	2.23692	4.47383	0	0	-Inf	1	1	gi|111111112|ref|scaffold2.1|	145917	147071	-	1154	gene1134	GO:0008152;GO:0032259;GO:0070476;GO:0090304;GO:0034641;GO:0006807;GO:0006139;GO:0044260;GO:1901360;GO:0071704;GO:0009987;GO:0006725;GO:0043412;GO:0043414;GO:0046483;GO:0044238;GO:0044237;GO:0043170;GO:0009451;GO:0034660;GO:0071840;GO:0042254;GO:0010467;GO:0006364;GO:0022613;GO:0034470;GO:0031167;GO:0001510;GO:0016070;GO:0016072;GO:0000154;GO:0044085;GO:0006396;GO:0036265;GO:0036260;GO:0009452;GO:…	K07444	ENOG4105C4H	L	sp|P50840|YPSC_BACSU|Putative RNA methyltransferase YpsC OS=Bacillus subtilis (strain 168) OX=224308 GN=ypsC PE=3 SV=1	RNA methyltransferase [Bacillus pumilus] AMB90124.1 RNA methyltransferase [Bacillus pumilus]
gene1136	0.536189	1.07238	0	0	-Inf	1	1	gi|111111112|ref|scaffold2.1|	147622	147954	-	332	gene1136	GO:0007049;GO:0051301;GO:0009987;GO:0044763;GO:0044699;GO:0022604;GO:0022603;GO:0051128;GO:0050789;GO:0065007;GO:0065008;GO:0050793;GO:0050794;GO:0008360;GO:0005737;GO:0044424;GO:0044464;GO:0005623;GO:0005622	-	ENOG4105XWG	D	sp|A8FEF4|GPSB_BACP2|Cell cycle protein GpsB OS=Bacillus pumilus (strain SAFR-032) OX=315750 GN=gpsB PE=3 SV=1	cell cycle protein gpsb [Bacillus stratosphericus LAMA 585]
gene1137	0.150803	0.301607	0	0	-Inf	1	1	gi|111111112|ref|scaffold2.1|	148003	148545	-	542	gene1137	-	-	ENOG4108UKS	S	sp|A8FEF5|Y1952_BACP2|UPF0398 protein BPUM_1952 OS=Bacillus pumilus (strain SAFR-032) OX=315750 GN=BPUM_1952 PE=3 SV=2	YpsA protein [Bacillus pumilus] SFY06745.1 Uncharacterized SPBc2 prophage-derived protein YoqJ [Bacillus sp. ru9509.4]
gene1138	3.06214	6.12429	0	0	-Inf	1	1	gi|111111112|ref|scaffold2.1|	149146	150393	-	1247	gene1138	GO:0090305;GO:0006139;GO:0044238;GO:0009987;GO:0006725;GO:0044237;GO:0043170;GO:0090304;GO:0071704;GO:0034641;GO:0006807;GO:0008152;GO:1901360;GO:0046483;GO:0097159;GO:0005488;GO:0003676;GO:1901363;GO:0016787;GO:0004518;GO:0004527;GO:0016788;GO:0003824	K07502	ENOG4108BMS	L	sp|P50837|YPRB_BACSU|Uncharacterized protein YprB OS=Bacillus subtilis (strain 168) OX=224308 GN=yprB PE=4 SV=1	hypothetical protein [Bacillus stratosphericus] KMK99939.1 hypothetical protein VL05_14970 [Bacillus stratosphericus] KML51978.1 hypothetical protein VL17_13485 [Bacillus stratosphericus]
gene1139	2.71027	5.42054	0	0	-Inf	1	1	gi|111111112|ref|scaffold2.1|	150417	152681	-	2264	gene1139	GO:0046434;GO:0009141;GO:0009143;GO:0009144;GO:0009146;GO:0009166;GO:0009167;GO:0009128;GO:0006807;GO:0044237;GO:0009161;GO:0009123;GO:0006195;GO:0009126;GO:0009259;GO:1901360;GO:0009125;GO:0046700;GO:0006139;GO:0044710;GO:0072523;GO:1901565;GO:0046130;GO:0046483;GO:0042278;GO:0006200;GO:0071704;GO:0009199;GO:0055086;GO:0006152;GO:0009169;GO:0009207;GO:0009205;GO:0009987;GO:0009203;GO:0009158;GO:…	K06877	ENOG4108I5C	L	sp|P50830|YPRA_BACSU|Uncharacterized ATP-dependent helicase YprA OS=Bacillus subtilis (strain 168) OX=224308 GN=yprA PE=3 SV=1	atp-dependent helicase [Bacillus stratosphericus LAMA 585]
gene114	0.175937	0.351874	0	0	-Inf	1	1	gi|111111111|ref|scaffold1.1|	110173	110346	+	173	gene114	-	-	-	-	sp|O31819|YNZD_BACSU|Aspartyl-phosphate phosphatase YnzD OS=Bacillus subtilis (strain 168) OX=224308 GN=ynzD PE=2 SV=1	Spo0E like sporulation regulatory protein [Bacillus sp. RRD69]
gene1140	1.5206	3.0412	0	0	-Inf	1	1	gi|111111112|ref|scaffold2.1|	152815	153942	+	1127	gene1140	GO:0008152;GO:0044710;GO:0055114;GO:0016491;GO:0003824;GO:0005488;GO:0050662;GO:0048037;GO:0043167;GO:1901363;GO:1901265;GO:0043168;GO:0000166;GO:0010181;GO:0036094;GO:0097159;GO:0032553;GO:0050660;GO:0016627;GO:0016628;GO:0008670	-	ENOG4105CCY	C	sp|P54524|YQIG_BACSU|Probable NADH-dependent flavin oxidoreductase YqiG OS=Bacillus subtilis (strain 168) OX=224308 GN=yqiG PE=3 SV=1	NADH-dependent flavin oxidoreductase [Bacillus stratosphericus] KML51980.1 NADH-dependent flavin oxidoreductase [Bacillus stratosphericus] KOA77894.1 NADH-dependent flavin oxidoreductase [Bacillus stratosphericus] KQU12252.1 NADH-dependent flavin oxidoreductase [Bacillus sp. Leaf49] KSU71223.1 NADH-dependent flavin oxidoreductase [Bacillus cellulasensis] AMB90129.1 NADH-dependent flavin oxidoredu…
gene1141	0.347685	0.695371	0	0	-Inf	1	1	gi|111111112|ref|scaffold2.1|	153994	154416	-	422	gene1141	GO:0051179;GO:0044699;GO:0008643;GO:0071702;GO:0006810;GO:0044765;GO:0051234;GO:0034219;GO:0015992;GO:0015672;GO:0006818;GO:0006812;GO:0006811;GO:0009401;GO:0034220;GO:0044763;GO:0055085;GO:0009987;GO:0008152;GO:0016310;GO:0044237;GO:0006796;GO:0006793;GO:0015766;GO:0015772;GO:0015771;GO:0042946;GO:0000017;GO:1901656;GO:0015291;GO:1901476;GO:0016740;GO:0005402;GO:0015144;GO:0022804;GO:0015295;GO:…	K02777	ENOG4105C5Y	G	sp|P50829|YPQE_BACSU|Putative phosphotransferase enzyme IIA component YpqE OS=Bacillus subtilis (strain 168) OX=224308 GN=ypqE PE=3 SV=1	PTS glucose transporter subunit IIA [Bacillus aerophilus]
gene1142	0.00837796	0.0167559	0	0	-Inf	1	1	gi|111111112|ref|scaffold2.1|	154669	155088	+	419	gene1142	-	-	-	-	sp|P50836|YPQA_BACSU|Uncharacterized protein YpqA OS=Bacillus subtilis (strain 168) OX=224308 GN=ypqA PE=3 SV=1	Uncharacterised protein [Streptococcus pneumoniae]
gene1143	0.0167559	0.0335118	0	0	-Inf	1	1	gi|111111112|ref|scaffold2.1|	155110	155562	-	452	gene1143	GO:0019012;GO:0019028;GO:0044423	-	ENOG41079SR	S	sp|P50835|YPPG_BACSU|Uncharacterized protein YppG OS=Bacillus subtilis (strain 168) OX=224308 GN=yppG PE=4 SV=1	spore coat protein [Bacillus stratosphericus] OQP20595.1 spore coat protein [Bacillus stratosphericus]
gene1144	0.20526	0.41052	0	0	-Inf	1	1	gi|111111112|ref|scaffold2.1|	155671	155886	-	215	gene1144	-	-	-	-	sp|P50833|YPPE_BACSU|Uncharacterized protein YppE OS=Bacillus subtilis (strain 168) OX=224308 GN=yppE PE=1 SV=1	hypothetical protein [Bacillus pumilus] AMM89346.1 hypothetical protein UP15_10300 [Bacillus pumilus]
gene1145	0.00837796	0.0167559	0	0	-Inf	1	1	gi|111111112|ref|scaffold2.1|	156101	156337	-	236	gene1145	-	-	-	-	-	hypothetical protein BA79_12208 [Bacillus altitudinis 41KF2b]
gene1147	0.557134	1.11427	0	0	-Inf	1	1	gi|111111112|ref|scaffold2.1|	156659	157594	-	935	gene1147	-	-	ENOG4108SMX	S	sp|P39791|YPPC_BACSU|Uncharacterized protein YppC OS=Bacillus subtilis (strain 168) OX=224308 GN=yppC PE=4 SV=2	hypothetical protein [Bacillus altitudinis] OPW94564.1 hypothetical protein BG911_01360 [Bacillus altitudinis]
gene1148	0.837796	1.67559	0	0	-Inf	1	1	gi|111111112|ref|scaffold2.1|	157662	158297	+	635	gene1148	GO:0090305;GO:0090304;GO:0034641;GO:0006807;GO:0044699;GO:0006139;GO:0051716;GO:0044260;GO:0071704;GO:1901360;GO:0006281;GO:0009987;GO:0006725;GO:0006974;GO:0006950;GO:0044763;GO:0008152;GO:0046483;GO:0006310;GO:0044238;GO:0050896;GO:0044237;GO:0043170;GO:0033554;GO:0006259;GO:0007059;GO:0046872;GO:0016787;GO:0043169;GO:0004518;GO:0004519;GO:0016788;GO:0043167;GO:0003824;GO:0005488;GO:0003676;GO:…	K03700	ENOG4108UI2	S	sp|A8FEG6|RECU_BACP2|Holliday junction resolvase RecU OS=Bacillus pumilus (strain SAFR-032) OX=315750 GN=recU PE=3 SV=1	holliday junction-specific endonuclease [Bacillus stratosphericus LAMA 585] BAT49109.1 Holliday junction-specific endonuclease [Bacillus pumilus]
gene1149	37.7846	75.5692	0	0	-Inf	1	1	gi|111111112|ref|scaffold2.1|	158317	161007	+	2690	gene1149	GO:0008152;GO:0044699;GO:0009987;GO:0044763;GO:0071704;GO:0006807;GO:0044260;GO:0043170;GO:0044237;GO:0071840;GO:1901564;GO:1901566;GO:0070589;GO:0030203;GO:0009252;GO:0044036;GO:0044038;GO:1901576;GO:0044710;GO:0042546;GO:0006022;GO:0006023;GO:0006024;GO:0044249;GO:0034645;GO:0009273;GO:1901137;GO:1901135;GO:0071554;GO:0000270;GO:0009058;GO:0009059;GO:0044085;GO:0050896;GO:0042221;GO:0046677;GO:…	K05366	ENOG4105BZ4	M	sp|P39793|PBPA_BACSU|Penicillin-binding protein 1A/1B OS=Bacillus subtilis (strain 168) OX=224308 GN=ponA PE=1 SV=1	peptidase [Bacillus stratosphericus] KOA77903.1 peptidase [Bacillus stratosphericus]
gene115	0.603213	1.20643	0	0	-Inf	1	1	gi|111111111|ref|scaffold1.1|	110615	110833	-	218	gene115	GO:0043169;GO:0043167;GO:0005488;GO:0046872;GO:0005509;GO:0016020;GO:0016021;GO:0044464;GO:0005623;GO:0071944;GO:0005886;GO:0044425;GO:0031224	K09976	ENOG4105VXM	S	sp|A8FDQ3|Y1692_BACP2|UPF0154 protein BPUM_1692 OS=Bacillus pumilus (strain SAFR-032) OX=315750 GN=BPUM_1692 PE=3 SV=1	hypothetical protein [Bacillus gobiensis] ALC81158.1 hypothetical protein AM592_05765 [Bacillus gobiensis]
gene1150	0.565512	1.13102	0	0	-Inf	1	1	gi|111111112|ref|scaffold2.1|	161043	161552	-	509	gene1150	-	-	-	-	sp|P39789|YPOC_BACSU|Uncharacterized protein YpoC OS=Bacillus subtilis (strain 168) OX=224308 GN=ypoC PE=1 SV=1	hypothetical protein [Bacillus altitudinis] KWZ66815.1 hypothetical protein HQ51_0210090 [Bacillus altitudinis]
gene1151	1.22318	2.44636	0	0	-Inf	1	1	gi|111111112|ref|scaffold2.1|	161549	162211	-	662	gene1151	GO:0090304;GO:0034641;GO:0006807;GO:0006139;GO:0044260;GO:0071704;GO:1901360;GO:0009987;GO:0006725;GO:0008152;GO:0046483;GO:0044238;GO:0044237;GO:0043170;GO:0006259;GO:0044699;GO:0051716;GO:0006281;GO:0006974;GO:0006950;GO:0044763;GO:0050896;GO:0033554;GO:0006284;GO:0090305;GO:0003824;GO:0016829;GO:0003906;GO:0016835;GO:0016787;GO:0016788;GO:0004518;GO:0004519;GO:0005488;GO:0003676;GO:0003677;GO:…	K10773	ENOG4105CSM	L	sp|P39788|END3_BACSU|Endonuclease III OS=Bacillus subtilis (strain 168) OX=224308 GN=nth PE=3 SV=1	endonuclease iii [Bacillus stratosphericus LAMA 585]
gene1152	1.77613	3.55226	0	0	-Inf	1	1	gi|111111112|ref|scaffold2.1|	162229	162933	-	704	gene1152	-	K02086	ENOG4108XZ0	L	sp|P39787|DNAD_BACSU|DNA replication protein DnaD OS=Bacillus subtilis (strain 168) OX=224308 GN=dnaD PE=1 SV=1	DNA replication protein DnaD [Bacillus pumilus] AKC66401.1 DNA replication protein DnaD [Bacillus pumilus] ALM28898.1 DNA replication protein DnaD [Bacillus pumilus] ALM45437.1 DNA replication protein DnaD [Bacillus pumilus] ANY96916.1 DNA replication protein DnaD [Bacillus pumilus]
gene1153	15.2772	30.5544	0	0	-Inf	1	1	gi|111111112|ref|scaffold2.1|	163031	164386	-	1355	gene1153	GO:0019752;GO:0090304;GO:0044249;GO:0034641;GO:0006807;GO:0044281;GO:0034645;GO:0034660;GO:1901360;GO:0006139;GO:0044710;GO:0044260;GO:0006520;GO:0071704;GO:0010467;GO:0044267;GO:0009987;GO:0006725;GO:0009058;GO:0009059;GO:0008152;GO:0043436;GO:0046483;GO:0016070;GO:0044238;GO:1901564;GO:0006082;GO:0019538;GO:0044237;GO:0043170;GO:0006399;GO:0043038;GO:0043039;GO:0006418;GO:1901576;GO:0006412;GO:…	K01893	ENOG4105C5S	J	sp|Q65I63|SYN_BACLD|Asparagine--tRNA ligase OS=Bacillus licheniformis (strain ATCC 14580 / DSM 13 / JCM 2505 / NBRC 12200 / NCIMB 9375 / NRRL NRS-1264 / Gibson 46) OX=279010 GN=asnS PE=3 SV=1	asparaginyl-trna synthetase [Bacillus stratosphericus LAMA 585]
gene1154	0.0963465	0.192693	0	0	-Inf	1	1	gi|111111112|ref|scaffold2.1|	164440	164925	-	485	gene1154	GO:0071704;GO:0006807;GO:1901564;GO:0009308;GO:0008152;GO:0043169;GO:0005507;GO:0046914;GO:0043167;GO:0048037;GO:0005488;GO:0048038;GO:0046872	-	ENOG4105VPR	S	sp|P54396|YPMB_BACSU|Uncharacterized protein YpmB OS=Bacillus subtilis (strain 168) OX=224308 GN=ypmB PE=1 SV=1	hypothetical protein [Bacillus altitudinis] KDE31031.1 hypothetical protein BA79_12163 [Bacillus altitudinis 41KF2b]
gene1155	5.87295	11.7459	0	0	-Inf	1	1	gi|111111112|ref|scaffold2.1|	165241	168033	-	2792	gene1155	GO:0008152;GO:1901360;GO:0046483;GO:0034641;GO:0006807;GO:0006139;GO:0009987;GO:0006725;GO:0071704;GO:0044238;GO:0044237;GO:0046434;GO:0009166;GO:0009167;GO:0009164;GO:0044281;GO:0009161;GO:0046130;GO:0009169;GO:0044710;GO:0009199;GO:0042454;GO:0009207;GO:0009205;GO:0009203;GO:0046034;GO:0046128;GO:1901564;GO:1901565;GO:0006163;GO:0019637;GO:0009141;GO:0009143;GO:0009144;GO:0009146;GO:0006195;GO:…	K03722	ENOG4105DVT	L	sp|P54394|DING_BACSU|3'-5' exonuclease DinG OS=Bacillus subtilis (strain 168) OX=224308 GN=dinG PE=3 SV=1	ATP-dependent helicase DinG [Bacillus stratosphericus] EMI12043.1 bifunctional atp-dependent dna helicase dna polymerase iii subunit epsilon [Bacillus stratosphericus LAMA 585]
gene1156	0.397953	0.795906	0	0	-Inf	1	1	gi|111111112|ref|scaffold2.1|	168149	168517	-	368	gene1156	GO:0044238;GO:0071704;GO:0008152;GO:0019752;GO:0044249;GO:0006807;GO:0044281;GO:0044283;GO:1901566;GO:1901576;GO:0044710;GO:0044711;GO:0006523;GO:0006522;GO:0006520;GO:1901605;GO:1901607;GO:0009987;GO:0009058;GO:0009078;GO:0009079;GO:0043436;GO:1901564;GO:0008652;GO:0006082;GO:0046394;GO:0016053;GO:0044237;GO:0006732;GO:0015939;GO:0051186;GO:0042364;GO:0034641;GO:0009108;GO:0051188;GO:0042398;GO:…	K01579	ENOG4108Z2X	H	sp|A8FEH5|PAND_BACP2|Aspartate 1-decarboxylase OS=Bacillus pumilus (strain SAFR-032) OX=315750 GN=panD PE=3 SV=1	aspartate alpha-decarboxylase [Bacillus sp. M 2-6] CVM12418.1 aspartate 1-decarboxylase [Streptococcus pneumoniae] SCC23189.1 L-aspartate 1-decarboxylase [Bacillus sp. nio-1130] SIT89769.1 L-aspartate 1-decarboxylase [Bacillus sp. RRD69]
gene1157	4.90948	9.81897	0	0	-Inf	1	1	gi|111111112|ref|scaffold2.1|	168525	169391	-	866	gene1157	GO:0008152;GO:0044238;GO:0042398;GO:0015939;GO:0051186;GO:0019752;GO:0042364;GO:0044249;GO:0034641;GO:0006807;GO:0009108;GO:0044281;GO:0044283;GO:1901566;GO:1901576;GO:0044710;GO:0044711;GO:0071704;GO:0006520;GO:0051188;GO:0006732;GO:0006767;GO:0006766;GO:0043604;GO:0009987;GO:0015940;GO:0009058;GO:0009110;GO:0043436;GO:1901564;GO:0008652;GO:0044271;GO:0006575;GO:0006082;GO:0046394;GO:0016053;GO:…	K01918	ENOG4108IAA	H	sp|A8FEH6|PANC_BACP2|Pantothenate synthetase OS=Bacillus pumilus (strain SAFR-032) OX=315750 GN=panC PE=3 SV=1	pantoate--beta-alanine ligase [Bacillus pumilus] AMB90146.1 pantoate--beta-alanine ligase [Bacillus pumilus]
gene1158	3.80359	7.60719	0	0	-Inf	1	1	gi|111111112|ref|scaffold2.1|	169388	170227	-	839	gene1158	GO:0008152;GO:0044238;GO:0042398;GO:0015939;GO:0051186;GO:0019752;GO:0042364;GO:0044249;GO:0034641;GO:0006807;GO:0009108;GO:0044281;GO:0044283;GO:1901566;GO:1901576;GO:0044710;GO:0044711;GO:0071704;GO:0006520;GO:0051188;GO:0006732;GO:0006767;GO:0006766;GO:0043604;GO:0009987;GO:0015940;GO:0009058;GO:0009110;GO:0043436;GO:1901564;GO:0008652;GO:0044271;GO:0006575;GO:0006082;GO:0046394;GO:0016053;GO:…	K00606	ENOG4105CCG	H	sp|A8FEH7|PANB_BACP2|3-methyl-2-oxobutanoate hydroxymethyltransferase OS=Bacillus pumilus (strain SAFR-032) OX=315750 GN=panB PE=3 SV=1	3-methyl-2-oxobutanoate hydroxymethyltransferase [Bacillus stratosphericus LAMA 585]
gene1159	1.25251	2.50501	0	0	-Inf	1	1	gi|111111112|ref|scaffold2.1|	170427	170996	-	569	gene1159	GO:0008152;GO:0071704;GO:0009987;GO:0044237;GO:0044238;GO:0019538;GO:0043170;GO:0044267;GO:0044260;GO:0006464;GO:0043412;GO:0036211;GO:0080090;GO:0019222;GO:0031326;GO:0031323;GO:0050789;GO:2000112;GO:0065007;GO:0060255;GO:0010468;GO:0019219;GO:0009889;GO:0050794;GO:0051171;GO:2001141;GO:0051252;GO:0006355;GO:0010556;GO:0016874;GO:0003824;GO:0018271;GO:0004077;GO:0016879	K03524	ENOG4105HJX	H	sp|P0CI75|BIRA_BACSU|Bifunctional ligase/repressor BirA OS=Bacillus subtilis (strain 168) OX=224308 GN=birA PE=1 SV=1	biotin--[acetyl-CoA-carboxylase] ligase [Bacillus pumilus] AKU32738.1 biotin--acetyl-CoA-carboxylase ligase [Bacillus pumilus] AMB90148.1 biotin--acetyl-CoA-carboxylase ligase [Bacillus pumilus]
gene116	0.837796	1.67559	0	0	-Inf	1	1	gi|111111111|ref|scaffold1.1|	110918	111364	-	446	gene116	-	-	-	-	sp|P45707|SIRA_BACSU|Sporulation inhibitor of replication protein SirA OS=Bacillus subtilis (strain 168) OX=224308 GN=sirA PE=1 SV=1	sporulation inhibitor of replication protein SirA [Bacillus xiamenensis] AOZ90482.1 sporulation inhibitor of replication protein SirA [Bacillus xiamenensis]
gene1160	0.561323	1.12265	0	0	-Inf	1	1	gi|111111112|ref|scaffold2.1|	170993	171265	-	272	gene1160	-	-	-	-	-	-
gene1161	1.39912	2.79824	0	0	-Inf	1	1	gi|111111112|ref|scaffold2.1|	171383	172228	-	845	gene1161	GO:0008152;GO:0090304;GO:0034641;GO:0006807;GO:1901360;GO:0006139;GO:0044260;GO:0071704;GO:0009987;GO:0006725;GO:0046483;GO:0016070;GO:0044238;GO:0044237;GO:0043170;GO:0010467;GO:0006396;GO:0034660;GO:0034470;GO:0008033;GO:0006399;GO:0031123;GO:0042780;GO:0001680;GO:0043628;GO:0042245;GO:0016311;GO:0006796;GO:0006793;GO:0003723;GO:0016779;GO:0003824;GO:0016740;GO:0016772;GO:0005488;GO:0003676;GO:…	K00974	ENOG4105D4J	J	sp|A8FEH9|CCA_BACP2|CCA-adding enzyme OS=Bacillus pumilus (strain SAFR-032) OX=315750 GN=cca PE=3 SV=1	tRNA CCA-pyrophosphorylase [Streptococcus pneumoniae]
gene1162	0.330929	0.661859	0	0	-Inf	1	1	gi|111111112|ref|scaffold2.1|	172578	173723	-	1145	gene1162	GO:0009058;GO:0008152;GO:0003824;GO:0016740;GO:0016757	K00754	ENOG4105CPK	M	sp|P42982|BSHA_BACSU|N-acetyl-alpha-D-glucosaminyl L-malate synthase OS=Bacillus subtilis (strain 168) OX=224308 GN=bshA PE=1 SV=2	glycosyl transferase%2C group 1 family protein [Streptococcus pneumoniae]
gene1163	0.180126	0.360252	0	0	-Inf	1	1	gi|111111112|ref|scaffold2.1|	173726	174373	-	647	gene1163	-	K01463	ENOG4107T80	S	sp|P42981|BSHB1_BACSU|N-acetyl-alpha-D-glucosaminyl L-malate deacetylase 1 OS=Bacillus subtilis (strain 168) OX=224308 GN=bshB1 PE=3 SV=2	bacillithiol biosynthesis deacetylase BshB1 [Bacillus pumilus] ALM28888.1 deacetylase [Bacillus pumilus] ALM45427.1 deacetylase [Bacillus pumilus] CVM12547.1 Uncharacterized proteins%2C LmbE homologs [Streptococcus pneumoniae] ANY96906.1 deacetylase [Bacillus pumilus]
gene1164	0.599024	1.19805	0	0	-Inf	1	1	gi|111111112|ref|scaffold2.1|	174417	174836	-	419	gene1164	GO:0008152;GO:1901576;GO:0044710;GO:0006081;GO:0071704;GO:0009438;GO:0009987;GO:0044237;GO:0044249;GO:0009058;GO:0019242;GO:0046184;GO:0003824;GO:0016838;GO:0016835;GO:0016829;GO:0008929	K01734	ENOG4108Z5K	G	sp|A8FEI2|MGSA_BACP2|Methylglyoxal synthase OS=Bacillus pumilus (strain SAFR-032) OX=315750 GN=mgsA PE=3 SV=1	methylglyoxal synthase [Bacillus stratosphericus LAMA 585]
gene1165	0.222016	0.444032	0	0	-Inf	1	1	gi|111111112|ref|scaffold2.1|	174854	175657	-	803	gene1165	GO:0044238;GO:0019752;GO:0016053;GO:0044249;GO:0006807;GO:0044283;GO:1901576;GO:0044710;GO:0044711;GO:0006520;GO:0071704;GO:0043648;GO:0009987;GO:0009058;GO:0008152;GO:0043436;GO:0008652;GO:1901564;GO:1901566;GO:0006082;GO:0046394;GO:0044237;GO:0046451;GO:0044281;GO:0043650;GO:0019877;GO:0055114;GO:0009067;GO:0009066;GO:1901605;GO:1901607;GO:0006553;GO:0009089;GO:0009085;GO:0016491;GO:0003824;GO:…	K00215	ENOG4105DUK	E	sp|A8FEI3|DAPB_BACP2|4-hydroxy-tetrahydrodipicolinate reductase OS=Bacillus pumilus (strain SAFR-032) OX=315750 GN=dapB PE=3 SV=1	4-hydroxy-tetrahydrodipicolinate reductase [Bacillus pumilus] AKU32743.1 dihydrodipicolinate reductase [Bacillus pumilus]
gene1167	0.942521	1.88504	0	0	-Inf	1	1	gi|111111112|ref|scaffold2.1|	176220	177008	+	788	gene1167	-	-	ENOG4108JYZ	S	sp|P42978|YPJC_BACSU|UPF0750 membrane protein YpjC OS=Bacillus subtilis (strain 168) OX=224308 GN=ypjC PE=3 SV=2	YitT family protein [Bacillus pumilus] ABV62652.1 hypothetical protein BPUM_1982 [Bacillus pumilus SAFR-032] OUZ11857.1 hypothetical protein BHE94_03830 [Bacillus pumilus]
gene1168	0.511056	1.02211	0	0	-Inf	1	1	gi|111111112|ref|scaffold2.1|	177039	177845	-	806	gene1168	-	-	ENOG4106FWI	S	sp|P54393|YPJB_BACSU|Uncharacterized protein YpjB OS=Bacillus subtilis (strain 168) OX=224308 GN=ypjB PE=3 SV=1	sporulation protein [Bacillus stratosphericus LAMA 585]
gene1169	0.506867	1.01373	0	0	-Inf	1	1	gi|111111112|ref|scaffold2.1|	177911	178504	-	593	gene1169	-	-	ENOG4108YNZ	S	sp|P54392|YPJA_BACSU|Uncharacterized protein YpjA OS=Bacillus subtilis (strain 168) OX=224308 GN=ypjA PE=4 SV=1	hypothetical protein [Bacillus pumilus] ALM28882.1 hypothetical protein AKO65_12965 [Bacillus pumilus] ALM45421.1 hypothetical protein AMR71_09275 [Bacillus pumilus] ANY96900.1 hypothetical protein AKO66_09280 [Bacillus pumilus]
gene117	81.1405	162.281	0	0	-Inf	1	1	gi|111111111|ref|scaffold1.1|	111563	113566	-	2003	gene117	GO:0008152;GO:0003824;GO:0016740;GO:0005488;GO:0043169;GO:0043167;GO:0046872;GO:0016744;GO:0004802	K00615	ENOG4105CV1	G	sp|P45694|TKT_BACSU|Transketolase OS=Bacillus subtilis (strain 168) OX=224308 GN=tkt PE=3 SV=2	transketolase [Bacillus stratosphericus] EMI13258.1 transketolase [Bacillus stratosphericus LAMA 585]
gene1170	33.8637	67.7274	0	0	-Inf	1	1	gi|111111112|ref|scaffold2.1|	178607	179356	-	749	gene1170	GO:0055114;GO:0044710;GO:0008152;GO:0009987;GO:0044237;GO:0022900;GO:0006091;GO:0015980;GO:0045333;GO:0022904;GO:0003824;GO:0009055;GO:0016491;GO:0020037;GO:0046906;GO:0097159;GO:0005488;GO:1901363;GO:0043169;GO:0046872;GO:0046914;GO:0043167;GO:0005506;GO:0016020;GO:0016021;GO:0044425;GO:0031224	K03888	ENOG4105PE6	C	sp|P46913|QCRC_BACSU|Menaquinol-cytochrome c reductase cytochrome b/c subunit OS=Bacillus subtilis (strain 168) OX=224308 GN=qcrC PE=3 SV=1	Cytochrome c551 [Streptococcus pneumoniae]
gene1171	5.47919	10.9584	0	0	-Inf	1	1	gi|111111112|ref|scaffold2.1|	179416	180090	-	674	gene1171	GO:0044710;GO:0008152;GO:0055114;GO:0009987;GO:0006091;GO:0022900;GO:0044237;GO:0022904;GO:0045333;GO:0015980;GO:0015979;GO:0009055;GO:0016491;GO:0003824;GO:0005488;GO:0046872;GO:0043169;GO:0043167;GO:1901363;GO:0020037;GO:0046906;GO:0097159;GO:0046914;GO:0005506;GO:0045158;GO:0016020;GO:0044425;GO:0031224;GO:0016021;GO:0070469;GO:0044464;GO:0005623;GO:0005622;GO:0044424;GO:0009579;GO:0044436;GO:…	K03887	ENOG4105DJ5	C	sp|P46912|QCRB_BACSU|Menaquinol-cytochrome c reductase cytochrome b subunit OS=Bacillus subtilis (strain 168) OX=224308 GN=qcrB PE=1 SV=1	cytochrome B6 [Bacillus licheniformis CG-B52]
gene1172	4.27695	8.5539	0	0	-Inf	1	1	gi|111111112|ref|scaffold2.1|	180093	180599	-	506	gene1172	GO:0044710;GO:0055114;GO:0008152;GO:0009987;GO:0006818;GO:0015992;GO:0055085;GO:0006812;GO:0006811;GO:0006810;GO:0034220;GO:0044765;GO:0044763;GO:0051179;GO:0051234;GO:0015672;GO:0044699;GO:0044237;GO:0022900;GO:0006091;GO:0015979;GO:0005488;GO:0016491;GO:0043169;GO:0051540;GO:0043167;GO:0046872;GO:0003824;GO:0051536;GO:0051537;GO:0016679;GO:0008121;GO:0015077;GO:0016681;GO:0005215;GO:0008324;GO:…	K03886	ENOG4105DQV	C	sp|P46911|QCRA_BACSU|Menaquinol-cytochrome c reductase iron-sulfur subunit OS=Bacillus subtilis (strain 168) OX=224308 GN=qcrA PE=3 SV=1	menaquinol-cytochrome c reductase [Bacillus zhangzhouensis] KEP27337.1 menaquinol-cytochrome C reductase [Bacillus zhangzhouensis]
gene1173	0.0837796	0.167559	0	0	-Inf	1	1	gi|111111112|ref|scaffold2.1|	180744	181190	-	446	gene1173	-	-	ENOG4105U33	S	sp|P54391|YPIF_BACSU|Uncharacterized protein YpiF OS=Bacillus subtilis (strain 168) OX=224308 GN=ypiF PE=4 SV=1	hypothetical protein [Bacillus sp. RRD69] SIT89848.1 Protein of unknown function [Bacillus sp. RRD69]
gene1175	4.69166	9.38332	0	0	-Inf	1	1	gi|111111112|ref|scaffold2.1|	181867	182820	-	953	gene1175	GO:0008152;GO:0003824;GO:0016740	-	ENOG41068YB	S	sp|P54389|YPIA_BACSU|TPR repeat-containing protein YpiA OS=Bacillus subtilis (strain 168) OX=224308 GN=ypiA PE=4 SV=1	hypothetical protein [Bacillus pumilus] AMM89376.1 hypothetical protein UP15_10450 [Bacillus pumilus]
gene1176	3.18362	6.36725	0	0	-Inf	1	1	gi|111111112|ref|scaffold2.1|	183428	184714	-	1286	gene1176	GO:0008152;GO:0009987;GO:0009073;GO:0044237;GO:0019752;GO:0044249;GO:0044281;GO:0044283;GO:1901576;GO:0044710;GO:0044711;GO:0071704;GO:0009058;GO:0043436;GO:0006082;GO:0046394;GO:0016053;GO:0043650;GO:0043648;GO:0009423;GO:0046417;GO:0044238;GO:0006807;GO:1901362;GO:1901360;GO:0006520;GO:0006725;GO:0009072;GO:0008652;GO:1901564;GO:1901566;GO:0019438;GO:0016765;GO:0003824;GO:0016740;GO:0003866;GO:…	K00800	ENOG4105CMY	E	sp|A8FEJ4|AROA_BACP2|3-phosphoshikimate 1-carboxyvinyltransferase OS=Bacillus pumilus (strain SAFR-032) OX=315750 GN=aroA PE=3 SV=1	3-phosphoshikimate 1-carboxyvinyltransferase [Bacillus stratosphericus]
gene1177	0.632536	1.26507	0	0	-Inf	1	1	gi|111111112|ref|scaffold2.1|	184725	185840	-	1115	gene1177	GO:0044238;GO:0019752;GO:0044249;GO:0006807;GO:0044281;GO:0044283;GO:1901362;GO:1901360;GO:1901576;GO:0044710;GO:0044711;GO:0006520;GO:0071704;GO:0055114;GO:0009095;GO:1901605;GO:1901607;GO:0008652;GO:0009987;GO:0006725;GO:0009058;GO:0008152;GO:0043436;GO:0009072;GO:0009073;GO:0006570;GO:0006571;GO:1901564;GO:1901566;GO:0006082;GO:0046394;GO:0016053;GO:0044237;GO:0019438;GO:0016491;GO:0016628;GO:…	K04517	ENOG4105EVN	E	sp|P20692|TYRA_BACSU|Prephenate dehydrogenase OS=Bacillus subtilis (strain 168) OX=224308 GN=tyrA PE=3 SV=2	prephenate dehydrogenase [Bacillus sp. UNC125MFCrub1.1]
gene1178	2.82337	5.64675	0	0	-Inf	1	1	gi|111111112|ref|scaffold2.1|	185956	186621	-	665	gene1178	GO:0008152;GO:0009058;GO:0044710;GO:0009987;GO:0044237;GO:0044249;GO:0034641;GO:0006807;GO:0044281;GO:0044283;GO:1901362;GO:1901360;GO:1901576;GO:0044711;GO:0071704;GO:0018130;GO:0006725;GO:0046483;GO:1901564;GO:1901566;GO:0019438;GO:0019752;GO:0000105;GO:0006547;GO:0006520;GO:1901605;GO:1901607;GO:0044238;GO:0043436;GO:0008652;GO:0006082;GO:0046394;GO:0016053;GO:0052803;GO:0009236;GO:0009235;GO:…	K00817	ENOG4105CIH	E	sp|A8FEJ6|HIS8_BACP2|Histidinol-phosphate aminotransferase OS=Bacillus pumilus (strain SAFR-032) OX=315750 GN=hisC PE=3 SV=1	pyridoxal phosphate-dependent aminotransferase [Bacillus altitudinis] OJT57867.1 histidinol-phosphate transaminase [Bacillus altitudinis]
gene1179	0.858741	1.71748	0	0	-Inf	1	1	gi|111111112|ref|scaffold2.1|	187065	187868	-	803	gene1179	GO:0008152;GO:0000162;GO:0019752;GO:0042401;GO:0034641;GO:0006807;GO:0044281;GO:0044283;GO:1901362;GO:1901566;GO:1901360;GO:1901576;GO:0044710;GO:0044711;GO:0006520;GO:0006568;GO:0071704;GO:0046219;GO:0046483;GO:1901605;GO:1901607;GO:0018130;GO:0009308;GO:0009309;GO:0009987;GO:0006725;GO:0006586;GO:0044106;GO:0009058;GO:0042435;GO:1901564;GO:0044238;GO:0042430;GO:0009072;GO:0009073;GO:0008652;GO:…	K01695	ENOG4105F6H	E	sp|A8FEJ7|TRPA_BACP2|Tryptophan synthase alpha chain OS=Bacillus pumilus (strain SAFR-032) OX=315750 GN=trpA PE=3 SV=1	tryptophan synthase subunit alpha [Bacillus altitudinis] OJT57868.1 tryptophan synthase subunit alpha [Bacillus altitudinis]
gene118	0.00418898	0.00837796	0	0	-Inf	1	1	gi|111111111|ref|scaffold1.1|	113755	113985	-	230	gene118	GO:0005737;GO:0044424;GO:0044464;GO:0005623;GO:0005622	-	ENOG4105VPS	S	sp|A8FDQ0|Y1689_BACP2|UPF0291 protein BPUM_1689 OS=Bacillus pumilus (strain SAFR-032) OX=315750 GN=BPUM_1689 PE=3 SV=1	DUF896 family protein [Bacillus pumilus]
gene1180	0.485922	0.971843	0	0	-Inf	1	1	gi|111111112|ref|scaffold2.1|	187865	188995	-	1130	gene1180	GO:0000162;GO:0019752;GO:0042401;GO:0034641;GO:0006807;GO:0044281;GO:0044283;GO:1901362;GO:1901566;GO:1901360;GO:1901576;GO:0044710;GO:0044711;GO:0006520;GO:0006568;GO:0071704;GO:0046219;GO:0046483;GO:1901605;GO:1901607;GO:0018130;GO:0009308;GO:0009309;GO:0009987;GO:0006725;GO:0006586;GO:0044106;GO:0009058;GO:0008152;GO:0042435;GO:1901564;GO:0044238;GO:0042430;GO:0009072;GO:0009073;GO:0008652;GO:…	K01696	ENOG4105CG0	E	sp|A8FEJ8|TRPB_BACP2|Tryptophan synthase beta chain OS=Bacillus pumilus (strain SAFR-032) OX=315750 GN=trpB PE=3 SV=1	tryptophan synthase subunit beta [Streptococcus pneumoniae]
gene1181	0.0921576	0.184315	0	0	-Inf	1	1	gi|111111112|ref|scaffold2.1|	189045	189713	-	668	gene1181	GO:0019752;GO:0034641;GO:0006807;GO:0044281;GO:1901360;GO:0044710;GO:0006520;GO:0006568;GO:0071704;GO:0046483;GO:1901605;GO:0009308;GO:0009987;GO:0006725;GO:0006586;GO:0044106;GO:0008152;GO:1901564;GO:0044238;GO:0042430;GO:0009072;GO:0006576;GO:0006082;GO:0044237;GO:0043436;GO:0000162;GO:0042401;GO:0044283;GO:1901362;GO:1901566;GO:1901576;GO:0044711;GO:0046219;GO:1901607;GO:0018130;GO:0009309;GO:…	K01817	ENOG4108ZGB	E	sp|P20167|TRPF_BACSU|N-(5'-phosphoribosyl)anthranilate isomerase OS=Bacillus subtilis (strain 168) OX=224308 GN=trpF PE=3 SV=3	phosphoribosylanthranilate isomerase [Bacillus pumilus]
gene1182	0.146614	0.293229	0	0	-Inf	1	1	gi|111111112|ref|scaffold2.1|	189710	190363	-	653	gene1182	GO:0006568;GO:0008152;GO:0019752;GO:0034641;GO:0006807;GO:0044281;GO:1901360;GO:0044710;GO:0006520;GO:0071704;GO:0046483;GO:1901605;GO:0009308;GO:0009987;GO:0006725;GO:0006586;GO:0044106;GO:1901564;GO:0044238;GO:0042430;GO:0009072;GO:0006576;GO:0006082;GO:0044237;GO:0043436;GO:0000162;GO:0042401;GO:0044283;GO:1901362;GO:1901566;GO:1901576;GO:0044711;GO:0046219;GO:1901607;GO:0018130;GO:0009309;GO:…	K01609	ENOG4105DK0	E	sp|A8FEK0|TRPC_BACP2|Indole-3-glycerol phosphate synthase OS=Bacillus pumilus (strain SAFR-032) OX=315750 GN=trpC PE=3 SV=1	indole-3-glycerol-phosphate synthase [Bacillus altitudinis] KDE31003.1 indole-3-glycerol-phosphate synthase [Bacillus altitudinis 41KF2b]
gene1183	0.0837796	0.167559	0	0	-Inf	1	1	gi|111111112|ref|scaffold2.1|	190455	191411	-	956	gene1183	GO:0008152;GO:0000162;GO:0019752;GO:0042401;GO:0034641;GO:0006807;GO:0044281;GO:0044283;GO:1901362;GO:1901566;GO:1901360;GO:1901576;GO:0044710;GO:0044711;GO:0006520;GO:0006568;GO:0071704;GO:0046219;GO:0046483;GO:1901605;GO:1901607;GO:0018130;GO:0009308;GO:0009309;GO:0009987;GO:0006725;GO:0006586;GO:0044106;GO:0009058;GO:0042435;GO:1901564;GO:0044238;GO:0042430;GO:0009072;GO:0009073;GO:0008652;GO:…	K00766	ENOG4108I0Q	E	sp|P18261|TRPD_BACPU|Anthranilate phosphoribosyltransferase OS=Bacillus pumilus OX=1408 GN=trpD PE=3 SV=1	anthranilate phosphoribosyltransferase [Bacillus altitudinis] KLV23133.1 anthranilate phosphoribosyltransferase [Bacillus altitudinis]
gene1184	0.196882	0.393764	0	0	-Inf	1	1	gi|111111112|ref|scaffold2.1|	191449	192996	-	1547	gene1184	GO:0009058;GO:0008152;GO:0009987;GO:0044237;GO:0044281;GO:0044710;GO:0043436;GO:1901564;GO:0006807;GO:1901605;GO:0006082;GO:0019752;GO:0006520;GO:0071704;GO:0044238;GO:1901360;GO:0046483;GO:0044249;GO:0006725;GO:0044283;GO:1901362;GO:0044711;GO:1901566;GO:0016053;GO:0019438;GO:1901576;GO:0018130;GO:0008652;GO:0044271;GO:0046394;GO:0034641;GO:1901607;GO:0006568;GO:0000162;GO:0009072;GO:0009073;GO:…	K01657	ENOG4105CRQ	H	sp|P18267|TRPE_BACPU|Anthranilate synthase component 1 OS=Bacillus pumilus OX=1408 GN=trpE PE=3 SV=2	anthranilate synthase component I [Bacillus altitudinis] KDE31001.1 anthranilate synthase component I [Bacillus altitudinis 41KF2b]
gene1185	1.03887	2.07773	0	0	-Inf	1	1	gi|111111112|ref|scaffold2.1|	193229	193612	-	383	gene1185	GO:0008152;GO:0003824;GO:0004106;GO:0016866;GO:0016853	K06208	ENOG4105KHN	E	sp|P19080|AROH_BACSU|Chorismate mutase AroH OS=Bacillus subtilis (strain 168) OX=224308 GN=aroH PE=1 SV=2	chorismate mutase [Bacillus stratosphericus LAMA 585]
gene1186	11.0757	22.1513	0	0	-Inf	1	1	gi|111111112|ref|scaffold2.1|	193609	194700	-	1091	gene1186	GO:0008152;GO:0009987;GO:0044237;GO:0019752;GO:0044249;GO:0044281;GO:0044283;GO:1901576;GO:0044710;GO:0044711;GO:0071704;GO:0009058;GO:0043436;GO:0006082;GO:0046394;GO:0016053;GO:0044238;GO:0006807;GO:1901362;GO:1901360;GO:0006520;GO:0006725;GO:0009072;GO:0009073;GO:0008652;GO:1901564;GO:1901566;GO:0019438;GO:0043650;GO:0043648;GO:0009423;GO:0046417;GO:0016829;GO:0003824;GO:0003856;GO:0016838;GO:…	K01735	ENOG4105D49	E	sp|A8FEK4|AROB_BACP2|3-dehydroquinate synthase OS=Bacillus pumilus (strain SAFR-032) OX=315750 GN=aroB PE=3 SV=1	3-dehydroquinate synthase [Bacillus pumilus]
gene1187	2.86107	5.72215	0	0	-Inf	1	1	gi|111111112|ref|scaffold2.1|	194700	195872	-	1172	gene1187	GO:0044710;GO:0008152;GO:0019752;GO:0044249;GO:0044281;GO:0044283;GO:1901576;GO:0044711;GO:0071704;GO:0009987;GO:0009058;GO:0043436;GO:0006082;GO:0046394;GO:0016053;GO:0044237;GO:0044238;GO:0006807;GO:1901362;GO:1901360;GO:0006520;GO:0006725;GO:0009072;GO:0009073;GO:0008652;GO:1901564;GO:1901566;GO:0019438;GO:0043650;GO:0043648;GO:0009423;GO:0046417;GO:0016829;GO:0004107;GO:0003824;GO:0016838;GO:…	K01736	ENOG4105D10	E	sp|A8FEK5|AROC_BACP2|Chorismate synthase OS=Bacillus pumilus (strain SAFR-032) OX=315750 GN=aroC PE=3 SV=1	chorismate synthase [Bacillus sp. UNC125MFCrub1.1]
gene1188	0.846174	1.69235	0	0	-Inf	1	1	gi|111111112|ref|scaffold2.1|	195949	196746	-	797	gene1188	GO:0023014;GO:0009987;GO:0044699;GO:0044763;GO:0008152;GO:0044237;GO:0071704;GO:0044238;GO:0050789;GO:0065007;GO:0050794;GO:0050896;GO:0051716;GO:0007154;GO:0007165;GO:0044700;GO:0023052;GO:0006796;GO:0006793;GO:0035556;GO:0000160;GO:0043170;GO:0044260;GO:0019538;GO:0044267;GO:0043412;GO:0006464;GO:0036211;GO:0016310;GO:0006468;GO:0006807;GO:0046483;GO:1901360;GO:0006725;GO:0034641;GO:0006139;GO:…	K00575	ENOG4105BZU	T	sp|P31105|CHER_BACSU|Chemotaxis protein methyltransferase OS=Bacillus subtilis (strain 168) OX=224308 GN=cheR PE=1 SV=4	methyl-accepting chemotaxis proteins methyltransferase [Bacillus stratosphericus LAMA 585]
gene1189	0.0167559	0.0335118	0	0	-Inf	1	1	gi|111111112|ref|scaffold2.1|	196870	197316	-	446	gene1189	GO:0046483;GO:0006807;GO:1901360;GO:0008152;GO:0034641;GO:0006139;GO:0009987;GO:0006725;GO:0044237;GO:0071704;GO:0044238;GO:0006796;GO:0006793;GO:0009165;GO:1901362;GO:0044710;GO:0019637;GO:0019438;GO:0044281;GO:1901576;GO:0018130;GO:0034654;GO:0090407;GO:0044271;GO:1901293;GO:0006753;GO:0016310;GO:0044249;GO:0055086;GO:0009058;GO:0009117;GO:0006165;GO:0046939;GO:0009132;GO:0009218;GO:0009163;GO:…	K00940	ENOG4108UGX	F	sp|P31103|NDK_BACSU|Nucleoside diphosphate kinase OS=Bacillus subtilis (strain 168) OX=224308 GN=ndk PE=1 SV=3	nucleoside-diphosphate kinase [Bacillus pumilus] ALM28862.1 nucleoside diphosphate kinase [Bacillus pumilus] ALM45401.1 nucleoside diphosphate kinase [Bacillus pumilus] ANY96880.1 nucleoside diphosphate kinase [Bacillus pumilus]
gene119	0.113102	0.226205	0	0	-Inf	1	1	gi|111111111|ref|scaffold1.1|	114055	114702	-	647	gene119	GO:0006310;GO:0006139;GO:0044260;GO:0044238;GO:0009987;GO:0006725;GO:0044237;GO:0043170;GO:0090304;GO:0071704;GO:0034641;GO:0006807;GO:0008152;GO:0006259;GO:1901360;GO:0046483;GO:0097159;GO:0000150;GO:0003824;GO:0005488;GO:0003676;GO:0003677;GO:1901363	-	ENOG4108SVB	L	sp|Q45057|YNEB_BACSU|Resolvase homolog YneB OS=Bacillus subtilis (strain 168) OX=224308 GN=yneB PE=2 SV=1	resolvase [Bacillus pumilus] ALM29199.1 resolvase [Bacillus pumilus] ALM45737.1 resolvase [Bacillus pumilus] ANY97217.1 resolvase [Bacillus pumilus]
gene1190	0.385386	0.770772	0	0	-Inf	1	1	gi|111111112|ref|scaffold2.1|	197446	198408	-	962	gene1190	GO:0008152;GO:0044249;GO:0009987;GO:0009058;GO:0044237;GO:1901576;GO:0044710;GO:0071704;GO:0006629;GO:0006720;GO:0044255;GO:0008610;GO:0044238;GO:0008299;GO:0016740;GO:0003824;GO:0016765;GO:0000010;GO:0004659	K00805	ENOG4105EAH	H	sp|P31114|HEPS2_BACSU|Heptaprenyl diphosphate synthase component 2 OS=Bacillus subtilis (strain 168) OX=224308 GN=hepT PE=1 SV=1	heptaprenyl diphosphate synthase component II [Bacillus sp. RRD69] SIT89930.1 heptaprenyl diphosphate synthase [Bacillus sp. RRD69]
gene1191	2.22435	4.4487	0	0	-Inf	1	1	gi|111111112|ref|scaffold2.1|	198433	199137	-	704	gene1191	GO:0032259;GO:0008152;GO:0044710;GO:0009987;GO:0044237;GO:0044249;GO:0044281;GO:0044283;GO:1901576;GO:0044711;GO:1901663;GO:1901661;GO:0071704;GO:0009058;GO:0042181;GO:0042180;GO:0009234;GO:0009233;GO:0006732;GO:0006733;GO:0009108;GO:0045426;GO:0051188;GO:0042375;GO:0006743;GO:0051186;GO:0006744;GO:0009060;GO:0006091;GO:0045333;GO:0055114;GO:0015980;GO:0008168;GO:0016740;GO:0016741;GO:0003824;GO:…	K03183	ENOG4105DDZ	H	sp|A8FEK9|MENG_BACP2|Demethylmenaquinone methyltransferase OS=Bacillus pumilus (strain SAFR-032) OX=315750 GN=menG PE=3 SV=1	bifunctional demethylmenaquinone methyltransferase/2-methoxy-6-polyprenyl-1,4-benzoquinol methylase [Bacillus australimaris] KPN15419.1 demethylmenaquinone methyltransferase [Bacillus australimaris]
gene1192	2.55528	5.11056	0	0	-Inf	1	1	gi|111111112|ref|scaffold2.1|	199141	199779	-	638	gene1192	GO:0008152;GO:0003824;GO:0016740;GO:0016765;GO:0000010	K00805	ENOG4105XXQ	I	sp|P31112|HEPS1_BACSU|Heptaprenyl diphosphate synthase component 1 OS=Bacillus subtilis (strain 168) OX=224308 GN=hepS PE=1 SV=1	Heptaprenyl diphosphate synthase component 1 [Streptococcus pneumoniae]
gene1193	2.53433	5.06867	0	0	-Inf	1	1	gi|111111112|ref|scaffold2.1|	200278	200847	-	569	gene1193	GO:0008152;GO:0044281;GO:1901360;GO:0044710;GO:0046483;GO:1901564;GO:0006807;GO:0009987;GO:0071704;GO:0044237;GO:1901362;GO:1901566;GO:1901576;GO:0018130;GO:0044271;GO:0044249;GO:0034641;GO:0006725;GO:0009058;GO:0044238;GO:0019438;GO:0009396;GO:0044283;GO:0044711;GO:0006760;GO:0043436;GO:0006575;GO:0051186;GO:0042558;GO:0006732;GO:1901605;GO:0006082;GO:0019752;GO:0006520;GO:0016053;GO:0042398;GO:…	K01495	ENOG4105EUJ	H	sp|A8FEL2|GCH1_BACP2|GTP cyclohydrolase 1 OS=Bacillus pumilus (strain SAFR-032) OX=315750 GN=folE PE=3 SV=1	GTP cyclohydrolase I FolE [Bacillus safensis] OUE34560.1 GTP cyclohydrolase I FolE [Bacillus safensis]
gene1194	0.745638	1.49128	0	0	-Inf	1	1	gi|111111112|ref|scaffold2.1|	201038	201316	-	278	gene1194	GO:0009987;GO:0008152;GO:0034641;GO:0006807;GO:0006139;GO:0090304;GO:0044260;GO:1901360;GO:0071704;GO:0006725;GO:0046483;GO:0044238;GO:0044237;GO:0043170;GO:0071103;GO:0016043;GO:0071840;GO:0006323;GO:0006259;GO:0044699;GO:0044763;GO:0030261;GO:0006996;GO:0051276;GO:0097159;GO:0005488;GO:0003676;GO:0003677;GO:1901363	K03530	ENOG4105K70	L	sp|P08821|DBH1_BACSU|DNA-binding protein HU 1 OS=Bacillus subtilis (strain 168) OX=224308 GN=hupA PE=1 SV=2	dna-binding protein hu [Bacillus stratosphericus LAMA 585]
gene1195	0.0418898	0.0837796	0	0	-Inf	1	1	gi|111111112|ref|scaffold2.1|	201315	201497	+	182	gene1195	-	-	-	-	-	hypothetical protein [Bacillus pumilus]
gene1196	0.242961	0.485922	0	0	-Inf	1	1	gi|111111112|ref|scaffold2.1|	201691	203058	-	1367	gene1196	GO:0006200;GO:0032502;GO:0043934;GO:0030154;GO:0044699;GO:0009653;GO:0048869;GO:0048646;GO:0009987;GO:0030435;GO:0048856;GO:0044767;GO:0044763;GO:0055086;GO:0046434;GO:0009141;GO:0009143;GO:0009144;GO:0009146;GO:0009166;GO:0009167;GO:0009128;GO:0006807;GO:1901360;GO:0044237;GO:0009161;GO:0009123;GO:0006195;GO:0009126;GO:0009259;GO:0009125;GO:0046700;GO:0006139;GO:0044710;GO:1901565;GO:0046130;GO:…	K06398	ENOG4105DXU	S	sp|P35149|SP4A_BACSU|Stage IV sporulation protein A OS=Bacillus subtilis (strain 168) OX=224308 GN=spoIVA PE=1 SV=1	stage iv sporulation protein a [Bacillus stratosphericus LAMA 585]
gene1197	0.222016	0.444032	0	0	-Inf	1	1	gi|111111112|ref|scaffold2.1|	203375	204100	-	725	gene1197	-	-	ENOG4108XFK	S	sp|P39911|YPHF_BACSU|Uncharacterized protein YphF OS=Bacillus subtilis (strain 168) OX=224308 GN=yphF PE=4 SV=2	hypothetical protein [Bacillus pumilus] AKU32775.1 hypothetical protein ID12_15625 [Bacillus pumilus]
gene1198	0.146614	0.293229	0	0	-Inf	1	1	gi|111111112|ref|scaffold2.1|	204119	204322	-	203	gene1198	-	-	ENOG410687J	S	sp|P50744|YPHE_BACSU|Uncharacterized protein YphE OS=Bacillus subtilis (strain 168) OX=224308 GN=yphE PE=4 SV=1	hypothetical protein [Bacillus pumilus] ABV62683.1 hypothetical protein BPUM_2013 [Bacillus pumilus SAFR-032]
gene12	2.06098	4.12196	0	0	-Inf	1	1	gi|111111111|ref|scaffold1.1|	13067	14407	-	1340	gene12	GO:0008152;GO:0044710;GO:0055114;GO:0006810;GO:0051234;GO:0051179;GO:0016491;GO:0003824;GO:0051536;GO:0005488;GO:0051540;GO:0016614;GO:0043169;GO:0043167;GO:0046872;GO:0051539;GO:0016020	K11473	ENOG4105CHG	C	sp|P94534|GLCF_BACSU|Probable glycolate oxidase iron-sulfur subunit OS=Bacillus subtilis (strain 168) OX=224308 GN=glcF PE=4 SV=1	glycolate oxidase [Bacillus stratosphericus] KOA80494.1 glycolate oxidase [Bacillus stratosphericus]
gene1200	15.4238	30.8476	0	0	-Inf	1	1	gi|111111112|ref|scaffold2.1|	204590	205627	-	1037	gene1200	GO:0006072;GO:0044710;GO:0008152;GO:0071704;GO:0055114;GO:0009987;GO:0044238;GO:0044237;GO:0006796;GO:0006793;GO:0019637;GO:0044249;GO:1901576;GO:0090407;GO:0006644;GO:0006629;GO:0009058;GO:0044255;GO:0008610;GO:0008654;GO:0052646;GO:1901135;GO:0006650;GO:0046486;GO:0005975;GO:0046434;GO:0046168;GO:1901575;GO:0009056;GO:1901136;GO:0046167;GO:1901137;GO:0050662;GO:0016616;GO:0016491;GO:0003824;GO:…	K00057	ENOG4105CSF	C	sp|A8FEL7|GPDA_BACP2|Glycerol-3-phosphate dehydrogenase [NAD(P)+] OS=Bacillus pumilus (strain SAFR-032) OX=315750 GN=gpsA PE=3 SV=1	glycerol-3-phosphate dehydrogenase [Bacillus altitudinis] OPW94512.1 glycerol-3-phosphate dehydrogenase [Bacillus altitudinis]
gene1201	12.546	25.092	0	0	-Inf	1	1	gi|111111112|ref|scaffold2.1|	205642	207000	-	1358	gene1201	GO:0042254;GO:0071840;GO:0022613;GO:0044085;GO:0008152;GO:0009987;GO:0005488;GO:0035639;GO:0000166;GO:1901363;GO:0001883;GO:0001882;GO:0043168;GO:0019001;GO:0043167;GO:0032561;GO:1901265;GO:0032549;GO:0017076;GO:0005525;GO:0036094;GO:0097159;GO:0032555;GO:0032550;GO:0032553;GO:0003824;GO:0016787;GO:0017111;GO:0016818;GO:0016817;GO:0016462	K03977	ENOG4105DKZ	F	sp|A8FEL8|DER_BACP2|GTPase Der OS=Bacillus pumilus (strain SAFR-032) OX=315750 GN=der PE=3 SV=1	gtp-binding protein [Bacillus stratosphericus LAMA 585]
gene1203	0.0377008	0.0754016	0	0	-Inf	1	1	gi|111111112|ref|scaffold2.1|	207313	208197	-	884	gene1203	-	K05739	ENOG4105S2F	S	sp|P50742|YPHB_BACSU|Uncharacterized protein YphB OS=Bacillus subtilis (strain 168) OX=224308 GN=yphB PE=4 SV=1	membrane protein [Bacillus pumilus] KML13005.1 membrane protein [Bacillus pumilus] KML50219.1 membrane protein [Bacillus pumilus] KMN78693.1 membrane protein [Bacillus pumilus]
gene1204	0.0293229	0.0586457	0	0	-Inf	1	1	gi|111111112|ref|scaffold2.1|	208194	208751	-	557	gene1204	-	-	-	-	sp|P50741|YPHA_BACSU|Uncharacterized protein YphA OS=Bacillus subtilis (strain 168) OX=224308 GN=yphA PE=4 SV=1	integral inner membrane protein [Bacillus pumilus] CVM13224.1 Uncharacterised protein [Streptococcus pneumoniae] SCC22408.1 hypothetical protein GA0061086_10521 [Bacillus sp. nio-1130]
gene1205	0.00837796	0.0167559	0	0	-Inf	1	1	gi|111111112|ref|scaffold2.1|	208915	209046	+	131	gene1205	-	-	ENOG4107E3H	S	sp|C0H446|YPZI_BACSU|Uncharacterized protein YpzI OS=Bacillus subtilis (strain 168) OX=224308 GN=ypzI PE=4 SV=1	hypothetical protein BN2127_JRS3_02786 [Bacillus pumilus]
gene1206	6.22482	12.4496	0	0	-Inf	1	1	gi|111111112|ref|scaffold2.1|	209220	210101	-	881	gene1206	GO:0055114;GO:0008152;GO:0044249;GO:0044710;GO:0071704;GO:0006629;GO:1901576;GO:0006720;GO:0009987;GO:0009058;GO:0044255;GO:0008610;GO:0044238;GO:0044237;GO:0008299;GO:0016853;GO:0005488;GO:0000166;GO:0016863;GO:1901363;GO:1901265;GO:0043168;GO:0050662;GO:0043167;GO:0010181;GO:0016860;GO:0036094;GO:0003824;GO:0048037;GO:0097159;GO:0004452;GO:0032553;GO:0016491;GO:0005737;GO:0044424;GO:0044464;GO:…	K01823	ENOG4106UJV	C	sp|A8FEM3|IDI2_BACP2|Isopentenyl-diphosphate delta-isomerase OS=Bacillus pumilus (strain SAFR-032) OX=315750 GN=fni PE=3 SV=1	isopentenyl-diphosphate delta-isomerase [Bacillus sp. RRD69]
gene1208	1.18129	2.36258	0	0	-Inf	1	1	gi|111111112|ref|scaffold2.1|	211677	212354	-	677	gene1208	GO:0044281;GO:1901360;GO:0044710;GO:0055086;GO:0046483;GO:0019637;GO:0006807;GO:0008152;GO:0006753;GO:0034641;GO:0006139;GO:0009987;GO:0006725;GO:0044237;GO:0071704;GO:0009117;GO:0044238;GO:0006796;GO:0006793;GO:0016310;GO:0046939;GO:1901564;GO:0006220;GO:0072527;GO:0016740;GO:0016301;GO:0003824;GO:0016772;GO:0019201;GO:0019205;GO:0004127;GO:0035639;GO:0005488;GO:0043167;GO:1901363;GO:0001883;GO:…	K00945	ENOG4105CAT	F	sp|A8FEM5|KCY_BACP2|Cytidylate kinase OS=Bacillus pumilus (strain SAFR-032) OX=315750 GN=cmk PE=3 SV=1	cytidylate kinase [Bacillus sp. M 2-6] EIL85052.1 cytidylate kinase [Bacillus sp. M 2-6]
gene1209	0.0712127	0.142425	0	0	-Inf	1	1	gi|111111112|ref|scaffold2.1|	212426	212608	-	182	gene1209	-	-	-	-	sp|P38492|YPFB_BACSU|Uncharacterized protein YpfB OS=Bacillus subtilis (strain 168) OX=224308 GN=ypfB PE=4 SV=1	hypothetical protein [Bacillus xiamenensis] EKF34133.1 hypothetical protein BA1_16681 [Bacillus xiamenensis] AOZ90219.1 hypothetical protein BK049_16815 [Bacillus xiamenensis]
gene121	1.03887	2.07773	0	0	-Inf	1	1	gi|111111111|ref|scaffold1.1|	115191	115811	+	620	gene121	GO:0008152;GO:0006355;GO:0043170;GO:0071704;GO:0044238;GO:0009987;GO:0080090;GO:0019222;GO:0060255;GO:2001141;GO:0050789;GO:0065007;GO:0009889;GO:0050794;GO:0010556;GO:0051252;GO:0031326;GO:0031323;GO:2000112;GO:0010468;GO:0019219;GO:0051171;GO:0051716;GO:0033554;GO:0006950;GO:0044699;GO:0006974;GO:0050896;GO:0044763;GO:1901360;GO:0046483;GO:0031668;GO:0009605;GO:0006807;GO:0044260;GO:0034641;GO:…	K01356	ENOG4105DS7	K	sp|A8FDP7|LEXA_BACP2|LexA repressor OS=Bacillus pumilus (strain SAFR-032) OX=315750 GN=lexA PE=3 SV=1	repressor LexA [Bacillus zhangzhouensis] KEP25523.1 XRE family transcriptional regulator [Bacillus zhangzhouensis]
gene1210	2.78567	5.57134	0	0	-Inf	1	1	gi|111111112|ref|scaffold2.1|	212672	213319	-	647	gene1210	GO:0043168;GO:0030551;GO:0032561;GO:0097159;GO:0035438;GO:1901265;GO:0000166;GO:0036094;GO:0019001;GO:0005488;GO:0032555;GO:0017076;GO:0043167;GO:1901363;GO:0032553	-	ENOG410865A	U	sp|P38491|YPFA_BACSU|Uncharacterized protein YpfA OS=Bacillus subtilis (strain 168) OX=224308 GN=ypfA PE=1 SV=1	pilus assembly protein PilZ [Bacillus sp. UNC125MFCrub1.1]
gene1211	0.284851	0.569701	0	0	-Inf	1	1	gi|111111112|ref|scaffold2.1|	213422	214771	-	1349	gene1211	GO:0032502;GO:0009847	K06313	ENOG4105MSI	S	sp|P38490|YPEB_BACSU|Sporulation protein YpeB OS=Bacillus subtilis (strain 168) OX=224308 GN=ypeB PE=1 SV=2	germination protein YpeB [Bacillus sp. RRD69] SIT90021.1 spore germination protein [Bacillus sp. RRD69]
gene1212	0.117291	0.234583	0	0	-Inf	1	1	gi|111111112|ref|scaffold2.1|	214788	215699	-	911	gene1212	GO:0008152;GO:0009847;GO:0032502;GO:0044699;GO:0009987;GO:0044763;GO:0044248;GO:0044036;GO:0071840;GO:0044260;GO:0016998;GO:0071554;GO:0071704;GO:0009056;GO:0044237;GO:0043170;GO:0003824;GO:0016787;GO:0005618;GO:0044464;GO:0005623;GO:0071944;GO:0030312	K01449	ENOG4105F0V	M	sp|P50739|SLEB_BACSU|Spore cortex-lytic enzyme OS=Bacillus subtilis (strain 168) OX=224308 GN=sleB PE=1 SV=1	spore cortex-lytic enzyme [Bacillus stratosphericus] KOA73824.1 spore cortex-lytic protein [Bacillus stratosphericus]
gene1213	1.57925	3.15849	0	0	-Inf	1	1	gi|111111112|ref|scaffold2.1|	215832	216488	-	656	gene1213	GO:0008152;GO:0044238;GO:0019538;GO:0043170;GO:0071704;GO:0006508;GO:0016787;GO:0003824;GO:0008233;GO:0016020;GO:0044464;GO:0005623;GO:0071944;GO:0005886;GO:0016021;GO:0044425;GO:0031224	-	ENOG4108PNU	S	sp|P50738|PRSW_BACSU|Protease PrsW OS=Bacillus subtilis (strain 168) OX=224308 GN=prsW PE=1 SV=1	protease required for anti-sigma degradation [Bacillus stratosphericus LAMA 585]
gene1214	2.29975	4.5995	0	0	-Inf	1	1	gi|111111112|ref|scaffold2.1|	216644	217615	-	971	gene1214	GO:0044710;GO:0055114;GO:0008152;GO:0016491;GO:0003824;GO:0005488;GO:0016667;GO:0016668;GO:0004791;GO:0016209;GO:0016651;GO:0051540;GO:0051536	K00384	ENOG4105E4T	O	sp|P50736|YPDA_BACSU|Uncharacterized protein YpdA OS=Bacillus subtilis (strain 168) OX=224308 GN=ypdA PE=4 SV=2	hypothetical protein [Bacillus sp. UNC125MFCrub1.1]
gene1215	46.2422	92.4843	0	0	-Inf	1	1	gi|111111112|ref|scaffold2.1|	217740	219014	-	1274	gene1215	GO:0044710;GO:0008152;GO:0006520;GO:0043436;GO:1901564;GO:0044281;GO:0006807;GO:0009987;GO:0006082;GO:0019752;GO:0071704;GO:0044238;GO:0044237;GO:0055114;GO:0016491;GO:0003824;GO:0016639;GO:0016638	K00260	ENOG4105D82	E	sp|P50735|GUDB_BACSU|Cryptic catabolic NAD-specific glutamate dehydrogenase GudB OS=Bacillus subtilis (strain 168) OX=224308 GN=gudB PE=1 SV=2	glutamate dehydrogenase [Bacillus pumilus] EDW20867.1 NAD-specific glutamate dehydrogenase (NAD-GDH) [Bacillus pumilus ATCC 7061] KIL17136.1 NAD-specific glutamate dehydrogenase [Bacillus pumilus] KMY22075.1 glutamate dehydrogenase [Bacillus pumilus]
gene1216	2.30394	4.60788	0	0	-Inf	1	1	gi|111111112|ref|scaffold2.1|	219211	219789	-	578	gene1216	GO:0009991;GO:0032105;GO:0032102;GO:0022603;GO:0048585;GO:0030420;GO:0043937;GO:0032104;GO:0042174;GO:0071496;GO:0010648;GO:0042173;GO:0009292;GO:0010646;GO:0009294;GO:0045304;GO:0044699;GO:0051716;GO:0032101;GO:0050789;GO:0065007;GO:0048519;GO:0050793;GO:0048583;GO:0009987;GO:0050794;GO:0043900;GO:0044764;GO:0044763;GO:0007154;GO:0043939;GO:0051704;GO:0051093;GO:0031668;GO:0009605;GO:0045596;GO:…	K16511	ENOG4108S6Z	S	sp|P50734|MECA2_BACSU|Adapter protein MecA 2 OS=Bacillus subtilis (strain 168) OX=224308 GN=mecB PE=1 SV=1	adapter protein MecA [Bacillus xiamenensis] EKF34126.1 adaptor protein [Bacillus xiamenensis] AOZ90212.1 adaptor protein [Bacillus xiamenensis]
gene1217	0.754016	1.50803	0	0	-Inf	1	1	gi|111111112|ref|scaffold2.1|	219954	220742	-	788	gene1217	GO:0008152;GO:0003824;GO:0016787	K07098	ENOG4107HCV	S	sp|P50733|YPBG_BACSU|Uncharacterized protein YpbG OS=Bacillus subtilis (strain 168) OX=224308 GN=ypbG PE=2 SV=1	hypothetical protein [Bacillus pumilus] AMM89416.1 hypothetical protein UP15_10650 [Bacillus pumilus]
gene1218	0.0586457	0.117291	0	0	-Inf	1	1	gi|111111112|ref|scaffold2.1|	220830	221282	-	452	gene1218	-	-	ENOG4107AMV	S	sp|P50732|YPBF_BACSU|Uncharacterized protein YpbF OS=Bacillus subtilis (strain 168) OX=224308 GN=ypbF PE=4 SV=1	hypothetical protein [Bacillus pumilus] AKU32794.1 hypothetical protein ID12_15725 [Bacillus pumilus]
gene1219	0.213638	0.427276	0	0	-Inf	1	1	gi|111111112|ref|scaffold2.1|	221347	222117	-	770	gene1219	-	-	-	-	sp|P50731|YPBE_BACSU|Uncharacterized protein YpbE OS=Bacillus subtilis (strain 168) OX=224308 GN=ypbE PE=4 SV=1	cell wall hydrolase lytn [Bacillus stratosphericus LAMA 585]
gene122	0.0754016	0.150803	0	0	-Inf	1	1	gi|111111111|ref|scaffold1.1|	115859	116302	-	443	gene122	-	-	-	-	-	Uncharacterised protein [Streptococcus pneumoniae]
gene1220	3.53969	7.07938	0	0	-Inf	1	1	gi|111111112|ref|scaffold2.1|	222694	224178	-	1484	gene1220	GO:0008152;GO:0044237;GO:1901360;GO:0046483;GO:0006807;GO:0034641;GO:0006139;GO:0009987;GO:0006725;GO:0071704;GO:0044238;GO:0044260;GO:0043170;GO:0090304;GO:0006259;GO:0044710;GO:0046434;GO:0009166;GO:0009167;GO:0009164;GO:0044281;GO:0009161;GO:0046130;GO:0009169;GO:0009199;GO:0042454;GO:0009207;GO:0009205;GO:0009203;GO:0046034;GO:0046128;GO:1901564;GO:1901565;GO:0009128;GO:0006163;GO:0019637;GO:…	K03654	ENOG4105C9U	L	sp|P50729|RECS_BACSU|Probable ATP-dependent DNA helicase RecS OS=Bacillus subtilis (strain 168) OX=224308 GN=recS PE=3 SV=1	ATP-dependent DNA helicase [Bacillus sp. UNC125MFCrub1.1]
gene1221	2.63906	5.27811	0	0	-Inf	1	1	gi|111111112|ref|scaffold2.1|	224195	225316	-	1121	gene1221	-	-	ENOG4105T7X	S	sp|P50728|YPBB_BACSU|Uncharacterized protein YpbB OS=Bacillus subtilis (strain 168) OX=224308 GN=ypbB PE=4 SV=1	atp-dependent dna helicase recq [Bacillus stratosphericus LAMA 585]
gene1222	0.343496	0.686993	0	0	-Inf	1	1	gi|111111112|ref|scaffold2.1|	225519	225767	+	248	gene1222	GO:0043169;GO:0051540;GO:0046914;GO:0051536;GO:0043167;GO:0005488;GO:0005506;GO:0046872;GO:0009055	K05337	ENOG4105XPU	C	sp|P10245|FER_BACTH|Ferredoxin OS=Bacillus thermoproteolyticus OX=1427 PE=1 SV=1	Ferredoxin [Bacillus pumilus]
gene1223	4.87178	9.74357	0	0	-Inf	1	1	gi|111111112|ref|scaffold2.1|	225802	226317	-	515	gene1223	GO:0006810;GO:0051234;GO:0051179;GO:0071705;GO:0051180;GO:0032218;GO:0006811;GO:0015711;GO:0044765;GO:0006820;GO:0071702;GO:0044699;GO:0005215;GO:0051183;GO:0032217;GO:0016020;GO:0044464;GO:0005623;GO:0071944;GO:0005886	K23675	ENOG4108SAX	S	sp|P50726|FMNP_BACSU|Riboflavin transporter FmnP OS=Bacillus subtilis (strain 168) OX=224308 GN=fmnP PE=1 SV=1	riboflavin transporter FmnP [Bacillus pumilus] KKK10085.1 riboflavin transporter FmnP [Bacillus sp. L_1B0_12] KLV23231.1 riboflavin transporter FmnP [Bacillus altitudinis] KOA73834.1 riboflavin transporter FmnP [Bacillus stratosphericus] KQL38699.1 riboflavin transporter FmnP [Bacillus sp. FJAT-21955] KQU12626.1 riboflavin transporter FmnP [Bacillus sp. Leaf49] ALM30157.1 riboflavin transporter F…
gene1224	43.7707	87.5413	0	0	-Inf	1	1	gi|111111112|ref|scaffold2.1|	226923	228527	+	1604	gene1224	GO:0008152;GO:0044710;GO:0055114;GO:0019752;GO:0006807;GO:0044281;GO:0006520;GO:0071704;GO:0044238;GO:0009987;GO:0043436;GO:1901564;GO:0006082;GO:0044237;GO:0044249;GO:0044283;GO:0009069;GO:1901576;GO:0044711;GO:0006563;GO:1901605;GO:1901607;GO:0009058;GO:0006564;GO:0009070;GO:0008652;GO:1901566;GO:0046394;GO:0016053;GO:0016616;GO:0016491;GO:0003824;GO:0016614;GO:0005488;GO:0048037;GO:0051287;GO:…	K00058	ENOG4108JQ1	E	sp|P35136|SERA_BACSU|D-3-phosphoglycerate dehydrogenase OS=Bacillus subtilis (strain 168) OX=224308 GN=serA PE=3 SV=3	d-3-phosphoglycerate dehydrogenase [Bacillus stratosphericus LAMA 585]
gene1225	0.318362	0.636725	0	0	-Inf	1	1	gi|111111112|ref|scaffold2.1|	228560	229207	-	647	gene1225	GO:0008152;GO:0043170;GO:0071704;GO:0009056;GO:0009987;GO:0044699;GO:0044763;GO:0044260;GO:0044237;GO:0071840;GO:0044036;GO:0071554;GO:0016998;GO:0044248;GO:0003824;GO:0016787	-	ENOG4105DR5	M	sp|Q46798|YGER_ECOLI|Uncharacterized lipoprotein YgeR OS=Escherichia coli (strain K12) OX=83333 GN=ygeR PE=3 SV=2	peptidase%2C M23/M37 family [Streptococcus pneumoniae]
gene1226	4.09263	8.18527	0	0	-Inf	1	1	gi|111111112|ref|scaffold2.1|	229505	230500	-	995	gene1226	-	-	ENOG4108SFD	S	sp|P35166|RSIX_BACSU|Anti-sigma-X factor RsiX OS=Bacillus subtilis (strain 168) OX=224308 GN=rsiX PE=1 SV=2	hypothetical protein [Bacillus pumilus] AKC66472.1 sigma X negative regulator [Bacillus pumilus] ALM28827.1 sigma X negative regulator [Bacillus pumilus] ALM45366.1 sigma X negative regulator [Bacillus pumilus] ANY96845.1 sigma X negative regulator [Bacillus pumilus]
gene1227	0.590646	1.18129	0	0	-Inf	1	1	gi|111111112|ref|scaffold2.1|	230571	231131	-	560	gene1227	GO:0032774;GO:0019222;GO:0031326;GO:0031323;GO:0090304;GO:0044249;GO:0034641;GO:0006807;GO:0034645;GO:1901362;GO:0050789;GO:1901360;GO:0080090;GO:0006139;GO:0044260;GO:0071704;GO:2000112;GO:0060255;GO:0010467;GO:0065007;GO:0010468;GO:0018130;GO:1901576;GO:0019219;GO:0006725;GO:0009987;GO:0009889;GO:0050794;GO:0009058;GO:0009059;GO:0051171;GO:0008152;GO:2001141;GO:0034654;GO:0046483;GO:0016070;GO:…	K03088	ENOG4108RKY	K	sp|P35165|SIGX_BACSU|ECF RNA polymerase sigma factor SigX OS=Bacillus subtilis (strain 168) OX=224308 GN=sigX PE=1 SV=2	RNA polymerase sigma factor SigX [Bacillus xiamenensis] EKF34851.1 RNA polymerase sigma factor SigX [Bacillus xiamenensis] AOZ90200.1 RNA polymerase sigma factor SigX [Bacillus xiamenensis]
gene1228	74.8655	149.731	0	0	-Inf	1	1	gi|111111112|ref|scaffold2.1|	231334	233115	-	1781	gene1228	GO:0023014;GO:0009987;GO:0044699;GO:0044763;GO:0008152;GO:0044237;GO:0071704;GO:0044238;GO:0050789;GO:0065007;GO:0050794;GO:0050896;GO:0051716;GO:0007154;GO:0007165;GO:0044700;GO:0023052;GO:0006796;GO:0006793;GO:0035556;GO:0000160;GO:0043170;GO:0044260;GO:0019538;GO:0044267;GO:0043412;GO:0006464;GO:0036211;GO:0016310;GO:0006468;GO:0006807;GO:0046483;GO:1901360;GO:0006725;GO:0034641;GO:0006139;GO:…	K07651	ENOG4105BZU	T	sp|P35164|RESE_BACSU|Sensor histidine kinase ResE OS=Bacillus subtilis (strain 168) OX=224308 GN=resE PE=1 SV=1	PAS domain-containing sensor histidine kinase [Bacillus pumilus] AKC66474.1 histidine kinase [Bacillus pumilus]
gene1229	12.7596	25.5193	0	0	-Inf	1	1	gi|111111112|ref|scaffold2.1|	233112	233834	-	722	gene1229	GO:0035556;GO:0050789;GO:0065007;GO:0050794;GO:0080090;GO:0019222;GO:0060255;GO:2001141;GO:0009889;GO:0006355;GO:0051252;GO:0031326;GO:0031323;GO:2000112;GO:0010556;GO:0010468;GO:0019219;GO:0051171;GO:0050896;GO:0009987;GO:0044699;GO:0044763;GO:0051716;GO:0007154;GO:0007165;GO:0000160;GO:0044700;GO:0023052;GO:0008152;GO:0044237;GO:0071704;GO:0044238;GO:1901576;GO:0009058;GO:0044249;GO:0044260;GO:…	K07775	ENOG4105CK6	T	sp|P35163|RESD_BACSU|Transcriptional regulatory protein ResD OS=Bacillus subtilis (strain 168) OX=224308 GN=resD PE=3 SV=2	DNA-binding response regulator [Bacillus xiamenensis] EKF34849.1 response regulator [Bacillus xiamenensis] AOZ90198.1 DNA-binding response regulator [Bacillus xiamenensis]
gene1230	8.42823	16.8565	0	0	-Inf	1	1	gi|111111112|ref|scaffold2.1|	233921	234850	-	929	gene1230	GO:0022607;GO:0070271;GO:0043933;GO:0034622;GO:0065003;GO:0071822;GO:0016043;GO:0071840;GO:0006461;GO:0043623;GO:0044085;GO:0008535;GO:0017004;GO:0044699;GO:0051181;GO:0071705;GO:0071702;GO:0006810;GO:0044765;GO:0051234;GO:0051179;GO:1901678;GO:0015886;GO:0005215;GO:0015232;GO:0051184;GO:0016020;GO:0016021;GO:0044425;GO:0031224;GO:0044464;GO:0005623;GO:0009579;GO:0005622;GO:0044436;GO:0044424;GO:…	-	ENOG4105CRE	O	sp|P35162|RESC_BACSU|Cytochrome c biogenesis protein ResC OS=Bacillus subtilis (strain 168) OX=224308 GN=resC PE=3 SV=2	c-type cytochrome biogenesis protein CcsB [Bacillus pumilus] BAT49193.1 cytochrome c biogenesis protein ResC [Bacillus pumilus] APP16660.1 c-type cytochrome biogenesis protein CcsB [Bacillus pumilus]
gene1231	2.30394	4.60788	0	0	-Inf	1	1	gi|111111112|ref|scaffold2.1|	235083	236762	-	1679	gene1231	GO:0044464;GO:0005623;GO:0005622	K07399	ENOG4107TWT	O	sp|P35161|RESB_BACSU|Cytochrome c biogenesis protein ResB OS=Bacillus subtilis (strain 168) OX=224308 GN=resB PE=4 SV=1	cytochrome c biogenesis protein [Bacillus altitudinis] KDE30954.1 cytochrome c biogenesis protein ResB [Bacillus altitudinis 41KF2b]
gene1232	0.607402	1.2148	0	0	-Inf	1	1	gi|111111112|ref|scaffold2.1|	236764	237363	-	599	gene1232	GO:0055114;GO:0044710;GO:0008152;GO:0042592;GO:0050789;GO:0044699;GO:0065007;GO:0065008;GO:0019725;GO:0009987;GO:0050794;GO:0044763;GO:0045454;GO:0071704;GO:0018904;GO:0044281;GO:0006662;GO:0016491;GO:0003824;GO:0016209;GO:0016667;GO:0015036;GO:0009055;GO:0015035	-	ENOG4105KJP	O	sp|P35160|RESA_BACSU|Thiol-disulfide oxidoreductase ResA OS=Bacillus subtilis (strain 168) OX=224308 GN=resA PE=1 SV=2	thiol-disulfide oxidoreductase [Bacillus stratosphericus LAMA 585]
gene1233	2.63068	5.26136	0	0	-Inf	1	1	gi|111111112|ref|scaffold2.1|	237385	238119	-	734	gene1233	GO:0009451;GO:0090304;GO:0034641;GO:0006807;GO:0001522;GO:1901360;GO:0006139;GO:0044260;GO:0071704;GO:0009987;GO:0006725;GO:0043412;GO:0008152;GO:0046483;GO:0016070;GO:0044238;GO:0044237;GO:0043170;GO:0003824;GO:0016853;GO:0009982;GO:0016866;GO:0097159;GO:0003723;GO:0003676;GO:1901363;GO:0005488;GO:0016829	K06178	ENOG4105FE9	J	sp|P35159|RLUB_BACSU|Ribosomal large subunit pseudouridine synthase B OS=Bacillus subtilis (strain 168) OX=224308 GN=rluB PE=1 SV=2	rRNA pseudouridine synthase [Bacillus altitudinis] KDE30952.1 pseudouridylate synthase [Bacillus altitudinis 41KF2b]
gene1234	0.00837796	0.0167559	0	0	-Inf	1	1	gi|111111112|ref|scaffold2.1|	238254	238628	-	374	gene1234	GO:0036094;GO:0097159;GO:1901363;GO:0005488;GO:0001882	K06374	ENOG4105DX7	S	sp|P35158|SPMB_BACSU|Spore maturation protein B OS=Bacillus subtilis (strain 168) OX=224308 GN=spmB PE=1 SV=2	spore maturation protein B [Bacillus sp. M 2-6] EMI12116.1 spore maturation protein b [Bacillus stratosphericus LAMA 585]
gene1235	0.0209449	0.0418898	0	0	-Inf	1	1	gi|111111112|ref|scaffold2.1|	238795	239331	-	536	gene1235	GO:0036094;GO:0097159;GO:1901363;GO:0005488;GO:0001882	K06373	ENOG4108JIC	S	sp|P35157|SPMA_BACSU|Spore maturation protein A OS=Bacillus subtilis (strain 168) OX=224308 GN=spmA PE=1 SV=1	spore maturation protein [Bacillus altitudinis] OJT57924.1 spore maturation protein [Bacillus altitudinis]
gene1236	0.0125669	0.0251339	0	0	-Inf	1	1	gi|111111112|ref|scaffold2.1|	239370	240527	-	1157	gene1236	GO:0071704;GO:0008152;GO:0043170;GO:0006508;GO:0044238;GO:0019538;GO:0008238;GO:0008233;GO:0004180;GO:0016787;GO:0003824;GO:0070011;GO:0009002;GO:0008236;GO:0004185;GO:0070008;GO:0017171	K07258	ENOG4105DZ1	M	sp|P35150|DACB_BACSU|D-alanyl-D-alanine carboxypeptidase DacB OS=Bacillus subtilis (strain 168) OX=224308 GN=dacB PE=1 SV=1	D-alanyl-D-alanine carboxypeptidase [Bacillus sp. RRD69]
gene1238	0.833607	1.66721	0	0	-Inf	1	1	gi|111111112|ref|scaffold2.1|	240635	241114	-	479	gene1238	-	-	ENOG4105GGU	S	sp|P35156|YPUI_BACSU|Uncharacterized protein YpuI OS=Bacillus subtilis (strain 168) OX=224308 GN=ypuI PE=4 SV=1	hypothetical protein [Bacillus pumilus] CVM13922.1 Uncharacterised protein [Streptococcus pneumoniae]
gene1239	0.134047	0.268095	0	0	-Inf	1	1	gi|111111112|ref|scaffold2.1|	241228	241734	-	506	gene1239	GO:0022402;GO:0051304;GO:0007049;GO:0009987;GO:0044763;GO:0007059;GO:0044699;GO:0051301;GO:0008152;GO:0090304;GO:0044249;GO:0034641;GO:0006807;GO:0034645;GO:0006139;GO:0044260;GO:1901360;GO:0071704;GO:0006260;GO:1901576;GO:0006725;GO:0009058;GO:0009059;GO:0046483;GO:0044238;GO:0044237;GO:0043170;GO:0006259;GO:0005737;GO:0044424;GO:0044464;GO:0005623;GO:0005622	K06024	ENOG4105K8I	K	sp|A8FEQ7|SCPB_BACP2|Segregation and condensation protein B OS=Bacillus pumilus (strain SAFR-032) OX=315750 GN=scpB PE=3 SV=1	SMC-Scp complex subunit ScpB [Bacillus xiamenensis] EKF34840.1 segregation and condensation protein B [Bacillus xiamenensis] AOZ90189.1 SMC-Scp complex subunit ScpB [Bacillus xiamenensis]
gene124	1.22318	2.44636	0	0	-Inf	1	1	gi|111111111|ref|scaffold1.1|	117174	118022	-	848	gene124	-	K17763	ENOG4106SCS	T	sp|O31856|RSBRC_BACSU|RsbT co-antagonist protein RsbRC OS=Bacillus subtilis (strain 168) OX=224308 GN=rsbRC PE=1 SV=1	piezosome protein [Bacillus stratosphericus LAMA 585] CVM94593.1 Stressosome protein rsbRC [Streptococcus pneumoniae]
gene1240	0.28904	0.578079	0	0	-Inf	1	1	gi|111111112|ref|scaffold2.1|	241811	242569	-	758	gene1240	GO:0007049;GO:0051301;GO:0009987;GO:0044763;GO:0007059;GO:0044699;GO:0008152;GO:0090304;GO:0044249;GO:0034641;GO:0006807;GO:0034645;GO:0006139;GO:0044260;GO:1901360;GO:0071704;GO:0006260;GO:1901576;GO:0006725;GO:0009058;GO:0009059;GO:0046483;GO:0044238;GO:0044237;GO:0043170;GO:0006259;GO:0005737;GO:0044424;GO:0044464;GO:0005623;GO:0005622	K05896	ENOG4108KVX	S	sp|A8FEQ8|SCPA_BACP2|Segregation and condensation protein A OS=Bacillus pumilus (strain SAFR-032) OX=315750 GN=scpA PE=3 SV=1	segregation/condensation protein A [Bacillus sp. M 2-6] EIL85019.1 segregation and condensation protein A [Bacillus sp. M 2-6]
gene1242	0.0628347	0.125669	0	0	-Inf	1	1	gi|111111112|ref|scaffold2.1|	242992	243159	+	167	gene1242	-	-	-	-	-	-
gene1243	0.0418898	0.0837796	0	0	-Inf	1	1	gi|111111112|ref|scaffold2.1|	243276	243485	+	209	gene1243	-	K09763	ENOG41090X1	S	sp|P17617|YPUF_BACSU|Uncharacterized protein YpuF OS=Bacillus subtilis (strain 168) OX=224308 GN=ypuF PE=4 SV=1	hypothetical protein [Bacillus sp. M 2-6] EIL85018.1 hypothetical protein BAME_16970 [Bacillus sp. M 2-6]
gene1244	3.33443	6.66886	0	0	-Inf	1	1	gi|111111112|ref|scaffold2.1|	243510	243863	-	353	gene1244	GO:0008152;GO:0016740;GO:0003824;GO:0016746;GO:0008080;GO:0016407;GO:0016747;GO:0016410	K02859	ENOG41090IN	S	sp|P17622|RIBT_BACSU|Protein RibT OS=Bacillus subtilis (strain 168) OX=224308 GN=ribT PE=1 SV=1	N-acetyltransferase [Bacillus pumilus] KML13042.1 reductase [Bacillus pumilus] KML50182.1 reductase [Bacillus pumilus] KMN78656.1 reductase [Bacillus pumilus]
gene1245	2.35421	4.70841	0	0	-Inf	1	1	gi|111111112|ref|scaffold2.1|	243977	244441	-	464	gene1245	GO:0008152;GO:0006771;GO:0009231;GO:0044249;GO:0034641;GO:0006807;GO:0044281;GO:0044283;GO:1901362;GO:1901360;GO:1901576;GO:0044710;GO:0044711;GO:0042727;GO:0042726;GO:0071704;GO:0018130;GO:0006767;GO:0006766;GO:0009987;GO:0009058;GO:0009110;GO:1901564;GO:0046483;GO:0044271;GO:1901566;GO:0042364;GO:0044237;GO:0003824;GO:0016740;GO:0000906;GO:0016853;GO:0016867;GO:0016866;GO:0016874;GO:0043234;GO:…	K00794	ENOG4108UTT	H	sp|A8FER2|RISB_BACP2|6,7-dimethyl-8-ribityllumazine synthase OS=Bacillus pumilus (strain SAFR-032) OX=315750 GN=ribH PE=3 SV=1	6,7-dimethyl-8-ribityllumazine synthase [Bacillus pumilus] KIL28352.1 6,7-dimethyl-8-ribityllumazine synthase [Bacillus pumilus]
gene1246	2.29556	4.59112	0	0	-Inf	1	1	gi|111111112|ref|scaffold2.1|	244468	245091	-	623	gene1246	GO:0008152;GO:0006771;GO:0009231;GO:0044249;GO:0034641;GO:0006807;GO:0044281;GO:0044283;GO:1901362;GO:1901360;GO:1901576;GO:0044710;GO:0044711;GO:0042727;GO:0042726;GO:0071704;GO:0018130;GO:0006767;GO:0006766;GO:0009987;GO:0009058;GO:0009110;GO:1901564;GO:0046483;GO:0044271;GO:1901566;GO:0042364;GO:0044237;GO:0046872;GO:0003824;GO:0008686;GO:0016829;GO:0016830;GO:0043167;GO:0043169;GO:0005488;GO:…	K14652	ENOG4105C66	H	sp|P17620|RIBBA_BACSU|Riboflavin biosynthesis protein RibBA OS=Bacillus subtilis (strain 168) OX=224308 GN=ribBA PE=3 SV=1	3,4-dihydroxy-2-butanone-4-phosphate synthase [Bacillus pumilus]
gene1247	0.686993	1.37399	0	0	-Inf	1	1	gi|111111112|ref|scaffold2.1|	245103	245816	-	713	gene1247	GO:0008152;GO:0044249;GO:0044710;GO:0009987;GO:0009058;GO:0044237;GO:0006771;GO:0009231;GO:0034641;GO:0006807;GO:0044281;GO:0044283;GO:1901362;GO:1901360;GO:1901576;GO:0044711;GO:0042727;GO:0042726;GO:0071704;GO:0018130;GO:0006767;GO:0006766;GO:0009110;GO:1901564;GO:0046483;GO:0044271;GO:1901566;GO:0042364;GO:0055114;GO:0003824;GO:0016765;GO:0016740;GO:0004746;GO:0016491	K00793	ENOG4108R6K	H	sp|P16440|RISA_BACSU|Riboflavin synthase OS=Bacillus subtilis (strain 168) OX=224308 GN=ribE PE=1 SV=2	riboflavin synthase subunit alpha [Bacillus sp. M 2-6] KIL28350.1 Riboflavin synthase eubacterial/eukaryotic [Bacillus pumilus] APP16647.1 riboflavin synthase subunit alpha [Bacillus pumilus]
gene1248	0.314174	0.628347	0	0	-Inf	1	1	gi|111111112|ref|scaffold2.1|	246261	246623	-	362	gene1248	-	-	-	-	sp|P17616|YPUD_BACSU|Uncharacterized protein YpuD OS=Bacillus subtilis (strain 168) OX=224308 GN=ypuD PE=4 SV=1	protein ypud orfx4 [Bacillus stratosphericus LAMA 585]
gene125	0.0251339	0.0502678	0	0	-Inf	1	1	gi|111111111|ref|scaffold1.1|	118166	118594	-	428	gene125	GO:0008152;GO:0090305;GO:0030154;GO:0043934;GO:0090304;GO:0034641;GO:0006807;GO:0009653;GO:0044699;GO:0006139;GO:0048869;GO:0071704;GO:1901360;GO:0048646;GO:0032502;GO:0009987;GO:0006725;GO:0044767;GO:0030435;GO:0044763;GO:0046483;GO:0044238;GO:0048856;GO:0044237;GO:0043170;GO:0003824;GO:0016787;GO:0004518;GO:0016788;GO:0005576	-	ENOG4105WFK	S	sp|P42983|NUCB_BACSU|Sporulation-specific extracellular nuclease OS=Bacillus subtilis (strain 168) OX=224308 GN=nucB PE=2 SV=1	sporulation protein [Bacillus altitudinis] AKC68116.1 sporulation protein [Bacillus pumilus] KLV22483.1 sporulation protein [Bacillus altitudinis] KML18488.1 sporulation protein [Bacillus stratosphericus] KML62013.1 sporulation protein [Bacillus stratosphericus] KMN31318.1 sporulation protein [Bacillus stratosphericus] KMN69297.1 sporulation protein [Bacillus sp. LK10] AKU32456.1 sporulation prot…
gene1250	0.0251339	0.0502678	0	0	-Inf	1	1	gi|111111112|ref|scaffold2.1|	247277	247858	-	581	gene1250	GO:0019222;GO:0031326;GO:0031323;GO:0050789;GO:0080090;GO:2000112;GO:0060255;GO:0065007;GO:0010468;GO:0019219;GO:0009889;GO:0050794;GO:0051171;GO:2001141;GO:0051252;GO:0006355;GO:0010556;GO:0032774;GO:0090304;GO:0044249;GO:0034641;GO:0006807;GO:0034645;GO:1901362;GO:1901360;GO:0006139;GO:0044260;GO:0071704;GO:0010467;GO:0018130;GO:1901576;GO:0006725;GO:0009987;GO:0009058;GO:0009059;GO:0008152;GO:…	K16137	ENOG4108IND	K	sp|Q7WY76|YEZE_BACSU|Uncharacterized HTH-type transcriptional regulator YezE OS=Bacillus subtilis (strain 168) OX=224308 GN=yezE PE=4 SV=1	transcriptional [Bacillus stratosphericus LAMA 585]
gene1251	0.234583	0.469166	0	0	-Inf	1	1	gi|111111112|ref|scaffold2.1|	248098	249360	+	1262	gene1251	GO:0006810;GO:0009987;GO:0055085;GO:0044765;GO:0044763;GO:0051234;GO:0051179;GO:0044699;GO:0016020;GO:0016021;GO:0044425;GO:0031224	-	ENOG4105EQ0	G	sp|P76628|YGAY_ECOLI|Putative uncharacterized transporter YgaY OS=Escherichia coli (strain K12) OX=83333 GN=ygaY PE=5 SV=2	MFS transporter [Bacillus pumilus] AMB90231.1 transporter [Bacillus pumilus]
gene1252	0.0125669	0.0251339	0	0	-Inf	1	1	gi|111111112|ref|scaffold2.1|	249391	249828	-	437	gene1252	GO:0000413;GO:0044238;GO:0006457;GO:0018208;GO:0044260;GO:0044267;GO:0019538;GO:0044237;GO:0009987;GO:0018193;GO:0043170;GO:0071704;GO:0043412;GO:0036211;GO:0006464;GO:0008152;GO:0003824;GO:0016853;GO:0003755;GO:0016859	K03768	ENOG4108ZCU	O	sp|P35137|PPIB_BACSU|Peptidyl-prolyl cis-trans isomerase B OS=Bacillus subtilis (strain 168) OX=224308 GN=ppiB PE=1 SV=1	peptidylprolyl isomerase [Bacillus pumilus] AOC56293.1 peptidylprolyl isomerase [Bacillus pumilus]
gene1253	13.9158	27.8316	0	0	-Inf	1	1	gi|111111112|ref|scaffold2.1|	250102	251034	+	932	gene1253	-	-	ENOG4105PTM	S	sp|P31847|YPUA_BACSU|Uncharacterized protein YpuA OS=Bacillus subtilis (strain 168) OX=224308 GN=ypuA PE=2 SV=2	exported protein [Bacillus stratosphericus LAMA 585]
gene1254	3.04539	6.09078	0	0	-Inf	1	1	gi|111111112|ref|scaffold2.1|	251075	252406	-	1331	gene1254	GO:0008152;GO:0044249;GO:0006807;GO:1901576;GO:0071704;GO:0009987;GO:0009058;GO:1901564;GO:1901566;GO:0044237;GO:0044710;GO:0044238;GO:0019752;GO:0016053;GO:0009067;GO:0009066;GO:0044283;GO:0044711;GO:0006520;GO:1901605;GO:1901607;GO:0043648;GO:0043436;GO:0008652;GO:0006082;GO:0046394;GO:0006553;GO:0009089;GO:0046451;GO:0009085;GO:0044281;GO:0006596;GO:0034641;GO:0009308;GO:0044106;GO:0044271;GO:…	K01586	ENOG4105CU5	E	sp|P23630|DCDA_BACSU|Diaminopimelate decarboxylase OS=Bacillus subtilis (strain 168) OX=224308 GN=lysA PE=3 SV=5	diaminopimelate decarboxylase [Bacillus stratosphericus LAMA 585]
gene1255	0.263906	0.527811	0	0	-Inf	1	1	gi|111111112|ref|scaffold2.1|	252516	253916	-	1400	gene1255	GO:0009847;GO:0032502;GO:0016020;GO:0016021;GO:0044425;GO:0031224	K06408	ENOG4105E1K	S	sp|P31845|SP5AF_BACSU|Stage V sporulation protein AF OS=Bacillus subtilis (strain 168) OX=224308 GN=spoVAF PE=3 SV=4	spore germination protein [Bacillus altitudinis] KLV23197.1 stage V sporulation protein AF [Bacillus altitudinis]
gene1258	0.0167559	0.0335118	0	0	-Inf	1	1	gi|111111112|ref|scaffold2.1|	254907	255794	-	887	gene1258	GO:0008152;GO:0003824	K06406	ENOG4105CZ3	S	sp|P40869|SP5AD_BACSU|Stage V sporulation protein AD OS=Bacillus subtilis (strain 168) OX=224308 GN=spoVAD PE=1 SV=1	stage v sporulation protein ad [Bacillus stratosphericus LAMA 585]
gene1259	0.00418898	0.00837796	0	0	-Inf	1	1	gi|111111112|ref|scaffold2.1|	255936	256406	-	470	gene1259	-	K06405	ENOG41090VF	S	sp|P40868|SP5AC_BACSU|Stage V sporulation protein AC OS=Bacillus subtilis (strain 168) OX=224308 GN=spoVAC PE=4 SV=1	stage v sporulation protein ac [Bacillus stratosphericus LAMA 585]
gene1261	0.0125669	0.0251339	0	0	-Inf	1	1	gi|111111112|ref|scaffold2.1|	256815	257435	-	620	gene1261	-	K06403	ENOG4108XSX	S	sp|P40866|SP5AA_BACSU|Stage V sporulation protein AA OS=Bacillus subtilis (strain 168) OX=224308 GN=spoVAA PE=4 SV=2	stage V sporulation protein AA [Bacillus stratosphericus] CVM14258.1 Stage V sporulation protein AA [Streptococcus pneumoniae] OQP20480.1 stage V sporulation protein AA [Bacillus stratosphericus]
gene1262	2.07355	4.14709	0	0	-Inf	1	1	gi|111111112|ref|scaffold2.1|	257550	258317	-	767	gene1262	GO:0032774;GO:0019222;GO:0031326;GO:0031323;GO:0090304;GO:0044249;GO:0034641;GO:0006807;GO:0034645;GO:1901362;GO:0050789;GO:1901360;GO:0080090;GO:0006139;GO:0044260;GO:0071704;GO:2000112;GO:0060255;GO:0010467;GO:0065007;GO:0010468;GO:0018130;GO:1901576;GO:0019219;GO:0006725;GO:0009987;GO:0009889;GO:0050794;GO:0009058;GO:0009059;GO:0051171;GO:0008152;GO:2001141;GO:0034654;GO:0046483;GO:0016070;GO:…	K03091	ENOG4105CT2	K	sp|P07860|RPSF_BACSU|RNA polymerase sigma-F factor OS=Bacillus subtilis (strain 168) OX=224308 GN=sigF PE=1 SV=1	RNA polymerase sporulation sigma factor SigF [Bacillus pumilus]
gene1263	0.12148	0.242961	0	0	-Inf	1	1	gi|111111112|ref|scaffold2.1|	258330	258770	-	440	gene1263	GO:0008152;GO:0016310;GO:0009987;GO:0044237;GO:0006796;GO:0006793;GO:0044267;GO:0044260;GO:0071704;GO:0006468;GO:0006464;GO:0043412;GO:0036211;GO:0044238;GO:0019538;GO:0043170;GO:0051252;GO:0009892;GO:0051172;GO:0019222;GO:0031327;GO:0031323;GO:0010629;GO:0050789;GO:0080090;GO:0010605;GO:0009890;GO:2000112;GO:2000113;GO:0060255;GO:0065007;GO:0031326;GO:0048519;GO:0010468;GO:0031324;GO:0045934;GO:…	K06379	ENOG4108ZBE	T	sp|A8FET0|SP2AB_BACP2|Anti-sigma F factor OS=Bacillus pumilus (strain SAFR-032) OX=315750 GN=spoIIAB PE=3 SV=1	anti-sigma F factor [Bacillus xiamenensis] EKF33870.1 anti-sigma F factor [Bacillus xiamenensis] AOZ90165.1 anti-sigma F factor [Bacillus xiamenensis]
gene1264	0.129858	0.259717	0	0	-Inf	1	1	gi|111111112|ref|scaffold2.1|	258767	259120	-	353	gene1264	GO:0051252;GO:0080090;GO:0019222;GO:0031326;GO:0031323;GO:0050789;GO:2000112;GO:0060255;GO:0065007;GO:0010468;GO:0019219;GO:0009889;GO:0050794;GO:0051171;GO:2001141;GO:0006355;GO:0010556;GO:0030154;GO:0043934;GO:0009653;GO:0044699;GO:0048869;GO:0048646;GO:0032502;GO:0009987;GO:0044767;GO:0030435;GO:0044763;GO:0048856	K06378	ENOG41082AN	T	sp|P26777|SP2AA_BACLI|Anti-sigma F factor antagonist OS=Bacillus licheniformis OX=1402 GN=spoIIAA PE=3 SV=1	hypothetical protein B4134_2256 [Bacillus pumilus]
gene1265	0.297418	0.594835	0	0	-Inf	1	1	gi|111111112|ref|scaffold2.1|	259278	260432	-	1154	gene1265	GO:0071704;GO:0008152;GO:0043170;GO:0006508;GO:0044238;GO:0019538;GO:0008238;GO:0008233;GO:0004180;GO:0016787;GO:0003824;GO:0070011;GO:0009002;GO:0008236;GO:0004185;GO:0070008;GO:0017171	K07258	ENOG4105DZ1	M	sp|P38422|DACF_BACSU|D-alanyl-D-alanine carboxypeptidase DacF OS=Bacillus subtilis (strain 168) OX=224308 GN=dacF PE=2 SV=2	D-alanyl-D-alanine carboxypeptidase [Bacillus pumilus] KIL26877.1 D-alanyl-D-alanine carboxypeptidase [Bacillus pumilus]
gene1269	0.900631	1.80126	0	0	-Inf	1	1	gi|111111112|ref|scaffold2.1|	262754	263611	-	857	gene1269	GO:0015074;GO:0006310;GO:0090304;GO:0034641;GO:0006807;GO:0006139;GO:0044260;GO:1901360;GO:0071704;GO:0009987;GO:0006725;GO:0008152;GO:0046483;GO:0044238;GO:0044237;GO:0043170;GO:0006259;GO:0044699;GO:0044763;GO:0051301;GO:0007059;GO:0007049;GO:0032196;GO:0006313;GO:0097159;GO:0005488;GO:0003676;GO:0003677;GO:1901363;GO:0003824;GO:0008907;GO:0009009;GO:0009037;GO:0044464;GO:0005623;GO:0005622;GO:…	K04763	ENOG4105C13	L	sp|P46352|XERD_BACSU|Tyrosine recombinase XerD OS=Bacillus subtilis (strain 168) OX=224308 GN=xerD PE=3 SV=3	site-specific tyrosine recombinase XerD [Bacillus pumilus]
gene127	0.322551	0.645103	0	0	-Inf	1	1	gi|111111111|ref|scaffold1.1|	118774	120747	-	1973	gene127	GO:0008152;GO:0016740;GO:0003824;GO:0016757	-	ENOG4105EDW	M	sp|P37483|YYCA_BACSU|Putative mannosyltransferase YycA OS=Bacillus subtilis (strain 168) OX=224308 GN=yycA PE=3 SV=2	mannosyltransferase [Bacillus altitudinis] OPW92263.1 mannosyltransferase [Bacillus altitudinis]
gene1270	0.00418898	0.00837796	0	0	-Inf	1	1	gi|111111112|ref|scaffold2.1|	263651	263887	-	236	gene1270	-	-	ENOG4106DQJ	S	sp|C0H451|YQZK_BACSU|Uncharacterized membrane protein YqzK OS=Bacillus subtilis (strain 168) OX=224308 GN=yqzK PE=4 SV=1	membrane protein [Bacillus xiamenensis] EKF33876.1 hypothetical protein BA1_17800 [Bacillus xiamenensis] AOZ90738.1 hypothetical protein BK049_16500 [Bacillus xiamenensis]
gene1271	0.666048	1.3321	0	0	-Inf	1	1	gi|111111112|ref|scaffold2.1|	263996	264448	-	452	gene1271	GO:0019222;GO:0031326;GO:0031323;GO:0050789;GO:0080090;GO:2000112;GO:0060255;GO:0065007;GO:0010468;GO:0019219;GO:0009889;GO:0050794;GO:0051171;GO:2001141;GO:0051252;GO:0006355;GO:0010556;GO:0003700;GO:0001071;GO:0005488;GO:0097159;GO:0003676;GO:0003677;GO:1901363	K03711	ENOG41090R7	P	sp|P54574|FUR_BACSU|Ferric uptake regulation protein OS=Bacillus subtilis (strain 168) OX=224308 GN=fur PE=1 SV=2	transcriptional repressor [Bacillus pumilus] KDE52878.1 Fur family transcriptional regulator [Bacillus pumilus] KEO49980.1 Fur family transcriptional regulator [Bacillus pumilus]
gene1273	0.561323	1.12265	0	0	-Inf	1	1	gi|111111112|ref|scaffold2.1|	265330	266481	-	1151	gene1273	GO:0008152;GO:0044238;GO:0019538;GO:0043170;GO:0071704;GO:0006508;GO:0019222;GO:0050790;GO:0050789;GO:0065007;GO:0044092;GO:0065009;GO:0043086;GO:0016787;GO:0017171;GO:0003824;GO:0070011;GO:0008233;GO:0008236;GO:0004175;GO:0004252	K01342	ENOG4106V08	O	sp|P35835|SUBN_BACNA|Subtilisin NAT OS=Bacillus subtilis subsp. natto OX=86029 GN=aprN PE=1 SV=1	serine alkaline protease (subtilisin e) [Bacillus stratosphericus LAMA 585] ANQ68334.1 keratinase Ker2 [Bacillus pumilus]
gene1275	0.950898	1.9018	0	0	-Inf	1	1	gi|111111112|ref|scaffold2.1|	267061	267444	-	383	gene1275	GO:0008152;GO:0016740;GO:0003824;GO:0016407;GO:0016746;GO:0016747;GO:0008080;GO:0016410	K02348	ENOG4105KRJ	S	sp|P0AEH4|ELAA_SHIFL|Protein ElaA OS=Shigella flexneri OX=623 GN=elaA PE=3 SV=1	acyltransferase [Streptococcus pneumoniae]
gene1276	7.91298	15.826	0	0	-Inf	1	1	gi|111111112|ref|scaffold2.1|	267500	268681	-	1181	gene1276	GO:0008152;GO:1901360;GO:0046483;GO:0006807;GO:0044260;GO:0034641;GO:0006139;GO:0009987;GO:0006725;GO:0043170;GO:0090304;GO:0044237;GO:0071704;GO:0044238;GO:0006259;GO:0046434;GO:0009166;GO:0009167;GO:0009164;GO:0044281;GO:0009161;GO:0046130;GO:0009169;GO:0009199;GO:0009207;GO:0032392;GO:0009205;GO:0009203;GO:0046034;GO:0046128;GO:0042454;GO:1901564;GO:1901565;GO:0009128;GO:0006163;GO:0019637;GO:…	-	ENOG4107S5P	L	sp|P38423|YQXK_BACSU|Uncharacterized protein YqxK OS=Bacillus subtilis (strain 168) OX=224308 GN=yqxK PE=4 SV=3	TIGR00375 family protein [Bacillus sp. Leaf49] KQU10392.1 hypothetical protein ASG46_11755 [Bacillus sp. Leaf49]
gene1277	0.175937	0.351874	0	0	-Inf	1	1	gi|111111112|ref|scaffold2.1|	268678	268797	-	119	gene1277	GO:0008152;GO:0016787;GO:0003824;GO:0016818;GO:0016817;GO:0047631;GO:0016462	K01515	ENOG4108YZ4	F	sp|P54570|ADPP_BACSU|ADP-ribose pyrophosphatase OS=Bacillus subtilis (strain 168) OX=224308 GN=nudF PE=1 SV=1	ADP-ribose pyrophosphatase [Bacillus sp. Leaf49] AMB90255.1 ADP-ribose pyrophosphatase [Bacillus pumilus]
gene1278	2.64744	5.29487	0	0	-Inf	1	1	gi|111111112|ref|scaffold2.1|	269464	270330	+	866	gene1278	GO:0044710;GO:0055114;GO:0008152;GO:0003824;GO:0016491	-	ENOG4107B4W	C	sp|P54569|YQKF_BACSU|Uncharacterized oxidoreductase YqkF OS=Bacillus subtilis (strain 168) OX=224308 GN=yqkF PE=3 SV=1	aldo/keto reductase [Bacillus pumilus] ALM28783.1 oxidoreductase [Bacillus pumilus] ALM45322.1 oxidoreductase [Bacillus pumilus] ANY96801.1 oxidoreductase [Bacillus pumilus]
gene1279	0.0712127	0.142425	0	0	-Inf	1	1	gi|111111112|ref|scaffold2.1|	270509	270658	-	149	gene1279	-	-	-	-	sp|P54568|YQKE_BACSU|Uncharacterized protein YqkE OS=Bacillus subtilis (strain 168) OX=224308 GN=yqkE PE=4 SV=1	hypothetical protein [Bacillus pumilus] EDW20925.1 conserved domain protein [Bacillus pumilus ATCC 7061] KMY22020.1 hypothetical protein TW93_04145 [Bacillus pumilus]
gene128	0.733072	1.46614	0	0	-Inf	1	1	gi|111111111|ref|scaffold1.1|	120915	121823	-	908	gene128	GO:0044238;GO:0019538;GO:0043170;GO:0071704;GO:0008152;GO:0006508;GO:0016787;GO:0017171;GO:0003824;GO:0070011;GO:0008233;GO:0008236;GO:0004175;GO:0004252;GO:0008237;GO:0005509;GO:0043169;GO:0043167;GO:0005488;GO:0046872	K01318	ENOG4108TCS	O	sp|P80057|GSEP_BACLD|Glutamyl endopeptidase OS=Bacillus licheniformis (strain ATCC 14580 / DSM 13 / JCM 2505 / NBRC 12200 / NCIMB 9375 / NRRL NRS-1264 / Gibson 46) OX=279010 GN=blaSE PE=1 SV=2	peptidase [Bacillus stratosphericus]
gene1280	3.14174	6.28347	0	0	-Inf	1	1	gi|111111112|ref|scaffold2.1|	270814	271782	+	968	gene1280	GO:0008152;GO:0003824;GO:0016787	K06889	ENOG4105DRA	S	sp|P54567|YQKD_BACSU|Uncharacterized protein YqkD OS=Bacillus subtilis (strain 168) OX=224308 GN=yqkD PE=4 SV=1	serine peptidase [Bacillus sp. Leaf49]
gene1283	0.0335118	0.0670237	0	0	-Inf	1	1	gi|111111112|ref|scaffold2.1|	273622	273957	-	335	gene1283	-	-	ENOG4106HZJ	S	sp|P54565|YQKB_BACSU|Uncharacterized protein YqkB OS=Bacillus subtilis (strain 168) OX=224308 GN=yqkB PE=4 SV=1	hypothetical protein C883_2622 [Bacillus stratosphericus LAMA 585]
gene1284	0.305796	0.611591	0	0	-Inf	1	1	gi|111111112|ref|scaffold2.1|	274231	274869	+	638	gene1284	GO:0008152;GO:0071704;GO:0044238;GO:0005975;GO:0016787;GO:0016798;GO:0003824;GO:0004553;GO:0030246;GO:0005488	K20628	ENOG4108YQE	M	sp|O34918|YOAJ_BACSU|Expansin-YoaJ OS=Bacillus subtilis (strain 168) OX=224308 GN=yoaJ PE=1 SV=1	Expansin-YoaJ [Bacillus stratosphericus]
gene1285	0.389575	0.77915	0	0	-Inf	1	1	gi|111111112|ref|scaffold2.1|	274887	275861	-	974	gene1285	GO:0008152;GO:0003824;GO:0016740;GO:0016746;GO:0016747;GO:0016410;GO:0008080;GO:0016407	-	ENOG4105RHY	F	sp|P54564|YQKA_BACSU|UPF0157 protein YqkA OS=Bacillus subtilis (strain 168) OX=224308 GN=yqkA PE=3 SV=1	GNAT family N-acetyltransferase [Bacillus stratosphericus] KML00151.1 hypothetical protein VL05_15675 [Bacillus stratosphericus] KML54279.1 hypothetical protein VL17_11340 [Bacillus stratosphericus]
gene1286	0.0670237	0.134047	0	0	-Inf	1	1	gi|111111112|ref|scaffold2.1|	275858	276337	-	479	gene1286	GO:0008152;GO:0008080;GO:0016740;GO:0003824;GO:0016407;GO:0016746;GO:0016747;GO:0016410	-	ENOG4108XET	S	sp|P54562|YQJY_BACSU|Uncharacterized protein YqjY OS=Bacillus subtilis (strain 168) OX=224308 GN=yqjY PE=1 SV=1	GNAT family N-acetyltransferase [Bacillus stratosphericus] OQP22473.1 GNAT family N-acetyltransferase [Bacillus stratosphericus]
gene1287	2.8904	5.78079	0	0	-Inf	1	1	gi|111111112|ref|scaffold2.1|	276613	277068	+	455	gene1287	-	-	ENOG410796K	S	sp|O06475|YFMQ_BACSU|Uncharacterized protein YfmQ OS=Bacillus subtilis (strain 168) OX=224308 GN=yfmQ PE=4 SV=1	protein yfmq [Bacillus stratosphericus LAMA 585]
gene1288	0.464977	0.929954	0	0	-Inf	1	1	gi|111111112|ref|scaffold2.1|	277210	278442	+	1232	gene1288	GO:0090304;GO:0034641;GO:0006807;GO:0006139;GO:0044260;GO:1901360;GO:0071704;GO:0009987;GO:0006725;GO:0008152;GO:0046483;GO:0044238;GO:0044237;GO:0043170;GO:0006259;GO:0044699;GO:0051716;GO:0006281;GO:0006974;GO:0044763;GO:0050896;GO:0006950;GO:0033554;GO:0006260;GO:0044249;GO:0034645;GO:1901576;GO:0009058;GO:0009059;GO:0006261;GO:0034061;GO:0005488;GO:0003676;GO:0003677;GO:1901363;GO:0003887;GO:…	K03502	ENOG4105CQ3	L	sp|P54560|DPO42_BACSU|DNA polymerase IV 2 OS=Bacillus subtilis (strain 168) OX=224308 GN=dinB2 PE=3 SV=1	DNA-directed DNA polymerase [Streptococcus pneumoniae]
gene1289	0.100536	0.201071	0	0	-Inf	1	1	gi|111111112|ref|scaffold2.1|	278458	278802	+	344	gene1289	-	-	ENOG41069MY	S	sp|P54561|YQJX_BACSU|Uncharacterized protein YqjX OS=Bacillus subtilis (strain 168) OX=224308 GN=yqjX PE=4 SV=1	YolD-like family protein [Bacillus pumilus] AMM89480.1 hypothetical protein UP15_10995 [Bacillus pumilus]
gene129	3.34281	6.68561	0	0	-Inf	1	1	gi|111111111|ref|scaffold1.1|	122068	125211	-	3143	gene129	GO:0044710;GO:0008152;GO:0055114;GO:0009987;GO:0044237;GO:0019752;GO:0044249;GO:0006807;GO:0044281;GO:0071704;GO:0009058;GO:0043436;GO:0006082;GO:0006790;GO:0044283;GO:1901576;GO:0044711;GO:0006520;GO:1901605;GO:1901607;GO:0044238;GO:0008652;GO:1901564;GO:1901566;GO:0046394;GO:0016053;GO:0000103;GO:0009069;GO:0000096;GO:0000097;GO:0009070;GO:0044272;GO:0006534;GO:0019344;GO:0006091;GO:0022900;GO:…	K14338	ENOG4107EER	P	sp|O08336|CYPB_BACSU|Bifunctional cytochrome P450/NADPH--P450 reductase 2 OS=Bacillus subtilis (strain 168) OX=224308 GN=cypB PE=1 SV=1	NADPH--cytochrome P450 reductase [Bacillus pumilus]
gene1290	2.55528	5.11056	0	0	-Inf	1	1	gi|111111112|ref|scaffold2.1|	279034	280269	+	1235	gene1290	GO:0006810;GO:0009987;GO:0055085;GO:0044765;GO:0044763;GO:0051234;GO:0051179;GO:0044699;GO:0005215;GO:0016021;GO:0016020;GO:0044425;GO:0031224;GO:0044464;GO:0005623;GO:0071944;GO:0005886	-	ENOG4105D88	G	sp|P54559|YQJV_BACSU|Uncharacterized MFS-type transporter YqjV OS=Bacillus subtilis (strain 168) OX=224308 GN=yqjV PE=3 SV=2	mfs superfamily [Bacillus stratosphericus LAMA 585]
gene1291	0.624158	1.24832	0	0	-Inf	1	1	gi|111111112|ref|scaffold2.1|	280499	281380	-	881	gene1291	GO:0009987;GO:0008152;GO:0006796;GO:0006793;GO:0044237;GO:0016310;GO:0071704;GO:0044238;GO:0046129;GO:0015936;GO:0015937;GO:0006732;GO:0044249;GO:0034641;GO:0009165;GO:0009108;GO:0009163;GO:0072521;GO:0072522;GO:1901362;GO:0009259;GO:1901360;GO:0006139;GO:0044710;GO:0051186;GO:0090407;GO:0042278;GO:0033875;GO:0051188;GO:0042455;GO:0046483;GO:0018130;GO:0046390;GO:1901576;GO:0006725;GO:0009152;GO:…	K00867	ENOG4105CS9	H	sp|P54556|COAA_BACSU|Pantothenate kinase OS=Bacillus subtilis (strain 168) OX=224308 GN=coaA PE=3 SV=2	type I pantothenate kinase [Bacillus stratosphericus]
gene1292	9.27021	18.5404	0	0	-Inf	1	1	gi|111111112|ref|scaffold2.1|	281648	282976	+	1328	gene1292	GO:0044710;GO:0055114;GO:0008152;GO:0019725;GO:0009987;GO:0050794;GO:0042592;GO:0044763;GO:0065007;GO:0045454;GO:0065008;GO:0050789;GO:0044699;GO:0016491;GO:1901363;GO:0005488;GO:1901265;GO:0043168;GO:0050662;GO:0050660;GO:0043167;GO:0000166;GO:0036094;GO:0003824;GO:0048037;GO:0097159;GO:0016651;GO:0003954;GO:0050451;GO:0016667;GO:0016668;GO:0005737;GO:0044424;GO:0044464;GO:0005623;GO:0005622	-	ENOG4107QMW	P	sp|Q5JGP4|CDR_THEKO|Coenzyme A disulfide reductase OS=Thermococcus kodakarensis (strain ATCC BAA-918 / JCM 12380 / KOD1) OX=69014 GN=TK1299 PE=3 SV=1	CoA-disulfide reductase [Bacillus pumilus] ALM28768.1 NADH dehydrogenase [Bacillus pumilus] ALM45307.1 NADH dehydrogenase [Bacillus pumilus] ANY96786.1 NADH dehydrogenase [Bacillus pumilus]
gene1293	9.8064	19.6128	0	0	-Inf	1	1	gi|111111112|ref|scaffold2.1|	283078	283407	+	329	gene1293	-	-	-	-	-	glyoxalase bleomycin resistance protein dioxygenase [Bacillus stratosphericus LAMA 585]
gene1294	3.72819	7.45638	0	0	-Inf	1	1	gi|111111112|ref|scaffold2.1|	283423	284199	-	776	gene1294	GO:0055114;GO:0044710;GO:0008152;GO:0003824;GO:0016491	K07124	ENOG4108JCZ	S	sp|P54554|YQJQ_BACSU|Uncharacterized oxidoreductase YqjQ OS=Bacillus subtilis (strain 168) OX=224308 GN=yqjQ PE=3 SV=1	NAD(P)-dependent oxidoreductase [Bacillus sp. L_1B0_12] KKK09617.1 oxidoreductase [Bacillus sp. L_1B0_12]
gene1295	0.481733	0.963465	0	0	-Inf	1	1	gi|111111112|ref|scaffold2.1|	284200	285150	-	950	gene1295	GO:0008152;GO:0016787;GO:0003824	-	ENOG4105C14	S	sp|P54553|YQJP_BACSU|Probable metallo-hydrolase YqjP OS=Bacillus subtilis (strain 168) OX=224308 GN=yqjP PE=3 SV=1	MBL fold metallo-hydrolase [Bacillus stratosphericus] OQP22464.1 MBL fold metallo-hydrolase [Bacillus stratosphericus]
gene1296	0.314174	0.628347	0	0	-Inf	1	1	gi|111111112|ref|scaffold2.1|	285585	286412	+	827	gene1296	GO:0044710;GO:0008152;GO:0006561;GO:0055114;GO:0044283;GO:0019752;GO:0044249;GO:0006807;GO:0044281;GO:0009064;GO:1901362;GO:1901360;GO:1901576;GO:0044711;GO:0006560;GO:0006520;GO:0071704;GO:1901605;GO:1901607;GO:0018130;GO:0044238;GO:0009987;GO:0009058;GO:0043436;GO:0046483;GO:0008652;GO:1901564;GO:1901566;GO:0006082;GO:0046394;GO:0016053;GO:0044237;GO:0009084;GO:0055129;GO:0004735;GO:0016491;GO:…	K00286	ENOG4105II7	E	sp|P54552|P5CR2_BACSU|Pyrroline-5-carboxylate reductase 2 OS=Bacillus subtilis (strain 168) OX=224308 GN=proI PE=3 SV=1	pyrroline-5-carboxylate reductase [Bacillus stratosphericus] KML00162.1 pyrroline-5-carboxylate reductase [Bacillus stratosphericus] KML54290.1 pyrroline-5-carboxylate reductase [Bacillus stratosphericus]
gene1297	0.0251339	0.0502678	0	0	-Inf	1	1	gi|111111112|ref|scaffold2.1|	286448	286906	-	458	gene1297	-	-	ENOG4108ZEV	S	sp|Q8ET50|Y413_OCEIH|Putative metal-dependent hydrolase OB0413 OS=Oceanobacillus iheyensis (strain DSM 14371 / CIP 107618 / JCM 11309 / KCTC 3954/ HTE831) OX=221109 GN=OB0413 PE=3 SV=1	DinB family protein [Bacillus altitudinis] KDE30891.1 hypothetical protein BA79_11463 [Bacillus altitudinis 41KF2b]
gene1298	13.3754	26.7508	0	0	-Inf	1	1	gi|111111112|ref|scaffold2.1|	287054	288667	-	1613	gene1298	GO:0008152;GO:0044238;GO:0019538;GO:0043170;GO:0071704;GO:0006508;GO:0003824;GO:0016787;GO:0008233;GO:0070011;GO:0008237	-	ENOG4105F6C	E	sp|P54551|YQJN_BACSU|Uncharacterized protein YqjN OS=Bacillus subtilis (strain 168) OX=224308 GN=yqjN PE=4 SV=2	hypothetical protein [Bacillus altitudinis] OPW99270.1 hypothetical protein BG911_09875 [Bacillus altitudinis]
gene1299	7.71191	15.4238	0	0	-Inf	1	1	gi|111111112|ref|scaffold2.1|	288886	289824	+	938	gene1299	GO:0008152;GO:0044710;GO:0055114;GO:0016491;GO:0003824;GO:0005488;GO:0050662;GO:0048037;GO:0043167;GO:1901363;GO:1901265;GO:0043168;GO:0000166;GO:0010181;GO:0036094;GO:0097159;GO:0032553;GO:0050660;GO:0016627;GO:0016628;GO:0008670	K00354	ENOG4105CCY	C	sp|A8FEW4|NAMA_BACP2|NADPH dehydrogenase OS=Bacillus pumilus (strain SAFR-032) OX=315750 GN=namA PE=3 SV=1	NADPH dehydrogenase NamA [Bacillus pumilus] AHL71977.1 NADPH dehydrogenase [Bacillus pumilus]
gene13	0.4943	0.988599	0	0	-Inf	1	1	gi|111111111|ref|scaffold1.1|	14404	15813	-	1409	gene13	GO:0008152;GO:0044710;GO:0055114;GO:0003824;GO:0016491;GO:0016614;GO:0005488;GO:0043167;GO:1901363;GO:1901265;GO:0043168;GO:0050662;GO:0050660;GO:0000166;GO:0036094;GO:0048037;GO:0097159;GO:0008762;GO:0016616;GO:0004457;GO:0016898;GO:0004458;GO:0051540;GO:0051536;GO:0016899;GO:0003973;GO:0052852;GO:0052854;GO:0052853	K00104	ENOG4105CQB	C	sp|P94535|GLCD_BACSU|Glycolate oxidase subunit GlcD OS=Bacillus subtilis (strain 168) OX=224308 GN=glcD PE=3 SV=1	glycolate oxidase subunit GlcD [Bacillus sp. L_1B0_12] KKK08379.1 FAD-binding protein [Bacillus sp. L_1B0_12]
gene130	0.0125669	0.0251339	0	0	-Inf	1	1	gi|111111111|ref|scaffold1.1|	125233	125814	-	581	gene130	GO:0032774;GO:0019222;GO:0031326;GO:0031323;GO:0090304;GO:0044249;GO:0034641;GO:0006807;GO:0034645;GO:1901362;GO:0050789;GO:1901360;GO:0080090;GO:0006139;GO:0044260;GO:0071704;GO:2000112;GO:0060255;GO:0010467;GO:0065007;GO:0010468;GO:0018130;GO:1901576;GO:0019219;GO:0006725;GO:0009987;GO:0009889;GO:0050794;GO:0009058;GO:0009059;GO:0051171;GO:0008152;GO:2001141;GO:0034654;GO:0046483;GO:0016070;GO:…	K22106	ENOG4105Y7M	K	sp|O08335|FATR_BACSU|HTH-type transcriptional repressor FatR OS=Bacillus subtilis (strain 168) OX=224308 GN=fatR PE=4 SV=1	TetR family transcriptional regulator [Bacillus pumilus]
gene1300	1.11008	2.22016	0	0	-Inf	1	1	gi|111111112|ref|scaffold2.1|	289944	290708	+	764	gene1300	GO:0008152;GO:0044238;GO:0019538;GO:0043170;GO:0071704;GO:0006508;GO:0003824;GO:0016787;GO:0016740;GO:0016746;GO:0008233	-	ENOG4105SM8	S	sp|P54549|YQJL_BACSU|Uncharacterized protein YqjL OS=Bacillus subtilis (strain 168) OX=224308 GN=yqjL PE=4 SV=1	alpha/beta hydrolase [Bacillus pumilus] AKC66537.1 hypothetical protein VT48_10995 [Bacillus pumilus] BAT49260.1 hydrolase [Bacillus pumilus]
gene1302	0.322551	0.645103	0	0	-Inf	1	1	gi|111111112|ref|scaffold2.1|	292200	293129	-	929	gene1302	GO:0008152;GO:0090304;GO:0090305;GO:0034641;GO:0006807;GO:1901360;GO:0006139;GO:0071704;GO:0009987;GO:0006725;GO:0046483;GO:0044238;GO:0044237;GO:0043170;GO:0034660;GO:0034470;GO:0044260;GO:0010467;GO:0008033;GO:0016070;GO:0006399;GO:0006396;GO:0042779;GO:0042780;GO:0031123;GO:0043628;GO:0090501;GO:0016787;GO:0003824;GO:0016788;GO:0004518;GO:0004540;GO:0004519;GO:0016893;GO:0004521;GO:0016891;GO:…	K00784	ENOG4105IES	S	sp|A7Z6F0|RNZ_BACVZ|Ribonuclease Z OS=Bacillus velezensis (strain DSM 23117 / BGSC 10A6 / FZB42) OX=326423 GN=rnz PE=3 SV=1	ribonuclease Z [Bacillus altitudinis] KJF47965.1 ribonuclease Z [Bacillus altitudinis]
gene1304	0.12148	0.242961	0	0	-Inf	1	1	gi|111111112|ref|scaffold2.1|	294878	295630	-	752	gene1304	GO:0019222;GO:0031326;GO:0031323;GO:0050789;GO:0080090;GO:2000112;GO:0060255;GO:0065007;GO:0010468;GO:0019219;GO:0009889;GO:0050794;GO:0051171;GO:2001141;GO:0051252;GO:0006355;GO:0010556;GO:0032774;GO:0090304;GO:0044249;GO:0034641;GO:0006807;GO:0034645;GO:1901362;GO:1901360;GO:0006139;GO:0044260;GO:0071704;GO:0010467;GO:0018130;GO:1901576;GO:0006725;GO:0009987;GO:0009058;GO:0009059;GO:0008152;GO:…	K03492	ENOG4108SGB	K	sp|O05509|GMUR_BACSU|HTH-type transcriptional regulator GmuR OS=Bacillus subtilis (strain 168) OX=224308 GN=gmuR PE=1 SV=1	family transcriptional regulator [Bacillus stratosphericus LAMA 585]
gene1305	0.146614	0.293229	0	0	-Inf	1	1	gi|111111112|ref|scaffold2.1|	295776	296960	-	1184	gene1305	GO:0008152;GO:0005975;GO:0071704;GO:0044238;GO:1901575;GO:0009056;GO:0016052;GO:0044262;GO:0044275;GO:0009987;GO:0044723;GO:0044724;GO:0044237;GO:0000272;GO:0009057;GO:0005976;GO:0043170;GO:0030243;GO:0030245;GO:0009251;GO:0044247;GO:0044264;GO:0044260;GO:0006073;GO:0051273;GO:0044042;GO:0051275;GO:0004553;GO:0016798;GO:0016787;GO:0003824;GO:0008422;GO:0015926;GO:0008706	K01223	ENOG4105CS2	G	sp|O05508|GMUD_BACSU|6-phospho-beta-glucosidase GmuD OS=Bacillus subtilis (strain 168) OX=224308 GN=gmuD PE=1 SV=1	6-phospho-beta-glucosidase [Bacillus pumilus] AMB90283.1 6-phospho-beta-glucosidase [Bacillus pumilus]
gene1306	0.125669	0.251339	0	0	-Inf	1	1	gi|111111112|ref|scaffold2.1|	297166	298512	-	1346	gene1306	GO:0051179;GO:0044699;GO:0008643;GO:0071702;GO:0006810;GO:0044765;GO:0051234;GO:0034219;GO:0015992;GO:0015672;GO:0006818;GO:0006812;GO:0006811;GO:0009401;GO:0034220;GO:0044763;GO:0008152;GO:0055085;GO:0009987;GO:0015291;GO:1901476;GO:0016740;GO:0005402;GO:0015144;GO:0022804;GO:0015295;GO:0015294;GO:0005351;GO:0015293;GO:0051119;GO:0005215;GO:0008324;GO:0003824;GO:0022891;GO:0022892;GO:0008982;GO:…	K02761	ENOG4105CK1	G	sp|O05507|PTEC_BACSU|PTS system oligo-beta-mannoside-specific EIIC component OS=Bacillus subtilis (strain 168) OX=224308 GN=gmuC PE=1 SV=1	PTS system, cellobiose-specific IIC component [Bacillus altitudinis] KJF47969.1 oligo-beta-mannoside permease IIC protein [Bacillus altitudinis]
gene1307	0.00418898	0.00837796	0	0	-Inf	1	1	gi|111111112|ref|scaffold2.1|	298538	298870	-	332	gene1307	GO:0051179;GO:0044699;GO:0008643;GO:0071702;GO:0006810;GO:0044765;GO:0051234;GO:0034219;GO:0015992;GO:0015672;GO:0006818;GO:0006812;GO:0006811;GO:0009401;GO:0034220;GO:0044763;GO:0055085;GO:0009987;GO:0008152;GO:0015291;GO:1901476;GO:0005402;GO:0015144;GO:0022804;GO:0015295;GO:0015294;GO:0005351;GO:0015293;GO:0051119;GO:0005215;GO:0008324;GO:0022891;GO:0022892;GO:0015075;GO:0022857;GO:0016740;GO:…	K02759	ENOG4105VCP	G	sp|O05506|PTEA_BACSU|PTS system oligo-beta-mannoside-specific EIIA component OS=Bacillus subtilis (strain 168) OX=224308 GN=gmuA PE=1 SV=2	PTS lactose/cellobiose transporter subunit IIA [Bacillus pumilus] AHL71985.1 PTS dihydroxyacetone transporter [Bacillus pumilus]
gene1308	0.00837796	0.0167559	0	0	-Inf	1	1	gi|111111112|ref|scaffold2.1|	298874	299185	-	311	gene1308	GO:0006810;GO:0008643;GO:0044765;GO:0071702;GO:0051179;GO:0051234;GO:0044699;GO:0055085;GO:0009987;GO:0009401;GO:0044763;GO:0008152;GO:0034219;GO:0022891;GO:0022892;GO:0008982;GO:0016773;GO:0016772;GO:1901476;GO:0022857;GO:0003824;GO:0016740;GO:0005215;GO:0015144;GO:0022804	K02760	ENOG4105VZJ	G	sp|O05505|PTEB_BACSU|PTS system oligo-beta-mannoside-specific EIIB component OS=Bacillus subtilis (strain 168) OX=224308 GN=gmuB PE=1 SV=1	PTS system, cellobiose-specific IIB component [Bacillus sp. nio-1130]
gene1309	0.532	1.064	0	0	-Inf	1	1	gi|111111112|ref|scaffold2.1|	299623	300612	+	989	gene1309	-	-	ENOG410690Z	S	-	hypothetical protein [Bacillus pumilus]
gene131	0.00837796	0.0167559	0	0	-Inf	1	1	gi|111111111|ref|scaffold1.1|	126043	126753	-	710	gene131	GO:0016020;GO:0016021;GO:0044425;GO:0031224	-	ENOG4107VMU	S	sp|P96697|YDFS_BACSU|UPF0702 transmembrane protein YdfS OS=Bacillus subtilis (strain 168) OX=224308 GN=ydfS PE=3 SV=1	DUF421 domain-containing protein [Bacillus pumilus] ALM29209.1 hypothetical protein AKO65_14700 [Bacillus pumilus] ALM45747.1 hypothetical protein AMR71_11015 [Bacillus pumilus] ANY97227.1 hypothetical protein AKO66_11020 [Bacillus pumilus]
gene1310	0.0502678	0.100536	0	0	-Inf	1	1	gi|111111112|ref|scaffold2.1|	300738	301523	-	785	gene1310	GO:0055114;GO:0044710;GO:0008152;GO:0016491;GO:0003824;GO:0016614;GO:0016616;GO:0047936	K00034	ENOG4105H9W	S	sp|P12310|DHG_BACSU|Glucose 1-dehydrogenase OS=Bacillus subtilis (strain 168) OX=224308 GN=gdh PE=2 SV=2	sugar dehydrogenase [Bacillus stratosphericus] OQP22450.1 sugar dehydrogenase [Bacillus stratosphericus]
gene1311	0.0209449	0.0418898	0	0	-Inf	1	1	gi|111111112|ref|scaffold2.1|	301536	302417	-	881	gene1311	GO:0051179;GO:0034219;GO:0044699;GO:0008643;GO:0071702;GO:0009987;GO:0006810;GO:0044765;GO:0044763;GO:0051234;GO:0055085;GO:0015762;GO:0008645;GO:0035428;GO:0015749;GO:0022891;GO:0022892;GO:1901476;GO:0005215;GO:0022857;GO:0015144;GO:0051119;GO:0015149;GO:0015145;GO:0015153;GO:0016020;GO:0016021;GO:0044425;GO:0031224;GO:0044464;GO:0005623;GO:0071944;GO:0005886	K05340	ENOG4105CSC	G	sp|Q81KM7|GLCU_BACAN|Probable glucose uptake protein GlcU OS=Bacillus anthracis OX=1392 GN=glcU PE=3 SV=1	glucose transporter GlcU [Bacillus pumilus] ANT57163.1 glucose transporter GlcU [Bacillus pumilus]
gene1313	0.28904	0.578079	0	0	-Inf	1	1	gi|111111112|ref|scaffold2.1|	304008	305264	-	1256	gene1313	GO:0090304;GO:0034641;GO:0006807;GO:0006139;GO:0044260;GO:1901360;GO:0071704;GO:0009987;GO:0006725;GO:0008152;GO:0046483;GO:0044238;GO:0044237;GO:0043170;GO:0006259;GO:0044699;GO:0051716;GO:0006281;GO:0006974;GO:0044763;GO:0050896;GO:0006950;GO:0033554;GO:0006260;GO:0044249;GO:0034645;GO:1901576;GO:0009058;GO:0009059;GO:0006261;GO:0034061;GO:0005488;GO:0003676;GO:0003677;GO:1901363;GO:0003887;GO:…	K02346	ENOG4105CQ3	L	sp|P54545|DPO41_BACSU|DNA polymerase IV 1 OS=Bacillus subtilis (strain 168) OX=224308 GN=dinB1 PE=3 SV=2	DNA polymerase IV [Bacillus altitudinis] KLV24561.1 DNA polymerase IV [Bacillus altitudinis]
gene1314	0.192693	0.385386	0	0	-Inf	1	1	gi|111111112|ref|scaffold2.1|	305370	305666	+	296	gene1314	-	-	-	-	sp|Q7WY64|MIFM_BACSU|Membrane protein insertion and folding monitor OS=Bacillus subtilis (strain 168) OX=224308 GN=mifM PE=1 SV=1	hypothetical protein [Bacillus sp. TH007] KRV45375.1 hypothetical protein AS196_03210 [Bacillus sp. TH007]
gene1316	4.25181	8.50363	0	0	-Inf	1	1	gi|111111112|ref|scaffold2.1|	306637	306966	-	329	gene1316	GO:0040011;GO:0044700;GO:0051716;GO:0006935;GO:0009605;GO:0050896;GO:0009987;GO:0044763;GO:0050794;GO:0065007;GO:0042330;GO:0023052;GO:0007165;GO:0042221;GO:0007154;GO:0050789;GO:0044699;GO:0060089;GO:0004871;GO:0044464;GO:0005623;GO:0005622	K03408	ENOG4105KJU	T	-	purine-binding chemotaxis protein [Bacillus stratosphericus LAMA 585]
gene1317	11.2223	22.4446	0	0	-Inf	1	1	gi|111111112|ref|scaffold2.1|	307116	308237	-	1121	gene1317	GO:0008152;GO:0071704;GO:0044238;GO:0019538;GO:0043170;GO:0006508;GO:1901564;GO:0043603;GO:0009987;GO:0044237;GO:0034641;GO:0006807;GO:0006518;GO:0016787;GO:0003824;GO:0008233;GO:0070011;GO:0008237;GO:0004177;GO:0008238;GO:0045148;GO:0034701;GO:0043169;GO:0043167;GO:0005488;GO:0046872;GO:0046914;GO:0008270;GO:0005737;GO:0044424;GO:0044464;GO:0005623;GO:0005622	K01258	ENOG4105D42	E	sp|P54542|YQJE_BACSU|Uncharacterized protein YqjE OS=Bacillus subtilis (strain 168) OX=224308 GN=yqjE PE=3 SV=2	deacylase [Bacillus stratosphericus LAMA 585]
gene1318	0.783339	1.56668	0	0	-Inf	1	1	gi|111111112|ref|scaffold2.1|	308254	309573	-	1319	gene1318	GO:0008152;GO:0006631;GO:0019752;GO:0044281;GO:0044710;GO:0071704;GO:0006629;GO:0009987;GO:0032787;GO:0043436;GO:0044255;GO:0044238;GO:0006082;GO:0044237;GO:0006633;GO:0044249;GO:0044283;GO:0072330;GO:1901576;GO:0044711;GO:0009058;GO:0008610;GO:0046394;GO:0016053;GO:0003824;GO:0016874;GO:0016740;GO:0016885;GO:0016421;GO:0003989;GO:0004658;GO:0016743;GO:0016741;GO:0047154;GO:0005737;GO:0043234;GO:…	K01966	ENOG4108HNZ	I	sp|P54541|PCCB_BACSU|Putative propionyl-CoA carboxylase beta chain OS=Bacillus subtilis (strain 168) OX=224308 GN=yqjD PE=3 SV=2	methylmalonyl-CoA carboxyltransferase [Bacillus stratosphericus] KML00183.1 methylmalonyl-CoA carboxyltransferase [Bacillus stratosphericus] KML54311.1 methylmalonyl-CoA carboxyltransferase [Bacillus stratosphericus]
gene132	13.2874	26.5749	0	0	-Inf	1	1	gi|111111111|ref|scaffold1.1|	126818	129034	-	2216	gene132	GO:0008152;GO:0009987;GO:0044237;GO:0006796;GO:0006793;GO:0016311;GO:0016310;GO:0003824;GO:0016787;GO:0016788;GO:0042578;GO:0016791;GO:0008081;GO:0016772;GO:0016301;GO:0004721;GO:0004113;GO:0016740;GO:0004112;GO:0016874	-	ENOG4108WBA	T	sp|P43075|TRNL_CANAL|tRNA ligase OS=Candida albicans (strain SC5314 / ATCC MYA-2876) OX=237561 GN=LIG1 PE=1 SV=2	Bis(5'-nucleosyl)-tetraphosphatase prpE [asymmetrical] [Streptococcus pneumoniae]
gene1320	0.00837796	0.0167559	0	0	-Inf	1	1	gi|111111112|ref|scaffold2.1|	310366	310893	-	527	gene1320	GO:0008152;GO:0003824;GO:0016740	-	ENOG4108QQZ	M	sp|P54539|YQJB_BACSU|Putative L,D-transpeptidase YqjB OS=Bacillus subtilis (strain 168) OX=224308 GN=yqjB PE=3 SV=1	protein srfk [Bacillus stratosphericus LAMA 585]
gene1321	0.213638	0.427276	0	0	-Inf	1	1	gi|111111112|ref|scaffold2.1|	310928	311881	-	953	gene1321	-	-	ENOG4108QEG	S	sp|P54538|YQJA_BACSU|Uncharacterized protein YqjA OS=Bacillus subtilis (strain 168) OX=224308 GN=yqjA PE=4 SV=2	hypothetical protein [Bacillus pumilus] AKU32893.1 hypothetical protein ID12_16240 [Bacillus pumilus]
gene1322	0.477544	0.955087	0	0	-Inf	1	1	gi|111111112|ref|scaffold2.1|	311993	312475	-	482	gene1322	GO:0006200;GO:0046434;GO:0009166;GO:0009167;GO:0044281;GO:0009161;GO:0046130;GO:1901360;GO:0009169;GO:0044710;GO:0009199;GO:0042454;GO:0009207;GO:0009205;GO:0009203;GO:0046034;GO:0046128;GO:0046483;GO:0009164;GO:1901564;GO:1901565;GO:0034641;GO:0006163;GO:0019637;GO:0009141;GO:0009143;GO:0009144;GO:0009146;GO:0006807;GO:0006195;GO:1901575;GO:1901361;GO:0009150;GO:0009154;GO:0009158;GO:0046700;GO:…	K23060	ENOG4105CDA	E	sp|P54537|ARTM_BACSU|Arginine transport ATP-binding protein ArtM OS=Bacillus subtilis (strain 168) OX=224308 GN=artM PE=1 SV=1	amino acid ABC transporter ATP-binding protein [Bacillus pumilus] AKC66558.1 peptide ABC transporter ATP-binding protein [Bacillus pumilus]
gene1323	0.263906	0.527811	0	0	-Inf	1	1	gi|111111112|ref|scaffold2.1|	312708	313364	-	656	gene1323	GO:0006810;GO:0051234;GO:0051179;GO:0005215;GO:0016020;GO:0044464;GO:0005623;GO:0071944;GO:0005886;GO:0016021;GO:0044425;GO:0031224	K17077	ENOG4105DRP	E	sp|P54536|ARTQ_BACSU|Arginine transport system permease protein ArtQ OS=Bacillus subtilis (strain 168) OX=224308 GN=artQ PE=1 SV=1	L-arginine ABC transporter membrane protein [Bacillus sp. ru9509.4] SIT90640.1 L-arginine ABC transporter membrane protein [Bacillus sp. RRD69]
gene1324	0.444032	0.888064	0	0	-Inf	1	1	gi|111111112|ref|scaffold2.1|	313489	314253	-	764	gene1324	GO:0006810;GO:0051234;GO:0051179;GO:0005215;GO:0005623;GO:0044464;GO:0044462;GO:0030313;GO:0031975;GO:0071944;GO:0042597;GO:0030288;GO:0030312	K23059	ENOG4107XX8	T	sp|P54535|ARTP_BACSU|Arginine-binding extracellular protein ArtP OS=Bacillus subtilis (strain 168) OX=224308 GN=artP PE=1 SV=1	ABC transporter substrate-binding protein [Bacillus pumilus] AHL72000.1 ABC transporter substrate-binding protein [Bacillus pumilus]
gene1325	0.393764	0.787528	0	0	-Inf	1	1	gi|111111112|ref|scaffold2.1|	314450	314887	-	437	gene1325	-	-	ENOG4108Y6J	S	sp|P54534|YQIW_BACSU|UPF0403 protein YqiW OS=Bacillus subtilis (strain 168) OX=224308 GN=yqiW PE=3 SV=1	hypothetical protein [Bacillus pumilus] KIL27337.1 hypothetical protein B4133_2427 [Bacillus pumilus]
gene1326	4.76287	9.52574	0	0	-Inf	1	1	gi|111111112|ref|scaffold2.1|	315055	315948	+	893	gene1326	GO:0016310;GO:0023052;GO:0007165;GO:0007166;GO:0050789;GO:0044699;GO:0051716;GO:0065007;GO:0007186;GO:0009987;GO:0050794;GO:0044763;GO:0008152;GO:0007154;GO:0044700;GO:0050896;GO:0007205;GO:0044237;GO:0006796;GO:0006793;GO:0044249;GO:1901576;GO:0071704;GO:0006644;GO:0006629;GO:0044238;GO:0044710;GO:0009058;GO:0044255;GO:0090407;GO:0008610;GO:0008654;GO:0019637;GO:0016740;GO:0004143;GO:0016301;GO:…	-	ENOG4107VPS	I	sp|P39074|BMRU_BACSU|Putative lipid kinase BmrU OS=Bacillus subtilis (strain 168) OX=224308 GN=bmrU PE=1 SV=2	lipid kinase [Bacillus altitudinis] KDE30861.1 diacylglycerol kinase [Bacillus altitudinis 41KF2b]
gene1327	0.184315	0.36863	0	0	-Inf	1	1	gi|111111112|ref|scaffold2.1|	315963	316298	-	335	gene1327	-	-	-	-	-	hypothetical protein C883_3327 [Bacillus stratosphericus LAMA 585]
gene1328	86.8376	173.675	0	0	-Inf	1	1	gi|111111112|ref|scaffold2.1|	316325	317566	-	1241	gene1328	GO:0008152;GO:0009987;GO:0044237;GO:0044710;GO:0006091;GO:0044238;GO:0055114;GO:0006099;GO:0009060;GO:0045333;GO:0015980;GO:0071704;GO:0019752;GO:0044281;GO:0043436;GO:0006082;GO:0006090;GO:0032787;GO:0016746;GO:0016740;GO:0003824;GO:0016747;GO:0016417;GO:0004149;GO:0016748;GO:0016751;GO:0016407;GO:0030523;GO:0016418;GO:0004742;GO:0005737;GO:0043234;GO:0032991;GO:0044464;GO:0005623;GO:0005622;GO:…	K09699	ENOG4105C7S	C	sp|P37942|ODB2_BACSU|Lipoamide acyltransferase component of branched-chain alpha-keto acid dehydrogenase complex OS=Bacillus subtilis (strain 168) OX=224308 GN=bfmBB PE=3 SV=1	branched-chain alpha-keto acid dehydrogenase subunit E2 [Bacillus sp. RRD69] SIT90671.1 branched-chain alpha-keto acid dehydrogenase E2 component [Bacillus sp. RRD69]
gene1331	65.0423	130.085	0	0	-Inf	1	1	gi|111111112|ref|scaffold2.1|	319607	320728	-	1121	gene1331	GO:0008152;GO:0044710;GO:0009987;GO:0055114;GO:0019725;GO:0050789;GO:0065007;GO:0065008;GO:0050794;GO:0044699;GO:0045454;GO:0042592;GO:0044763;GO:0016491;GO:0003824;GO:0005488;GO:0043167;GO:1901363;GO:1901265;GO:0043168;GO:0050662;GO:0050660;GO:0000166;GO:0036094;GO:0048037;GO:0097159;GO:0016668;GO:0016667;GO:0016651;GO:0004148;GO:0016152;GO:0016722;GO:0016723;GO:0044464;GO:0005623;GO:0005737;GO:…	K00382	ENOG4107QN2	C	sp|P54533|DLDH2_BACSU|Dihydrolipoyl dehydrogenase OS=Bacillus subtilis (strain 168) OX=224308 GN=bfmBC PE=3 SV=1	dihydrolipoyl dehydrogenase [Bacillus altitudinis] OPW99239.1 dihydrolipoyl dehydrogenase [Bacillus altitudinis]
gene1332	39.1083	78.2166	0	0	-Inf	1	1	gi|111111112|ref|scaffold2.1|	321021	321944	-	923	gene1332	GO:0016310;GO:0009987;GO:0044237;GO:0006796;GO:0008152;GO:0006793;GO:0035639;GO:0005488;GO:0000166;GO:1901363;GO:0001883;GO:0001882;GO:0043168;GO:0043167;GO:0016740;GO:1901265;GO:0032549;GO:0017076;GO:0005524;GO:0016301;GO:0036094;GO:0003824;GO:0047761;GO:0030554;GO:0016772;GO:0016774;GO:0032559;GO:0097159;GO:0032555;GO:0032550;GO:0032553;GO:0044464;GO:0005623;GO:0005622;GO:0005737;GO:0044424	K00929	ENOG4105CKM	C	sp|P54532|BUK_BACSU|Probable butyrate kinase OS=Bacillus subtilis (strain 168) OX=224308 GN=buk PE=3 SV=2	butyrate kinase [Bacillus pumilus]
gene1333	40.1849	80.3698	0	0	-Inf	1	1	gi|111111112|ref|scaffold2.1|	322176	323270	-	1094	gene1333	GO:0006520;GO:0044710;GO:0008152;GO:0019752;GO:0006807;GO:0044281;GO:0071704;GO:0009987;GO:0043436;GO:0044238;GO:1901564;GO:0006082;GO:0044237;GO:0055114;GO:0003824;GO:0016491;GO:0016639;GO:0016638;GO:0050049	K00263	ENOG4107RDP	E	sp|P54531|DHLE_BACSU|Leucine dehydrogenase OS=Bacillus subtilis (strain 168) OX=224308 GN=yqiT PE=3 SV=1	Glu/Leu/Phe/Val dehydrogenase [Bacillus zhangzhouensis] KEP27168.1 leucine dehydrogenase [Bacillus zhangzhouensis]
gene1334	4.63301	9.26602	0	0	-Inf	1	1	gi|111111112|ref|scaffold2.1|	323296	324189	-	893	gene1334	GO:0008152;GO:0071704;GO:0009987;GO:0044237;GO:0006631;GO:0019752;GO:0044281;GO:0044710;GO:0019605;GO:0006629;GO:0032787;GO:0043436;GO:0044255;GO:0044238;GO:0006082;GO:0046459;GO:0003824;GO:0016740;GO:0016746;GO:0016747;GO:0050182	K00634	ENOG4107RE7	C	sp|P54530|PTB_BACSU|Probable phosphate butyryltransferase OS=Bacillus subtilis (strain 168) OX=224308 GN=yqiS PE=3 SV=2	phosphate butyryltransferase [Bacillus altitudinis] KDE30853.1 phosphate butyryltransferase [Bacillus altitudinis 41KF2b]
gene1335	1.51222	3.02444	0	0	-Inf	1	1	gi|111111112|ref|scaffold2.1|	324315	326387	-	2072	gene1335	GO:0006355;GO:0080090;GO:0019222;GO:0060255;GO:2001141;GO:0050789;GO:0065007;GO:0009889;GO:0050794;GO:0008152;GO:0010556;GO:0051252;GO:0031326;GO:0031323;GO:2000112;GO:0010468;GO:0019219;GO:0051171;GO:0009987;GO:0071704;GO:0044238;GO:0044237;GO:0006807;GO:0044260;GO:0043170;GO:1901362;GO:0046483;GO:0019438;GO:1901576;GO:1901360;GO:0018130;GO:0034654;GO:0016070;GO:0044271;GO:0006351;GO:0032774;GO:…	-	ENOG4108JUB	K	sp|P54529|YQIR_BACSU|Putative sigma L-dependent transcriptional regulator YqiR OS=Bacillus subtilis (strain 168) OX=224308 GN=yqiR PE=4 SV=1	AAA family ATPase [Bacillus pumilus] AMB90311.1 AAA family ATPase [Bacillus pumilus]
gene1337	0.0879686	0.175937	0	0	-Inf	1	1	gi|111111112|ref|scaffold2.1|	326807	327544	-	737	gene1337	GO:0019751;GO:0044281;GO:0044710;GO:0044262;GO:0071704;GO:0006071;GO:0019400;GO:0006629;GO:0008152;GO:0044238;GO:0005975;GO:0044237;GO:0006066;GO:0009987;GO:1901615;GO:0042578;GO:0008081;GO:0016787;GO:0016788;GO:0003824;GO:0008889	K01126	ENOG4108QXE	C	sp|P54527|YQIK_BACSU|Uncharacterized protein YqiK OS=Bacillus subtilis (strain 168) OX=224308 GN=yqiK PE=4 SV=2	glycerophosphodiester phosphodiesterase [Bacillus pumilus] AKC66573.1 hypothetical protein VT48_11180 [Bacillus pumilus]
gene1339	0.720505	1.44101	0	0	-Inf	1	1	gi|111111112|ref|scaffold2.1|	327771	328871	-	1100	gene1339	-	-	ENOG4108KVU	T	sp|P96649|RAPI_BACSU|Response regulator aspartate phosphatase I OS=Bacillus subtilis (strain 168) OX=224308 GN=rapI PE=1 SV=1	tetratricopeptide repeat protein [Bacillus pumilus] AKC66574.1 hypothetical protein VT48_11185 [Bacillus pumilus]
gene134	0.783339	1.56668	0	0	-Inf	1	1	gi|111111111|ref|scaffold1.1|	129347	130249	-	902	gene134	GO:0016020	-	ENOG4108PAA	S	-	EamA family transporter [Bacillus pumilus] AMB89874.1 multidrug transporter [Bacillus pumilus]
gene1340	2.93648	5.87295	0	0	-Inf	1	1	gi|111111112|ref|scaffold2.1|	329322	330041	-	719	gene1340	GO:0035556;GO:0050789;GO:0065007;GO:0050794;GO:0080090;GO:0019222;GO:0060255;GO:2001141;GO:0009889;GO:0006355;GO:0010556;GO:0031323;GO:0051252;GO:0031326;GO:2000112;GO:0010468;GO:0019219;GO:0051171;GO:0044699;GO:0009987;GO:0022603;GO:0050793;GO:0042173;GO:0045595;GO:0043937;GO:0044763;GO:0007165;GO:0051716;GO:0000160;GO:0044700;GO:0050896;GO:0023052;GO:0007154;GO:1901576;GO:0044260;GO:0008152;GO:…	K07699	ENOG4107QQR	T	sp|P06534|SP0A_BACSU|Stage 0 sporulation protein A OS=Bacillus subtilis (strain 168) OX=224308 GN=spo0A PE=1 SV=1	stage 0 sporulation protein a [Bacillus stratosphericus LAMA 585]
gene1341	0.12148	0.242961	0	0	-Inf	1	1	gi|111111112|ref|scaffold2.1|	330409	331674	-	1265	gene1341	GO:0008152;GO:0003824;GO:0016787	K06399	ENOG4105S1Z	M	sp|P17896|SP4B_BACSU|SpoIVB peptidase OS=Bacillus subtilis (strain 168) OX=224308 GN=spoIVB PE=1 SV=2	SpoIVB peptidase [Bacillus sp. RRD69] SIT90734.1 SpoIVB peptidase. Serine peptidase. MEROPS family S55 [Bacillus sp. RRD69]
gene1342	11.3605	22.721	0	0	-Inf	1	1	gi|111111112|ref|scaffold2.1|	331885	333507	-	1622	gene1342	GO:1901360;GO:0046483;GO:0006807;GO:0044260;GO:0008152;GO:0034641;GO:0006139;GO:0009987;GO:0006725;GO:0043170;GO:0090304;GO:0044237;GO:0071704;GO:0044238;GO:0006259;GO:0051716;GO:0006281;GO:0033554;GO:0006950;GO:0050896;GO:0044699;GO:0006974;GO:0044763;GO:0006310;GO:0035639;GO:0005488;GO:0043167;GO:1901363;GO:1901265;GO:0001882;GO:0043168;GO:0000166;GO:0001883;GO:0032549;GO:0017076;GO:0005524;GO:…	K03631	ENOG4105C4F	L	sp|P17894|RECN_BACSU|DNA repair protein RecN OS=Bacillus subtilis (strain 168) OX=224308 GN=recN PE=3 SV=2	DNA repair protein RecN [Bacillus pumilus] AHL72017.1 DNA recombination protein RecN [Bacillus pumilus]
gene1343	1.01792	2.03584	0	0	-Inf	1	1	gi|111111112|ref|scaffold2.1|	333653	334102	-	449	gene1343	GO:0006525;GO:0080090;GO:0019222;GO:2000112;GO:0044281;GO:1901362;GO:0044710;GO:0060255;GO:2001141;GO:0043436;GO:0046483;GO:1901564;GO:0019438;GO:0006807;GO:0009064;GO:0050789;GO:1901576;GO:0044260;GO:0065007;GO:1901360;GO:0018130;GO:0009889;GO:0050794;GO:0008152;GO:0034654;GO:0016070;GO:0044271;GO:0006355;GO:0010556;GO:0006351;GO:0032774;GO:0044249;GO:0034641;GO:0034645;GO:0006139;GO:1901605;GO:…	K03402	ENOG4105XBY	K	sp|A8FF09|ARGR_BACP2|Arginine repressor OS=Bacillus pumilus (strain SAFR-032) OX=315750 GN=argR PE=3 SV=1	arginine repressor [Bacillus pumilus] EDW21065.1 arginine repressor [Bacillus pumilus ATCC 7061] KMY21961.1 arginine repressor [Bacillus pumilus]
gene1346	0.61578	1.23156	0	0	-Inf	1	1	gi|111111112|ref|scaffold2.1|	337168	337950	-	782	gene1346	GO:0008152;GO:0044249;GO:0009987;GO:0009058;GO:0044237;GO:1901576;GO:0044710;GO:0071704;GO:0006629;GO:0006720;GO:0044255;GO:0008610;GO:0044238;GO:0008299;GO:0016740;GO:0003824;GO:0004659;GO:0016765;GO:0004337;GO:0004311	K13789	ENOG4105CTB	H	sp|P54383|ISPA_BACSU|Farnesyl diphosphate synthase OS=Bacillus subtilis (strain 168) OX=224308 GN=ispA PE=3 SV=2	geranyltranstransferase [Bacillus stratosphericus LAMA 585]
gene1347	0.00837796	0.0167559	0	0	-Inf	1	1	gi|111111112|ref|scaffold2.1|	338048	338275	-	227	gene1347	GO:0090305;GO:0034641;GO:0006807;GO:1901360;GO:0006139;GO:0090304;GO:0071704;GO:0009987;GO:0006725;GO:0008152;GO:0046483;GO:0044238;GO:0044237;GO:0043170;GO:0044248;GO:1901361;GO:0044265;GO:0044260;GO:0006308;GO:1901575;GO:0046700;GO:0006259;GO:0034655;GO:0009056;GO:0009057;GO:0044270;GO:0019439;GO:0016787;GO:0016796;GO:0004529;GO:0004518;GO:0004527;GO:0008855;GO:0016788;GO:0003824;GO:0016895;GO:…	K03602	ENOG41067QG	L	sp|A8FF13|EX7S_BACP2|Exodeoxyribonuclease 7 small subunit OS=Bacillus pumilus (strain SAFR-032) OX=315750 GN=xseB PE=3 SV=1	exodeoxyribonuclease VII small subunit [Bacillus australimaris] KPN15563.1 exodeoxyribonuclease VII small subunit [Bacillus australimaris]
gene1348	1.83058	3.66117	0	0	-Inf	1	1	gi|111111112|ref|scaffold2.1|	338292	339680	-	1388	gene1348	GO:0090305;GO:0034641;GO:0006807;GO:1901360;GO:0006139;GO:0090304;GO:0071704;GO:0009987;GO:0006725;GO:0008152;GO:0046483;GO:0044238;GO:0044237;GO:0043170;GO:0044248;GO:1901361;GO:0044265;GO:0044260;GO:0006308;GO:1901575;GO:0046700;GO:0006259;GO:0034655;GO:0009056;GO:0009057;GO:0044270;GO:0019439;GO:0016796;GO:0004529;GO:0004527;GO:0016787;GO:0008855;GO:0016788;GO:0003824;GO:0016895;GO:0004518;GO:…	K03601	ENOG4105DVS	L	sp|A8FF14|EX7L_BACP2|Exodeoxyribonuclease 7 large subunit OS=Bacillus pumilus (strain SAFR-032) OX=315750 GN=xseA PE=3 SV=1	exodeoxyribonuclease vii large subunit [Bacillus stratosphericus LAMA 585]
gene1349	13.388	26.776	0	0	-Inf	1	1	gi|111111112|ref|scaffold2.1|	339721	340572	-	851	gene1349	GO:0044281;GO:0044710;GO:0008152;GO:0009987;GO:0044237;GO:0055114;GO:1901360;GO:0006760;GO:0043436;GO:0046483;GO:1901564;GO:0006575;GO:0006807;GO:0051186;GO:0042558;GO:0006732;GO:1901605;GO:0006725;GO:0019752;GO:0006520;GO:0071704;GO:0006082;GO:0044238;GO:1901362;GO:1901566;GO:0019438;GO:1901576;GO:0018130;GO:0044271;GO:0044249;GO:0034641;GO:0009058;GO:0044283;GO:0044711;GO:0042398;GO:0016053;GO:…	K01491	ENOG4105CN0	H	sp|A8FF15|FOLD_BACP2|Bifunctional protein FolD OS=Bacillus pumilus (strain SAFR-032) OX=315750 GN=folD PE=3 SV=1	bifunctional 5,10-methylene-tetrahydrofolate dehydrogenase/5,10-methylene-tetrahydrofolate cyclohydrolase [Bacillus pumilus] AKU32920.1 5,10-methylene-tetrahydrofolate cyclohydrolase [Bacillus pumilus]
gene135	2.78567	5.57134	0	0	-Inf	1	1	gi|111111111|ref|scaffold1.1|	130388	131110	-	722	gene135	-	K00782	ENOG41080R8	S	sp|A8FDN6|LUTC_BACP2|Lactate utilization protein C OS=Bacillus pumilus (strain SAFR-032) OX=315750 GN=lutC PE=3 SV=1	lactate utilization protein C [Bacillus stratosphericus] OQP18689.1 lactate utilization protein C [Bacillus stratosphericus]
gene1350	2.24948	4.49896	0	0	-Inf	1	1	gi|111111112|ref|scaffold2.1|	340587	340979	-	392	gene1350	GO:0032774;GO:0019222;GO:0031326;GO:0031323;GO:0090304;GO:0044249;GO:0034641;GO:0006807;GO:0034645;GO:1901362;GO:0050789;GO:1901360;GO:0080090;GO:0006139;GO:0044260;GO:0071704;GO:2000112;GO:0060255;GO:0010467;GO:0065007;GO:0010468;GO:0018130;GO:1901576;GO:0019219;GO:0006725;GO:0009987;GO:0009889;GO:0050794;GO:0009058;GO:0009059;GO:0051171;GO:0008152;GO:2001141;GO:0034654;GO:0046483;GO:0016070;GO:…	K03625	ENOG4105M7K	K	sp|A8FF16|NUSB_BACP2|Transcription antitermination protein NusB OS=Bacillus pumilus (strain SAFR-032) OX=315750 GN=nusB PE=3 SV=1	N utilization substance protein B [Bacillus pumilus] KRU16241.1 N utilization substance protein B [Bacillus pumilus] AMM97845.1 antitermination protein NusB [Bacillus pumilus]
gene1352	2.86945	5.7389	0	0	-Inf	1	1	gi|111111112|ref|scaffold2.1|	341189	341602	-	413	gene1352	-	-	ENOG4108ZSR	S	sp|P54519|YQHY_BACSU|Uncharacterized protein YqhY OS=Bacillus subtilis (strain 168) OX=224308 GN=yqhY PE=3 SV=2	hypothetical protein [Bacillus pumilus]
gene1353	46.2589	92.5178	0	0	-Inf	1	1	gi|111111112|ref|scaffold2.1|	341622	342971	-	1349	gene1353	GO:0008152;GO:0003824;GO:0016874;GO:0016879;GO:0004075;GO:0005488;GO:1901363;GO:0097159;GO:0035639;GO:0043167;GO:0001883;GO:0001882;GO:0043168;GO:0000166;GO:1901265;GO:0032549;GO:0017076;GO:0005524;GO:0036094;GO:0030554;GO:0032559;GO:0032555;GO:0032550;GO:0032553;GO:0043169;GO:0046872;GO:0016885;GO:0016421;GO:0003989	K01961	ENOG4105CER	I	sp|P49787|ACCC1_BACSU|Biotin carboxylase 1 OS=Bacillus subtilis (strain 168) OX=224308 GN=accC1 PE=3 SV=3	acetyl-CoA carboxylase biotin carboxylase subunit [Bacillus sp. Leaf49] KQU10467.1 acetyl-CoA carboxylase biotin carboxylase subunit [Bacillus sp. Leaf49]
gene1354	1.85572	3.71144	0	0	-Inf	1	1	gi|111111112|ref|scaffold2.1|	342983	343465	-	482	gene1354	GO:0008152;GO:0006633;GO:0006631;GO:0019752;GO:0044249;GO:0044281;GO:0044283;GO:0072330;GO:1901576;GO:0044710;GO:0044711;GO:0071704;GO:0006629;GO:0009987;GO:0032787;GO:0009058;GO:0043436;GO:0044255;GO:0008610;GO:0044238;GO:0006082;GO:0046394;GO:0016053;GO:0044237;GO:0016885;GO:0003989;GO:0003824;GO:0016874;GO:0016421;GO:0005737;GO:0043234;GO:0032991;GO:0009317;GO:0044464;GO:0005623;GO:0005622;GO:…	K02160	ENOG4105KM4	I	sp|P49786|BCCP_BACSU|Biotin carboxyl carrier protein of acetyl-CoA carboxylase OS=Bacillus subtilis (strain 168) OX=224308 GN=accB PE=1 SV=2	acetyl-CoA carboxylase biotin carboxyl carrier protein subunit [Streptococcus pneumoniae]
gene1356	0.0209449	0.0418898	0	0	-Inf	1	1	gi|111111112|ref|scaffold2.1|	344292	344927	-	635	gene1356	-	K06396	ENOG4105WZE	S	sp|P49784|SP3AG_BACSU|Stage III sporulation protein AG OS=Bacillus subtilis (strain 168) OX=224308 GN=spoIIIAG PE=4 SV=3	stage iii sporulation protein ag [Bacillus stratosphericus LAMA 585]
gene1358	0.0251339	0.0502678	0	0	-Inf	1	1	gi|111111112|ref|scaffold2.1|	345603	346802	-	1199	gene1358	-	K06394	ENOG4105EWD	S	sp|P49782|SP3AE_BACSU|Stage III sporulation protein AE OS=Bacillus subtilis (strain 168) OX=224308 GN=spoIIIAE PE=1 SV=2	stage iii sporulation protein ae [Bacillus stratosphericus LAMA 585]
gene136	2.72284	5.44567	0	0	-Inf	1	1	gi|111111111|ref|scaffold1.1|	131107	132525	-	1418	gene136	GO:0044710;GO:0008152;GO:0055114;GO:0006082;GO:0019516;GO:0009987;GO:0006089;GO:0019752;GO:0032787;GO:0071704;GO:0044237;GO:0043436;GO:1901615;GO:0044281;GO:0022900;GO:0006091;GO:0051536;GO:0051540;GO:0005488;GO:0003824;GO:0016491;GO:0043169;GO:0051539;GO:0043167;GO:0046872	K18929	ENOG4107QR9	C	sp|A8FDN5|LUTB_BACP2|Lactate utilization protein B OS=Bacillus pumilus (strain SAFR-032) OX=315750 GN=lutB PE=3 SV=1	iron-sulfur cluster-binding protein [Bacillus altitudinis] OPW98765.1 iron-sulfur cluster-binding protein [Bacillus altitudinis]
gene1361	0.00418898	0.00837796	0	0	-Inf	1	1	gi|111111112|ref|scaffold2.1|	347452	347829	-	377	gene1361	-	K06391	ENOG4105KR5	S	sp|Q01368|SP3AB_BACSU|Stage III sporulation protein AB OS=Bacillus subtilis (strain 168) OX=224308 GN=spoIIIAB PE=1 SV=2	stage III sporulation protein SpoAB [Bacillus xiamenensis] EKF35385.1 stage III sporulation protein SpoAB [Bacillus xiamenensis] AOZ90078.1 stage III sporulation protein SpoAB [Bacillus xiamenensis]
gene1362	0.00418898	0.00837796	0	0	-Inf	1	1	gi|111111112|ref|scaffold2.1|	347961	348833	-	872	gene1362	GO:0008152;GO:0006810;GO:0051234;GO:0051179;GO:0005488;GO:1901363;GO:0000166;GO:1901265;GO:0036094;GO:0097159;GO:0016787;GO:0017111;GO:0003824;GO:0016818;GO:0016817;GO:0016462;GO:0035639;GO:0043167;GO:0001883;GO:0001882;GO:0043168;GO:0032549;GO:0017076;GO:0005524;GO:0030554;GO:0032559;GO:0032555;GO:0032550;GO:0032553;GO:0003676;GO:0044464;GO:0005623;GO:0005622	K06390	ENOG4105CD2	S	sp|Q01367|SP3AA_BACSU|Stage III sporulation protein AA OS=Bacillus subtilis (strain 168) OX=224308 GN=spoIIIAA PE=4 SV=1	stage III sporulation protein AA [Bacillus cellulasensis] APP17924.1 stage III sporulation protein AA [Bacillus pumilus]
gene1364	6.55575	13.1115	0	0	-Inf	1	1	gi|111111112|ref|scaffold2.1|	349606	350163	-	557	gene1364	GO:0044249;GO:1901576;GO:0071704;GO:0009987;GO:0009058;GO:0008152;GO:0044237;GO:0034645;GO:0044267;GO:0044260;GO:0010467;GO:0044238;GO:0009059;GO:0019538;GO:0043170;GO:0006414;GO:0006412;GO:0034641;GO:0006807;GO:0043043;GO:1901564;GO:0043604;GO:0044271;GO:1901566;GO:0043603;GO:0006518;GO:0097159;GO:0008135;GO:0003723;GO:0003676;GO:0003746;GO:1901363;GO:0005488;GO:0005737;GO:0044424;GO:0044464;GO:…	K02356	ENOG4105DRH	J	sp|A8FF29|EFP_BACP2|Elongation factor P OS=Bacillus pumilus (strain SAFR-032) OX=315750 GN=efp PE=3 SV=1	elongation factor P [Bacillus pumilus] KML13149.1 elongation factor P [Bacillus pumilus] KML50075.1 elongation factor P [Bacillus pumilus] KMN78549.1 elongation factor P [Bacillus pumilus]
gene1365	10.02	20.0401	0	0	-Inf	1	1	gi|111111112|ref|scaffold2.1|	350189	351250	-	1061	gene1365	GO:0008152;GO:0009987;GO:0044238;GO:0019538;GO:0043170;GO:0071704;GO:0006508;GO:0016787;GO:0003824;GO:0008233;GO:0070011;GO:0008238;GO:0004177;GO:0043169;GO:0043167;GO:0005488;GO:0046872;GO:0008237;GO:0008235;GO:0016805	K01262	ENOG4105DC7	E	sp|P54518|YQHT_BACSU|Uncharacterized peptidase YqhT OS=Bacillus subtilis (strain 168) OX=224308 GN=yqhT PE=3 SV=1	peptidase M24 family protein [Bacillus altitudinis] KWZ66619.1 Xaa-Pro dipeptidase [Bacillus altitudinis]
gene1366	0.351874	0.703749	0	0	-Inf	1	1	gi|111111112|ref|scaffold2.1|	351247	351690	-	443	gene1366	GO:0008152;GO:0009987;GO:0044281;GO:0044283;GO:0044710;GO:0044711;GO:0043436;GO:0016053;GO:1901576;GO:0046394;GO:0009058;GO:0044249;GO:0006082;GO:0019752;GO:0071704;GO:0044237;GO:0043650;GO:0043648;GO:0046417;GO:0009423;GO:1901362;GO:0009072;GO:0009073;GO:1901564;GO:1901566;GO:0019438;GO:0006807;GO:1901360;GO:0008652;GO:0006725;GO:0006520;GO:0044238;GO:0003855;GO:0016829;GO:0003824;GO:0016835;GO:…	K03786	ENOG4108Z38	E	sp|A8FF31|AROQ_BACP2|3-dehydroquinate dehydratase OS=Bacillus pumilus (strain SAFR-032) OX=315750 GN=aroQ PE=3 SV=1	type II 3-dehydroquinate dehydratase [Bacillus zhangzhouensis] KEP27136.1 3-dehydroquinate dehydratase [Bacillus zhangzhouensis]
gene1367	0.00837796	0.0167559	0	0	-Inf	1	1	gi|111111112|ref|scaffold2.1|	351800	352327	-	527	gene1367	-	-	ENOG4105Q4H	S	sp|P54516|YQHR_BACSU|Uncharacterized protein YqhR OS=Bacillus subtilis (strain 168) OX=224308 GN=yqhR PE=4 SV=1	hypothetical protein [Bacillus pumilus] AKC66600.1 hypothetical protein VT48_11320 [Bacillus pumilus]
gene1368	9.72262	19.4452	0	0	-Inf	1	1	gi|111111112|ref|scaffold2.1|	352549	353505	+	956	gene1368	-	-	ENOG4105CBJ	J	sp|P54515|YQHQ_BACSU|Uncharacterized protein YqhQ OS=Bacillus subtilis (strain 168) OX=224308 GN=yqhQ PE=4 SV=2	membrane protein [Bacillus pumilus] AHL72042.1 membrane protein [Bacillus pumilus]
gene1369	55.9145	111.829	0	0	-Inf	1	1	gi|111111112|ref|scaffold2.1|	353544	353939	+	395	gene1369	-	-	ENOG4106A7W	S	sp|P54514|YQHP_BACSU|Uncharacterized protein YqhP OS=Bacillus subtilis (strain 168) OX=224308 GN=yqhP PE=4 SV=1	hypothetical protein BACPU_24990 [Bacillus pumilus]
gene137	0.444032	0.888064	0	0	-Inf	1	1	gi|111111111|ref|scaffold1.1|	132553	133269	-	716	gene137	GO:0044710;GO:0008152;GO:0055114;GO:0006082;GO:0009987;GO:0006089;GO:0019752;GO:0032787;GO:0071704;GO:0044237;GO:0043436;GO:1901615;GO:0044281;GO:0003824;GO:0016491;GO:0051540;GO:0051536;GO:0051912;GO:0005488;GO:0016667	K18928	ENOG4107R5T	C	sp|A8FDN4|LUTA_BACP2|Lactate utilization protein A OS=Bacillus pumilus (strain SAFR-032) OX=315750 GN=lutA PE=3 SV=1	Fe-S oxidoreductase [Bacillus altitudinis] OPW98766.1 Fe-S oxidoreductase [Bacillus altitudinis]
gene1370	1.75518	3.51037	0	0	-Inf	1	1	gi|111111112|ref|scaffold2.1|	353936	354811	-	875	gene1370	GO:0044238;GO:0044710;GO:0006629;GO:0008152;GO:0071704;GO:0003824;GO:0016787	K07001	ENOG4107Y7I	S	sp|P54513|YQHO_BACSU|Uncharacterized protein YqhO OS=Bacillus subtilis (strain 168) OX=224308 GN=yqhO PE=3 SV=1	patatin family protein [Bacillus stratosphericus LAMA 585]
gene1371	0.774961	1.54992	0	0	-Inf	1	1	gi|111111112|ref|scaffold2.1|	355118	355537	-	419	gene1371	GO:0080090;GO:0019222;GO:0060255;GO:2001141;GO:0050789;GO:0065007;GO:0009889;GO:0050794;GO:0006355;GO:0010556;GO:0051252;GO:0031326;GO:0031323;GO:2000112;GO:0010468;GO:0019219;GO:0051171;GO:1901360;GO:0046483;GO:0006807;GO:0008152;GO:0034641;GO:0006139;GO:0009987;GO:0090304;GO:0043170;GO:0006725;GO:0071704;GO:0044238;GO:0044237;GO:1901362;GO:0019438;GO:1901576;GO:0044260;GO:0018130;GO:0034654;GO:…	-	ENOG4105KST	K	sp|A8FF36|MNTR_BACP2|Transcriptional regulator MntR OS=Bacillus pumilus (strain SAFR-032) OX=315750 GN=mntR PE=3 SV=1	manganese transport transcriptional regulator [Bacillus pumilus] AHL72045.1 manganese transport transcriptional regulator [Bacillus pumilus] CVM16392.1 metal-dependent transcriptional regulator [Streptococcus pneumoniae]
gene1372	1.84734	3.69468	0	0	-Inf	1	1	gi|111111112|ref|scaffold2.1|	355638	356543	-	905	gene1372	GO:0008152;GO:0043412;GO:0044267;GO:0044260;GO:0071704;GO:0009987;GO:0006464;GO:0036211;GO:0044238;GO:0019538;GO:0044237;GO:0043170;GO:0006633;GO:0006631;GO:0006732;GO:0018065;GO:0019752;GO:0044249;GO:0009108;GO:0044281;GO:0044283;GO:0009106;GO:0009107;GO:1901362;GO:0072330;GO:1901360;GO:0044710;GO:0044711;GO:0051188;GO:0046483;GO:0018130;GO:0009249;GO:0006629;GO:1901576;GO:0032787;GO:0009058;GO:…	K23734	ENOG4107S5Z	H	sp|P54511|LIPM_BACSU|Octanoyltransferase LipM OS=Bacillus subtilis (strain 168) OX=224308 GN=lipM PE=1 SV=2	lipoate-protein ligase a [Bacillus stratosphericus LAMA 585]
gene1373	0.703749	1.4075	0	0	-Inf	1	1	gi|111111112|ref|scaffold2.1|	356775	357074	+	299	gene1373	GO:0008152;GO:0044710;GO:0055114;GO:0003824;GO:0016740;GO:0004792;GO:0016782;GO:0016783;GO:0016491;GO:0005488;GO:0043167	-	ENOG4105PV6	P	sp|P54510|YQHL_BACSU|Uncharacterized protein YqhL OS=Bacillus subtilis (strain 168) OX=224308 GN=yqhL PE=4 SV=2	hypothetical protein BW16_11845 [Bacillus pumilus] AKU32943.1 hypothetical protein ID12_16500 [Bacillus pumilus] OJT61888.1 rhodanese-like domain-containing protein [Bacillus altitudinis] APP17923.1 rhodanese-like domain-containing protein [Bacillus pumilus] OPW88543.1 rhodanese-like domain-containing protein [Bacillus altitudinis] OQP22488.1 rhodanese-like domain-containing protein [Bacillus str…
gene1374	201.561	403.122	0	0	-Inf	1	1	gi|111111112|ref|scaffold2.1|	357114	358331	-	1217	gene1374	GO:0006546;GO:0044710;GO:0055114;GO:0008152;GO:0006520;GO:0019752;GO:0009063;GO:0006807;GO:0044281;GO:0044282;GO:0009069;GO:0044712;GO:0006544;GO:0071704;GO:1901605;GO:1901606;GO:0009987;GO:1901575;GO:0043436;GO:0009056;GO:0009071;GO:0044248;GO:0044238;GO:1901564;GO:1901565;GO:0006082;GO:0046395;GO:0016054;GO:0044237;GO:0019464;GO:0004375;GO:0016638;GO:0016642;GO:0003824;GO:0016491;GO:0030170;GO:…	K00283	ENOG4105CBI	E	sp|P54377|GCSPB_BACSU|Probable glycine dehydrogenase (decarboxylating) subunit 2 OS=Bacillus subtilis (strain 168) OX=224308 GN=gcvPB PE=3 SV=1	glycine dehydrogenase (aminomethyl-transferring) [Bacillus pumilus] AKC66607.1 glycine dehydrogenase [Bacillus pumilus]
gene1375	104.988	209.977	0	0	-Inf	1	1	gi|111111112|ref|scaffold2.1|	358567	359913	-	1346	gene1375	GO:0006546;GO:0006520;GO:0019752;GO:0009063;GO:0006807;GO:0044281;GO:0044282;GO:0009069;GO:0044712;GO:0044710;GO:0006544;GO:0055114;GO:0071704;GO:1901605;GO:1901606;GO:0009987;GO:1901575;GO:0008152;GO:0043436;GO:0009056;GO:0009071;GO:0044248;GO:0044238;GO:1901564;GO:1901565;GO:0006082;GO:0046395;GO:0016054;GO:0044237;GO:0034641;GO:1901360;GO:0006139;GO:0055086;GO:0006725;GO:0009116;GO:0046483;GO:…	K00282	ENOG4107QK8	E	sp|A8FF40|GCSPA_BACP2|Probable glycine dehydrogenase (decarboxylating) subunit 1 OS=Bacillus pumilus (strain SAFR-032) OX=315750 GN=gcvPA PE=3 SV=1	glycine dehydrogenase (aminomethyl-transferring) [Bacillus altitudinis] OJT61788.1 glycine dehydrogenase (aminomethyl-transferring) [Bacillus altitudinis]
gene1377	0.0628347	0.125669	0	0	-Inf	1	1	gi|111111112|ref|scaffold2.1|	361676	363259	+	1583	gene1377	GO:0008152;GO:0009987;GO:0044237;GO:0071704;GO:0044238;GO:1901360;GO:0046483;GO:0006807;GO:0034641;GO:0006139;GO:0006725;GO:0019222;GO:0060255;GO:0050789;GO:0065007;GO:0010468;GO:0080090;GO:2001141;GO:0009889;GO:0050794;GO:0006355;GO:0010556;GO:0051252;GO:0031326;GO:0031323;GO:2000112;GO:0019219;GO:0051171;GO:0044260;GO:0043170;GO:0090304;GO:1901362;GO:0019438;GO:1901576;GO:0018130;GO:0034654;GO:…	-	ENOG4105BZK	L	sp|P54509|YQHH_BACSU|Uncharacterized ATP-dependent helicase YqhH OS=Bacillus subtilis (strain 168) OX=224308 GN=yqhH PE=3 SV=1	ATP-dependent helicase [Bacillus pumilus] AMB90349.1 ATP-dependent helicase [Bacillus pumilus]
gene1378	0.0460788	0.0921576	0	0	-Inf	1	1	gi|111111112|ref|scaffold2.1|	363274	364071	+	797	gene1378	-	-	ENOG4105FHI	S	sp|P54508|YQHG_BACSU|Uncharacterized protein YqhG OS=Bacillus subtilis (strain 168) OX=224308 GN=yqhG PE=4 SV=1	hypothetical protein [Bacillus stratosphericus] KML00240.1 hypothetical protein VL05_16130 [Bacillus stratosphericus] KML52699.1 hypothetical protein VL17_13040 [Bacillus stratosphericus]
gene1379	0.32674	0.653481	0	0	-Inf	1	1	gi|111111112|ref|scaffold2.1|	364256	364420	+	164	gene1379	-	K06372	-	-	sp|P23308|SINI_BACSU|Protein SinI OS=Bacillus subtilis (strain 168) OX=224308 GN=sinI PE=1 SV=1	hypothetical protein [Bacillus sp. Leaf49]
gene138	0.259717	0.519434	0	0	-Inf	1	1	gi|111111111|ref|scaffold1.1|	133459	134310	-	851	gene138	GO:0008152;GO:0044710;GO:0055114;GO:0003824;GO:0016853;GO:0016491	K19267	ENOG4107SE8	M	sp|P39315|QOR2_ECOLI|Quinone oxidoreductase 2 OS=Escherichia coli (strain K12) OX=83333 GN=qorB PE=1 SV=1	NAD(P)-dependent oxidoreductase [Bacillus stratosphericus] OQP18684.1 NAD(P)-dependent oxidoreductase [Bacillus stratosphericus]
gene1380	0.339307	0.678615	0	0	-Inf	1	1	gi|111111112|ref|scaffold2.1|	364448	364789	+	341	gene1380	GO:0097159;GO:0005488;GO:0003676;GO:0003677;GO:1901363;GO:0043565	K19449	ENOG4108IMY	K	sp|P22753|SINR_BACLI|HTH-type transcriptional regulator SinR OS=Bacillus licheniformis OX=1402 GN=sinR PE=4 SV=1	transcriptional regulator [Bacillus stratosphericus LAMA 585]
gene1381	2.14476	4.28952	0	0	-Inf	1	1	gi|111111112|ref|scaffold2.1|	364857	365651	-	794	gene1381	-	K06336	ENOG4108YII	S	sp|P54507|COTN_BACSU|Spore coat-associated protein N OS=Bacillus subtilis (strain 168) OX=224308 GN=tasA PE=1 SV=1	spore coat protein [Bacillus altitudinis] KWZ66604.1 spore coat protein [Bacillus altitudinis]
gene1382	0.0712127	0.142425	0	0	-Inf	1	1	gi|111111112|ref|scaffold2.1|	365716	366288	-	572	gene1382	GO:0044238;GO:0051604;GO:1901564;GO:0044260;GO:0043603;GO:0044267;GO:0019538;GO:0009987;GO:0034641;GO:0044237;GO:0006465;GO:0071704;GO:0010467;GO:0006807;GO:0008152;GO:0016485;GO:0006518;GO:0043170;GO:0016787;GO:0003824;GO:0008233;GO:0017171;GO:0070011;GO:0008236;GO:0016020;GO:0016021;GO:0044425;GO:0031224	K13280	ENOG4105VFR	U	sp|P54506|LEPW_BACSU|Signal peptidase I W OS=Bacillus subtilis (strain 168) OX=224308 GN=sipW PE=1 SV=1	Signal peptidase I W [Streptococcus pneumoniae]
gene1383	0.0167559	0.0335118	0	0	-Inf	1	1	gi|111111112|ref|scaffold2.1|	366338	366865	-	527	gene1383	-	K19433	-	-	sp|P40949|YQXM_BACSU|Uncharacterized protein YqxM OS=Bacillus subtilis (strain 168) OX=224308 GN=yqxM PE=4 SV=2	amyloid fiber anchoring/assembly protein TapA [Bacillus altitudinis] KDE30805.1 hypothetical protein BA79_11033 [Bacillus altitudinis 41KF2b]
gene1388	0.0251339	0.0502678	0	0	-Inf	1	1	gi|111111112|ref|scaffold2.1|	368851	369237	-	386	gene1388	-	K02246	-	-	sp|P25956|COMGD_BACSU|ComG operon protein 4 OS=Bacillus subtilis (strain 168) OX=224308 GN=comGD PE=3 SV=1	competence protein ComGD [Bacillus altitudinis] KWZ66596.1 competence protein ComGD [Bacillus altitudinis]
gene139	1.27345	2.5469	0	0	-Inf	1	1	gi|111111111|ref|scaffold1.1|	134446	134730	-	284	gene139	-	-	ENOG4108B57	K	sp|P71036|YWNA_BACSU|Putative HTH-type transcriptional regulator YwnA OS=Bacillus subtilis (strain 168) OX=224308 GN=ywnA PE=1 SV=1	Rrf2 family transcriptional regulator [Bacillus pumilus] AHL71552.1 Rrf2 family transcriptional regulator [Bacillus pumilus]
gene1390	0.00418898	0.00837796	0	0	-Inf	1	1	gi|111111112|ref|scaffold2.1|	369600	370532	-	932	gene1390	-	K02244	ENOG41083BE	U	sp|P25954|COMGB_BACSU|ComG operon protein 2 OS=Bacillus subtilis (strain 168) OX=224308 GN=comGB PE=3 SV=1	competence protein ComGB [Bacillus pumilus] AMB90362.1 competence protein ComGB [Bacillus pumilus]
gene1391	0.0167559	0.0335118	0	0	-Inf	1	1	gi|111111112|ref|scaffold2.1|	370621	371640	-	1019	gene1391	GO:0006810;GO:0051234;GO:0051179;GO:0008152;GO:0015031;GO:0009987;GO:0044763;GO:0044699;GO:0008104;GO:0033036;GO:0045184;GO:0071702;GO:0044765;GO:0032940;GO:0009306;GO:0046903;GO:0055085;GO:0051649;GO:0051641;GO:0071806;GO:0015628;GO:0071840;GO:0009297;GO:0043711;GO:0022607;GO:0016043;GO:0030030;GO:0030031;GO:0044085;GO:0035639;GO:0005488;GO:0043167;GO:1901363;GO:1901265;GO:0001882;GO:0000166;GO:…	K02243	ENOG4107QHF	U	sp|P25953|COMGA_BACSU|ComG operon protein 1 OS=Bacillus subtilis (strain 168) OX=224308 GN=comGA PE=1 SV=2	type II/IV secretion system protein [Bacillus sp. TH007] KRV45302.1 competence protein ComG [Bacillus sp. TH007]
gene1392	2.77729	5.55459	0	0	-Inf	1	1	gi|111111112|ref|scaffold2.1|	372149	373018	-	869	gene1392	GO:0043168;GO:0043167;GO:0005543;GO:0005488;GO:0008289	K17763	ENOG4106JBC	T	sp|P54504|RSBRD_BACSU|RsbT co-antagonist protein RsbRD OS=Bacillus subtilis (strain 168) OX=224308 GN=rsbRD PE=1 SV=2	RsbT co-antagonist protein RsbRD [Bacillus altitudinis] KLV24635.1 RsbT co-antagonist protein RsbRD [Bacillus altitudinis]
gene1393	0.444032	0.888064	0	0	-Inf	1	1	gi|111111112|ref|scaffold2.1|	373244	373624	-	380	gene1393	GO:0008152;GO:0009892;GO:0032774;GO:0019222;GO:0031327;GO:0031326;GO:0031324;GO:0031323;GO:0090304;GO:0044249;GO:0010629;GO:0006807;GO:0034645;GO:1901362;GO:0050789;GO:1901360;GO:0080090;GO:0006139;GO:0010605;GO:0009890;GO:0044260;GO:0071704;GO:2000112;GO:2000113;GO:0060255;GO:0010467;GO:0065007;GO:0048519;GO:0010468;GO:0051172;GO:0018130;GO:0045934;GO:1901576;GO:0019219;GO:0006725;GO:0009987;GO:…	K00537	ENOG41090SU	K	sp|P54503|MGSR_BACSU|Regulatory protein MgsR OS=Bacillus subtilis (strain 168) OX=224308 GN=mgsR PE=1 SV=2	transcriptional regulator [Bacillus safensis] ARD56784.1 transcriptional regulator [Bacillus safensis]
gene1394	2.35002	4.70004	0	0	-Inf	1	1	gi|111111112|ref|scaffold2.1|	373801	374079	+	278	gene1394	-	-	ENOG4105UHZ	S	sp|P54502|YQGY_BACSU|Uncharacterized protein YqgY OS=Bacillus subtilis (strain 168) OX=224308 GN=yqgY PE=4 SV=1	YqgY [Bacillus subtilis QB928]
gene1395	0.733072	1.46614	0	0	-Inf	1	1	gi|111111112|ref|scaffold2.1|	374128	374772	-	644	gene1395	GO:0008152;GO:0003824;GO:0016787	K01069	ENOG4105C5X	Q	sp|P54501|YQGX_BACSU|Probable metallo-hydrolase YqgX OS=Bacillus subtilis (strain 168) OX=224308 GN=yqgX PE=3 SV=1	metal-binding hydrolase [Bacillus stratosphericus LAMA 585]
gene1396	0.00418898	0.00837796	0	0	-Inf	1	1	gi|111111112|ref|scaffold2.1|	374906	375100	+	194	gene1396	-	-	ENOG41066FG	S	sp|P54500|YQGW_BACSU|Uncharacterized protein YqgW OS=Bacillus subtilis (strain 168) OX=224308 GN=yqgW PE=4 SV=1	hypothetical protein BPUM_2210 [Bacillus pumilus SAFR-032]
gene1397	0.0418898	0.0837796	0	0	-Inf	1	1	gi|111111112|ref|scaffold2.1|	375125	375463	-	338	gene1397	-	-	ENOG4105N43	S	sp|P54499|YQGV_BACSU|UPF0045 protein YqgV OS=Bacillus subtilis (strain 168) OX=224308 GN=yqgV PE=3 SV=2	hypothetical protein C883_2709 [Bacillus stratosphericus LAMA 585]
gene1398	0.812662	1.62532	0	0	-Inf	1	1	gi|111111112|ref|scaffold2.1|	375517	376716	-	1199	gene1398	-	K08217	-	-	sp|O32203|YVQJ_BACSU|Uncharacterized MFS-type transporter YvqJ OS=Bacillus subtilis (strain 168) OX=224308 GN=yvqJ PE=3 SV=1	MFS transporter [Bacillus sp. UNC125MFCrub1.1]
gene1399	0.552945	1.10589	0	0	-Inf	1	1	gi|111111112|ref|scaffold2.1|	377101	378222	-	1121	gene1399	GO:0071704;GO:0006508;GO:0008152;GO:0044238;GO:0019538;GO:0043170;GO:0044248;GO:0044036;GO:0071840;GO:0044260;GO:0016998;GO:0071554;GO:0044699;GO:0009987;GO:0044763;GO:0009056;GO:0044237;GO:0008238;GO:0005488;GO:0008233;GO:0008235;GO:0008237;GO:0043169;GO:0046914;GO:0004181;GO:0004180;GO:0043167;GO:0070011;GO:0046872;GO:0016787;GO:0003824;GO:0008270	K01308	ENOG4107QKX	E	sp|P54497|YQGT_BACSU|Uncharacterized protein YqgT OS=Bacillus subtilis (strain 168) OX=224308 GN=yqgT PE=3 SV=1	hypothetical protein [Bacillus pumilus] AKC66632.1 hypothetical protein VT48_11485 [Bacillus pumilus]
gene14	1.01373	2.02747	0	0	-Inf	1	1	gi|111111111|ref|scaffold1.1|	15891	17015	-	1124	gene14	-	K02647	ENOG410815A	K	sp|P94536|YSFB_BACSU|Uncharacterized protein YsfB OS=Bacillus subtilis (strain 168) OX=224308 GN=ysfB PE=3 SV=2	carbohydrate diacid regulator [Bacillus pumilus]
gene140	0.230394	0.460788	0	0	-Inf	1	1	gi|111111111|ref|scaffold1.1|	134908	135495	-	587	gene140	GO:0008152;GO:0044710;GO:0055114;GO:0003824;GO:0051213;GO:0016702;GO:0016701;GO:0016491;GO:0016829	-	ENOG4105RTM	S	sp|A7GNY8|FOSB_BACCN|Metallothiol transferase FosB OS=Bacillus cytotoxicus (strain DSM 22905 / CIP 110041 / 391-98 / NVH 391-98) OX=315749 GN=fosB PE=3 SV=1	fosfomycin resistance protein [Bacillus stratosphericus LAMA 585]
gene1400	58.9557	117.911	0	0	-Inf	1	1	gi|111111112|ref|scaffold2.1|	378308	380227	-	1919	gene1400	GO:0008152;GO:0003824;GO:0016787;GO:0016788;GO:0008484;GO:0016740	K19005	ENOG4105E0M	M	sp|P54496|YQGS_BACSU|Lipoteichoic acid synthase-like YqgS OS=Bacillus subtilis (strain 168) OX=224308 GN=yqgS PE=3 SV=2	hypothetical protein [Bacillus pumilus] BAT49359.1 phosphatidylglycerol--membrane-oligosaccharide glycerophosphotransferase [Bacillus pumilus]
gene1401	3.50199	7.00397	0	0	-Inf	1	1	gi|111111112|ref|scaffold2.1|	380440	381393	-	953	gene1401	GO:0008152;GO:0016310;GO:0009987;GO:0044237;GO:0006796;GO:0006793;GO:0051156;GO:0044262;GO:0046835;GO:0071704;GO:0044238;GO:0005975;GO:1901135;GO:0019637;GO:0019320;GO:0046365;GO:0006091;GO:0006096;GO:1901575;GO:0019318;GO:0044723;GO:0009056;GO:0044724;GO:0005996;GO:0016052;GO:0006006;GO:0006007;GO:0016301;GO:0016740;GO:0003824;GO:0016772;GO:0019200;GO:0016773;GO:0004396;GO:0004340;GO:0044464;GO:…	K00845	ENOG4105DKQ	G	sp|P54495|GLK_BACSU|Glucokinase OS=Bacillus subtilis (strain 168) OX=224308 GN=glcK PE=1 SV=2	glucokinase [Bacillus pumilus] AKC66634.1 glucokinase [Bacillus pumilus]
gene1402	0.393764	0.787528	0	0	-Inf	1	1	gi|111111112|ref|scaffold2.1|	381407	381610	-	203	gene1402	-	-	ENOG41068Z9	S	sp|P54494|YQGQ_BACSU|Uncharacterized protein YqgQ OS=Bacillus subtilis (strain 168) OX=224308 GN=yqgQ PE=1 SV=1	hypothetical protein B4129_2318 [Bacillus pumilus]
gene1403	5.2069	10.4138	0	0	-Inf	1	1	gi|111111112|ref|scaffold2.1|	381681	383219	-	1538	gene1403	GO:0008152;GO:0044238;GO:0019538;GO:0043170;GO:0071704;GO:0006508;GO:0016787;GO:0004175;GO:0004252;GO:0017171;GO:0003824;GO:0070011;GO:0008233;GO:0008236;GO:0016020;GO:0016021;GO:0044425;GO:0031224	K19225	ENOG4107ZXI	S	sp|P54493|GLUP_BACSU|Rhomboid protease GluP OS=Bacillus subtilis (strain 168) OX=224308 GN=gluP PE=1 SV=2	rhomboid family intramembrane serine protease [Bacillus stratosphericus] KOA80747.1 peptidase S54 [Bacillus stratosphericus]
gene1404	0.0795906	0.159181	0	0	-Inf	1	1	gi|111111112|ref|scaffold2.1|	383306	383482	-	176	gene1404	-	-	-	-	sp|P54492|YQGO_BACSU|Uncharacterized protein YqgO OS=Bacillus subtilis (strain 168) OX=224308 GN=yqgO PE=4 SV=1	hypothetical protein [Bacillus pumilus]
gene1405	0.305796	0.611591	0	0	-Inf	1	1	gi|111111112|ref|scaffold2.1|	383918	384478	-	560	gene1405	GO:0008152;GO:0006732;GO:0019752;GO:0044249;GO:0034641;GO:0006807;GO:0009108;GO:0044281;GO:0044283;GO:1901362;GO:1901566;GO:1901360;GO:1901576;GO:0044710;GO:0009396;GO:0071704;GO:0006520;GO:0051188;GO:0042558;GO:0042559;GO:0042398;GO:1901605;GO:1901607;GO:0018130;GO:0006760;GO:0044238;GO:0009987;GO:0006725;GO:0009058;GO:0044711;GO:0043436;GO:1901564;GO:0046483;GO:0008652;GO:0044271;GO:0006575;GO:…	K01934	ENOG4105MK2	H	sp|P54491|YQGN_BACSU|Uncharacterized protein YqgN OS=Bacillus subtilis (strain 168) OX=224308 GN=yqgN PE=1 SV=1	5-formyltetrahydrofolate cyclo-ligase [Bacillus pumilus] AKC66638.1 hypothetical protein VT48_11515 [Bacillus pumilus]
gene1408	0.0837796	0.167559	0	0	-Inf	1	1	gi|111111112|ref|scaffold2.1|	385129	385476	+	347	gene1408	GO:0008152;GO:0032774;GO:0019222;GO:0031326;GO:0031323;GO:0090304;GO:0044249;GO:0034641;GO:0006807;GO:0034645;GO:1901362;GO:0050789;GO:1901360;GO:0080090;GO:0006139;GO:0044260;GO:0071704;GO:2000112;GO:0060255;GO:0010467;GO:0065007;GO:0010468;GO:0018130;GO:1901576;GO:0019219;GO:0006725;GO:0009987;GO:0009889;GO:0050794;GO:0009058;GO:0009059;GO:0051171;GO:2001141;GO:0034654;GO:0046483;GO:0016070;GO:…	-	ENOG4106DD7	S	sp|O32022|YQZD_BACSU|Uncharacterized protein YqzD OS=Bacillus subtilis (strain 168) OX=224308 GN=yqzD PE=4 SV=1	hypothetical protein [Bacillus zhangzhouensis] KEP27096.1 hypothetical protein BA70_15535 [Bacillus zhangzhouensis]
gene1409	2.41704	4.83408	0	0	-Inf	1	1	gi|111111112|ref|scaffold2.1|	385473	385973	+	500	gene1409	GO:0008152;GO:0003824;GO:0016829	-	ENOG41068DG	S	sp|O32023|YQZC_BACSU|Uncharacterized protein YqzC OS=Bacillus subtilis (strain 168) OX=224308 GN=yqzC PE=3 SV=2	hypothetical protein [Bacillus altitudinis] OJT61754.1 hypothetical protein BFP48_07605 [Bacillus altitudinis]
gene141	0.0795906	0.159181	0	0	-Inf	1	1	gi|111111111|ref|scaffold1.1|	135553	135984	+	431	gene141	-	-	ENOG4105NRR	S	sp|P96595|YDAT_BACSU|Uncharacterized protein YdaT OS=Bacillus subtilis (strain 168) OX=224308 GN=ydaT PE=4 SV=1	hypothetical protein [Bacillus stratosphericus] KOA73278.1 hypothetical protein ACR53_17725 [Bacillus stratosphericus]
gene1410	3.34281	6.68561	0	0	-Inf	1	1	gi|111111112|ref|scaffold2.1|	386018	386800	-	782	gene1410	GO:0006200;GO:0009987;GO:0046434;GO:0009166;GO:0009167;GO:0044281;GO:0009161;GO:0009128;GO:0046130;GO:1901360;GO:0009169;GO:0044710;GO:0009199;GO:0042454;GO:0009207;GO:0009205;GO:0009203;GO:0046034;GO:0046128;GO:0046483;GO:0044248;GO:1901564;GO:1901565;GO:0009164;GO:0006163;GO:0019637;GO:0009141;GO:0009143;GO:0009144;GO:0009146;GO:0006807;GO:0006195;GO:1901575;GO:1901361;GO:0009150;GO:0009158;GO:…	K02036	ENOG4105BZY	P	sp|Q65HC0|PSTB1_BACLD|Phosphate import ATP-binding protein PstB 1 OS=Bacillus licheniformis (strain ATCC 14580 / DSM 13 / JCM 2505 / NBRC 12200/ NCIMB 9375 / NRRL NRS-1264 / Gibson 46) OX=279010 GN=pstB1 PE=3 SV=1	phosphate ABC transporter ATP-binding protein [Bacillus pumilus]
gene1411	1.37399	2.74797	0	0	-Inf	1	1	gi|111111112|ref|scaffold2.1|	386816	387628	-	812	gene1411	GO:0006200;GO:0009987;GO:0046434;GO:0009166;GO:0009167;GO:0044281;GO:0009161;GO:0009128;GO:0046130;GO:1901360;GO:0009169;GO:0044710;GO:0009199;GO:0042454;GO:0009207;GO:0009205;GO:0009203;GO:0046034;GO:0046128;GO:0046483;GO:0044248;GO:1901564;GO:1901565;GO:0009164;GO:0006163;GO:0019637;GO:0009141;GO:0009143;GO:0009144;GO:0009146;GO:0006807;GO:0006195;GO:1901575;GO:1901361;GO:0009150;GO:0009158;GO:…	K02036	ENOG4105BZY	P	sp|Q65HB9|PSTB2_BACLD|Phosphate import ATP-binding protein PstB 2 OS=Bacillus licheniformis (strain ATCC 14580 / DSM 13 / JCM 2505 / NBRC 12200/ NCIMB 9375 / NRRL NRS-1264 / Gibson 46) OX=279010 GN=pstB2 PE=3 SV=1	phosphate ABC transporter ATP-binding protein [Bacillus sp. Leaf49] KQU10522.1 phosphate ABC transporter ATP-binding protein [Bacillus sp. Leaf49]
gene1413	1.68397	3.36794	0	0	-Inf	1	1	gi|111111112|ref|scaffold2.1|	388536	389462	-	926	gene1413	GO:0006810;GO:0051234;GO:0051179;GO:0044699;GO:0044765;GO:0006817;GO:0009987;GO:0055085;GO:0044763;GO:0006820;GO:0006811;GO:0015698;GO:0005215;GO:0022857;GO:0022804;GO:0015291;GO:0005315;GO:1901677;GO:0016020;GO:0016021;GO:0044425;GO:0031224;GO:0044464;GO:0005623;GO:0071944;GO:0005886	K02037	ENOG4105C8U	P	sp|P46339|YQGH_BACSU|Probable ABC transporter permease protein YqgH OS=Bacillus subtilis (strain 168) OX=224308 GN=yqgH PE=3 SV=2	phosphate ABC transporter permease subunit PstC [Bacillus stratosphericus] EMI12278.1 phosphate abc transporter permease [Bacillus stratosphericus LAMA 585]
gene1414	0.762394	1.52479	0	0	-Inf	1	1	gi|111111112|ref|scaffold2.1|	389542	390459	-	917	gene1414	GO:0006810;GO:0051234;GO:0051179	K02040	ENOG4105CVA	P	sp|P46338|PSTS_BACSU|Phosphate-binding protein PstS OS=Bacillus subtilis (strain 168) OX=224308 GN=pstS PE=3 SV=1	phosphate-binding protein [Bacillus pumilus] AMB90385.1 phosphate-binding protein [Bacillus pumilus]
gene1416	0.841985	1.68397	0	0	-Inf	1	1	gi|111111112|ref|scaffold2.1|	392932	394227	-	1295	gene1416	GO:0006810;GO:0055085;GO:0009987;GO:0044765;GO:0044763;GO:0051234;GO:0051179;GO:0044699;GO:0008643;GO:0071702;GO:0005215;GO:0044425;GO:0016021;GO:0016020;GO:0031224	K08222	ENOG4105E77	G	sp|P54487|YQGE_BACSU|Uncharacterized protein YqgE OS=Bacillus subtilis (strain 168) OX=224308 GN=yqgE PE=4 SV=2	efflux transporter [Bacillus stratosphericus LAMA 585]
gene1417	12.3826	24.7653	0	0	-Inf	1	1	gi|111111112|ref|scaffold2.1|	394342	394950	-	608	gene1417	GO:0009987;GO:0044710;GO:0055114;GO:0008152;GO:0006801;GO:0072593;GO:0044237;GO:0016491;GO:0016721;GO:0016209;GO:0003824;GO:0004784;GO:0005488;GO:0043167;GO:0043169;GO:0046872	K04564	ENOG4105CK4	P	sp|P54375|SODM_BACSU|Superoxide dismutase [Mn] OS=Bacillus subtilis (strain 168) OX=224308 GN=sodA PE=1 SV=5	superoxide dismutase [Bacillus australimaris] KPN15627.1 superoxide dismutase [Bacillus australimaris]
gene1418	0.138236	0.276473	0	0	-Inf	1	1	gi|111111112|ref|scaffold2.1|	395134	395529	-	395	gene1418	-	K09793	ENOG4105SXS	S	sp|P54486|YQGC_BACSU|Uncharacterized protein YqgC OS=Bacillus subtilis (strain 168) OX=224308 GN=yqgC PE=4 SV=1	hypothetical protein [Bacillus altitudinis] OJT61746.1 hypothetical protein BFP48_07560 [Bacillus altitudinis]
gene1419	1.064	2.128	0	0	-Inf	1	1	gi|111111112|ref|scaffold2.1|	395901	396515	+	614	gene1419	-	-	ENOG4106D2A	S	sp|P54485|YQGB_BACSU|Uncharacterized protein YqgB OS=Bacillus subtilis (strain 168) OX=224308 GN=yqgB PE=4 SV=2	DUF1189 domain-containing protein [Bacillus sp. L_1B0_12] KKK10099.1 hypothetical protein UF15_08535 [Bacillus sp. L_1B0_12]
gene142	0.414709	0.829418	0	0	-Inf	1	1	gi|111111111|ref|scaffold1.1|	136013	136861	-	848	gene142	GO:1901360;GO:0051716;GO:0006303;GO:0006302;GO:0046483;GO:0006281;GO:0033554;GO:0006807;GO:0044260;GO:0006950;GO:0008152;GO:0050896;GO:0034641;GO:0044699;GO:0006139;GO:0000726;GO:0009987;GO:0006725;GO:0006974;GO:0043170;GO:0090304;GO:0044237;GO:0071704;GO:0044763;GO:0044238;GO:0006259;GO:0046434;GO:0009166;GO:0009167;GO:0009164;GO:0044281;GO:0009161;GO:0046130;GO:0009169;GO:0009199;GO:0009207;GO:…	K10979	ENOG4105FDF	L	sp|O34859|KU_BACSU|Non-homologous end joining protein Ku OS=Bacillus subtilis (strain 168) OX=224308 GN=ku PE=2 SV=1	Ku protein [Bacillus stratosphericus] KOA73277.1 DNA repair protein [Bacillus stratosphericus]
gene1420	0.301607	0.603213	0	0	-Inf	1	1	gi|111111112|ref|scaffold2.1|	396555	397100	-	545	gene1420	GO:0008152;GO:0008080;GO:0016740;GO:0003824;GO:0016407;GO:0016746;GO:0016747;GO:0016410;GO:0034212;GO:0008999;GO:0004596	K03790	ENOG4105D9U	J	sp|O31633|YJCK_BACSU|Putative ribosomal-protein-alanine acetyltransferase OS=Bacillus subtilis (strain 168) OX=224308 GN=yjcK PE=3 SV=1	N-acetyltransferase [Bacillus pumilus] AKU32990.1 alanine acetyltransferase [Bacillus pumilus] AMB90391.1 alanine acetyltransferase [Bacillus pumilus]
gene1422	12.1564	24.3128	0	0	-Inf	1	1	gi|111111112|ref|scaffold2.1|	397784	398809	+	1025	gene1422	GO:0044249;GO:1901576;GO:0044710;GO:0071704;GO:0009987;GO:0009058;GO:0008152;GO:0055114;GO:0044237;GO:0044281;GO:0006629;GO:0006721;GO:0006720;GO:0044255;GO:0008610;GO:0044238;GO:0008299;GO:0016114;GO:0019752;GO:0019288;GO:0046490;GO:0006090;GO:0019682;GO:0006796;GO:0006644;GO:0009240;GO:0032787;GO:0043436;GO:0090407;GO:0006081;GO:0006082;GO:0008654;GO:1901135;GO:0006793;GO:0019637;GO:0016491;GO:…	K03526	ENOG4105C4E	I	sp|A8FF87|ISPG_BACP2|4-hydroxy-3-methylbut-2-en-1-yl diphosphate synthase (flavodoxin) OS=Bacillus pumilus (strain SAFR-032) OX=315750 GN=ispG PE=3 SV=1	4-hydroxy-3-methylbut-2-en-1-yl diphosphate synthase [Bacillus pumilus]
gene1423	0.0754016	0.150803	0	0	-Inf	1	1	gi|111111112|ref|scaffold2.1|	398858	399286	-	428	gene1423	-	-	ENOG4106EDZ	S	sp|P54481|YQFX_BACSU|Uncharacterized protein YqfX OS=Bacillus subtilis (strain 168) OX=224308 GN=yqfX PE=4 SV=1	protein yqfx [Bacillus stratosphericus LAMA 585]
gene1424	0.16337	0.32674	0	0	-Inf	1	1	gi|111111112|ref|scaffold2.1|	399345	399938	+	593	gene1424	GO:0016311;GO:0009987;GO:0044237;GO:0006796;GO:0008152;GO:0006793;GO:0042578;GO:0003824;GO:0016791;GO:0016788;GO:0016787	K05967	ENOG4108U5J	S	sp|P54480|YQFW_BACSU|Putative nucleotidase YqfW OS=Bacillus subtilis (strain 168) OX=224308 GN=yqfW PE=3 SV=1	nucleotidase [Bacillus stratosphericus LAMA 585]
gene1425	0.251339	0.502678	0	0	-Inf	1	1	gi|111111112|ref|scaffold2.1|	399961	400824	-	863	gene1425	GO:0008152;GO:0016310;GO:0009987;GO:0044237;GO:0006796;GO:0006793;GO:0051156;GO:0071704;GO:0044238;GO:0005975;GO:0044262;GO:0046835;GO:1901135;GO:0019637;GO:0016301;GO:0016740;GO:0003824;GO:0016772;GO:0016773;GO:0019200;GO:0004396;GO:0004340	K18673	ENOG41066F8	K	sp|Q8Y3R9|BGLK_LISMO|Beta-glucoside kinase OS=Listeria monocytogenes serovar 1/2a (strain ATCC BAA-679 / EGD-e) OX=169963 GN=bglK PE=1 SV=1	ROK family protein [Bacillus pumilus]
gene1426	0.0335118	0.0670237	0	0	-Inf	1	1	gi|111111112|ref|scaffold2.1|	401020	401379	-	359	gene1426	GO:0080090;GO:0019222;GO:0031326;GO:0031323;GO:0050789;GO:2000112;GO:0060255;GO:0065007;GO:0010468;GO:0019219;GO:0009889;GO:0050794;GO:0051171;GO:2001141;GO:0051252;GO:0006355;GO:0010556;GO:0003700;GO:0001071;GO:0097159;GO:0005488;GO:0003676;GO:0003677;GO:1901363	K02076	ENOG4105N80	K	sp|P54479|ZUR_BACSU|Zinc-specific metallo-regulatory protein OS=Bacillus subtilis (strain 168) OX=224308 GN=zur PE=1 SV=2	fur family transcriptional regulator [Bacillus stratosphericus LAMA 585]
gene1427	0.511056	1.02211	0	0	-Inf	1	1	gi|111111112|ref|scaffold2.1|	401426	402286	-	860	gene1427	GO:0006810;GO:0051234;GO:0051179;GO:0044763;GO:0044699;GO:0009987;GO:0055085;GO:0044765;GO:0046434;GO:0009166;GO:0009167;GO:0009164;GO:0044281;GO:0009161;GO:0046130;GO:1901360;GO:0009169;GO:0044710;GO:0009199;GO:0042454;GO:0009207;GO:0009205;GO:0009203;GO:0046034;GO:0046128;GO:0046483;GO:1901564;GO:1901565;GO:0034641;GO:0006163;GO:0019637;GO:0009141;GO:0009143;GO:0009144;GO:0009146;GO:0006807;GO:…	K09816	ENOG4105FAV	P	sp|O83079|Y036_TREPA|Probable metal transport system membrane protein TP_0036 OS=Treponema pallidum (strain Nichols) OX=243276 GN=TP_0036 PE=3 SV=1	metal ABC transporter permease [Bacillus zhangzhouensis] KEP27077.1 metal ABC transporter permease [Bacillus zhangzhouensis]
gene1428	0.502678	1.00536	0	0	-Inf	1	1	gi|111111112|ref|scaffold2.1|	402286	403164	-	878	gene1428	GO:0006200;GO:0009987;GO:0046434;GO:0009166;GO:0009167;GO:0044281;GO:0009161;GO:0046130;GO:1901360;GO:0009169;GO:0044710;GO:0009199;GO:0042454;GO:0009207;GO:0009205;GO:0009203;GO:0046034;GO:0046128;GO:0046483;GO:0009164;GO:1901564;GO:1901565;GO:0034641;GO:0006163;GO:0019637;GO:0009141;GO:0009143;GO:0009144;GO:0009146;GO:0006807;GO:0006195;GO:1901575;GO:1901361;GO:0009150;GO:0009154;GO:0009158;GO:…	K09817	ENOG4105FDK	P	sp|Q926D8|ZURA_LISIN|Zinc uptake system ATP-binding protein ZurA OS=Listeria innocua serovar 6a (strain ATCC BAA-680 / CLIP 11262) OX=272626 GN=zurA PE=3 SV=1	cation abc atp-binding protein [Bacillus stratosphericus LAMA 585]
gene1429	1.28602	2.57203	0	0	-Inf	1	1	gi|111111112|ref|scaffold2.1|	403199	404080	-	881	gene1429	-	-	ENOG4108JYZ	S	sp|P54478|YQFU_BACSU|UPF0750 membrane protein YqfU OS=Bacillus subtilis (strain 168) OX=224308 GN=yqfU PE=3 SV=2	YitT family protein [Bacillus australimaris] KPN15639.1 hypothetical protein AKG37_02110 [Bacillus australimaris]
gene143	0.423087	0.846174	0	0	-Inf	1	1	gi|111111111|ref|scaffold1.1|	136977	138842	+	1865	gene143	GO:0008152;GO:0090304;GO:0034641;GO:0006807;GO:1901360;GO:0006139;GO:0044260;GO:0071704;GO:0009987;GO:0006725;GO:0046483;GO:0044238;GO:0044237;GO:0043170;GO:0006259;GO:0044249;GO:0034645;GO:0006260;GO:0006261;GO:1901576;GO:0009058;GO:0009059;GO:0032774;GO:1901362;GO:0006269;GO:0018130;GO:0034654;GO:0016070;GO:0044271;GO:0019438;GO:0006266;GO:0044763;GO:0044699;GO:0051716;GO:0006281;GO:0006974;GO:…	K01971	ENOG4105DQE	L	sp|O34398|LIGD_BACSU|Bifunctional non-homologous end joining protein LigD OS=Bacillus subtilis (strain 168) OX=224308 GN=ligd PE=2 SV=1	ATP-dependent DNA ligase [Bacillus pumilus] ALM29221.1 ATP-dependent DNA ligase [Bacillus pumilus] ALM45759.1 ATP-dependent DNA ligase [Bacillus pumilus] ANY97239.1 ATP-dependent DNA ligase [Bacillus pumilus]
gene1430	0.347685	0.695371	0	0	-Inf	1	1	gi|111111112|ref|scaffold2.1|	404215	404475	+	260	gene1430	-	-	ENOG41069ZM	S	sp|P54477|YQFT_BACSU|Uncharacterized protein YqfT OS=Bacillus subtilis (strain 168) OX=224308 GN=yqfT PE=4 SV=1	Protein of uncharacterised function (DUF2624) [Streptococcus pneumoniae] SCC30794.1 Protein of unknown function [Bacillus sp. nio-1130]
gene1432	13.7147	27.4294	0	0	-Inf	1	1	gi|111111112|ref|scaffold2.1|	405428	406747	-	1319	gene1432	GO:0009987;GO:0008152;GO:1901360;GO:0046483;GO:0034641;GO:0006807;GO:0006139;GO:0006725;GO:0071704;GO:0044238;GO:0044237;GO:1901575;GO:1901361;GO:0046700;GO:0019439;GO:0034655;GO:0044270;GO:0044248;GO:0009056;GO:0046434;GO:0009166;GO:0009167;GO:0009164;GO:0006200;GO:0009161;GO:0046130;GO:0009169;GO:0044710;GO:0009199;GO:0042454;GO:0009207;GO:0009205;GO:0009203;GO:0046034;GO:0046128;GO:1901564;GO:…	K18692	ENOG4105C1J	L	sp|P54475|CSHB_BACSU|DEAD-box ATP-dependent RNA helicase CshB OS=Bacillus subtilis (strain 168) OX=224308 GN=cshB PE=1 SV=1	ATP-dependent helicase [Bacillus sp. UNC125MFCrub1.1]
gene1434	0.0167559	0.0335118	0	0	-Inf	1	1	gi|111111112|ref|scaffold2.1|	406921	407616	+	695	gene1434	-	-	ENOG41069QB	S	sp|P54474|YQFQ_BACSU|Uncharacterized protein YqfQ OS=Bacillus subtilis (strain 168) OX=224308 GN=yqfQ PE=4 SV=1	spore coat protein [Bacillus aerophilus]
gene1435	4.00048	8.00095	0	0	-Inf	1	1	gi|111111112|ref|scaffold2.1|	407773	408717	+	944	gene1435	GO:0019752;GO:0044249;GO:0019288;GO:0046490;GO:0044281;GO:0006090;GO:1901576;GO:0044710;GO:0019682;GO:0006796;GO:0071704;GO:0006644;GO:0009987;GO:0006629;GO:0006720;GO:0009240;GO:0032787;GO:0009058;GO:0008152;GO:0043436;GO:0044255;GO:0090407;GO:0055114;GO:0008610;GO:0044238;GO:0006081;GO:0006082;GO:0008654;GO:0044237;GO:0008299;GO:0006793;GO:0019637;GO:1901135;GO:0006721;GO:0050993;GO:0050992;GO:…	K03527	ENOG4108IUH	I	sp|A8FFA1|ISPH_BACP2|4-hydroxy-3-methylbut-2-enyl diphosphate reductase OS=Bacillus pumilus (strain SAFR-032) OX=315750 GN=ispH PE=3 SV=1	4-hydroxy-3-methylbut-2-enyl diphosphate reductase [Bacillus pumilus] ALM28632.1 4-hydroxy-3-methylbut-2-enyl diphosphate reductase [Bacillus pumilus] ALM45171.1 4-hydroxy-3-methylbut-2-enyl diphosphate reductase [Bacillus pumilus] ANY96650.1 4-hydroxy-3-methylbut-2-enyl diphosphate reductase [Bacillus pumilus]
gene1436	1.48709	2.97418	0	0	-Inf	1	1	gi|111111112|ref|scaffold2.1|	408754	409746	-	992	gene1436	-	-	ENOG4105EGD	S	sp|P54472|GCH1L_BACSU|GTP cyclohydrolase 1 type 2 homolog OS=Bacillus subtilis (strain 168) OX=224308 GN=yqfO PE=3 SV=2	Nif3-like dinuclear metal center hexameric protein [Bacillus stratosphericus] KOA79385.1 hypothetical protein ACR53_08195 [Bacillus stratosphericus]
gene1437	0.402142	0.804284	0	0	-Inf	1	1	gi|111111112|ref|scaffold2.1|	409868	410584	-	716	gene1437	GO:0009451;GO:0090304;GO:0034641;GO:0006807;GO:0034660;GO:1901360;GO:0034470;GO:0006139;GO:0044260;GO:0071704;GO:0010467;GO:0006400;GO:0032259;GO:0008033;GO:0030488;GO:0009987;GO:0006725;GO:0043412;GO:0043414;GO:0008152;GO:0001510;GO:0046483;GO:0016070;GO:0044238;GO:0044237;GO:0043170;GO:0006399;GO:0006396;GO:0016429;GO:0008173;GO:0008757;GO:0016741;GO:0003824;GO:0016740;GO:0016426;GO:0008175;GO:…	K06967	ENOG4108V39	S	sp|P54471|TRMK_BACSU|tRNA (adenine(22)-N(1))-methyltransferase OS=Bacillus subtilis (strain 168) OX=224308 GN=trmK PE=1 SV=2	SAM-dependent methyltransferase [Bacillus pumilus]
gene1438	0.175937	0.351874	0	0	-Inf	1	1	gi|111111112|ref|scaffold2.1|	410705	411073	-	368	gene1438	GO:0043169;GO:0046914;GO:0020037;GO:0046906;GO:0097159;GO:0043167;GO:0005488;GO:0005506;GO:0046872;GO:1901363;GO:0009055;GO:0044425;GO:0016021;GO:0016020;GO:0031224	K13300	ENOG4105JQE	C	sp|P24469|C550_BACSU|Cytochrome c-550 OS=Bacillus subtilis (strain 168) OX=224308 GN=cccA PE=1 SV=1	cytochrome c550 [Bacillus stratosphericus LAMA 585]
gene144	0.0754016	0.150803	0	0	-Inf	1	1	gi|111111111|ref|scaffold1.1|	138994	139572	+	578	gene144	-	-	ENOG4105ZKJ	S	sp|O34343|YOAK_BACSU|UPF0700 transmembrane protein YoaK OS=Bacillus subtilis (strain 168) OX=224308 GN=yoaK PE=3 SV=1	hypothetical protein [Bacillus stratosphericus] OQP18678.1 hypothetical protein B2I20_18380 [Bacillus stratosphericus]
gene1441	0.808473	1.61695	0	0	-Inf	1	1	gi|111111112|ref|scaffold2.1|	414554	414727	-	173	gene1441	-	K09768	ENOG4108UPT	S	sp|A8FFA7|Y2255_BACP2|UPF0178 protein BPUM_2255 OS=Bacillus pumilus (strain SAFR-032) OX=315750 GN=BPUM_2255 PE=3 SV=1	hypothetical protein [Bacillus sp. RRD69] SIT91171.1 hypothetical protein SAMN05216491_2534 [Bacillus sp. RRD69]
gene1442	2.09449	4.18898	0	0	-Inf	1	1	gi|111111112|ref|scaffold2.1|	415316	416137	-	821	gene1442	GO:0008152;GO:0016310;GO:0044267;GO:0044260;GO:0071704;GO:0006468;GO:0009987;GO:0006464;GO:0043412;GO:0036211;GO:0044238;GO:0019538;GO:0044237;GO:0043170;GO:0006796;GO:0006793;GO:0035639;GO:0005488;GO:0000166;GO:1901363;GO:0001883;GO:0001882;GO:0043168;GO:0043167;GO:0016740;GO:1901265;GO:0032549;GO:0017076;GO:0005524;GO:0036094;GO:0003824;GO:0030554;GO:0016772;GO:0032559;GO:0097159;GO:0032555;GO:…	K09773	ENOG4105CF9	S	sp|P54470|PDRP_BACSU|Putative pyruvate, phosphate dikinase regulatory protein OS=Bacillus subtilis (strain 168) OX=224308 GN=yqfL PE=1 SV=1	pep synthetase regulatory protein [Bacillus stratosphericus LAMA 585]
gene1443	0.385386	0.770772	0	0	-Inf	1	1	gi|111111112|ref|scaffold2.1|	416163	416858	-	695	gene1443	GO:0080090;GO:0019222;GO:0031326;GO:0031323;GO:0050789;GO:2000112;GO:0060255;GO:0065007;GO:0010468;GO:0019219;GO:0009889;GO:0050794;GO:0051171;GO:2001141;GO:0051252;GO:0006355;GO:0010556;GO:0003700;GO:0001071;GO:0044464;GO:0005623;GO:0005622	K23774	ENOG41064Q9	K	sp|O34994|CCPN_BACSU|Transcriptional repressor CcpN OS=Bacillus subtilis (strain 168) OX=224308 GN=ccpN PE=1 SV=1	transcriptional repressor [Bacillus stratosphericus LAMA 585] CVM18192.1 DNA-binding protein [Streptococcus pneumoniae] SCC36422.1 CBS domain-containing protein [Bacillus sp. nio-1130] SFX94624.1 CBS domain-containing protein [Bacillus sp. ru9509.4] SIT91177.1 CBS domain-containing protein [Bacillus sp. RRD69]
gene1445	1.3321	2.66419	0	0	-Inf	1	1	gi|111111112|ref|scaffold2.1|	419006	419908	-	902	gene1445	GO:0019752;GO:0090304;GO:0044249;GO:0034641;GO:0006807;GO:0044281;GO:0034645;GO:0034660;GO:1901360;GO:0006139;GO:0044710;GO:0044260;GO:0006520;GO:0071704;GO:0010467;GO:0006426;GO:0044267;GO:0009987;GO:0006725;GO:0009058;GO:0009059;GO:0008152;GO:0043436;GO:0046483;GO:0016070;GO:0044238;GO:1901564;GO:0006082;GO:0019538;GO:0044237;GO:0043170;GO:0006399;GO:0043038;GO:0043039;GO:0006418;GO:1901576;GO:…	K01878	ENOG4108HMW	J	sp|A8FFB1|SYGA_BACP2|Glycine--tRNA ligase alpha subunit OS=Bacillus pumilus (strain SAFR-032) OX=315750 GN=glyQ PE=3 SV=1	glycyl-trna synthetase subunit alpha [Bacillus stratosphericus LAMA 585]
gene1446	1.23575	2.4715	0	0	-Inf	1	1	gi|111111112|ref|scaffold2.1|	420223	420993	-	770	gene1446	GO:0090304;GO:0034641;GO:0006807;GO:0044699;GO:0006139;GO:0051716;GO:0044260;GO:0071704;GO:1901360;GO:0006281;GO:0009987;GO:0006725;GO:0006974;GO:0006950;GO:0044763;GO:0008152;GO:0046483;GO:0006310;GO:0044238;GO:0050896;GO:0044237;GO:0043170;GO:0033554;GO:0006259	K03584	ENOG4108SAY	L	sp|A8FFB2|RECO_BACP2|DNA repair protein RecO OS=Bacillus pumilus (strain SAFR-032) OX=315750 GN=recO PE=3 SV=1	DNA repair protein RecO [Bacillus pumilus] AMB90416.1 DNA repair protein RecO [Bacillus pumilus]
gene1447	0.883875	1.76775	0	0	-Inf	1	1	gi|111111112|ref|scaffold2.1|	421029	421220	-	191	gene1447	-	-	ENOG41079VA	S	sp|C0H452|YQZL_BACSU|Uncharacterized protein YqzL OS=Bacillus subtilis (strain 168) OX=224308 GN=yqzL PE=4 SV=1	hypothetical protein BPUM_2261 [Bacillus pumilus SAFR-032] KWV61275.1 hypothetical protein DJ67_18910 [Bacillus pumilus]
gene1448	9.12779	18.2556	0	0	-Inf	1	1	gi|111111112|ref|scaffold2.1|	421320	422120	-	800	gene1448	GO:0006184;GO:0042254;GO:0071840;GO:0022613;GO:0044085;GO:0009987;GO:0046483;GO:0006807;GO:1901360;GO:0008152;GO:0034641;GO:0006139;GO:0006725;GO:0071704;GO:0044238;GO:0044237;GO:1901361;GO:1901575;GO:0046700;GO:0019439;GO:0034655;GO:0044270;GO:0044248;GO:0009056;GO:0046434;GO:0009166;GO:0009164;GO:0046130;GO:0009199;GO:0042454;GO:0009207;GO:0009205;GO:0046039;GO:0046128;GO:1901564;GO:1901565;GO:…	K03595	ENOG4105CWT	M	sp|P42182|ERA_BACSU|GTPase Era OS=Bacillus subtilis (strain 168) OX=224308 GN=era PE=1 SV=1	GTPase Era [Bacillus safensis] KKD43141.1 GTPase Era [Bacillus safensis]
gene1449	9.62628	19.2526	0	0	-Inf	1	1	gi|111111112|ref|scaffold2.1|	422218	422616	-	398	gene1449	GO:0008152;GO:0009972;GO:0072527;GO:0044248;GO:0006213;GO:0034641;GO:0006807;GO:0044281;GO:0046135;GO:0046131;GO:1901360;GO:0046087;GO:0006139;GO:0044710;GO:0046483;GO:0071704;GO:0046133;GO:1901361;GO:0009987;GO:0006725;GO:1901575;GO:0046700;GO:0009116;GO:0034655;GO:0009119;GO:0009056;GO:0055086;GO:0042454;GO:0044238;GO:1901564;GO:0044270;GO:0072529;GO:1901136;GO:1901135;GO:0006216;GO:0009164;GO:…	K01489	ENOG4105KG3	F	sp|P19079|CDD_BACSU|Cytidine deaminase OS=Bacillus subtilis (strain 168) OX=224308 GN=cdd PE=1 SV=1	cytidine deaminase [Bacillus stratosphericus LAMA 585]
gene145	0.0209449	0.0418898	0	0	-Inf	1	1	gi|111111111|ref|scaffold1.1|	139612	139863	-	251	gene145	-	-	-	-	-	hypothetical protein [Bacillus stratosphericus]
gene1450	0.423087	0.846174	0	0	-Inf	1	1	gi|111111112|ref|scaffold2.1|	422729	422932	-	203	gene1450	GO:0016310;GO:0044249;GO:0044710;GO:0071704;GO:0006644;GO:0006629;GO:1901576;GO:0009987;GO:0009058;GO:0008152;GO:0044255;GO:0090407;GO:0008610;GO:0044238;GO:0008654;GO:0044237;GO:0006796;GO:0006793;GO:0019637;GO:0016740;GO:0004143;GO:0016301;GO:0003824;GO:0016772;GO:0016773;GO:0016020	K00887	ENOG4107YR5	M	sp|P19638|UDPK_BACSU|Undecaprenol kinase OS=Bacillus subtilis (strain 168) OX=224308 GN=dgkA PE=1 SV=4	diacylglycerol kinase [Bacillus pumilus] AMB90419.1 diacylglycerol kinase [Bacillus pumilus]
gene1451	1.03049	2.06098	0	0	-Inf	1	1	gi|111111112|ref|scaffold2.1|	423093	423572	-	479	gene1451	GO:0090305;GO:0090304;GO:0034641;GO:0006807;GO:0034660;GO:0071840;GO:0006139;GO:0044260;GO:1901360;GO:0042254;GO:0071704;GO:0010467;GO:0006364;GO:0022613;GO:0034470;GO:0009987;GO:0006725;GO:0008152;GO:0046483;GO:0016070;GO:0044238;GO:0016072;GO:0044237;GO:0043170;GO:0044085;GO:0006396;GO:0019538;GO:0006508;GO:0004175;GO:0005488;GO:0008233;GO:0008237;GO:0043169;GO:0046914;GO:0043167;GO:0046872;GO:…	K07042	ENOG4105KGE	F	sp|A8FFB6|YBEY_BACP2|Endoribonuclease YbeY OS=Bacillus pumilus (strain SAFR-032) OX=315750 GN=ybeY PE=3 SV=1	endoribonuclease YbeY [Bacillus pumilus] KIL28629.1 hypothetical protein B4133_2459 [Bacillus pumilus]
gene1452	6.46779	12.9356	0	0	-Inf	1	1	gi|111111112|ref|scaffold2.1|	423573	425663	-	2090	gene1452	GO:0008152;GO:0016787;GO:0008081;GO:0043169;GO:0016788;GO:0043167;GO:0042578;GO:0003824;GO:0005488;GO:0046872	K07037	ENOG4105CTJ	S	sp|P46344|PGPH_BACSU|Cyclic-di-AMP phosphodiesterase PgpH OS=Bacillus subtilis (strain 168) OX=224308 GN=pgpH PE=3 SV=2	hypothetical protein [Bacillus sp. RRD69] SIT91205.1 hypothetical protein SAMN05216491_2545 [Bacillus sp. RRD69]
gene1453	2.128	4.256	0	0	-Inf	1	1	gi|111111112|ref|scaffold2.1|	425802	426761	-	959	gene1453	GO:0035639;GO:0005488;GO:0000166;GO:1901363;GO:1901265;GO:0001882;GO:0043168;GO:0043167;GO:0001883;GO:0032549;GO:0017076;GO:0005524;GO:0036094;GO:0030554;GO:0097159;GO:0032559;GO:0032555;GO:0032550;GO:0032553;GO:0003676;GO:0003723	K06217	ENOG4105C9A	T	sp|P46343|PHOL_BACSU|PhoH-like protein OS=Bacillus subtilis (strain 168) OX=224308 GN=phoH PE=3 SV=3	PhoH family protein [Bacillus stratosphericus] EMI12315.1 hypothetical protein C883_2756 [Bacillus stratosphericus LAMA 585]
gene1454	0.0251339	0.0502678	0	0	-Inf	1	1	gi|111111112|ref|scaffold2.1|	426765	427637	-	872	gene1454	-	K06438	ENOG41064TB	S	sp|P54469|YQFD_BACSU|Uncharacterized protein YqfD OS=Bacillus subtilis (strain 168) OX=224308 GN=yqfD PE=4 SV=2	stage IV sporulation protein [Bacillus pumilus] AHL72126.1 stage IV sporulation protein [Bacillus pumilus] AMB90423.1 stage IV sporulation protein [Bacillus pumilus]
gene1457	69.2271	138.454	0	0	-Inf	1	1	gi|111111112|ref|scaffold2.1|	428973	429965	-	992	gene1457	GO:0008152;GO:0006434;GO:0019752;GO:0090304;GO:0044249;GO:0034641;GO:0006807;GO:0044281;GO:0034645;GO:0034660;GO:1901360;GO:0006139;GO:0044710;GO:0044260;GO:0006520;GO:0071704;GO:0010467;GO:0044267;GO:0009987;GO:0006725;GO:0009058;GO:0009059;GO:0043436;GO:0046483;GO:0016070;GO:0044238;GO:1901564;GO:0006082;GO:0019538;GO:0044237;GO:0043170;GO:0006399;GO:0043038;GO:0043039;GO:0006418;GO:1901576;GO:…	-	ENOG4105DI5	S	sp|A8FFC3|Y2271_BACP2|UPF0365 protein BPUM_2271 OS=Bacillus pumilus (strain SAFR-032) OX=315750 GN=BPUM_2271 PE=3 SV=1	UPF0365 family protein [Bacillus pumilus] EDW20142.1 protein YqfA [Bacillus pumilus ATCC 7061] KMY21856.1 hypothetical protein TW93_03280 [Bacillus pumilus]
gene1459	6.41333	12.8267	0	0	-Inf	1	1	gi|111111112|ref|scaffold2.1|	431448	431897	-	449	gene1459	GO:0008152;GO:0016879;GO:0003824;GO:0016884;GO:0016874	K09117	ENOG4105KTH	S	sp|P54464|YQEY_BACSU|Uncharacterized protein YqeY OS=Bacillus subtilis (strain 168) OX=224308 GN=yqeY PE=1 SV=1	hypothetical protein [Bacillus xiamenensis] EKF36641.1 hypothetical protein BA1_04667 [Bacillus xiamenensis]
gene146	0.0502678	0.100536	0	0	-Inf	1	1	gi|111111111|ref|scaffold1.1|	140181	140294	-	113	gene146	-	-	-	-	-	hypothetical protein BAME_13600 [Bacillus sp. M 2-6]
gene1460	12.6926	25.3852	0	0	-Inf	1	1	gi|111111112|ref|scaffold2.1|	431912	432085	-	173	gene1460	GO:0071704;GO:0044238;GO:0034645;GO:0044260;GO:0044267;GO:0019538;GO:0009987;GO:0010467;GO:0044237;GO:0043170;GO:0044249;GO:0009058;GO:0009059;GO:0008152;GO:1901576;GO:0006412;GO:0003735;GO:0005198;GO:0005737;GO:0032991;GO:0005840;GO:0043232;GO:0044464;GO:0044444;GO:0005623;GO:0030529;GO:0043229;GO:0043228;GO:0044424;GO:0005622;GO:0043226	K02970	ENOG4105VCC	J	sp|A7Z6V5|RS21_BACVZ|30S ribosomal protein S21 OS=Bacillus velezensis (strain DSM 23117 / BGSC 10A6 / FZB42) OX=326423 GN=rpsU PE=3 SV=1	30S ribosomal protein S21 [Bacillus dielmoensis]
gene1461	0.209449	0.418898	0	0	-Inf	1	1	gi|111111112|ref|scaffold2.1|	432271	433197	+	926	gene1461	GO:0006810;GO:0055085;GO:0044341;GO:0006811;GO:0009987;GO:0006817;GO:0044765;GO:0051179;GO:0034220;GO:0006820;GO:0044763;GO:0015698;GO:0051234;GO:0035435;GO:0044699;GO:0022891;GO:0022892;GO:0005215;GO:0008509;GO:0015321;GO:0022857;GO:0015075;GO:0015114;GO:0015103;GO:0016020	K03324	ENOG4106W99	P	sp|P54463|YQEW_BACSU|Uncharacterized protein YqeW OS=Bacillus subtilis (strain 168) OX=224308 GN=yqeW PE=4 SV=2	hypothetical protein [Bacillus altitudinis] OPW99849.1 hypothetical protein BG911_09090 [Bacillus altitudinis]
gene1462	13.011	26.0219	0	0	-Inf	1	1	gi|111111112|ref|scaffold2.1|	433238	434596	-	1358	gene1462	GO:0008152;GO:0044260;GO:0071704;GO:0009987;GO:0043412;GO:0044238;GO:0044237;GO:0043170;GO:0009451;GO:0090304;GO:0034641;GO:0006807;GO:1901360;GO:0006139;GO:0006725;GO:0046483;GO:0016070;GO:0018198;GO:0018197;GO:0018193;GO:0018339;GO:0044267;GO:0006464;GO:0036211;GO:0019538;GO:0032259;GO:0003824;GO:0051536;GO:0005488;GO:0051540;GO:0051539;GO:0016740;GO:0046872;GO:0043169;GO:0043167;GO:0046914;GO:…	K18707	ENOG4105CBM	J	sp|P54462|MTAB_BACSU|Threonylcarbamoyladenosine tRNA methylthiotransferase MtaB OS=Bacillus subtilis (strain 168) OX=224308 GN=mtaB PE=1 SV=1	hypothetical protein B4133_2514 [Bacillus pumilus] BAT49421.1 putative uncharacterized protein MW1528 [Bacillus pumilus] SCC36120.1 threonylcarbamoyladenosine tRNA methylthiotransferase MtaB [Bacillus sp. nio-1130] SFX94122.1 threonylcarbamoyladenosine tRNA methylthiotransferase MtaB [Bacillus sp. ru9509.4]
gene1463	1.2148	2.42961	0	0	-Inf	1	1	gi|111111112|ref|scaffold2.1|	434596	435366	-	770	gene1463	GO:0032259;GO:0090304;GO:0034641;GO:0006807;GO:0034660;GO:0071840;GO:0006139;GO:0044260;GO:1901360;GO:0042254;GO:0071704;GO:0010467;GO:0006364;GO:0022613;GO:0034470;GO:0009987;GO:0006725;GO:0008152;GO:0046483;GO:0016070;GO:0044238;GO:0016072;GO:0044237;GO:0043170;GO:0044085;GO:0006396;GO:0008168;GO:0016740;GO:0016741;GO:0003824;GO:0005737;GO:0044464;GO:0005623;GO:0005622;GO:0044424	K09761	ENOG4105QF0	S	sp|P54461|RSME_BACSU|Ribosomal RNA small subunit methyltransferase E OS=Bacillus subtilis (strain 168) OX=224308 GN=rsmE PE=1 SV=1	16S rRNA (uracil(1498)-N(3))-methyltransferase [Bacillus pumilus] AKU33031.1 16S rRNA methyltransferase [Bacillus pumilus]
gene1464	2.90296	5.80593	0	0	-Inf	1	1	gi|111111112|ref|scaffold2.1|	435390	436103	-	713	gene1464	GO:0006479;GO:0008213;GO:0044267;GO:0044260;GO:0071704;GO:0032259;GO:0009987;GO:0006464;GO:0036211;GO:0043414;GO:0008152;GO:0044238;GO:0019538;GO:0043412;GO:0044237;GO:0043170;GO:0008168;GO:0016741;GO:0003824;GO:0016740;GO:0008276;GO:0005737;GO:0044464;GO:0005623;GO:0005622;GO:0044424;GO:0032991;GO:0005840;GO:0043232;GO:0044444;GO:0043229;GO:0043228;GO:0030529;GO:0043226	K02687	ENOG4105F59	J	sp|A8FFD0|PRMA_BACP2|Ribosomal protein L11 methyltransferase OS=Bacillus pumilus (strain SAFR-032) OX=315750 GN=prmA PE=3 SV=1	ribosomal protein l11 methyltransferase [Bacillus stratosphericus LAMA 585]
gene1465	3.18362	6.36725	0	0	-Inf	1	1	gi|111111112|ref|scaffold2.1|	436348	437481	-	1133	gene1465	GO:0006950;GO:0044260;GO:0071704;GO:0009987;GO:0008152;GO:0044238;GO:0044237;GO:0043170;GO:0006457;GO:0044267;GO:0019538;GO:0050896;GO:0090304;GO:0044249;GO:0034641;GO:0006807;GO:0034645;GO:1901576;GO:1901360;GO:0006139;GO:0006260;GO:0006725;GO:0009058;GO:0009059;GO:0046483;GO:0006259;GO:0009628;GO:0009266;GO:0009408;GO:0046872;GO:0005488;GO:0043167;GO:0043169;GO:0035639;GO:1901363;GO:1901265;GO:…	K03686	ENOG4105BZ5	O	sp|A8FFD1|DNAJ_BACP2|Chaperone protein DnaJ OS=Bacillus pumilus (strain SAFR-032) OX=315750 GN=dnaJ PE=3 SV=1	molecular chaperone DnaJ [Bacillus pumilus] BAT49424.1 molecular chaperone DnaJ [Bacillus pumilus] APP16431.1 molecular chaperone DnaJ [Bacillus pumilus]
gene1467	3.28416	6.56832	0	0	-Inf	1	1	gi|111111112|ref|scaffold2.1|	439510	440067	-	557	gene1467	GO:0044238;GO:0044260;GO:0044267;GO:0019538;GO:0050896;GO:0009987;GO:0044237;GO:0043170;GO:0071704;GO:0006950;GO:0008152;GO:0050790;GO:0006457;GO:0019222;GO:0065007;GO:0065009;GO:0050789;GO:0030554;GO:0060589;GO:0030234;GO:0000166;GO:0036094;GO:0005488;GO:0060590;GO:0097159;GO:0017076;GO:0000774;GO:1901363;GO:1901265;GO:0005737;GO:0044424;GO:0044464;GO:0005623;GO:0005622	K03687	ENOG4105K90	O	sp|A8FFD3|GRPE_BACP2|Protein GrpE OS=Bacillus pumilus (strain SAFR-032) OX=315750 GN=grpE PE=3 SV=1	nucleotide exchange factor GrpE [Bacillus stratosphericus] KML00327.1 heat shock protein GrpE [Bacillus stratosphericus] KML52612.1 heat shock protein GrpE [Bacillus stratosphericus]
gene1468	8.87645	17.7529	0	0	-Inf	1	1	gi|111111112|ref|scaffold2.1|	440131	441168	-	1037	gene1468	GO:0019222;GO:0031326;GO:0031323;GO:0050789;GO:0080090;GO:2000112;GO:0060255;GO:0065007;GO:0010468;GO:0019219;GO:0009889;GO:0050794;GO:0051171;GO:2001141;GO:0051252;GO:0006355;GO:0010556;GO:0050896;GO:0006950;GO:0032774;GO:0090304;GO:0044249;GO:0034641;GO:0006807;GO:0034645;GO:1901362;GO:1901360;GO:0006139;GO:0044260;GO:0071704;GO:0010467;GO:0018130;GO:1901576;GO:0006725;GO:0009987;GO:0009058;GO:…	K03705	ENOG4105CI8	K	sp|A8FFD4|HRCA_BACP2|Heat-inducible transcription repressor HrcA OS=Bacillus pumilus (strain SAFR-032) OX=315750 GN=hrcA PE=3 SV=1	heat-inducible transcription repressor [Bacillus stratosphericus LAMA 585]
gene1469	3.89156	7.78312	0	0	-Inf	1	1	gi|111111112|ref|scaffold2.1|	441244	442383	-	1139	gene1469	GO:0008152;GO:0044710;GO:0055114;GO:0006779;GO:0006778;GO:0044249;GO:0034641;GO:0006807;GO:1901362;GO:1901360;GO:1901576;GO:0051186;GO:0051188;GO:0071704;GO:0033014;GO:0033013;GO:0018130;GO:0009987;GO:0006725;GO:0009058;GO:1901564;GO:0046483;GO:0044271;GO:1901566;GO:0044237;GO:0019438;GO:0051536;GO:0003824;GO:0051540;GO:0005488;GO:0016491;GO:0016627;GO:0016634;GO:0004109;GO:0051989;GO:0005737;GO:…	K02495	ENOG4105CSA	H	sp|P54304|YQER_BACSU|Oxygen-independent coproporphyrinogen-III oxidase-like protein YqeR OS=Bacillus subtilis (strain 168) OX=224308 GN=hemN PE=2 SV=3	coproporphyrinogen III oxidase [Bacillus pumilus] ALM28599.1 coproporphyrinogen III oxidase [Bacillus pumilus] ALM45138.1 coproporphyrinogen III oxidase [Bacillus pumilus] ANY96617.1 coproporphyrinogen III oxidase [Bacillus pumilus]
gene147	7.36004	14.7201	0	0	-Inf	1	1	gi|111111111|ref|scaffold1.1|	140296	141408	-	1112	gene147	GO:0008152;GO:0044238;GO:0006468;GO:0044260;GO:0044267;GO:0019538;GO:0016310;GO:0009987;GO:0043412;GO:0006464;GO:0043170;GO:0071704;GO:0006796;GO:0036211;GO:0044237;GO:0006793;GO:0003824;GO:0016787;GO:0004674;GO:0016773;GO:0016772;GO:0016301;GO:0016740;GO:0004672	K06369	ENOG4107P3N	T	sp|O34930|RAPK_BACSU|Response regulator aspartate phosphatase K OS=Bacillus subtilis (strain 168) OX=224308 GN=rapK PE=3 SV=1	tetratricopeptide repeat protein [Bacillus stratosphericus] KOA73273.1 aspartate phosphatase [Bacillus stratosphericus]
gene1470	12.1774	24.3547	0	0	-Inf	1	1	gi|111111112|ref|scaffold2.1|	442498	444201	-	1703	gene1470	GO:0006184;GO:0006414;GO:0006412;GO:0046434;GO:0009166;GO:0009164;GO:0044281;GO:0046130;GO:1901360;GO:0044710;GO:0009199;GO:0046483;GO:0009207;GO:0009205;GO:0046039;GO:0046128;GO:0042454;GO:1901564;GO:1901565;GO:0006163;GO:0019637;GO:0009141;GO:0009143;GO:0009144;GO:0009146;GO:0006807;GO:0006195;GO:1901575;GO:1901069;GO:1901068;GO:0009154;GO:0046700;GO:0009261;GO:0019439;GO:0008152;GO:0034655;GO:…	K03596	ENOG4105C4S	M	sp|A8FFD6|LEPA_BACP2|Elongation factor 4 OS=Bacillus pumilus (strain SAFR-032) OX=315750 GN=lepA PE=3 SV=1	gtp-binding protein [Bacillus stratosphericus LAMA 585]
gene1471	0.0125669	0.0251339	0	0	-Inf	1	1	gi|111111112|ref|scaffold2.1|	444502	444834	-	332	gene1471	-	-	ENOG4106Y8K	S	sp|P38425|YQXA_BACSU|Uncharacterized protein YqxA OS=Bacillus subtilis (strain 168) OX=224308 GN=yqxA PE=4 SV=1	protein yqxa [Bacillus stratosphericus LAMA 585]
gene1472	0.0418898	0.0837796	0	0	-Inf	1	1	gi|111111112|ref|scaffold2.1|	444848	446056	-	1208	gene1472	-	K06385	ENOG4108ZRV	S	sp|P37968|SP2P_BACSU|Stage II sporulation protein P OS=Bacillus subtilis (strain 168) OX=224308 GN=spoIIP PE=4 SV=1	stage II sporulation protein P [Bacillus pumilus] AHL72144.1 stage II sporulation protein P [Bacillus pumilus]
gene1473	0.0628347	0.125669	0	0	-Inf	1	1	gi|111111112|ref|scaffold2.1|	446123	447238	-	1115	gene1473	GO:0032502;GO:0008152;GO:0044238;GO:0019538;GO:0043170;GO:0071704;GO:0009847;GO:0006508;GO:0016787;GO:0003824;GO:0008233;GO:0004175;GO:0004222;GO:0070011;GO:0008237	K06012	ENOG4105CEF	O	sp|A8FFD9|GPR_BACP2|Germination protease OS=Bacillus pumilus (strain SAFR-032) OX=315750 GN=gpr PE=3 SV=1	GPR endopeptidase [Bacillus stratosphericus] EMI12333.1 germination protease [Bacillus stratosphericus LAMA 585]
gene1474	8.03027	16.0605	0	0	-Inf	1	1	gi|111111112|ref|scaffold2.1|	447437	447703	+	266	gene1474	GO:0044249;GO:0034645;GO:0044267;GO:0044260;GO:0071704;GO:0010467;GO:0009987;GO:1901576;GO:0009058;GO:0009059;GO:0008152;GO:0044238;GO:0019538;GO:0044237;GO:0043170;GO:0006412;GO:0003723;GO:0097159;GO:0005488;GO:0003676;GO:1901363;GO:0003735;GO:0005198;GO:0019843;GO:0005737;GO:0044464;GO:0044444;GO:0005623;GO:0044424;GO:0005622;GO:0032991;GO:0005840;GO:0043232;GO:0030529;GO:0043229;GO:0043228;GO:…	K02968	ENOG4105KQV	J	sp|A8FFE0|RS20_BACP2|30S ribosomal protein S20 OS=Bacillus pumilus (strain SAFR-032) OX=315750 GN=rpsT PE=3 SV=1	30S ribosomal protein S20 [Bacillus australimaris] KPN15681.1 30S ribosomal protein S20 [Bacillus australimaris]
gene1475	0.418898	0.837796	0	0	-Inf	1	1	gi|111111112|ref|scaffold2.1|	447838	448857	-	1019	gene1475	GO:0071704;GO:0006139;GO:0034645;GO:0044260;GO:0044238;GO:0009987;GO:0006725;GO:0034641;GO:0009059;GO:0043170;GO:0090304;GO:0044249;GO:0009058;GO:0006807;GO:0006260;GO:0044237;GO:0008152;GO:0006259;GO:1901576;GO:1901360;GO:0046483;GO:0005488;GO:0003676;GO:0003677;GO:0097159;GO:1901363;GO:0016779;GO:0016772;GO:0034061;GO:0003887;GO:0003824;GO:0016740;GO:0043234;GO:0032991;GO:0044464;GO:0005623;GO:…	K02340	ENOG4105TQK	L	sp|P54459|YQEN_BACSU|Uncharacterized protein YqeN OS=Bacillus subtilis (strain 168) OX=224308 GN=yqeN PE=1 SV=1	DNA polymerase III subunit delta [Streptococcus pneumoniae]
gene1476	0.0544567	0.108913	0	0	-Inf	1	1	gi|111111112|ref|scaffold2.1|	449090	449230	+	140	gene1476	-	-	ENOG4106BBT	S	sp|C0H453|YQZM_BACSU|Uncharacterized membrane protein YqzM OS=Bacillus subtilis (strain 168) OX=224308 GN=yqzM PE=4 SV=1	hypothetical protein MY7_2321 [Bacillus sp. 5B6]
gene1477	0.733072	1.46614	0	0	-Inf	1	1	gi|111111112|ref|scaffold2.1|	449270	451453	-	2183	gene1477	GO:0008152;GO:0009991;GO:0030420;GO:0051716;GO:0009605;GO:0050896;GO:0009987;GO:0031668;GO:0071496;GO:0044764;GO:0044763;GO:0007154;GO:0009292;GO:0009294;GO:0044699;GO:0051704;GO:0003824;GO:0016787;GO:0016020;GO:0016021;GO:0044425;GO:0031224	K02238	ENOG4105EGY	S	sp|P39695|COMEC_BACSU|ComE operon protein 3 OS=Bacillus subtilis (strain 168) OX=224308 GN=comEC PE=2 SV=2	DNA internalization-related competence protein ComEC/Rec2 [Bacillus stratosphericus] KML00337.1 competence protein ComEC [Bacillus stratosphericus] KML52602.1 competence protein ComEC [Bacillus stratosphericus]
gene1478	0.565512	1.13102	0	0	-Inf	1	1	gi|111111112|ref|scaffold2.1|	451590	452129	-	539	gene1478	GO:0008152;GO:0005488;GO:0043167;GO:0043169;GO:0046914;GO:0046872;GO:0016787;GO:0003824;GO:0008270;GO:0016810;GO:0019239;GO:0016814;GO:0004132	K01493	ENOG4108UK2	F	sp|P32393|COMEB_BACSU|ComE operon protein 2 OS=Bacillus subtilis (strain 168) OX=224308 GN=comEB PE=3 SV=1	operon protein 2 [Bacillus stratosphericus LAMA 585]
gene1479	0.0251339	0.0502678	0	0	-Inf	1	1	gi|111111112|ref|scaffold2.1|	452225	452608	-	383	gene1479	GO:0090304;GO:0034641;GO:0006807;GO:0044699;GO:0006139;GO:0051716;GO:0044260;GO:0071704;GO:1901360;GO:0006281;GO:0009987;GO:0006725;GO:0006974;GO:0006950;GO:0044763;GO:0008152;GO:0046483;GO:0044238;GO:0050896;GO:0044237;GO:0043170;GO:0033554;GO:0006259;GO:0097159;GO:0005488;GO:0003676;GO:0003677;GO:1901363	K02237	ENOG4105KQC	L	sp|P39694|COMEA_BACSU|ComE operon protein 1 OS=Bacillus subtilis (strain 168) OX=224308 GN=comEA PE=1 SV=1	competence protein ComEA [Bacillus pumilus] AKC66710.1 competence protein ComEA [Bacillus pumilus]
gene148	0.12148	0.242961	0	0	-Inf	1	1	gi|111111111|ref|scaffold1.1|	141897	142604	+	707	gene148	GO:0005581;GO:0005578;GO:0031012;GO:0005576;GO:0044420;GO:0044421	-	ENOG4108812	S	sp|P29294|MYLK_RABIT|Myosin light chain kinase, smooth muscle OS=Oryctolagus cuniculus OX=9986 GN=MYLK PE=1 SV=2	hypothetical protein B4133_1902 [Bacillus pumilus]
gene1480	0.184315	0.36863	0	0	-Inf	1	1	gi|111111112|ref|scaffold2.1|	452975	453793	+	818	gene1480	GO:0044283;GO:0019752;GO:0044249;GO:0006807;GO:0044281;GO:0009064;GO:1901362;GO:1901360;GO:1901576;GO:0044710;GO:0044711;GO:0006561;GO:0006560;GO:0006520;GO:0071704;GO:1901605;GO:1901607;GO:0018130;GO:0044238;GO:0009987;GO:0009058;GO:0008152;GO:0043436;GO:0055114;GO:0046483;GO:0008652;GO:1901564;GO:1901566;GO:0006082;GO:0046394;GO:0016053;GO:0044237;GO:0009084;GO:0016646;GO:0016645;GO:0003824;GO:…	K02239	ENOG4108PJP	E	sp|P39696|COMER_BACSU|ComE operon protein 4 OS=Bacillus subtilis (strain 168) OX=224308 GN=comER PE=3 SV=3	late competence protein ComER [Bacillus sp. RRD69] SIT91306.1 competence protein ComER [Bacillus sp. RRD69]
gene1481	0.695371	1.39074	0	0	-Inf	1	1	gi|111111112|ref|scaffold2.1|	453842	454585	-	743	gene1481	GO:0032259;GO:0008152;GO:0003824;GO:0016740;GO:0016741;GO:0008168	-	ENOG4105DXX	Q	sp|P54458|YQEM_BACSU|Putative methyltransferase YqeM OS=Bacillus subtilis (strain 168) OX=224308 GN=yqeM PE=3 SV=1	SAM-dependent methyltransferase [Bacillus altitudinis] OPW99869.1 methyltransferase [Bacillus altitudinis]
gene1482	0.0795906	0.159181	0	0	-Inf	1	1	gi|111111112|ref|scaffold2.1|	454582	454938	-	356	gene1482	GO:0006417;GO:0080090;GO:0019222;GO:0051246;GO:0031326;GO:0031323;GO:0050789;GO:0010608;GO:0065007;GO:2000112;GO:0010468;GO:0060255;GO:0009889;GO:0050794;GO:0032268;GO:0010556;GO:0009892;GO:0031327;GO:0031324;GO:2000113;GO:0090069;GO:0051248;GO:0010605;GO:0009890;GO:0048519;GO:0032269;GO:0090071;GO:0044087;GO:0017148;GO:0010558;GO:0048523;GO:0022607;GO:0034622;GO:0044699;GO:0042255;GO:0042254;GO:…	K09710	ENOG4105KEM	S	sp|P54457|IOJAP_BACSU|Ribosomal silencing factor RsfS OS=Bacillus subtilis (strain 168) OX=224308 GN=rsfS PE=3 SV=1	iojap-like protein [Bacillus stratosphericus LAMA 585]
gene1483	0.791717	1.58343	0	0	-Inf	1	1	gi|111111112|ref|scaffold2.1|	454951	455439	-	488	gene1483	GO:0008152;GO:0042578;GO:0005488;GO:0043167;GO:0043169;GO:0008081;GO:0046872;GO:0016787;GO:0016788;GO:0003824	-	ENOG4108WF2	H	sp|P54456|YQEK_BACSU|Uncharacterized protein YqeK OS=Bacillus subtilis (strain 168) OX=224308 GN=yqeK PE=4 SV=1	phosphohydrolase [Bacillus pumilus] BAT49442.1 hydrolase [Bacillus pumilus] APP16413.1 phosphohydrolase [Bacillus pumilus]
gene1484	0.134047	0.268095	0	0	-Inf	1	1	gi|111111112|ref|scaffold2.1|	455504	456073	-	569	gene1484	GO:0008152;GO:0009058;GO:0019674;GO:0006732;GO:0006733;GO:0046496;GO:0009435;GO:0034641;GO:0009165;GO:0009108;GO:0044281;GO:0072524;GO:0072525;GO:1901360;GO:0006139;GO:0044710;GO:0051186;GO:1901362;GO:0051188;GO:0071704;GO:0019359;GO:0018130;GO:1901576;GO:0009987;GO:0006725;GO:0009117;GO:0034654;GO:1901564;GO:0090407;GO:0055086;GO:0046483;GO:0044238;GO:0044271;GO:1901566;GO:0044249;GO:0044237;GO:…	K00969	ENOG4108Z1W	H	sp|A8FFF0|NADD_BACP2|Probable nicotinate-nucleotide adenylyltransferase OS=Bacillus pumilus (strain SAFR-032) OX=315750 GN=nadD PE=3 SV=1	nicotinate-nicotinamide nucleotide adenylyltransferase [Bacillus pumilus] AKU33052.1 nicotinate-nucleotide adenylyltransferase [Bacillus pumilus]
gene1485	0.0712127	0.142425	0	0	-Inf	1	1	gi|111111112|ref|scaffold2.1|	456087	456284	-	197	gene1485	GO:0097159;GO:0003723;GO:0003676;GO:1901363;GO:0005488	K07574	ENOG4105HBR	J	sp|P54454|YQEI_BACSU|Probable RNA-binding protein YqeI OS=Bacillus subtilis (strain 168) OX=224308 GN=yqeI PE=4 SV=1	RNA-binding protein [Bacillus safensis] APT48026.1 RNA-binding protein [Bacillus safensis]
gene1486	1.42425	2.84851	0	0	-Inf	1	1	gi|111111112|ref|scaffold2.1|	456371	457234	-	863	gene1486	GO:0044710;GO:0055114;GO:0008152;GO:0009987;GO:0044237;GO:0071704;GO:0019752;GO:0044281;GO:0043436;GO:0006082;GO:0044238;GO:0043648;GO:0046417;GO:0044249;GO:0006807;GO:0044283;GO:1901362;GO:1901360;GO:1901576;GO:0044711;GO:0006520;GO:0006725;GO:0009058;GO:0009072;GO:0009073;GO:0008652;GO:1901564;GO:1901566;GO:0046394;GO:0016053;GO:0019438;GO:0043650;GO:0009423;GO:0032787;GO:0019632;GO:1901615;GO:…	K00014	ENOG4105E2X	E	sp|P54374|AROE_BACSU|Shikimate dehydrogenase (NADP(+)) OS=Bacillus subtilis (strain 168) OX=224308 GN=aroE PE=3 SV=2	shikimate dehydrogenase [Bacillus pumilus] AKU33054.1 shikimate dehydrogenase [Bacillus pumilus] BAT49445.1 shikimate 5-dehydrogenase [Bacillus pumilus] APP16410.1 shikimate dehydrogenase [Bacillus pumilus]
gene1487	2.99931	5.99862	0	0	-Inf	1	1	gi|111111112|ref|scaffold2.1|	457235	458335	-	1100	gene1487	GO:0006184;GO:0008152;GO:0044710;GO:0006807;GO:0044237;GO:0071704;GO:0009987;GO:1901564;GO:0034641;GO:0046434;GO:0009141;GO:0009143;GO:0009144;GO:0009146;GO:0009166;GO:0009164;GO:0034655;GO:0046039;GO:0006195;GO:0046130;GO:0009259;GO:1901360;GO:1901361;GO:0046700;GO:0006139;GO:0072523;GO:1901565;GO:1901068;GO:0042278;GO:1901069;GO:0009199;GO:0055086;GO:0006152;GO:0046483;GO:0009207;GO:0009205;GO:…	K06948	ENOG4105CQW	S	sp|P54453|YQEH_BACSU|Uncharacterized protein YqeH OS=Bacillus subtilis (strain 168) OX=224308 GN=yqeH PE=1 SV=1	ribosome biogenesis GTPase YqeH [Bacillus pumilus] KIL28184.1 hypothetical protein B4133_2539 [Bacillus pumilus]
gene1488	0.0418898	0.0837796	0	0	-Inf	1	1	gi|111111112|ref|scaffold2.1|	458338	458880	-	542	gene1488	GO:0008152;GO:0016311;GO:0009987;GO:0044237;GO:0006796;GO:0006793;GO:0016787;GO:0003824;GO:0016791;GO:0016788;GO:0042578;GO:0008967	K07015	ENOG4108WJV	V	sp|P54452|YQEG_BACSU|Uncharacterized protein YqeG OS=Bacillus subtilis (strain 168) OX=224308 GN=yqeG PE=4 SV=1	had superfamily (subfamily iiia) phosphatase [Bacillus sp. M 2-6] EMI12345.1 hydrolase [Bacillus stratosphericus LAMA 585] KIL15501.1 hypothetical protein B4129_2406 [Bacillus pumilus] KIL16184.1 hypothetical protein B4107_2363 [Bacillus pumilus] KIL21725.1 hypothetical protein B4134_2487 [Bacillus pumilus] KIL28185.1 hypothetical protein B4133_2540 [Bacillus pumilus]
gene1489	1.51222	3.02444	0	0	-Inf	1	1	gi|111111112|ref|scaffold2.1|	459222	459362	+	140	gene1489	GO:0016310;GO:0009987;GO:0044237;GO:0006796;GO:0008152;GO:0006793;GO:0003824;GO:0016740;GO:0016301;GO:0016772	K06371	ENOG410732S	S	sp|Q7WY62|SDA_BACSU|Sporulation inhibitor sda OS=Bacillus subtilis (strain 168) OX=224308 GN=sda PE=1 SV=1	sporulation histidine kinase inhibitor Sda [Bacillus subtilis] YP_054588.1 sporulation inhibitor sda [Bacillus subtilis subsp. subtilis str. 168] Q7WY62.1 RecName: Full=Sporulation inhibitor sda; AltName: Full=Histidine kinase KinA inhibitor CAE01463.1 check point factor coupling initiation of sporulation and replication initiation [Bacillus subtilis subsp. subtilis str. 168] AGA21478.1 Sporulati…
gene149	0.0502678	0.100536	0	0	-Inf	1	1	gi|111111111|ref|scaffold1.1|	142709	143020	-	311	gene149	GO:0040007;GO:0005581;GO:0005578;GO:0031012;GO:0005576;GO:0044420;GO:0044421	-	ENOG4108MNJ	S	sp|P32017|CO9A3_CHICK|Collagen alpha-3(IX) chain OS=Gallus gallus OX=9031 GN=COL9A3 PE=2 SV=1	collagen-like protein [Bacillus pumilus]
gene1490	3.79522	7.59043	0	0	-Inf	1	1	gi|111111112|ref|scaffold2.1|	459727	460299	-	572	gene1490	GO:0008152;GO:0044238;GO:0044710;GO:0006629;GO:0071704;GO:0016787;GO:0003824;GO:0016788	-	ENOG41082S2	E	sp|P54451|YQEF_BACSU|Uncharacterized lipoprotein YqeF OS=Bacillus subtilis (strain 168) OX=224308 GN=yqeF PE=3 SV=1	hypothetical protein ID12_17105 [Bacillus pumilus]
gene1491	0.217827	0.435654	0	0	-Inf	1	1	gi|111111112|ref|scaffold2.1|	460527	461147	-	620	gene1491	GO:0005975;GO:0071704;GO:0008152;GO:0044238;GO:0043170;GO:0009987;GO:0009056;GO:0044237;GO:0044036;GO:0071840;GO:0044260;GO:0071554;GO:0044699;GO:0044763;GO:1901575;GO:0009057;GO:0000272;GO:0010383;GO:0005976;GO:0016052;GO:0045493;GO:0045491;GO:0010410;GO:0016810;GO:0016787;GO:0003824	K22278	ENOG4108ZJ4	G	sp|P04675|NODB_BRASP|Chitooligosaccharide deacetylase OS=Bradyrhizobium sp. (strain ANU 289) OX=377 GN=nodB PE=3 SV=2	polysaccharide deacetylase [Bacillus sp. M 2-6] EIL86155.1 polysaccharide deacetylase [Bacillus sp. M 2-6]
gene1492	1.95206	3.90413	0	0	-Inf	1	1	gi|111111112|ref|scaffold2.1|	461434	462555	-	1121	gene1492	-	K06366	ENOG4108KVU	T	sp|Q59HN8|RAPH_BACSU|Response regulator aspartate phosphatase H OS=Bacillus subtilis (strain 168) OX=224308 GN=rapH PE=1 SV=2	aspartate phosphatase [Bacillus pumilus] AMB90459.1 aspartate phosphatase [Bacillus pumilus] AMM89678.1 aspartate phosphatase [Bacillus pumilus]
gene1495	0.0628347	0.125669	0	0	-Inf	1	1	gi|111111112|ref|scaffold2.1|	463993	464403	-	410	gene1495	-	-	-	-	-	hypothetical protein [Bacillus pumilus] AKU33063.1 hypothetical protein ID12_17130 [Bacillus pumilus]
gene1497	0.557134	1.11427	0	0	-Inf	1	1	gi|111111112|ref|scaffold2.1|	465410	466894	-	1484	gene1497	GO:0005975;GO:0071704;GO:0008152;GO:0044238;GO:0043170;GO:0009987;GO:0009056;GO:0044237;GO:0044036;GO:0071840;GO:0044260;GO:0071554;GO:0044699;GO:0044763;GO:1901575;GO:0009057;GO:0000272;GO:0010383;GO:0005976;GO:0016052;GO:0045493;GO:0045491;GO:0010410;GO:0016810;GO:0016787;GO:0003824	K22278	ENOG4108ZJ4	G	sp|O34798|PDAC_BACSU|Peptidoglycan-N-acetylmuramic acid deacetylase PdaC OS=Bacillus subtilis (strain 168) OX=224308 GN=pdaC PE=1 SV=1	hypothetical protein [Bacillus pumilus] AKU33066.1 hypothetical protein ID12_17145 [Bacillus pumilus]
gene1499	0.24715	0.4943	0	0	-Inf	1	1	gi|111111112|ref|scaffold2.1|	467485	467961	-	476	gene1499	GO:0008152;GO:0008080;GO:0016740;GO:0003824;GO:0016407;GO:0016746;GO:0016747;GO:0016410	-	ENOG4105VW6	S	sp|Q9KL03|ATDA_VIBCH|Spermidine N(1)-acetyltransferase OS=Vibrio cholerae serotype O1 (strain ATCC 39315 / El Tor Inaba N16961) OX=243277 GN=speG PE=1 SV=1	GNAT family N-acetyltransferase [Bacillus pumilus]
gene15	0.142425	0.284851	0	0	-Inf	1	1	gi|111111111|ref|scaffold1.1|	17132	17704	+	572	gene15	-	-	ENOG4106S7R	S	-	branched-chain amino acid aminotransferase [Bacillus stratosphericus LAMA 585]
gene150	0.00418898	0.00837796	0	0	-Inf	1	1	gi|111111111|ref|scaffold1.1|	143065	143409	-	344	gene150	-	-	-	-	-	hypothetical protein [Bacillus altitudinis] KWZ67507.1 hypothetical protein HQ51_0202000 [Bacillus altitudinis]
gene1500	134.374	268.748	0	0	-Inf	1	1	gi|111111112|ref|scaffold2.1|	468376	468702	+	326	gene1500	-	-	-	-	-	circular bacteriocin, circularin A/uberolysin family [Bacillus sp. M 2-6] EIL86172.1 hypothetical protein BAME_05460 [Bacillus sp. M 2-6]
gene1501	0.159181	0.318362	0	0	-Inf	1	1	gi|111111112|ref|scaffold2.1|	468930	470540	+	1610	gene1501	-	-	-	-	-	hypothetical protein [Bacillus pumilus] AKC66738.1 hypothetical protein VT48_12020 [Bacillus pumilus] APP16391.1 hypothetical protein BS467_11975 [Bacillus pumilus]
gene1502	0.0293229	0.0586457	0	0	-Inf	1	1	gi|111111112|ref|scaffold2.1|	470650	471042	+	392	gene1502	-	-	-	-	-	hypothetical protein [Bacillus pumilus] AKC66739.1 hypothetical protein VT48_12025 [Bacillus pumilus] APP16390.1 hypothetical protein BS467_11970 [Bacillus pumilus]
gene1503	0.213638	0.427276	0	0	-Inf	1	1	gi|111111112|ref|scaffold2.1|	471064	471609	+	545	gene1503	-	-	-	-	-	hypothetical protein [Bacillus pumilus] AMM89747.1 hypothetical protein UP15_12415 [Bacillus pumilus]
gene1504	0.795906	1.59181	0	0	-Inf	1	1	gi|111111112|ref|scaffold2.1|	471926	472270	+	344	gene1504	GO:0006200;GO:0046434;GO:0009166;GO:0009167;GO:0009164;GO:0009161;GO:0046130;GO:1901360;GO:0009169;GO:0044710;GO:0009199;GO:0042454;GO:0009207;GO:0009205;GO:0009203;GO:0046034;GO:0046128;GO:0046483;GO:1901564;GO:1901565;GO:0034641;GO:0006163;GO:0019637;GO:0044281;GO:0009141;GO:0009143;GO:0009144;GO:0009146;GO:0006807;GO:0006195;GO:1901575;GO:1901361;GO:0009150;GO:0009154;GO:0009158;GO:0046700;GO:…	-	ENOG4108RDQ	V	sp|Q56903|RFBE_YEREN|O-antigen export system ATP-binding protein RfbE OS=Yersinia enterocolitica OX=630 GN=rfbE PE=3 SV=1	ABC transporter ATP-binding protein [Bacillus pumilus] AKU33073.1 ABC transporter [Bacillus pumilus]
gene1505	0.0837796	0.167559	0	0	-Inf	1	1	gi|111111112|ref|scaffold2.1|	472323	472616	-	293	gene1505	-	K06327	ENOG4107BM8	S	-	hypothetical protein [Bacillus pumilus]
gene1506	0.117291	0.234583	0	0	-Inf	1	1	gi|111111112|ref|scaffold2.1|	472800	473117	+	317	gene1506	-	-	-	-	sp|O31636|YJCN_BACSU|Uncharacterized protein YjcN OS=Bacillus subtilis (strain 168) OX=224308 GN=yjcN PE=3 SV=1	hypothetical protein [Bacillus altitudinis] KWZ65615.1 hypothetical protein HQ51_0214300 [Bacillus altitudinis]
gene1507	0.594835	1.18967	0	0	-Inf	1	1	gi|111111112|ref|scaffold2.1|	473608	474789	-	1181	gene1507	GO:0006810;GO:0009987;GO:0055085;GO:0044765;GO:0044763;GO:0051234;GO:0051179;GO:0044699;GO:0022891;GO:0005215;GO:0022857;GO:0022892;GO:0044425;GO:0016021;GO:0016020;GO:0031224	-	ENOG4108BPT	G	sp|O52733|XYLT_LACBR|D-xylose transporter OS=Lactobacillus brevis OX=1580 GN=xylT PE=1 SV=1	MFS transporter [Bacillus sp. L_1B0_12] KOA72840.1 MFS transporter [Bacillus stratosphericus] KSU69456.1 MFS transporter [Bacillus cellulasensis] ANT57360.1 MFS transporter [Bacillus pumilus]
gene1508	0.16337	0.32674	0	0	-Inf	1	1	gi|111111112|ref|scaffold2.1|	475033	476454	-	1421	gene1508	GO:0008152;GO:0071704;GO:0044723;GO:0044238;GO:0005975;GO:0005996;GO:0019321;GO:0019323;GO:0046365;GO:0051167;GO:1901576;GO:0019569;GO:0019568;GO:0090407;GO:0019566;GO:1901575;GO:0009987;GO:0046373;GO:0009058;GO:0009056;GO:0044724;GO:1901137;GO:1901135;GO:0016052;GO:0044237;GO:1901159;GO:0006796;GO:0019572;GO:0006793;GO:0019637;GO:0019318;GO:0006004;GO:0016853;GO:0003824;GO:0008733;GO:0016861;GO:…	K01804	ENOG4105CAC	G	sp|Q8EMP4|ARAA_OCEIH|L-arabinose isomerase OS=Oceanobacillus iheyensis (strain DSM 14371 / CIP 107618 / JCM 11309 / KCTC 3954 / HTE831) OX=221109 GN=araA PE=3 SV=2	L-arabinose isomerase [Bacillus pumilus] AHL72187.1 arabinose isomerase [Bacillus pumilus]
gene1509	0.0209449	0.0418898	0	0	-Inf	1	1	gi|111111112|ref|scaffold2.1|	476472	477011	-	539	gene1509	GO:0008152;GO:0071704;GO:0044238;GO:0016052;GO:0019321;GO:0019323;GO:1901575;GO:0044723;GO:0044724;GO:0046373;GO:0005996;GO:0019572;GO:0046365;GO:0019568;GO:0019566;GO:0009056;GO:0005975;GO:0046872;GO:0005488;GO:0043169;GO:0043167;GO:0003824;GO:0016853;GO:0008742;GO:0016857;GO:0016854;GO:0016829;GO:0008738;GO:0016830;GO:0016832;GO:0046914;GO:0008270	K03077	ENOG4105CR5	G	sp|Q9S469|ARAD_GEOSE|L-ribulose-5-phosphate 4-epimerase OS=Geobacillus stearothermophilus OX=1422 GN=araD PE=3 SV=1	ribulose 5-phosphate epimerase [Bacillus altitudinis] KLV21946.1 ribulose 5-phosphate epimerase [Bacillus altitudinis]
gene151	0.00837796	0.0167559	0	0	-Inf	1	1	gi|111111111|ref|scaffold1.1|	143484	144137	-	653	gene151	-	-	-	-	-	hypothetical protein [Bacillus pumilus]
gene1510	0.0795906	0.159181	0	0	-Inf	1	1	gi|111111112|ref|scaffold2.1|	477170	478891	-	1721	gene1510	GO:0071704;GO:0008152;GO:0044238;GO:0005975;GO:0009987;GO:0044237;GO:0016310;GO:0006796;GO:0006793;GO:0044262;GO:0046835;GO:0016773;GO:0016772;GO:0003824;GO:0016740;GO:0016301;GO:0019200;GO:0008741	-	ENOG4105EGA	G	-	carbohydrate kinase [Bacillus stratosphericus LAMA 585]
gene1511	0.330929	0.661859	0	0	-Inf	1	1	gi|111111112|ref|scaffold2.1|	479068	480180	+	1112	gene1511	GO:0032774;GO:0019222;GO:0031326;GO:0031323;GO:0090304;GO:0044249;GO:0034641;GO:0006807;GO:0034645;GO:1901362;GO:0050789;GO:1901360;GO:0080090;GO:0006139;GO:0044260;GO:0071704;GO:2000112;GO:0060255;GO:0010467;GO:0065007;GO:0010468;GO:0018130;GO:1901576;GO:0019219;GO:0006725;GO:0009987;GO:0009889;GO:0050794;GO:0009058;GO:0009059;GO:0051171;GO:0008152;GO:2001141;GO:0034654;GO:0046483;GO:0016070;GO:…	K02103	ENOG4108S44	K	sp|P96711|ARAR_BACSU|Arabinose metabolism transcriptional repressor OS=Bacillus subtilis (strain 168) OX=224308 GN=araR PE=1 SV=3	GntR family transcriptional regulator [Bacillus pumilus] ANT57364.1 GntR family transcriptional regulator [Bacillus pumilus]
gene1512	1.4452	2.8904	0	0	-Inf	1	1	gi|111111112|ref|scaffold2.1|	480186	481202	-	1016	gene1512	GO:0008152;GO:0017001;GO:0016999;GO:0009987;GO:0044237;GO:0044248;GO:0017144;GO:0009056;GO:0016812;GO:0003824;GO:0016810;GO:0008800;GO:0016787;GO:0005623;GO:0044462;GO:0044464;GO:0030313;GO:0031975;GO:0071944;GO:0042597;GO:0030288;GO:0030312	-	ENOG4108HUX	V	sp|P24735|AMPC_PSEAE|Beta-lactamase OS=Pseudomonas aeruginosa (strain ATCC 15692 / DSM 22644 / CIP 104116 / JCM 14847 / LMG 12228 / 1C / PRS 101/ PAO1) OX=208964 GN=ampC PE=1 SV=2	serine hydrolase [Bacillus pumilus]
gene1513	0.0502678	0.100536	0	0	-Inf	1	1	gi|111111112|ref|scaffold2.1|	481213	481677	-	464	gene1513	GO:0019222;GO:0031326;GO:0031323;GO:0050789;GO:0080090;GO:2000112;GO:0060255;GO:0065007;GO:0010468;GO:0019219;GO:0009889;GO:0050794;GO:0051171;GO:2001141;GO:0051252;GO:0006355;GO:0010556;GO:0032774;GO:0090304;GO:0044249;GO:0034641;GO:0006807;GO:0034645;GO:1901362;GO:1901360;GO:0006139;GO:0044260;GO:0071704;GO:0010467;GO:0018130;GO:1901576;GO:0006725;GO:0009987;GO:0009058;GO:0009059;GO:0008152;GO:…	K23775	ENOG41067TZ	K	sp|P70993|YWHA_BACSU|Uncharacterized HTH-type transcriptional regulator YwhA OS=Bacillus subtilis (strain 168) OX=224308 GN=ywhA PE=4 SV=1	transcriptional regulator [Bacillus stratosphericus LAMA 585]
gene1514	0.272284	0.544567	0	0	-Inf	1	1	gi|111111112|ref|scaffold2.1|	481763	482494	-	731	gene1514	GO:0008152;GO:0044710;GO:0055114;GO:0003824;GO:0016667;GO:0015036;GO:0015035;GO:0016491;GO:0016853	-	ENOG4108Z1M	Q	sp|P39598|YWBO_BACSU|Uncharacterized protein YwbO OS=Bacillus subtilis (strain 168) OX=224308 GN=ywbO PE=4 SV=1	dsba oxidoreductase [Bacillus stratosphericus LAMA 585]
gene1515	0.0963465	0.192693	0	0	-Inf	1	1	gi|111111112|ref|scaffold2.1|	482637	483194	-	557	gene1515	GO:0044238;GO:0005975;GO:0071704;GO:0008152;GO:0030246;GO:0005488;GO:0016853;GO:0003824	K08094	ENOG41080HJ	G	sp|P42404|PHI_BACSU|3-hexulose-6-phosphate isomerase OS=Bacillus subtilis (strain 168) OX=224308 GN=hxlB PE=1 SV=1	6-phospho-3-hexuloisomerase [Bacillus stratosphericus] KOA72848.1 6-phospho 3-hexuloisomerase [Bacillus stratosphericus]
gene1516	0.0335118	0.0670237	0	0	-Inf	1	1	gi|111111112|ref|scaffold2.1|	483191	483823	-	632	gene1516	GO:0008152;GO:0071704;GO:0044238;GO:0044281;GO:0044710;GO:0009987;GO:0044237;GO:1901564;GO:0072528;GO:0044249;GO:0034641;GO:0006807;GO:0046112;GO:1901362;GO:1901360;GO:0072527;GO:0006139;GO:0019856;GO:0006206;GO:0006207;GO:0018130;GO:1901576;GO:0006725;GO:0009112;GO:0009058;GO:0044271;GO:0055086;GO:0046483;GO:1901566;GO:0005975;GO:0046365;GO:0042365;GO:0019752;GO:0044282;GO:0044712;GO:0019854;GO:…	K08093	ENOG4105H6Q	G	sp|P42405|HPS_BACSU|3-hexulose-6-phosphate synthase OS=Bacillus subtilis (strain 168) OX=224308 GN=hxlA PE=1 SV=2	3-hexulose-6-phosphate synthase [Bacillus aerophilus]
gene1517	0.104725	0.209449	0	0	-Inf	1	1	gi|111111112|ref|scaffold2.1|	484162	484500	-	338	gene1517	-	-	ENOG4105KVH	K	sp|P42406|HXLR_BACSU|HTH-type transcriptional activator HxlR OS=Bacillus subtilis (strain 168) OX=224308 GN=hxlR PE=1 SV=3	transcriptional regulator [Bacillus sp. M 2-6] EMI12367.1 positive regulator of hxlab expression [Bacillus stratosphericus LAMA 585]
gene1518	0.502678	1.00536	0	0	-Inf	1	1	gi|111111112|ref|scaffold2.1|	484590	485459	-	869	gene1518	GO:0008152;GO:0044238;GO:0071704;GO:0019538;GO:0043170;GO:0006508;GO:0016787;GO:0003824;GO:0008233;GO:0070011;GO:0008236;GO:0017171	-	ENOG4108QZM	I	sp|P9WK87|NLHH_MYCTU|Carboxylesterase NlhH OS=Mycobacterium tuberculosis (strain ATCC 25618 / H37Rv) OX=83332 GN=nlhH PE=1 SV=1	alpha/beta hydrolase [Bacillus pumilus]
gene1519	0.0963465	0.192693	0	0	-Inf	1	1	gi|111111112|ref|scaffold2.1|	485513	485890	-	377	gene1519	-	-	-	-	-	hypothetical protein [Bacillus sp. RRD69] SIT91566.1 hypothetical protein SAMN05216491_2623 [Bacillus sp. RRD69]
gene152	0.527811	1.05562	0	0	-Inf	1	1	gi|111111111|ref|scaffold1.1|	144515	144895	+	380	gene152	-	K05937	ENOG4108ZMX	S	sp|Q797E6|FRA_BACSU|Intracellular iron chaperone frataxin OS=Bacillus subtilis (strain 168) OX=224308 GN=fra PE=1 SV=1	hypothetical protein C883_1546 [Bacillus stratosphericus LAMA 585]
gene1520	0.00418898	0.00837796	0	0	-Inf	1	1	gi|111111112|ref|scaffold2.1|	485909	486256	-	347	gene1520	-	-	-	-	sp|D4G3R3|WAPI_BACNB|Immunity protein WapI OS=Bacillus subtilis subsp. natto (strain BEST195) OX=645657 GN=wapI PE=1 SV=1	hypothetical protein [Bacillus sp. L_1B0_12] KKK10639.1 hypothetical protein UF15_05985 [Bacillus sp. L_1B0_12]
gene1521	0.0795906	0.159181	0	0	-Inf	1	1	gi|111111112|ref|scaffold2.1|	486331	486807	-	476	gene1521	-	-	-	-	-	Uncharacterised protein [Streptococcus pneumoniae]
gene1522	0.431465	0.86293	0	0	-Inf	1	1	gi|111111112|ref|scaffold2.1|	487236	487604	-	368	gene1522	-	-	-	-	-	Uncharacterised protein [Streptococcus pneumoniae]
gene1523	207.208	414.416	0	0	-Inf	1	1	gi|111111112|ref|scaffold2.1|	487610	494650	-	7040	gene1523	GO:0008152;GO:0071704;GO:0044238;GO:0043170;GO:0003824	-	ENOG4105CNA	M	sp|D4G3R4|WAPA_BACNB|tRNA(Glu)-specific nuclease WapA OS=Bacillus subtilis subsp. natto (strain BEST195) OX=645657 GN=wapA PE=1 SV=2	Cell wall-associated polypeptide CWBP200 [Streptococcus pneumoniae]
gene1524	0.0754016	0.150803	0	0	-Inf	1	1	gi|111111112|ref|scaffold2.1|	494820	495629	-	809	gene1524	GO:0008152;GO:0017001;GO:0044248;GO:0016999;GO:0009987;GO:0009056;GO:0044237;GO:0017144;GO:0043168;GO:0033218;GO:0008658;GO:0031406;GO:0008144;GO:1901681;GO:0005488;GO:0097159;GO:0033293;GO:0043167;GO:1901363;GO:0016787;GO:0008800;GO:0016812;GO:0016810;GO:0003824	K17838	ENOG4108HWY	V	sp|P54427|YBXI_BACSU|Probable beta-lactamase YbxI OS=Bacillus subtilis (strain 168) OX=224308 GN=ybxI PE=1 SV=2	putative beta-lactamase ybxI precursor [Bacillus pumilus]
gene1525	0.213638	0.427276	0	0	-Inf	1	1	gi|111111112|ref|scaffold2.1|	495724	496683	-	959	gene1525	GO:0044710;GO:0055114;GO:0008152;GO:0016491;GO:0016627;GO:0003824;GO:0003995;GO:0005488;GO:0043167;GO:1901363;GO:1901265;GO:0043168;GO:0050662;GO:0050660;GO:0000166;GO:0036094;GO:0048037;GO:0097159	-	ENOG4105FDT	I	sp|P96608|YDBM_BACSU|Putative acyl-CoA dehydrogenase YdbM OS=Bacillus subtilis (strain 168) OX=224308 GN=ydbM PE=2 SV=1	acyl-CoA dehydrogenase [Bacillus stratosphericus] KOA76443.1 acyl-CoA dehydrogenase [Bacillus stratosphericus]
gene1526	0.20526	0.41052	0	0	-Inf	1	1	gi|111111112|ref|scaffold2.1|	497014	497802	+	788	gene1526	GO:0006200;GO:0046434;GO:0009166;GO:0009167;GO:0044281;GO:0009161;GO:0046130;GO:1901360;GO:0009169;GO:0044710;GO:0009199;GO:0042454;GO:0009207;GO:0009205;GO:0009203;GO:0046034;GO:0046128;GO:0046483;GO:0009164;GO:1901564;GO:1901565;GO:0034641;GO:0006163;GO:0019637;GO:0009141;GO:0009143;GO:0009144;GO:0009146;GO:0006807;GO:0006195;GO:1901575;GO:1901361;GO:0009150;GO:0009154;GO:0009158;GO:0046700;GO:…	K16960	ENOG4105CDA	E	sp|P54954|YXEO_BACSU|Probable amino-acid import ATP-binding protein YxeO OS=Bacillus subtilis (strain 168) OX=224308 GN=yxeO PE=1 SV=1	amino acid ABC transporter ATP-binding protein [Bacillus pumilus] KIL28725.1 hypothetical protein B4133_2592 [Bacillus pumilus]
gene1527	0.0460788	0.0921576	0	0	-Inf	1	1	gi|111111112|ref|scaffold2.1|	497799	498659	+	860	gene1527	GO:0006810;GO:0051234;GO:0051179;GO:0006778;GO:0006779;GO:0044249;GO:0034641;GO:0006807;GO:1901362;GO:1901360;GO:1901576;GO:0051186;GO:0051188;GO:0071704;GO:0033014;GO:0033013;GO:0018130;GO:0009987;GO:0006725;GO:0009058;GO:0008152;GO:1901564;GO:0046483;GO:0044271;GO:1901566;GO:0044237;GO:0019438;GO:0005215;GO:0016829;GO:0016830;GO:0016831;GO:0003824;GO:0004853;GO:0005623;GO:0044462;GO:0044464;GO:…	K16957	ENOG4108KE3	E	sp|O34852|TCYK_BACSU|L-cystine-binding protein TcyK OS=Bacillus subtilis (strain 168) OX=224308 GN=tcyK PE=1 SV=1	amino acid ABC transporter substrate-binding protein [Bacillus stratosphericus] OQP20957.1 amino acid ABC transporter substrate-binding protein [Bacillus stratosphericus]
gene1528	0.0628347	0.125669	0	0	-Inf	1	1	gi|111111112|ref|scaffold2.1|	498656	499354	+	698	gene1528	GO:0006810;GO:0051179;GO:0051234;GO:0005215;GO:0016020;GO:0016021;GO:0044464;GO:0005623;GO:0071944;GO:0005886;GO:0044425;GO:0031224	K16958	ENOG4105JFS	E	sp|O34315|TCYL_BACSU|L-cystine transport system permease protein TcyL OS=Bacillus subtilis (strain 168) OX=224308 GN=tcyL PE=1 SV=1	amino acid ABC transporter permease [Bacillus sp. RRD69] SIT91690.1 amino acid ABC transporter membrane protein 1, PAAT family [Bacillus sp. RRD69]
gene1529	0.0167559	0.0335118	0	0	-Inf	1	1	gi|111111112|ref|scaffold2.1|	499367	500080	+	713	gene1529	GO:0006810;GO:0051179;GO:0051234;GO:0005215;GO:0016020;GO:0016021;GO:0044464;GO:0005623;GO:0071944;GO:0005886;GO:0044425;GO:0031224	K16959	ENOG4108V4J	E	sp|P54953|YXEN_BACSU|Probable amino-acid permease protein YxeN OS=Bacillus subtilis (strain 168) OX=224308 GN=yxeN PE=1 SV=1	arginine/histidine ABC transporter permease [Streptococcus pneumoniae]
gene153	0.293229	0.586457	0	0	-Inf	1	1	gi|111111111|ref|scaffold1.1|	144953	145486	-	533	gene153	GO:0008152;GO:0016311;GO:0009987;GO:0044237;GO:0006796;GO:0006793;GO:0003824;GO:0016787;GO:0016791;GO:0016788;GO:0042578;GO:0008195;GO:0016020	K19302	ENOG4107PNE	I	sp|P42334|BCRC_BACLI|Bacitracin transport permease protein BcrC OS=Bacillus licheniformis OX=1402 GN=bcrC PE=3 SV=1	undecaprenyl-diphosphatase [Bacillus pumilus] APP17024.1 undecaprenyl-diphosphatase [Bacillus pumilus]
gene1530	0.414709	0.829418	0	0	-Inf	1	1	gi|111111112|ref|scaffold2.1|	500116	500946	-	830	gene1530	GO:0044710;GO:0008152;GO:0055114;GO:0016491;GO:0043169;GO:0046914;GO:0043167;GO:0003824;GO:0005488;GO:0046872;GO:0016684;GO:0016209;GO:0004096;GO:0004601	K07217	ENOG4105WEF	P	sp|O34423|YJQC_BACSU|Uncharacterized protein YjqC OS=Bacillus subtilis (strain 168) OX=224308 GN=yjqC PE=3 SV=2	manganese catalase [Bacillus pumilus]
gene1531	439.847	760.333	119.361	0.156985	-2.6713	1	1	gi|111111112|ref|scaffold2.1|	501075	502136	-	1061	gene1531	GO:0044710;GO:0055114;GO:0008152;GO:0043169;GO:0046914;GO:0008270;GO:0043167;GO:0003824;GO:0005488;GO:0046872;GO:0016491;GO:0000721;GO:0016614;GO:0016616	K00004	ENOG4107SVJ	C	sp|O34788|BDHA_BACSU|(R,R)-butanediol dehydrogenase OS=Bacillus subtilis (strain 168) OX=224308 GN=bdhA PE=3 SV=1	2,3-butanediol dehydrogenase [Bacillus stratosphericus LAMA 585]
gene1532	0.150803	0.301607	0	0	-Inf	1	1	gi|111111112|ref|scaffold2.1|	502186	503406	-	1220	gene1532	GO:0006810;GO:0009987;GO:0055085;GO:0044765;GO:0044763;GO:0051234;GO:0051179;GO:0044699;GO:0015893;GO:0050896;GO:0042493;GO:1901998;GO:0042221;GO:0042891;GO:0044425;GO:0016021;GO:0016020;GO:0031224	-	ENOG4107WR2	G	sp|O31561|YFIS_BACSU|Uncharacterized MFS-type transporter YfiS OS=Bacillus subtilis (strain 168) OX=224308 GN=yfiS PE=3 SV=1	MFS transporter [Bacillus pumilus] AKU33109.1 permease [Bacillus pumilus]
gene1533	0.146614	0.293229	0	0	-Inf	1	1	gi|111111112|ref|scaffold2.1|	503522	503671	-	149	gene1533	-	-	-	-	-	hypothetical protein [Bacillus pumilus]
gene1534	0.188504	0.377008	0	0	-Inf	1	1	gi|111111112|ref|scaffold2.1|	503778	504527	-	749	gene1534	GO:0055114;GO:0044710;GO:0008152;GO:0016491;GO:0003824;GO:0016614;GO:0016616;GO:0016740;GO:0016746;GO:0016747;GO:0004312;GO:0004316	-	ENOG4107EXU	S	sp|Q56318|Y019_THEMA|Uncharacterized oxidoreductase TM_0019 OS=Thermotoga maritima (strain ATCC 43589 / MSB8 / DSM 3109 / JCM 10099) OX=243274 GN=TM_0019 PE=3 SV=2	3-ketoacyl-ACP reductase [Bacillus altitudinis] OJT61642.1 3-ketoacyl-ACP reductase [Bacillus altitudinis]
gene1535	1.03049	2.06098	0	0	-Inf	1	1	gi|111111112|ref|scaffold2.1|	504722	505921	-	1199	gene1535	GO:0008152;GO:0044710;GO:0055114;GO:0071704;GO:0044281;GO:0006066;GO:1901615;GO:0015976;GO:0044699;GO:0016491;GO:0003824;GO:0005488;GO:0043169;GO:0043167;GO:0046872;GO:0016614;GO:0016616;GO:0004022;GO:0016620;GO:0016903;GO:0008774	-	ENOG4105C0A	C	sp|P45513|DHAT_CITFR|1,3-propanediol dehydrogenase OS=Citrobacter freundii OX=546 GN=dhaT PE=3 SV=1	iron-containing alcohol dehydrogenase [Bacillus sp. L_1B0_12] KKK10623.1 alcohol dehydrogenase [Bacillus sp. L_1B0_12]
gene1536	0.196882	0.393764	0	0	-Inf	1	1	gi|111111112|ref|scaffold2.1|	505918	507360	-	1442	gene1536	GO:0006865;GO:0006820;GO:0044699;GO:0055085;GO:0071705;GO:0035725;GO:0015849;GO:0015672;GO:0009987;GO:0006812;GO:0006811;GO:0006810;GO:0015711;GO:0006814;GO:0015804;GO:0034220;GO:0044765;GO:0030001;GO:0051234;GO:0051179;GO:0046942;GO:0071702;GO:0003333;GO:0044763;GO:0032328;GO:0005342;GO:0005343;GO:0005416;GO:0015081;GO:0008509;GO:0015077;GO:0005294;GO:0015370;GO:0046873;GO:0022804;GO:0015655;GO:…	K03310	ENOG4105BZG	E	sp|Q45068|ALST_BACSU|Amino-acid carrier protein AlsT OS=Bacillus subtilis (strain 168) OX=224308 GN=alsT PE=2 SV=1	sodium:alanine symporter [Bacillus sp. L_1B0_12]
gene1537	0.360252	0.720505	0	0	-Inf	1	1	gi|111111112|ref|scaffold2.1|	507509	508384	+	875	gene1537	GO:0032774;GO:0019222;GO:0031326;GO:0031323;GO:0090304;GO:0044249;GO:0034641;GO:0006807;GO:0034645;GO:1901362;GO:0050789;GO:1901360;GO:0080090;GO:0006139;GO:0044260;GO:0071704;GO:2000112;GO:0060255;GO:0010467;GO:0065007;GO:0010468;GO:0018130;GO:1901576;GO:0019219;GO:0006725;GO:0009987;GO:0009889;GO:0050794;GO:0009058;GO:0009059;GO:0051171;GO:0008152;GO:2001141;GO:0034654;GO:0046483;GO:0016070;GO:…	-	ENOG4107V2S	K	sp|P96725|YWQM_BACSU|Uncharacterized HTH-type transcriptional regulator YwqM OS=Bacillus subtilis (strain 168) OX=224308 GN=ywqM PE=4 SV=2	LysR family transcriptional regulator [Bacillus aerophilus]
gene1538	0.251339	0.502678	0	0	-Inf	1	1	gi|111111112|ref|scaffold2.1|	508523	509563	-	1040	gene1538	GO:0046434;GO:0009141;GO:0009143;GO:0009144;GO:0009146;GO:0009166;GO:0009167;GO:0009128;GO:0006807;GO:1901360;GO:0044237;GO:0009161;GO:0009123;GO:0006195;GO:0009126;GO:0009259;GO:0044699;GO:0009125;GO:0046700;GO:0006139;GO:0044710;GO:0051234;GO:1901565;GO:0046130;GO:0046483;GO:0042278;GO:0072523;GO:0006200;GO:0055085;GO:0071704;GO:0009199;GO:0055086;GO:0006152;GO:0009169;GO:0009207;GO:0009205;GO:…	K01992	ENOG4108KYE	V	sp|P94442|YFIN_BACSU|Putative transport permease YfiN OS=Bacillus subtilis (strain 168) OX=224308 GN=yfiN PE=3 SV=1	ABC transporter [Streptococcus pneumoniae]
gene1539	0.0418898	0.0837796	0	0	-Inf	1	1	gi|111111112|ref|scaffold2.1|	509637	510803	-	1166	gene1539	GO:0046434;GO:0009141;GO:0009143;GO:0009144;GO:0009146;GO:0009166;GO:0009167;GO:0009128;GO:0006807;GO:1901360;GO:0044237;GO:0009161;GO:0009123;GO:0006195;GO:0009126;GO:0009259;GO:0044699;GO:0009125;GO:0046700;GO:0006139;GO:0044710;GO:0051234;GO:1901565;GO:0046130;GO:0046483;GO:0042278;GO:0072523;GO:0006200;GO:0055085;GO:0071704;GO:0009199;GO:0055086;GO:0006152;GO:0009169;GO:0009207;GO:0009205;GO:…	K01992	ENOG41090VJ	V	sp|P94441|YFIM_BACSU|Putative transport permease YfiM OS=Bacillus subtilis (strain 168) OX=224308 GN=yfiM PE=3 SV=1	Streptolysin S export transmembrane permease [Streptococcus pneumoniae]
gene154	0.32674	0.653481	0	0	-Inf	1	1	gi|111111111|ref|scaffold1.1|	145675	146217	-	542	gene154	GO:0008152;GO:0008080;GO:0016740;GO:0003824;GO:0016407;GO:0016746;GO:0016747;GO:0016410	K03790	ENOG4108VNQ	J	sp|P94482|YNAD_BACSU|Uncharacterized N-acetyltransferase YnaD OS=Bacillus subtilis (strain 168) OX=224308 GN=ynaD PE=3 SV=1	N-acetyltransferase [Bacillus stratosphericus] KOA76307.1 GCN5 family acetyltransferase [Bacillus stratosphericus]
gene1540	0.0167559	0.0335118	0	0	-Inf	1	1	gi|111111112|ref|scaffold2.1|	510823	511629	-	806	gene1540	GO:0006200;GO:0044710;GO:0008152;GO:0009987;GO:0044237;GO:0046434;GO:0009166;GO:0009167;GO:0044281;GO:0009161;GO:0046130;GO:1901360;GO:0009169;GO:0009199;GO:0042454;GO:0009207;GO:0009205;GO:0009203;GO:0046034;GO:0046128;GO:0046483;GO:0009164;GO:1901564;GO:1901565;GO:0034641;GO:0006163;GO:0019637;GO:0009141;GO:0009143;GO:0009144;GO:0009146;GO:0006807;GO:0006195;GO:1901575;GO:1901361;GO:0009150;GO:…	K01990	ENOG4105CJ1	V	sp|P94440|YFIL_BACSU|Uncharacterized ABC transporter ATP-binding protein YfiL OS=Bacillus subtilis (strain 168) OX=224308 GN=yfiL PE=3 SV=2	ABC transporter ATP-binding protein [Bacillus stratosphericus]
gene1541	55.9271	111.854	0	0	-Inf	1	1	gi|111111112|ref|scaffold2.1|	511977	513191	-	1214	gene1541	GO:0044710;GO:0008152;GO:0055114;GO:0016491;GO:0008270;GO:0043167;GO:0043169;GO:0046914;GO:0046872;GO:0003824;GO:0005488;GO:0016614;GO:0016616;GO:0004022	K00148	ENOG4105E2A	C	sp|Q45604|YYCR_BACSU|Uncharacterized zinc-type alcohol dehydrogenase-like protein YycR OS=Bacillus subtilis (strain 168) OX=224308 GN=yycR PE=3 SV=1	glutathione-independent formaldehyde dehydrogenase [Bacillus stratosphericus LAMA 585]
gene1542	0.0167559	0.0335118	0	0	-Inf	1	1	gi|111111112|ref|scaffold2.1|	513220	513420	+	200	gene1542	-	-	-	-	-	-
gene1543	0.314174	0.628347	0	0	-Inf	1	1	gi|111111112|ref|scaffold2.1|	513620	514195	-	575	gene1543	GO:0032259;GO:0008152;GO:0003824;GO:0016740;GO:0016741;GO:0008168	-	ENOG4108CCA	Q	sp|O05400|YRHH_BACSU|Putative methyltransferase YrhH OS=Bacillus subtilis (strain 168) OX=224308 GN=yrhH PE=2 SV=1	SAM-dependent methyltransferase [Bacillus altitudinis] OPW90688.1 SAM-dependent methyltransferase [Bacillus altitudinis]
gene1544	0.0209449	0.0418898	0	0	-Inf	1	1	gi|111111112|ref|scaffold2.1|	514490	514615	+	125	gene1544	-	-	-	-	-	hypothetical protein BACPU_15450 [Bacillus pumilus]
gene1545	1.51222	3.02444	0	0	-Inf	1	1	gi|111111112|ref|scaffold2.1|	514980	515114	-	134	gene1545	-	-	-	-	sp|O32027|YRZI_BACSU|Uncharacterized protein YrzI OS=Bacillus subtilis (strain 168) OX=224308 GN=yrzI PE=4 SV=1	YrzI family protein [Bacillus australimaris]
gene1546	0.00418898	0.00837796	0	0	-Inf	1	1	gi|111111112|ref|scaffold2.1|	515560	515856	-	296	gene1546	-	-	-	-	sp|O05395|YRHC_BACSU|Uncharacterized protein YrhC OS=Bacillus subtilis (strain 168) OX=224308 GN=yrhC PE=4 SV=1	Uncharacterised protein [Streptococcus pneumoniae]
gene1547	0.490111	0.980221	0	0	-Inf	1	1	gi|111111112|ref|scaffold2.1|	515863	517011	-	1148	gene1547	GO:0008152;GO:0009987;GO:0044237;GO:0006520;GO:0044281;GO:0044710;GO:0043436;GO:1901564;GO:0006807;GO:0006082;GO:0019752;GO:0071704;GO:0044238;GO:0000096;GO:1901605;GO:0006790;GO:0044283;GO:0044711;GO:0000097;GO:1901566;GO:0016053;GO:1901576;GO:0008652;GO:0044272;GO:0046394;GO:0044249;GO:1901607;GO:0009058;GO:0006575;GO:0071268;GO:0042398;GO:0050667;GO:0003824;GO:0005488;GO:0043168;GO:0043167;GO:…	K17217	ENOG4105C28	E	sp|O05394|MCCB_BACSU|Cystathionine gamma-lyase OS=Bacillus subtilis (strain 168) OX=224308 GN=mccB PE=1 SV=1	cystathionine gamma-synthase [Bacillus altitudinis] OPW90685.1 cystathionine gamma-synthase [Bacillus altitudinis]
gene1548	0.117291	0.234583	0	0	-Inf	1	1	gi|111111112|ref|scaffold2.1|	517013	517936	-	923	gene1548	GO:0019344;GO:0008152;GO:0019752;GO:0006807;GO:0044281;GO:0044710;GO:0006520;GO:0071704;GO:0044238;GO:0009987;GO:0043436;GO:1901564;GO:0006082;GO:0044237;GO:0044249;GO:0044283;GO:0009069;GO:1901576;GO:0044711;GO:1901605;GO:1901607;GO:0009058;GO:0009070;GO:0008652;GO:1901566;GO:0046394;GO:0016053;GO:0000096;GO:0000097;GO:0044272;GO:0006534;GO:0006790;GO:0006563;GO:0006535;GO:0003824;GO:0016829;GO:…	K17216	ENOG4105C6T	E	sp|O05393|MCCA_BACSU|O-acetylserine dependent cystathionine beta-synthase OS=Bacillus subtilis (strain 168) OX=224308 GN=mccA PE=1 SV=1	cysteine synthase [Streptococcus pneumoniae]
gene1549	0.733072	1.46614	0	0	-Inf	1	1	gi|111111112|ref|scaffold2.1|	517983	518654	-	671	gene1549	GO:0008152;GO:0044281;GO:0044283;GO:1901360;GO:0044710;GO:0044711;GO:0046483;GO:0000097;GO:0000096;GO:0043436;GO:1901564;GO:1901566;GO:0016053;GO:0071267;GO:0071265;GO:0006807;GO:0009067;GO:0009066;GO:1901576;GO:0008652;GO:0044272;GO:0046394;GO:0044249;GO:0034641;GO:0006139;GO:1901605;GO:1901607;GO:0009987;GO:0006725;GO:0055086;GO:0006082;GO:1901135;GO:0009086;GO:0019752;GO:0006520;GO:0071704;GO:…	K01243	ENOG4105DUF	F	sp|A8FFL1|MTNN_BACP2|5'-methylthioadenosine/S-adenosylhomocysteine nucleosidase OS=Bacillus pumilus (strain SAFR-032) OX=315750 GN=mtnN PE=3 SV=1	5'-methylthioadenosine/S-adenosylhomocysteine nucleosidase [Bacillus pumilus]
gene155	0.841985	1.68397	0	0	-Inf	1	1	gi|111111111|ref|scaffold1.1|	146383	146844	+	461	gene155	-	-	ENOG4108Z52	S	sp|Q6CHN5|POA1_YARLI|ADP-ribose 1''-phosphate phosphatase OS=Yarrowia lipolytica (strain CLIB 122 / E 150) OX=284591 GN=POA1 PE=3 SV=2	Appr-1-p processing protein [Bacillus stratosphericus] KOA76308.1 Appr-1-p processing protein [Bacillus stratosphericus]
gene1550	0.0418898	0.0837796	0	0	-Inf	1	1	gi|111111112|ref|scaffold2.1|	518694	519335	-	641	gene1550	GO:0032259;GO:0008152;GO:2001141;GO:0080090;GO:0019222;GO:0019219;GO:0031323;GO:2000112;GO:0051252;GO:0009889;GO:0050789;GO:0006355;GO:0010556;GO:0065007;GO:0051171;GO:0031326;GO:0060255;GO:0010468;GO:0050794;GO:0003824;GO:0016740;GO:0016741;GO:0008168;GO:0008757;GO:0003700;GO:0000166;GO:0036094;GO:0001071;GO:0097159;GO:1901363;GO:1901265;GO:0005488	K17462	ENOG4108WVK	K	sp|A8FFL2|Y2363_BACP2|Uncharacterized methyltransferase BPUM_2363 OS=Bacillus pumilus (strain SAFR-032) OX=315750 GN=yrrT PE=3 SV=1	SAM-dependent methyltransferase [Bacillus pumilus] AMM89785.1 SAM-dependent methyltransferase [Bacillus pumilus]
gene1551	0.0879686	0.175937	0	0	-Inf	1	1	gi|111111112|ref|scaffold2.1|	519478	519729	+	251	gene1551	-	-	ENOG410622V	S	sp|O32030|YRZA_BACSU|Uncharacterized protein YrzA OS=Bacillus subtilis (strain 168) OX=224308 GN=yrzA PE=4 SV=1	Protein of uncharacterised function (DUF2536) [Streptococcus pneumoniae]
gene1552	0.469166	0.938332	0	0	-Inf	1	1	gi|111111112|ref|scaffold2.1|	519866	520480	-	614	gene1552	-	-	ENOG4105SF2	S	sp|O32031|YRRS_BACSU|Uncharacterized membrane protein YrrS OS=Bacillus subtilis (strain 168) OX=224308 GN=yrrS PE=4 SV=1	membrane protein [Bacillus sp. UNC125MFCrub1.1]
gene1553	0.284851	0.569701	0	0	-Inf	1	1	gi|111111112|ref|scaffold2.1|	520599	522341	-	1742	gene1553	GO:0008152;GO:0044699;GO:0009987;GO:0044763;GO:0051301;GO:0043168;GO:1901681;GO:0033218;GO:0008658;GO:0031406;GO:0008144;GO:0005488;GO:0097159;GO:0033293;GO:0043167;GO:1901363;GO:0003824;GO:0016740;GO:0008955;GO:0016757;GO:0016758	K21468	ENOG4107XRG	M	sp|O32032|PBPI_BACSU|Penicillin-binding protein 4B OS=Bacillus subtilis (strain 168) OX=224308 GN=pbpI PE=2 SV=1	penicillin-binding protein [Bacillus pumilus] AKC66789.1 penicillin-binding protein [Bacillus pumilus]
gene1554	0.167559	0.335118	0	0	-Inf	1	1	gi|111111112|ref|scaffold2.1|	522392	522865	-	473	gene1554	GO:0019222;GO:0031326;GO:0031323;GO:0044249;GO:0034645;GO:1901576;GO:0050789;GO:0080090;GO:0032784;GO:0044260;GO:0071704;GO:2000112;GO:0060255;GO:0010467;GO:0065007;GO:0010468;GO:0019219;GO:0009987;GO:0009889;GO:0050794;GO:0009058;GO:0009059;GO:0051171;GO:0008152;GO:2001141;GO:0044238;GO:0051252;GO:0044237;GO:0043170;GO:0006355;GO:0010556;GO:0032774;GO:0090304;GO:0034641;GO:0006807;GO:1901362;GO:…	K03624	ENOG4108UKH	K	sp|A8FFL6|GREA_BACP2|Transcription elongation factor GreA OS=Bacillus pumilus (strain SAFR-032) OX=315750 GN=greA PE=3 SV=1	transcription elongation factor GreA [Bacillus pumilus] EDW20524.1 transcription elongation factor GreA (Transcript cleavage factor greA)(General stress protein 20M) (GSP20M) [Bacillus pumilus ATCC 7061] KIL23848.1 hypothetical protein B4127_2781 [Bacillus pumilus] KMY21775.1 transcription elongation factor GreA [Bacillus pumilus] OBS84826.1 transcription elongation factor GreA [Bacillus pumilus]
gene1557	1.00536	2.01071	0	0	-Inf	1	1	gi|111111112|ref|scaffold2.1|	525445	526374	-	929	gene1557	GO:0044238;GO:0019538;GO:0043170;GO:0071704;GO:0008152;GO:0006508;GO:0016787;GO:0003824;GO:0008233	K08303	ENOG4105XYU	O	sp|O32035|YRRN_BACSU|Uncharacterized protease YrrN OS=Bacillus subtilis (strain 168) OX=224308 GN=yrrN PE=3 SV=1	peptidase U32 [Bacillus altitudinis] KWZ65276.1 peptidase U32 [Bacillus altitudinis]
gene1558	0.841985	1.68397	0	0	-Inf	1	1	gi|111111112|ref|scaffold2.1|	526371	527036	-	665	gene1558	GO:0008152;GO:0032259;GO:0008171;GO:0016741;GO:0003824;GO:0016740;GO:0008168;GO:0008757;GO:0042409	-	ENOG4108VQJ	S	sp|O32036|YRRM_BACSU|Putative O-methyltransferase YrrM OS=Bacillus subtilis (strain 168) OX=224308 GN=yrrM PE=3 SV=1	acyl- o-methyltransferase [Bacillus stratosphericus] EMI12397.1 acyl- o-methyltransferase [Bacillus stratosphericus LAMA 585]
gene1559	2.51339	5.02678	0	0	-Inf	1	1	gi|111111112|ref|scaffold2.1|	527249	528289	-	1040	gene1559	GO:0008152;GO:0003676;GO:0005488;GO:1901363;GO:0097159;GO:0003824;GO:0016829	K07082	ENOG4105HHA	F	sp|O34758|MLTG_BACSU|Endolytic murein transglycosylase OS=Bacillus subtilis (strain 168) OX=224308 GN=mltG PE=3 SV=1	hypothetical protein [Bacillus pumilus] AKU33132.1 hypothetical protein ID12_17495 [Bacillus pumilus]
gene156	1.83477	3.66955	0	0	-Inf	1	1	gi|111111111|ref|scaffold1.1|	146914	147396	-	482	gene156	-	-	ENOG41063G6	S	sp|C0H3X4|YEZG_BACSU|Probable antitoxin YezG OS=Bacillus subtilis (strain 168) OX=224308 GN=yezG PE=1 SV=1	TIGR01741 family protein [Bacillus altitudinis] OPW89434.1 hypothetical protein BG911_17685 [Bacillus altitudinis]
gene1560	0.20526	0.41052	0	0	-Inf	1	1	gi|111111112|ref|scaffold2.1|	528405	529439	-	1034	gene1560	GO:0008152;GO:0009987;GO:0044710;GO:0071704;GO:0044237;GO:0044281;GO:0043436;GO:0006082;GO:0019752;GO:0032787;GO:0044248;GO:0009056;GO:0044282;GO:0044712;GO:0072329;GO:0016054;GO:1901575;GO:0046395;GO:0044238;GO:0006629;GO:0006631;GO:0044255;GO:0055114;GO:0009062;GO:0016042;GO:0044242;GO:0034440;GO:0019395;GO:0006635;GO:0030258;GO:0006725;GO:1901360;GO:0019439;GO:1901361;GO:0042537;GO:0019336;GO:…	K00626	ENOG4105CHU	I	sp|O07618|YHFS_BACSU|Putative acetyl-CoA C-acetyltransferase YhfS OS=Bacillus subtilis (strain 168) OX=224308 GN=yhfS PE=2 SV=1	acetyl-CoA acetyltransferase [Bacillus altitudinis] OPW95223.1 acetyl-CoA acetyltransferase [Bacillus altitudinis]
gene1561	0.397953	0.795906	0	0	-Inf	1	1	gi|111111112|ref|scaffold2.1|	529481	530938	-	1457	gene1561	GO:0008152;GO:0001676;GO:0044238;GO:0006631;GO:0006629;GO:0006082;GO:0071704;GO:0009987;GO:0044710;GO:0019752;GO:0032787;GO:0043436;GO:0044237;GO:0044255;GO:0044281;GO:0003824;GO:0016874;GO:0016877;GO:0015645;GO:0004467;GO:0008756;GO:0016878;GO:0016405	K01897	ENOG4107F3J	Q	sp|O07619|YHFT_BACSU|Uncharacterized acyl--CoA ligase YhfT OS=Bacillus subtilis (strain 168) OX=224308 GN=yhfT PE=2 SV=1	acyl-CoA synthetase [Bacillus stratosphericus]
gene1562	0.12148	0.242961	0	0	-Inf	1	1	gi|111111112|ref|scaffold2.1|	530938	531486	-	548	gene1562	GO:0071705;GO:0042886;GO:0015718;GO:0015878;GO:0015849;GO:0006811;GO:0006810;GO:0072348;GO:0015711;GO:0044765;GO:0051180;GO:0006820;GO:0071702;GO:0051181;GO:0051234;GO:0051179;GO:0044699;GO:0046942;GO:0051184;GO:0015225;GO:0051183;GO:0005215;GO:0016020;GO:0044464;GO:0005623;GO:0071944;GO:0005886	K03523	ENOG4107ZYJ	S	sp|O07620|BIOY_BACSU|Probable biotin transporter BioY OS=Bacillus subtilis (strain 168) OX=224308 GN=bioY PE=2 SV=1	biotin transporter BioY [Bacillus altitudinis] KDE31421.1 hypothetical protein BA79_06491 [Bacillus altitudinis 41KF2b]
gene1563	0.0879686	0.175937	0	0	-Inf	1	1	gi|111111112|ref|scaffold2.1|	531661	531945	-	284	gene1563	-	-	ENOG4105VPH	S	sp|A8FFM6|Y2377_BACP2|UPF0473 protein BPUM_2377 OS=Bacillus pumilus (strain SAFR-032) OX=315750 GN=BPUM_2377 PE=3 SV=1	DUF1292 domain-containing protein [Bacillus sp. M 2-6] EIL86244.1 yrzB [Bacillus sp. M 2-6]
gene1564	1.18129	2.36258	0	0	-Inf	1	1	gi|111111112|ref|scaffold2.1|	531961	532377	-	416	gene1564	GO:0090305;GO:0090304;GO:0034641;GO:0006807;GO:0044699;GO:0006139;GO:0051716;GO:0044260;GO:0071704;GO:1901360;GO:0006281;GO:0009987;GO:0006725;GO:0006974;GO:0006950;GO:0044763;GO:0008152;GO:0046483;GO:0006310;GO:0044238;GO:0050896;GO:0044237;GO:0043170;GO:0033554;GO:0006259;GO:0016787;GO:0004518;GO:0097159;GO:0016788;GO:0003824;GO:0005488;GO:0003676;GO:1901363;GO:0005737;GO:0044424;GO:0044464;GO:…	K07447	ENOG4108Z08	L	sp|A8FFM7|YQGF_BACP2|Putative pre-16S rRNA nuclease OS=Bacillus pumilus (strain SAFR-032) OX=315750 GN=BPUM_2378 PE=3 SV=1	Holliday junction resolvase RuvX [Bacillus sp. RRD69] SIT91920.1 putative holliday junction resolvase [Bacillus sp. RRD69]
gene1565	2.60555	5.21109	0	0	-Inf	1	1	gi|111111112|ref|scaffold2.1|	532381	532626	-	245	gene1565	-	-	ENOG4105VBH	S	sp|A8FFM8|Y2379_BACP2|UPF0297 protein BPUM_2379 OS=Bacillus pumilus (strain SAFR-032) OX=315750 GN=BPUM_2379 PE=3 SV=2	hypothetical protein BAME_06200 [Bacillus sp. M 2-6] KIL28758.1 hypothetical protein B4133_2625 [Bacillus pumilus]
gene1566	7.7161	15.4322	0	0	-Inf	1	1	gi|111111112|ref|scaffold2.1|	532737	535373	-	2636	gene1566	GO:0019752;GO:0090304;GO:0044249;GO:0034641;GO:0006807;GO:0044281;GO:0034645;GO:0034660;GO:1901360;GO:0006139;GO:0044710;GO:0044260;GO:0006520;GO:0071704;GO:0010467;GO:0044267;GO:0009987;GO:0006725;GO:0009058;GO:0009059;GO:0008152;GO:0043436;GO:0046483;GO:0016070;GO:0044238;GO:1901564;GO:0006082;GO:0019538;GO:0044237;GO:0043170;GO:0006399;GO:0043038;GO:0043039;GO:0006419;GO:0006418;GO:1901576;GO:…	K01872	ENOG4105CIM	J	sp|A8FFM9|SYA_BACP2|Alanine--tRNA ligase OS=Bacillus pumilus (strain SAFR-032) OX=315750 GN=alaS PE=3 SV=1	alanine--tRNA ligase [Bacillus pumilus] AKC66799.1 alanine--tRNA ligase [Bacillus pumilus] ANT57409.1 alanine--tRNA ligase [Bacillus pumilus]
gene1567	0.00418898	0.00837796	0	0	-Inf	1	1	gi|111111112|ref|scaffold2.1|	535704	536672	-	968	gene1567	-	-	ENOG4105C02	P	sp|O34472|YRRI_BACSU|Putative transport protein YrrI OS=Bacillus subtilis (strain 168) OX=224308 GN=yrrI PE=3 SV=1	AI-2E family transporter [Bacillus sp. RRD69] SIT91939.1 Predicted PurR-regulated permease PerM [Bacillus sp. RRD69]
gene1568	0.00418898	0.00837796	0	0	-Inf	1	1	gi|111111112|ref|scaffold2.1|	536994	537722	+	728	gene1568	GO:0006200;GO:0046434;GO:0009166;GO:0009167;GO:0044281;GO:0009161;GO:0046130;GO:1901360;GO:0009169;GO:0044710;GO:0009199;GO:0042454;GO:0009207;GO:0009205;GO:0009203;GO:0046034;GO:0046128;GO:0046483;GO:0009164;GO:1901564;GO:1901565;GO:0034641;GO:0006163;GO:0019637;GO:0009141;GO:0009143;GO:0009144;GO:0009146;GO:0006807;GO:0006195;GO:1901575;GO:1901361;GO:0009150;GO:0009154;GO:0009158;GO:0046700;GO:…	K10041	ENOG4105CDA	E	sp|O34677|GLNQ_BACSU|Glutamine transport ATP-binding protein GlnQ OS=Bacillus subtilis (strain 168) OX=224308 GN=glnQ PE=2 SV=1	amino acid ABC transporter ATP-binding protein [Bacillus sp. M 2-6] EIL86249.1 glutamine transport ATP-binding protein GlnQ [Bacillus sp. M 2-6]
gene1569	0.00837796	0.0167559	0	0	-Inf	1	1	gi|111111112|ref|scaffold2.1|	537737	538546	+	809	gene1569	GO:0006810;GO:0051234;GO:0051179;GO:0005215;GO:0005623;GO:0044464;GO:0071944;GO:0044462;GO:0030313;GO:0031975;GO:0042597;GO:0030288;GO:0030312	K10039	ENOG4105CT1	T	sp|O34563|GLNH_BACSU|ABC transporter glutamine-binding protein GlnH OS=Bacillus subtilis (strain 168) OX=224308 GN=glnH PE=2 SV=1	amino acid abc amino acid-binding protein [Bacillus stratosphericus LAMA 585]
gene157	5.475	10.95	0	0	-Inf	1	1	gi|111111111|ref|scaffold1.1|	147402	149327	-	1925	gene157	-	-	ENOG4106DW5	S	sp|O31506|YEEF_BACSU|Putative ribonuclease YeeF OS=Bacillus subtilis (strain 168) OX=224308 GN=yeeF PE=1 SV=2	DNA-binding protein [Bacillus sp. RRD69] SIT79799.1 Predicted ribonuclease, toxin component of the YeeF-YezG toxin-antitoxin module [Bacillus sp. RRD69]
gene1571	0.0125669	0.0251339	0	0	-Inf	1	1	gi|111111112|ref|scaffold2.1|	539296	539946	+	650	gene1571	GO:0006810;GO:0051234;GO:0051179;GO:0005215;GO:0016020;GO:0044464;GO:0005623;GO:0071944;GO:0005886;GO:0016021;GO:0044425;GO:0031224	K10040	ENOG4105DRP	E	sp|O34606|GLNP_BACSU|Probable glutamine ABC transporter permease protein GlnP OS=Bacillus subtilis (strain 168) OX=224308 GN=glnP PE=2 SV=1	amino acid ABC transporter permease [Bacillus stratosphericus] KMK99333.1 glutamine ABC transporter permease [Bacillus stratosphericus] KML48881.1 glutamine ABC transporter permease [Bacillus stratosphericus]
gene1572	0.276473	0.552945	0	0	-Inf	1	1	gi|111111112|ref|scaffold2.1|	540342	540536	-	194	gene1572	-	-	-	-	sp|O34402|YRRD_BACSU|Uncharacterized protein YrrD OS=Bacillus subtilis (strain 168) OX=224308 GN=yrrD PE=4 SV=1	prc-barrel domain-containing protein [Bacillus pumilus] AMB90531.1 prc-barrel domain-containing protein [Bacillus pumilus]
gene1573	2.72703	5.45405	0	0	-Inf	1	1	gi|111111112|ref|scaffold2.1|	540891	543254	-	2363	gene1573	GO:0008152;GO:0090304;GO:0034641;GO:0006807;GO:0006139;GO:0071704;GO:1901360;GO:0009987;GO:0006725;GO:0046483;GO:0044238;GO:0044237;GO:0043170;GO:0044699;GO:0051716;GO:0044260;GO:0006281;GO:0006974;GO:0006950;GO:0044763;GO:0050896;GO:0033554;GO:0006259;GO:0090305;GO:0016787;GO:0003824;GO:0017111;GO:0016462;GO:0016818;GO:0016817;GO:0005488;GO:1901363;GO:0097159;GO:1901265;GO:0000166;GO:0036094;GO:…	K03581	ENOG4105C7H	L	sp|O34481|RECDL_BACSU|ATP-dependent RecD-like DNA helicase OS=Bacillus subtilis (strain 168) OX=224308 GN=yrrC PE=3 SV=1	ATP-dependent RecD-like DNA helicase [Bacillus altitudinis] OJT62470.1 hypothetical protein BFP48_05665 [Bacillus altitudinis]
gene1574	0.749827	1.49965	0	0	-Inf	1	1	gi|111111112|ref|scaffold2.1|	543295	543948	-	653	gene1574	-	-	ENOG4107XQ4	S	sp|O34452|YRRB_BACSU|TPR repeat-containing protein YrrB OS=Bacillus subtilis (strain 168) OX=224308 GN=yrrB PE=1 SV=1	hypothetical protein [Bacillus sp. L_1B0_12] KKK09842.1 hypothetical protein UF15_09615 [Bacillus sp. L_1B0_12]
gene1575	4.08007	8.16013	0	0	-Inf	1	1	gi|111111112|ref|scaffold2.1|	544010	545134	-	1124	gene1575	GO:0008033;GO:0008152;GO:0090304;GO:0034641;GO:0006807;GO:0034660;GO:1901360;GO:0034470;GO:0006139;GO:0044260;GO:0071704;GO:0010467;GO:0009987;GO:0006725;GO:0046483;GO:0016070;GO:0044238;GO:0044237;GO:0043170;GO:0006399;GO:0006396;GO:0009451;GO:0006400;GO:0043412;GO:0032259;GO:0016740;GO:0003824;GO:0016782;GO:0016783;GO:0035639;GO:0005488;GO:0003676;GO:0000166;GO:1901363;GO:0001883;GO:0001882;GO:…	K00566	ENOG4105CCJ	J	sp|A8FFP0|MNMA_BACP2|tRNA-specific 2-thiouridylase MnmA OS=Bacillus pumilus (strain SAFR-032) OX=315750 GN=mnmA PE=3 SV=1	tRNA 2-thiouridine(34) synthase MnmA [Bacillus pumilus]
gene1576	7.02073	14.0415	0	0	-Inf	1	1	gi|111111112|ref|scaffold2.1|	545223	546365	-	1142	gene1576	GO:0008152;GO:0044710;GO:0009987;GO:0044237;GO:0006807;GO:0071704;GO:0044238;GO:0019752;GO:0044281;GO:0006520;GO:0043436;GO:1901564;GO:0006082;GO:0009069;GO:1901605;GO:0000096;GO:0006534;GO:0006790;GO:0003824;GO:0005488;GO:0043167;GO:0030170;GO:0043168;GO:0048037;GO:0016740;GO:0031071;GO:0016782;GO:0016783;GO:0008483;GO:0016769;GO:0016829	K04487	ENOG4105C3J	E	sp|O34599|ISCS1_BACSU|Putative cysteine desulfurase IscS 1 OS=Bacillus subtilis (strain 168) OX=224308 GN=iscS1 PE=3 SV=2	cysteine desulfurase [Bacillus altitudinis] KWZ65295.1 cysteine desulfurase NifS [Bacillus altitudinis]
gene1577	0.351874	0.703749	0	0	-Inf	1	1	gi|111111112|ref|scaffold2.1|	546384	546764	-	380	gene1577	GO:0019222;GO:0031326;GO:0031323;GO:0050789;GO:0080090;GO:2000112;GO:0060255;GO:0065007;GO:0010468;GO:0019219;GO:0009889;GO:0050794;GO:0051171;GO:2001141;GO:0051252;GO:0006355;GO:0010556;GO:0009987;GO:0008152;GO:0044237;GO:0032774;GO:0090304;GO:0044249;GO:0034641;GO:0006807;GO:0034645;GO:1901362;GO:1901360;GO:0006139;GO:0044260;GO:0071704;GO:0010467;GO:0018130;GO:1901576;GO:0006725;GO:0009058;GO:…	K17472	ENOG4108ZF1	K	sp|O34527|CYMR_BACSU|HTH-type transcriptional regulator CymR OS=Bacillus subtilis (strain 168) OX=224308 GN=cymR PE=1 SV=2	transcriptional regulator of cysteine biosynthesis [Bacillus stratosphericus LAMA 585]
gene1578	3.77846	7.55692	0	0	-Inf	1	1	gi|111111112|ref|scaffold2.1|	547011	548276	+	1265	gene1578	GO:0008152;GO:0009987;GO:0044237;GO:1901360;GO:0046483;GO:0006807;GO:0034641;GO:0006139;GO:0006725;GO:0071704;GO:0044238;GO:0043170;GO:0090304;GO:0044260;GO:0006310;GO:0006259;GO:0051716;GO:0032392;GO:0006281;GO:0033554;GO:0071103;GO:0006950;GO:0050896;GO:0044699;GO:0032508;GO:0006974;GO:0044763;GO:0000166;GO:0017111;GO:0016787;GO:0003824;GO:0016818;GO:0016817;GO:0016462;GO:0005488;GO:1901363;GO:…	K07478	ENOG4105D1H	L	sp|O34528|YRVN_BACSU|Uncharacterized AAA domain-containing protein YrvN OS=Bacillus subtilis (strain 168) OX=224308 GN=yrvN PE=3 SV=1	recombinase RarA [Bacillus pumilus] ALM28504.1 recombinase RarA [Bacillus pumilus] ALM45042.1 recombinase RarA [Bacillus pumilus] ANY96522.1 recombinase RarA [Bacillus pumilus]
gene1579	3.3847	6.76939	0	0	-Inf	1	1	gi|111111112|ref|scaffold2.1|	548309	548833	-	524	gene1579	GO:0008152;GO:0003824	K22132	ENOG4107Y9S	H	sp|O32037|TCDA_BACSU|tRNA threonylcarbamoyladenosine dehydratase OS=Bacillus subtilis (strain 168) OX=224308 GN=tcdA PE=3 SV=3	HesA/MoeB/ThiF family protein [Streptococcus pneumoniae]
gene158	0.255528	0.511056	0	0	-Inf	1	1	gi|111111111|ref|scaffold1.1|	149511	150389	-	878	gene158	-	-	-	-	-	hypothetical protein [Bacillus sp. RRD69] SIT79810.1 hypothetical protein SAMN05216491_1206 [Bacillus sp. RRD69]
gene1581	4.18479	8.36958	0	0	-Inf	1	1	gi|111111112|ref|scaffold2.1|	551221	552519	-	1298	gene1581	GO:0006418;GO:0008152;GO:0019752;GO:0090304;GO:0044249;GO:0034641;GO:0006807;GO:0044281;GO:0034645;GO:0034660;GO:1901360;GO:0006139;GO:0044710;GO:0044260;GO:0006520;GO:0071704;GO:0010467;GO:0044267;GO:0009987;GO:0006725;GO:0009058;GO:0009059;GO:0043436;GO:0046483;GO:0016070;GO:0044238;GO:1901564;GO:0006082;GO:0019538;GO:0044237;GO:0043170;GO:0006399;GO:0043038;GO:0043039;GO:1901576;GO:0006412;GO:…	K01892	ENOG4105CUT	J	sp|O32039|SYH_BACSU|Histidine--tRNA ligase OS=Bacillus subtilis (strain 168) OX=224308 GN=hisS PE=3 SV=1	histidyl-trna synthetase [Bacillus stratosphericus LAMA 585]
gene1582	0.20526	0.41052	0	0	-Inf	1	1	gi|111111112|ref|scaffold2.1|	552867	553037	-	170	gene1582	-	-	-	-	-	hypothetical protein BPUM_2398 [Bacillus pumilus SAFR-032] EDW20525.1 conserved hypothetical protein [Bacillus pumilus ATCC 7061] EIL86265.1 hypothetical protein BAME_06390 [Bacillus sp. M 2-6] EKF34314.1 hypothetical protein BA1_15806 [Bacillus xiamenensis] KDE29146.1 hypothetical protein BA81_01600 [Bacillus safensis FO-36b] KDE31443.1 hypothetical protein BA79_06601 [Bacillus altitudinis 41KF2…
gene1583	6.25834	12.5167	0	0	-Inf	1	1	gi|111111112|ref|scaffold2.1|	553247	554755	+	1508	gene1583	GO:0008152;GO:0071704;GO:0043170;GO:0009056;GO:1901564;GO:1901565;GO:0030203;GO:0006807;GO:1901575;GO:0006022;GO:0006026;GO:0006027;GO:0009253;GO:1901136;GO:1901135;GO:0000270;GO:0009057;GO:0009987;GO:0044699;GO:0044763;GO:0071840;GO:0071554;GO:0044260;GO:0044237;GO:0044036;GO:0016998;GO:0044248;GO:0008745;GO:0016787;GO:0003824;GO:0016810;GO:0016811	K01448	ENOG4105C5C	M	sp|O32041|YRVJ_BACSU|Putative N-acetylmuramoyl-L-alanine amidase YrvJ OS=Bacillus subtilis (strain 168) OX=224308 GN=yrvJ PE=3 SV=1	N-acetylmuramoyl-L-alanine amidase [Bacillus stratosphericus] KOA77153.1 N-acetylmuramoyl-L-alanine amidase [Bacillus stratosphericus]
gene1584	1.49128	2.98255	0	0	-Inf	1	1	gi|111111112|ref|scaffold2.1|	554849	555292	-	443	gene1584	GO:0008152;GO:0006807;GO:0071704;GO:0009987;GO:0044238;GO:0044237;GO:0019752;GO:0009063;GO:0044281;GO:0044282;GO:0044712;GO:0044710;GO:0006520;GO:1901605;GO:1901606;GO:1901575;GO:0043436;GO:0009056;GO:0044248;GO:1901565;GO:1901564;GO:0019478;GO:0006082;GO:0046395;GO:0016054;GO:0046416;GO:0016787;GO:0016788;GO:0003824;GO:0005737;GO:0044424;GO:0044464;GO:0005623;GO:0005622	K07560	ENOG4108YYA	J	sp|A8FFP8|DTD_BACP2|D-aminoacyl-tRNA deacylase OS=Bacillus pumilus (strain SAFR-032) OX=315750 GN=dtd PE=3 SV=1	D-tyrosyl-tRNA(Tyr) deacylase [Bacillus altitudinis] OJT62479.1 D-tyrosyl-tRNA(Tyr) deacylase [Bacillus altitudinis]
gene1586	1.79707	3.59414	0	0	-Inf	1	1	gi|111111112|ref|scaffold2.1|	557664	558176	-	512	gene1586	GO:0044237;GO:0055086;GO:0034641;GO:0006807;GO:0006139;GO:0044710;GO:1901360;GO:0071704;GO:0009987;GO:0006725;GO:0008152;GO:1901564;GO:0046483;GO:0044238;GO:0044281;GO:0009116;GO:1901135;GO:1901657;GO:0072522;GO:1901362;GO:0072521;GO:0043101;GO:0018130;GO:1901576;GO:0009058;GO:0034654;GO:0043094;GO:0044271;GO:1901566;GO:0019438;GO:0044249;GO:0046112;GO:0046083;GO:0042440;GO:0046084;GO:0009113;GO:…	K00759	ENOG4109003	F	sp|A8FFQ0|APT_BACP2|Adenine phosphoribosyltransferase OS=Bacillus pumilus (strain SAFR-032) OX=315750 GN=apt PE=3 SV=1	adenine phosphoribosyltransferase [Bacillus stratosphericus LAMA 585]
gene1587	10.4976	20.9952	0	0	-Inf	1	1	gi|111111112|ref|scaffold2.1|	558200	560533	-	2333	gene1587	GO:0008152;GO:0090305;GO:1901360;GO:0046483;GO:0006807;GO:0034641;GO:0006139;GO:0009987;GO:0006725;GO:0043170;GO:0090304;GO:0044237;GO:0071704;GO:0044238;GO:0044260;GO:0006259;GO:0051716;GO:0006281;GO:0033554;GO:0006950;GO:0050896;GO:0044699;GO:0006974;GO:0044763;GO:0006310;GO:0005488;GO:0016787;GO:0003824;GO:0043169;GO:0046914;GO:0043167;GO:0046872;GO:0030145;GO:0004527;GO:0016788;GO:0004518;GO:…	K07462	ENOG4105C2R	L	sp|O32044|RECJ_BACSU|Single-stranded-DNA-specific exonuclease RecJ OS=Bacillus subtilis (strain 168) OX=224308 GN=recJ PE=3 SV=1	single-stranded-DNA-specific exonuclease RecJ [Bacillus pumilus] AKC66819.1 recombinase RecJ [Bacillus pumilus]
gene1588	2.54271	5.08542	0	0	-Inf	1	1	gi|111111112|ref|scaffold2.1|	560615	560971	-	356	gene1588	-	K08992	ENOG41067VP	S	sp|O32045|YRVD_BACSU|Uncharacterized protein YrvD OS=Bacillus subtilis (strain 168) OX=224308 GN=yrvD PE=4 SV=1	hypothetical protein [Bacillus altitudinis] OJT62483.1 hypothetical protein BFP48_05740 [Bacillus altitudinis]
gene1589	0.356063	0.712127	0	0	-Inf	1	1	gi|111111112|ref|scaffold2.1|	561071	561691	-	620	gene1589	GO:0044699;GO:0051179;GO:0015672;GO:0006810;GO:0006813;GO:0006812;GO:0006811;GO:0009987;GO:0034220;GO:0044765;GO:0030001;GO:0051234;GO:0055085;GO:0044763;GO:0022891;GO:0022892;GO:0005215;GO:0008324;GO:0015075;GO:0022857	K07228	ENOG4105NCW	P	sp|O32046|YRVC_BACSU|Uncharacterized protein YrvC OS=Bacillus subtilis (strain 168) OX=224308 GN=yrvC PE=4 SV=1	hypothetical protein C883_2856 [Bacillus stratosphericus LAMA 585]
gene159	0.00418898	0.00837796	0	0	-Inf	1	1	gi|111111111|ref|scaffold1.1|	150759	150956	+	197	gene159	-	-	-	-	-	-
gene1591	0.0963465	0.192693	0	0	-Inf	1	1	gi|111111112|ref|scaffold2.1|	564030	564158	-	128	gene1591	-	-	ENOG41069ID	S	sp|O32049|COMN_BACSU|Post-transcriptional regulator ComN OS=Bacillus subtilis (strain 168) OX=224308 GN=comN PE=1 SV=1	competence protein ComN [Bacillus safensis] OUL00730.1 competence protein ComN [Bacillus safensis]
gene1592	0.0628347	0.125669	0	0	-Inf	1	1	gi|111111112|ref|scaffold2.1|	564404	565993	+	1589	gene1592	GO:0043170;GO:1901576;GO:0071704;GO:0000271;GO:0009058;GO:0009059;GO:0008152;GO:0044723;GO:0044238;GO:0005975;GO:0005976;GO:0016051;GO:0016020	K06409	ENOG4105CKP	M	sp|Q00758|SP5B_BACSU|Stage V sporulation protein B OS=Bacillus subtilis (strain 168) OX=224308 GN=spoVB PE=2 SV=1	stage v sporulation protein b [Bacillus stratosphericus LAMA 585]
gene1593	0.0125669	0.0251339	0	0	-Inf	1	1	gi|111111112|ref|scaffold2.1|	565995	566684	-	689	gene1593	-	-	ENOG4108QG2	S	sp|O32050|YRBG_BACSU|UPF0702 transmembrane protein YrbG OS=Bacillus subtilis (strain 168) OX=224308 GN=yrbG PE=3 SV=1	membrane protein [Bacillus stratosphericus LAMA 585]
gene1594	0.00418898	0.00837796	0	0	-Inf	1	1	gi|111111112|ref|scaffold2.1|	566822	567199	+	377	gene1594	GO:0016020;GO:0016021;GO:0044464;GO:0005623;GO:0071944;GO:0005886;GO:0044425;GO:0031224	-	ENOG4105NAP	S	sp|O32051|YRZE_BACSU|Uncharacterized membrane protein YrzE OS=Bacillus subtilis (strain 168) OX=224308 GN=yrzE PE=4 SV=1	TIGR04086 family membrane protein [Bacillus xiamenensis] EKF34237.1 hypothetical protein BA1_16071 [Bacillus xiamenensis] AOZ89870.1 hypothetical protein BK049_14935 [Bacillus xiamenensis]
gene1595	0.209449	0.418898	0	0	-Inf	1	1	gi|111111112|ref|scaffold2.1|	567249	567515	-	266	gene1595	-	K03210	ENOG4105VIE	U	sp|O32052|YRBF_BACSU|Sec translocon accessory complex subunit YrbF OS=Bacillus subtilis (strain 168) OX=224308 GN=yrbF PE=3 SV=1	hypothetical protein BACPU_14920 [Bacillus pumilus]
gene1596	3.66117	7.32234	0	0	-Inf	1	1	gi|111111112|ref|scaffold2.1|	567563	568600	-	1037	gene1596	GO:0009451;GO:0090304;GO:0034641;GO:0006807;GO:0034660;GO:0034470;GO:1901360;GO:0006139;GO:0044260;GO:0071704;GO:0010467;GO:0006400;GO:0008033;GO:0009987;GO:0006725;GO:0008152;GO:0046483;GO:0016070;GO:0044238;GO:0043412;GO:0044237;GO:0043170;GO:0006399;GO:0006396;GO:0044249;GO:0009163;GO:0046116;GO:0044710;GO:1901564;GO:1901657;GO:1901362;GO:0055086;GO:0018130;GO:1901576;GO:0009058;GO:0009116;GO:…	K00773	ENOG4105C6U	J	sp|A8FFQ9|TGT_BACP2|Queuine tRNA-ribosyltransferase OS=Bacillus pumilus (strain SAFR-032) OX=315750 GN=tgt PE=3 SV=1	tRNA-guanine(34) transglycosylase [Bacillus pumilus] BAT49573.1 queuine tRNA-ribosyltransferase [Bacillus pumilus] APP16298.1 tRNA guanosine(34) transglycosylase Tgt [Bacillus pumilus]
gene1597	4.39424	8.78848	0	0	-Inf	1	1	gi|111111112|ref|scaffold2.1|	568740	569768	-	1028	gene1597	GO:0008152;GO:0009451;GO:0090304;GO:0034641;GO:0006807;GO:0034660;GO:0034470;GO:1901360;GO:0006139;GO:0044260;GO:0071704;GO:0010467;GO:0006400;GO:0008033;GO:0009987;GO:0006725;GO:0046483;GO:0016070;GO:0044238;GO:0043412;GO:0044237;GO:0043170;GO:0006399;GO:0006396;GO:0044249;GO:0009163;GO:0046116;GO:0044710;GO:1901564;GO:1901657;GO:1901362;GO:0055086;GO:0018130;GO:1901576;GO:0009058;GO:0009116;GO:…	K07568	ENOG4105E2N	J	sp|A8FFR0|QUEA_BACP2|S-adenosylmethionine:tRNA ribosyltransferase-isomerase OS=Bacillus pumilus (strain SAFR-032) OX=315750 GN=queA PE=3 SV=1	tRNA preQ1(34) S-adenosylmethionine ribosyltransferase-isomerase QueA [Bacillus altitudinis] OPW95260.1 tRNA preQ1(34) S-adenosylmethionine ribosyltransferase-isomerase QueA [Bacillus altitudinis]
gene1598	0.00418898	0.00837796	0	0	-Inf	1	1	gi|111111112|ref|scaffold2.1|	569803	569979	-	176	gene1598	-	-	ENOG41061AI	S	sp|C0H463|YRZS_BACSU|Uncharacterized membrane protein YrzS OS=Bacillus subtilis (strain 168) OX=224308 GN=yrzS PE=4 SV=1	yrzs bacsu ame: full uncharacterized membrane protein [Bacillus stratosphericus LAMA 585]
gene1599	3.97953	7.95906	0	0	-Inf	1	1	gi|111111112|ref|scaffold2.1|	569996	571000	-	1004	gene1599	GO:0009987;GO:0090304;GO:0034641;GO:0006807;GO:0006139;GO:0044260;GO:0071704;GO:1901360;GO:0006725;GO:0008152;GO:0046483;GO:0044238;GO:0044237;GO:0043170;GO:0006259;GO:0044699;GO:0051716;GO:0006950;GO:0044763;GO:0050896;GO:0033554;GO:0071103;GO:0032392;GO:0006281;GO:0032508;GO:0006974;GO:0006310;GO:0009991;GO:0009432;GO:0071496;GO:0007154;GO:0031668;GO:0009605;GO:0009378;GO:0003678;GO:0016787;GO:…	K03551	ENOG4105CKJ	L	sp|A8FFR2|RUVB_BACP2|Holliday junction ATP-dependent DNA helicase RuvB OS=Bacillus pumilus (strain SAFR-032) OX=315750 GN=ruvB PE=3 SV=1	Holliday junction branch migration DNA helicase RuvB [Bacillus sp. L_1B0_12] KKK09865.1 ATP-dependent DNA helicase RuvB [Bacillus sp. L_1B0_12]
gene16	0.0209449	0.0418898	0	0	-Inf	1	1	gi|111111111|ref|scaffold1.1|	17738	18223	-	485	gene16	GO:0008152;GO:0003824;GO:0016853	-	ENOG41090U3	S	sp|O34882|YOLI_BACSU|Probable tautomerase YolI OS=Bacillus subtilis (strain 168) OX=224308 GN=yolI PE=3 SV=1	tautomerase [Bacillus stratosphericus LAMA 585]
gene160	0.0125669	0.0251339	0	0	-Inf	1	1	gi|111111111|ref|scaffold1.1|	150951	151286	-	335	gene160	-	-	-	-	-	hypothetical protein [Bacillus sp. RRD69] SIT79833.1 hypothetical protein SAMN05216491_1208 [Bacillus sp. RRD69]
gene1600	0.213638	0.427276	0	0	-Inf	1	1	gi|111111112|ref|scaffold2.1|	571012	571653	-	641	gene1600	GO:0032508;GO:0009987;GO:0090304;GO:0034641;GO:0006807;GO:0006139;GO:0044260;GO:0071704;GO:1901360;GO:0006725;GO:0008152;GO:0046483;GO:0044238;GO:0044237;GO:0043170;GO:0006259;GO:0044699;GO:0051716;GO:0006950;GO:0044763;GO:0050896;GO:0033554;GO:0071103;GO:0032392;GO:0006281;GO:0006974;GO:0006310;GO:0009991;GO:0009432;GO:0071496;GO:0007154;GO:0031668;GO:0009605;GO:0009378;GO:0003678;GO:0016787;GO:…	K03550	ENOG4105KA4	L	sp|A8FFR3|RUVA_BACP2|Holliday junction ATP-dependent DNA helicase RuvA OS=Bacillus pumilus (strain SAFR-032) OX=315750 GN=ruvA PE=3 SV=1	holliday junction DNA helicase RuvA [Bacillus sp. M 2-6] EMI12437.1 holliday junction dna helicase [Bacillus stratosphericus LAMA 585] KIL28796.1 hypothetical protein B4133_2663 [Bacillus pumilus]
gene1601	0.0544567	0.108913	0	0	-Inf	1	1	gi|111111112|ref|scaffold2.1|	571765	572238	-	473	gene1601	-	K06318	ENOG4106H85	S	sp|O05391|BOFC_BACSU|Protein BofC OS=Bacillus subtilis (strain 168) OX=224308 GN=bofC PE=1 SV=1	bypass of forespore intercompartmental signaling factor [Bacillus stratosphericus LAMA 585]
gene1602	1.11008	2.22016	0	0	-Inf	1	1	gi|111111112|ref|scaffold2.1|	572444	573148	+	704	gene1602	GO:0008152;GO:0044260;GO:0071704;GO:0009987;GO:0044238;GO:0044237;GO:0043170;GO:0016310;GO:0044267;GO:0006468;GO:0006464;GO:0043412;GO:0036211;GO:0019538;GO:0006796;GO:0006793;GO:0016740;GO:0003824;GO:0016772;GO:0004672;GO:0016301;GO:0016773;GO:0035639;GO:0005488;GO:0000166;GO:1901363;GO:0001883;GO:0001882;GO:0043168;GO:0043167;GO:1901265;GO:0032549;GO:0017076;GO:0005524;GO:0036094;GO:0030554;GO:…	-	ENOG4105ZM5	T	sp|O32057|YRZF_BACSU|Putative serine/threonine-protein kinase YrzF OS=Bacillus subtilis (strain 168) OX=224308 GN=yrzF PE=3 SV=2	serine threonine-protein kinase [Bacillus stratosphericus LAMA 585]
gene1603	0.259717	0.519434	0	0	-Inf	1	1	gi|111111112|ref|scaffold2.1|	573382	573564	-	182	gene1603	-	-	-	-	-	hypothetical protein [Bacillus pumilus]
gene1604	0.00418898	0.00837796	0	0	-Inf	1	1	gi|111111112|ref|scaffold2.1|	573757	573906	+	149	gene1604	-	-	-	-	-	hypothetical protein BA79_06711 [Bacillus altitudinis 41KF2b] SIT92180.1 hypothetical protein SAMN05216491_2721 [Bacillus sp. RRD69]
gene1605	0.381197	0.762394	0	0	-Inf	1	1	gi|111111112|ref|scaffold2.1|	573937	575832	-	1895	gene1605	GO:0072528;GO:0044249;GO:0034641;GO:0006807;GO:1901362;GO:1901360;GO:0072527;GO:1901576;GO:0071704;GO:0018130;GO:0009987;GO:0006725;GO:0009058;GO:0008152;GO:1901564;GO:0046483;GO:0044271;GO:1901566;GO:0044272;GO:0044237;GO:0006790;GO:0019438;GO:0006772;GO:0044281;GO:0044283;GO:0042723;GO:0044711;GO:0042724;GO:0006767;GO:0006766;GO:0009228;GO:0044710;GO:0009110;GO:0042364;GO:0006732;GO:0009108;GO:…	K03147	ENOG4105CBF	H	sp|A8FFR8|THIC_BACP2|Phosphomethylpyrimidine synthase OS=Bacillus pumilus (strain SAFR-032) OX=315750 GN=thiC PE=3 SV=1	phosphomethylpyrimidine synthase ThiC [Bacillus pumilus]
gene1606	0.0209449	0.0418898	0	0	-Inf	1	1	gi|111111112|ref|scaffold2.1|	576244	576804	+	560	gene1606	GO:0071705;GO:0006810;GO:0015849;GO:0006811;GO:0006865;GO:0015711;GO:0044765;GO:0006820;GO:0071702;GO:0051234;GO:0051179;GO:0044699;GO:0046942;GO:0016020;GO:0016021;GO:0044464;GO:0005623;GO:0071944;GO:0005886;GO:0044425;GO:0031224	K06895	ENOG4108TS5	E	sp|P94381|YCGF_BACSU|Putative amino acid efflux protein YcgF OS=Bacillus subtilis (strain 168) OX=224308 GN=ycgF PE=3 SV=2	family homoserine threonine resistance transporter [Bacillus stratosphericus] EMI12441.1 family homoserine threonine resistance transporter [Bacillus stratosphericus LAMA 585]
gene1607	0.113102	0.226205	0	0	-Inf	1	1	gi|111111112|ref|scaffold2.1|	576851	577531	-	680	gene1607	-	K06345	-	-	sp|P94446|COXA_BACSU|Sporulation cortex protein CoxA OS=Bacillus subtilis (strain 168) OX=224308 GN=coxA PE=2 SV=4	spore cortex protein [Bacillus stratosphericus LAMA 585]
gene1608	0.548756	1.09751	0	0	-Inf	1	1	gi|111111112|ref|scaffold2.1|	577605	578702	-	1097	gene1608	GO:0044248;GO:0044036;GO:0071840;GO:0044260;GO:0016998;GO:0071554;GO:0071704;GO:0044699;GO:0009987;GO:0044763;GO:0008152;GO:0009056;GO:0044237;GO:0043170	K06370	ENOG4106678	S	sp|O32062|SAFA_BACSU|SpoIVD-associated factor A OS=Bacillus subtilis (strain 168) OX=224308 GN=safA PE=1 SV=1	SpoVID-associated morphogenetic protein [Bacillus pumilus] AKC66837.1 SpoVID-associated morphogenetic protein [Bacillus pumilus]
gene1609	0.125669	0.251339	0	0	-Inf	1	1	gi|111111112|ref|scaffold2.1|	578951	580021	-	1070	gene1609	GO:0019805;GO:0034641;GO:0044281;GO:1901576;GO:0072524;GO:0072525;GO:1901360;GO:0044710;GO:1901362;GO:0071704;GO:0018130;GO:0009987;GO:0009058;GO:0008152;GO:1901564;GO:0046483;GO:0044271;GO:1901566;GO:0044249;GO:0044237;GO:0006807;GO:0019752;GO:0043436;GO:0043648;GO:0006082;GO:0019674;GO:0006732;GO:0006733;GO:0046496;GO:0006139;GO:0044238;GO:0006725;GO:0051186;GO:0009117;GO:0055086;GO:0006796;GO:…	K03517	ENOG4105D0I	H	sp|A8FFS2|NADA_BACP2|Quinolinate synthase A OS=Bacillus pumilus (strain SAFR-032) OX=315750 GN=nadA PE=3 SV=1	quinolinate synthetase [Bacillus stratosphericus] KOA77210.1 quinolinate synthetase [Bacillus stratosphericus]
gene1610	0.00837796	0.0167559	0	0	-Inf	1	1	gi|111111112|ref|scaffold2.1|	580047	580886	-	839	gene1610	GO:0008152;GO:1901360;GO:0044710;GO:0046483;GO:1901564;GO:0019637;GO:0044281;GO:0006807;GO:0046496;GO:0051186;GO:0006753;GO:0019674;GO:0006732;GO:0006733;GO:0034641;GO:0006139;GO:0009987;GO:0006725;GO:0055086;GO:0072524;GO:0071704;GO:0009117;GO:0044238;GO:0044237;GO:0006796;GO:0006793;GO:0019362;GO:0009165;GO:1901362;GO:0019359;GO:1901566;GO:0019438;GO:1901576;GO:0051188;GO:0018130;GO:0034654;GO:…	K00767	ENOG4105D18	H	sp|P39666|NADC_BACSU|Probable nicotinate-nucleotide pyrophosphorylase [carboxylating] OS=Bacillus subtilis (strain 168) OX=224308 GN=nadC PE=1 SV=2	nicotinate-nucleotide diphosphorylase (carboxylating) [Bacillus sp. UNC125MFCrub1.1]
gene1611	0.159181	0.318362	0	0	-Inf	1	1	gi|111111112|ref|scaffold2.1|	580892	582481	-	1589	gene1611	GO:0044710;GO:0008152;GO:0055114;GO:0019674;GO:0006732;GO:0006733;GO:0046496;GO:0034641;GO:0044281;GO:0072524;GO:1901360;GO:0006139;GO:0051186;GO:0071704;GO:0009987;GO:0006725;GO:0009117;GO:1901564;GO:0055086;GO:0046483;GO:0044238;GO:0044237;GO:0006796;GO:0006807;GO:0006793;GO:0019637;GO:0006753;GO:0019362;GO:0009435;GO:0009165;GO:0009108;GO:0072525;GO:1901362;GO:0051188;GO:0019359;GO:0018130;GO:…	K00278	ENOG4108IYU	H	sp|P38032|NADB_BACSU|L-aspartate oxidase OS=Bacillus subtilis (strain 168) OX=224308 GN=nadB PE=3 SV=1	L-aspartate oxidase [Bacillus stratosphericus] KML63629.1 L-aspartate oxidase [Bacillus stratosphericus] KMN34354.1 L-aspartate oxidase [Bacillus stratosphericus] KMN73997.1 L-aspartate oxidase [Bacillus sp. LK10]
gene1612	0.0754016	0.150803	0	0	-Inf	1	1	gi|111111112|ref|scaffold2.1|	582556	583704	+	1148	gene1612	GO:0008152;GO:0043168;GO:0043167;GO:0003824;GO:0048037;GO:0005488;GO:0030170;GO:0016740;GO:0016782;GO:0016783;GO:0008483;GO:0031071;GO:0016769;GO:0016829	K04487	ENOG4107VH4	E	sp|P38033|NIFS_BACSU|Putative cysteine desulfurase NifS OS=Bacillus subtilis (strain 168) OX=224308 GN=nifS PE=2 SV=1	cysteine desulfurase [Bacillus altitudinis] OPW95272.1 cysteine desulfurase [Bacillus altitudinis]
gene1613	0.0251339	0.0502678	0	0	-Inf	1	1	gi|111111112|ref|scaffold2.1|	583906	584247	+	341	gene1613	GO:0036094;GO:0005488	K07105	ENOG4108Z3G	K	sp|P39667|NADR_BACSU|Transcription repressor NadR OS=Bacillus subtilis (strain 168) OX=224308 GN=nadR PE=1 SV=2	transcriptional regulator [Bacillus pumilus] AHL72287.1 transcriptional regulator [Bacillus pumilus]
gene1614	4.03399	8.06798	0	0	-Inf	1	1	gi|111111112|ref|scaffold2.1|	584272	585150	-	878	gene1614	GO:0008152;GO:0019752;GO:0044281;GO:0044710;GO:0071704;GO:0009987;GO:0043436;GO:0006082;GO:0044237;GO:0044238;GO:0044249;GO:0006807;GO:0044283;GO:1901362;GO:1901566;GO:1901360;GO:1901576;GO:0044711;GO:0006520;GO:0009094;GO:0009095;GO:1901605;GO:1901607;GO:1902221;GO:1902223;GO:0006725;GO:0009058;GO:0009072;GO:0009073;GO:0008652;GO:1901564;GO:0006558;GO:0046394;GO:0016053;GO:0019438;GO:0043648;GO:…	K04518	ENOG4105CQC	E	sp|P21203|PHEA_BACSU|Prephenate dehydratase OS=Bacillus subtilis (strain 168) OX=224308 GN=pheA PE=4 SV=1	prephenate dehydratase [Bacillus pumilus] KIL28811.1 Prephenate dehydratase [Bacillus pumilus]
gene1615	2.68514	5.37027	0	0	-Inf	1	1	gi|111111112|ref|scaffold2.1|	585169	585561	-	392	gene1615	GO:0008152;GO:0019752;GO:0044249;GO:0006807;GO:0044281;GO:0044283;GO:1901362;GO:1901566;GO:1901360;GO:1901576;GO:0044710;GO:0044711;GO:0006520;GO:0071704;GO:0009094;GO:0009095;GO:1901605;GO:1901607;GO:1902221;GO:0044238;GO:1902223;GO:0009987;GO:0006725;GO:0009058;GO:0043436;GO:0009072;GO:0009073;GO:0008652;GO:1901564;GO:0006558;GO:0006082;GO:0046394;GO:0016053;GO:0044237;GO:0019438;GO:0005488;GO:…	K06209	ENOG41090I5	E	sp|A8FFS7|Y2431_BACP2|UPF0735 ACT domain-containing protein BPUM_2431 OS=Bacillus pumilus (strain SAFR-032) OX=315750 GN=BPUM_2431 PE=3 SV=1	act domain-containing protein [Bacillus stratosphericus LAMA 585]
gene1617	1.54154	3.08309	0	0	-Inf	1	1	gi|111111112|ref|scaffold2.1|	586976	587569	-	593	gene1617	GO:0023014;GO:0016310;GO:0023052;GO:0007165;GO:0050789;GO:0044699;GO:0044267;GO:0051716;GO:0044260;GO:0000160;GO:0071704;GO:0065007;GO:0006468;GO:0044700;GO:0009987;GO:0006464;GO:0050794;GO:0043412;GO:0036211;GO:0044763;GO:0008152;GO:0007154;GO:0044238;GO:0019538;GO:0050896;GO:0044237;GO:0043170;GO:0006796;GO:0006793;GO:0038023;GO:0004673;GO:0060089;GO:0016773;GO:0000155;GO:0016301;GO:0016775;GO:…	K06375	ENOG4106DCF	S	sp|P06535|SP0B_BACSU|Sporulation initiation phosphotransferase B OS=Bacillus subtilis (strain 168) OX=224308 GN=spo0B PE=1 SV=1	sporulation protein [Bacillus pumilus] ANT57455.1 sporulation protein [Bacillus pumilus]
gene1618	11.7668	23.5337	0	0	-Inf	1	1	gi|111111112|ref|scaffold2.1|	587847	588131	-	284	gene1618	GO:0071704;GO:0044238;GO:0034645;GO:0044260;GO:0044267;GO:0019538;GO:0009987;GO:0010467;GO:0044237;GO:0043170;GO:0044249;GO:0009058;GO:0009059;GO:0008152;GO:1901576;GO:0006412;GO:0005198;GO:0003735;GO:0044464;GO:0005623;GO:0005737;GO:0032991;GO:0005840;GO:0043232;GO:0044444;GO:0030529;GO:0043229;GO:0043228;GO:0044424;GO:0005622;GO:0043226	K02899	ENOG4105K46	J	sp|A8FFT0|RL27_BACP2|50S ribosomal protein L27 OS=Bacillus pumilus (strain SAFR-032) OX=315750 GN=rpmA PE=3 SV=1	50S ribosomal protein L27 [Bacillus subtilis subsp. subtilis str. BSP1] AGE64391.1 50S ribosomal protein [Bacillus subtilis XF-1]
gene1619	12.7177	25.4355	0	0	-Inf	1	1	gi|111111112|ref|scaffold2.1|	588144	588482	-	338	gene1619	GO:0005737;GO:0032991;GO:0005840;GO:0043232;GO:0044464;GO:0044444;GO:0005623;GO:0030529;GO:0043229;GO:0043228;GO:0044424;GO:0005622;GO:0043226	K07584	ENOG4105X36	J	sp|P26942|YSXB_BACSU|Uncharacterized protein YsxB OS=Bacillus subtilis (strain 168) OX=224308 GN=ysxB PE=4 SV=2	hypothetical protein [Bacillus sp. UNC125MFCrub1.1]
gene162	0.00837796	0.0167559	0	0	-Inf	1	1	gi|111111111|ref|scaffold1.1|	151807	152055	-	248	gene162	-	-	-	-	-	hypothetical protein [Bacillus altitudinis] KDE32983.1 hypothetical protein BA79_03480 [Bacillus altitudinis 41KF2b]
gene1620	1.08495	2.16989	0	0	-Inf	1	1	gi|111111112|ref|scaffold2.1|	588497	588805	-	308	gene1620	GO:0044249;GO:0034645;GO:1901576;GO:0044267;GO:0044260;GO:0071704;GO:0010467;GO:0009987;GO:0009059;GO:0008152;GO:0044238;GO:0019538;GO:0009058;GO:0044237;GO:0043170;GO:0006412;GO:0097159;GO:0003735;GO:0005488;GO:0003676;GO:0005198;GO:1901363;GO:0003723;GO:0019843;GO:0044464;GO:0005623;GO:0005737;GO:0032991;GO:0005840;GO:0043232;GO:0044444;GO:0030529;GO:0043229;GO:0043228;GO:0044424;GO:0005622;GO:…	K02888	ENOG4105KK9	J	sp|A8FFT2|RL21_BACP2|50S ribosomal protein L21 OS=Bacillus pumilus (strain SAFR-032) OX=315750 GN=rplU PE=3 SV=1	50s ribosomal protein l21 [Bacillus stratosphericus LAMA 585]
gene1621	0.104725	0.209449	0	0	-Inf	1	1	gi|111111112|ref|scaffold2.1|	588958	589767	-	809	gene1621	GO:0044238;GO:0019538;GO:0043170;GO:0071704;GO:0008152;GO:0006508;GO:0016787;GO:0003824;GO:0008233;GO:0004175;GO:0004222;GO:0070011;GO:0008237	K06402	ENOG41081C9	S	sp|P26937|SP4FB_BACSU|Stage IV sporulation protein FB OS=Bacillus subtilis (strain 168) OX=224308 GN=spoIVFB PE=1 SV=1	Stage IV sporulation protein FB [Streptococcus pneumoniae] SFX29500.1 stage IV sporulation protein FB [Bacillus sp. ru9509.4]
gene1622	0.226205	0.45241	0	0	-Inf	1	1	gi|111111112|ref|scaffold2.1|	589820	590611	-	791	gene1622	-	K06401	ENOG4105GK7	M	sp|P26936|SP4FA_BACSU|Stage IV sporulation protein FA OS=Bacillus subtilis (strain 168) OX=224308 GN=spoIVFA PE=1 SV=1	stage IV sporulation protein FA [Bacillus pumilus] AKC66851.1 stage IV sporulation protein FA [Bacillus pumilus]
gene1623	3.7994	7.59881	0	0	-Inf	1	1	gi|111111112|ref|scaffold2.1|	590721	591377	-	656	gene1623	GO:0007049;GO:0009987;GO:0000910;GO:0044763;GO:0044699;GO:0022402;GO:0051301;GO:0046434;GO:0009166;GO:0009167;GO:0009164;GO:0006200;GO:0009161;GO:0046130;GO:0009169;GO:0044710;GO:0009199;GO:0042454;GO:0009207;GO:0009205;GO:0009203;GO:0046034;GO:0046128;GO:0046483;GO:1901564;GO:1901565;GO:0034641;GO:0006163;GO:0019637;GO:0044281;GO:0009141;GO:0009143;GO:0009144;GO:0009146;GO:0006807;GO:0006195;GO:…	K03609	ENOG4107QMS	D	sp|Q01464|MIND_BACSU|Septum site-determining protein MinD OS=Bacillus subtilis (strain 168) OX=224308 GN=minD PE=1 SV=1	septum site-determining protein MinD [Bacillus altitudinis] KWZ65337.1 septum site-determining protein MinD [Bacillus altitudinis]
gene1624	2.8904	5.78079	0	0	-Inf	1	1	gi|111111112|ref|scaffold2.1|	591527	591937	-	410	gene1624	GO:0007049;GO:0022607;GO:0022402;GO:0009653;GO:0044699;GO:0000902;GO:0048869;GO:0071840;GO:0016043;GO:0032989;GO:0051301;GO:0032502;GO:0032506;GO:0009987;GO:0044767;GO:0044763;GO:0048856;GO:0000910;GO:0000917;GO:0090529;GO:0044085;GO:0050789;GO:0065007;GO:0050794;GO:0051726;GO:0051302	K03610	ENOG4107YDG	D	sp|A8FFT6|MINC_BACP2|Probable septum site-determining protein MinC OS=Bacillus pumilus (strain SAFR-032) OX=315750 GN=minC PE=3 SV=1	septum site-determining protein MinC [Bacillus sp. RRD69] SIT92253.1 septum site-determining protein MinC [Bacillus sp. RRD69]
gene1625	1.03468	2.06936	0	0	-Inf	1	1	gi|111111112|ref|scaffold2.1|	592265	592756	-	491	gene1625	GO:0022604;GO:0065008;GO:0022603;GO:0050793;GO:0050794;GO:0008360;GO:0065007;GO:0051128;GO:0050789;GO:0016020;GO:0016021;GO:0044425;GO:0031224	K03571	ENOG4105YHC	M	sp|Q01467|MRED_BACSU|Rod shape-determining protein MreD OS=Bacillus subtilis (strain 168) OX=224308 GN=mreD PE=1 SV=1	cell-shape determining protein [Bacillus stratosphericus LAMA 585]
gene1626	6.90763	13.8153	0	0	-Inf	1	1	gi|111111112|ref|scaffold2.1|	592780	593679	-	899	gene1626	GO:0022604;GO:0022603;GO:0051128;GO:0050789;GO:0065007;GO:0065008;GO:0050793;GO:0050794;GO:0008360	K03570	ENOG4105N3I	M	sp|P84480|MREC_GEOSE|Cell shape-determining protein MreC OS=Geobacillus stearothermophilus OX=1422 GN=mreC PE=3 SV=1	rod shape-determining protein MreC [Bacillus zhangzhouensis] KEP26507.1 rod shape-determining protein MreC [Bacillus zhangzhouensis]
gene1628	3.86643	7.73286	0	0	-Inf	1	1	gi|111111112|ref|scaffold2.1|	594817	595491	-	674	gene1628	GO:0008152;GO:0044699;GO:0051716;GO:0009987;GO:0044763;GO:0050896;GO:0090304;GO:0034641;GO:0006807;GO:0006139;GO:0044260;GO:0071704;GO:1901360;GO:0006281;GO:0006725;GO:0006974;GO:0006950;GO:0046483;GO:0044238;GO:0044237;GO:0043170;GO:0033554;GO:0006259;GO:0097159;GO:0005488;GO:0003676;GO:0003677;GO:1901363	K03630	ENOG4105W5Q	L	sp|A8FFU0|Y2444_BACP2|UPF0758 protein BPUM_2444 OS=Bacillus pumilus (strain SAFR-032) OX=315750 GN=BPUM_2444 PE=3 SV=2	DNA repair protein RadC [Bacillus sp. M 2-6] EMI12462.1 dna repair protein [Bacillus stratosphericus LAMA 585] KDE31490.1 hypothetical protein BA79_06836 [Bacillus altitudinis 41KF2b] KIL28825.1 hypothetical protein B4133_2692 [Bacillus pumilus] BAT49606.1 DNA repair protein RadC [Bacillus pumilus] CVM26387.1 DNA repair protein RadC [Streptococcus pneumoniae] SCC09831.1 DNA replication and repair…
gene1629	2.8527	5.70539	0	0	-Inf	1	1	gi|111111112|ref|scaffold2.1|	595540	596109	-	569	gene1629	GO:0044464;GO:0005623;GO:0005737;GO:0005622;GO:0044424	K06287	ENOG4108Z03	D	sp|A8FFU1|MAF_BACP2|Septum formation protein Maf OS=Bacillus pumilus (strain SAFR-032) OX=315750 GN=maf PE=3 SV=1	septum formation inhibitor Maf [Bacillus altitudinis] OJT62520.1 septum formation inhibitor Maf [Bacillus altitudinis]
gene1631	0.0795906	0.159181	0	0	-Inf	1	1	gi|111111112|ref|scaffold2.1|	596287	597303	-	1016	gene1631	-	K06380	-	-	sp|P37575|SP2B_BACSU|Stage II sporulation protein B OS=Bacillus subtilis (strain 168) OX=224308 GN=spoIIB PE=1 SV=1	SPOR domain-containing protein [Bacillus sp. L_1B0_12]
gene1632	0.0209449	0.0418898	0	0	-Inf	1	1	gi|111111112|ref|scaffold2.1|	597461	598177	-	716	gene1632	GO:0008152;GO:0032259;GO:0071704;GO:0044238;GO:0019538;GO:0043170;GO:0006508;GO:0016787;GO:0003824;GO:0008233;GO:0004175;GO:0070001;GO:0070011;GO:0004190;GO:0016740;GO:0016741;GO:0008168;GO:0016020;GO:0016021;GO:0044425;GO:0031224	K02236	ENOG4105EHH	U	sp|P15378|LEP4_BACSU|Type 4 prepilin-like proteins leader peptide-processing enzyme OS=Bacillus subtilis (strain 168) OX=224308 GN=comC PE=2 SV=2	prepilin peptidase [Bacillus altitudinis] OPW95289.1 peptidase A24 [Bacillus altitudinis]
gene1633	3.4978	6.9956	0	0	-Inf	1	1	gi|111111112|ref|scaffold2.1|	598345	599646	-	1301	gene1633	GO:0046901;GO:0009058;GO:0008152;GO:0006732;GO:0019752;GO:0044249;GO:0034641;GO:0006807;GO:0009108;GO:0044281;GO:0044283;GO:1901362;GO:1901566;GO:1901360;GO:1901576;GO:0044710;GO:0009396;GO:0071704;GO:0006520;GO:0051188;GO:0042558;GO:0042559;GO:0042398;GO:1901605;GO:1901607;GO:0018130;GO:0006760;GO:0044238;GO:0009987;GO:0006725;GO:0044711;GO:0043436;GO:1901564;GO:0046483;GO:0008652;GO:0044271;GO:…	K11754	ENOG4105DPM	H	sp|Q05865|FOLC_BACSU|Dihydrofolate synthase/folylpolyglutamate synthase OS=Bacillus subtilis (strain 168) OX=224308 GN=folC PE=3 SV=2	bifunctional folylpolyglutamate synthase/dihydrofolate synthase [Bacillus stratosphericus] EMI12466.1 folylpolyglutamate synthase [Bacillus stratosphericus LAMA 585]
gene1635	0.0670237	0.134047	0	0	-Inf	1	1	gi|111111112|ref|scaffold2.1|	603084	603980	-	896	gene1635	GO:0008152;GO:0003824;GO:0016740;GO:0016772;GO:0019012;GO:0019028;GO:0044423	-	ENOG4106AR7	S	sp|P37964|YSXE_BACSU|Uncharacterized protein YsxE OS=Bacillus subtilis (strain 168) OX=224308 GN=ysxE PE=4 SV=1	spore coat protein YsxE [Bacillus stratosphericus] OQP22835.1 spore coat protein YsxE [Bacillus stratosphericus]
gene1636	0.146614	0.293229	0	0	-Inf	1	1	gi|111111112|ref|scaffold2.1|	604153	605208	-	1055	gene1636	GO:0044248;GO:0044036;GO:0071840;GO:0044260;GO:0016998;GO:0071554;GO:0071704;GO:0044699;GO:0009987;GO:0044763;GO:0008152;GO:0009056;GO:0044237;GO:0043170	K06417	ENOG41068KH	S	sp|P37963|SP6D_BACSU|Stage VI sporulation protein D OS=Bacillus subtilis (strain 168) OX=224308 GN=spoVID PE=1 SV=1	spore coat protein [Bacillus pumilus] BAT49613.1 spore coat assembly protein SpoVID [Bacillus pumilus] APP16262.1 spore coat protein [Bacillus pumilus]
gene1637	9.52155	19.0431	0	0	-Inf	1	1	gi|111111112|ref|scaffold2.1|	605729	607021	-	1292	gene1637	GO:0006779;GO:0008152;GO:0044249;GO:0034641;GO:0006807;GO:1901362;GO:1901360;GO:1901576;GO:0071704;GO:0033014;GO:0033013;GO:0018130;GO:0009987;GO:0006725;GO:0009058;GO:1901564;GO:0046483;GO:0044271;GO:1901566;GO:0044237;GO:0019438;GO:0006778;GO:0051188;GO:0051186;GO:0044710;GO:0042440;GO:0006783;GO:0006782;GO:0046501;GO:0042168;GO:0046148;GO:0015995;GO:0015994;GO:0003824;GO:0008483;GO:0005488;GO:…	K01845	ENOG4105CDM	H	sp|A8FFU9|GSA2_BACP2|Glutamate-1-semialdehyde 2,1-aminomutase 2 OS=Bacillus pumilus (strain SAFR-032) OX=315750 GN=hemL2 PE=3 SV=1	aspartate aminotransferase family protein [Bacillus stratosphericus] KML00756.1 glutamate-1-semialdehyde aminotransferase [Bacillus stratosphericus] KML47731.1 glutamate-1-semialdehyde aminotransferase [Bacillus stratosphericus]
gene1638	5.89389	11.7878	0	0	-Inf	1	1	gi|111111112|ref|scaffold2.1|	607049	608020	-	971	gene1638	GO:0033014;GO:0044249;GO:0034641;GO:0006807;GO:1901362;GO:1901360;GO:1901576;GO:0071704;GO:0033013;GO:0018130;GO:0009987;GO:0006725;GO:0009058;GO:0008152;GO:1901564;GO:0046483;GO:0044271;GO:1901566;GO:0044237;GO:0019438;GO:0006779;GO:0006778;GO:0051186;GO:0051188;GO:0016835;GO:0016836;GO:0016829;GO:0003824;GO:0004655;GO:0043169;GO:0043167;GO:0005488;GO:0046872	K01698	ENOG4105D52	H	sp|P30950|HEM2_BACSU|Delta-aminolevulinic acid dehydratase OS=Bacillus subtilis (strain 168) OX=224308 GN=hemB PE=3 SV=1	delta-aminolevulinic acid dehydratase [Bacillus pumilus] AKC66866.1 delta-aminolevulinic acid dehydratase [Bacillus pumilus]
gene1639	1.7091	3.41821	0	0	-Inf	1	1	gi|111111112|ref|scaffold2.1|	608017	608808	-	791	gene1639	GO:1901564;GO:0044271;GO:1901566;GO:0071704;GO:0009987;GO:0006725;GO:0034641;GO:0044237;GO:0044249;GO:0009058;GO:0006807;GO:0033013;GO:0033014;GO:0008152;GO:1901576;GO:0019438;GO:0046483;GO:1901362;GO:1901360;GO:0018130;GO:0016835;GO:0016829;GO:0003824;GO:0016836;GO:0004852	K01719	ENOG410644N	H	sp|P21248|HEM4_BACSU|Uroporphyrinogen-III synthase OS=Bacillus subtilis (strain 168) OX=224308 GN=hemD PE=3 SV=2	uroporphyrinogen-III synthase [Bacillus pumilus] AHL72313.1 uroporphyrinogen-III synthase [Bacillus pumilus]
gene164	1.05143	2.10287	0	0	-Inf	1	1	gi|111111111|ref|scaffold1.1|	152241	153332	-	1091	gene164	-	K06362	ENOG4108KVU	T	sp|P94583|RAPD_BACSU|Response regulator aspartate phosphatase D OS=Bacillus subtilis (strain 168) OX=224308 GN=rapD PE=3 SV=1	tetratricopeptide repeat protein [Bacillus altitudinis] KDE32982.1 hypothetical protein BA79_03475 [Bacillus altitudinis 41KF2b]
gene1640	3.46848	6.93695	0	0	-Inf	1	1	gi|111111112|ref|scaffold2.1|	608805	609740	-	935	gene1640	GO:0006779;GO:0071704;GO:0009987;GO:0008152;GO:0044237;GO:0044249;GO:0034641;GO:0006807;GO:1901362;GO:1901360;GO:0033014;GO:0033013;GO:0018130;GO:1901576;GO:0006725;GO:0009058;GO:1901564;GO:0046483;GO:0044271;GO:1901566;GO:0019438;GO:0006778;GO:0051186;GO:0051188;GO:0044710;GO:0042440;GO:0046148;GO:0006783;GO:0042168;GO:0006782;GO:0046501;GO:0018160;GO:0044267;GO:0018198;GO:0044260;GO:0018193;GO:…	K01749	ENOG4105D6W	H	sp|A8FFV2|HEM3_BACP2|Porphobilinogen deaminase OS=Bacillus pumilus (strain SAFR-032) OX=315750 GN=hemC PE=3 SV=1	hydroxymethylbilane synthase [Bacillus pumilus] AMM89867.1 porphobilinogen deaminase [Bacillus pumilus]
gene1641	4.08007	8.16013	0	0	-Inf	1	1	gi|111111112|ref|scaffold2.1|	609778	610605	-	827	gene1641	GO:0022607;GO:0070271;GO:0043933;GO:0034622;GO:0071840;GO:0071822;GO:0016043;GO:0065003;GO:0006461;GO:0043623;GO:0008535;GO:0044085;GO:0008152;GO:0016020	K02497	ENOG4108VN2	O	sp|P16645|HEMX_BACSU|Protein HemX OS=Bacillus subtilis (strain 168) OX=224308 GN=hemX PE=4 SV=2	cytochrome C assembly protein [Bacillus altitudinis] OJT62532.1 cytochrome C assembly protein [Bacillus altitudinis]
gene1642	12.1564	24.3128	0	0	-Inf	1	1	gi|111111112|ref|scaffold2.1|	610616	611983	-	1367	gene1642	GO:0033014;GO:0044249;GO:0034641;GO:0006807;GO:1901362;GO:1901360;GO:1901576;GO:0044710;GO:0071704;GO:0033013;GO:0018130;GO:0009987;GO:0006725;GO:0009058;GO:0008152;GO:1901564;GO:0055114;GO:0046483;GO:0044271;GO:1901566;GO:0044237;GO:0019438;GO:0006779;GO:0006778;GO:0051188;GO:0051186;GO:0042440;GO:0006783;GO:0006782;GO:0046501;GO:0042168;GO:0046148;GO:0015995;GO:0015994;GO:0016620;GO:0008883;GO:…	K02492	ENOG4105C7E	H	sp|A8FFV4|HEM1_BACP2|Glutamyl-tRNA reductase OS=Bacillus pumilus (strain SAFR-032) OX=315750 GN=hemA PE=3 SV=1	glutamyl-tRNA reductase [Bacillus sp. RRD69]
gene1643	0.360252	0.720505	0	0	-Inf	1	1	gi|111111112|ref|scaffold2.1|	612416	612709	+	293	gene1643	-	-	-	-	sp|P40736|YSXD_BACSU|Uncharacterized membrane protein YsxD OS=Bacillus subtilis (strain 168) OX=224308 GN=ysxD PE=4 SV=3	hypothetical protein [Bacillus aerophilus]
gene1644	0.100536	0.201071	0	0	-Inf	1	1	gi|111111112|ref|scaffold2.1|	612935	613330	-	395	gene1644	-	-	-	-	-	hypothetical protein [Bacillus pumilus] ALM28443.1 hypothetical protein AKO65_10670 [Bacillus pumilus] ALM44982.1 hypothetical protein AMR71_06980 [Bacillus pumilus] ANY96461.1 hypothetical protein AKO66_06985 [Bacillus pumilus]
gene1645	1.84315	3.6863	0	0	-Inf	1	1	gi|111111112|ref|scaffold2.1|	613331	614479	-	1148	gene1645	-	K23448	-	-	-	MFS transporter [Bacillus pumilus] ANT57483.1 MFS transporter [Bacillus pumilus]
gene1646	0.00837796	0.0167559	0	0	-Inf	1	1	gi|111111112|ref|scaffold2.1|	614550	614726	-	176	gene1646	-	-	-	-	-	hypothetical protein GA0061086_10361 [Bacillus sp. nio-1130]
gene1647	4.62882	9.25765	0	0	-Inf	1	1	gi|111111112|ref|scaffold2.1|	614928	615515	-	587	gene1647	GO:0007049;GO:0051301;GO:0044699;GO:0009987;GO:0044763;GO:0000910;GO:0022402;GO:0022607;GO:0071840;GO:0016043;GO:0032506;GO:0000917;GO:0090529;GO:0044085;GO:0035639;GO:0005488;GO:0000166;GO:1901363;GO:1901265;GO:0001882;GO:0043168;GO:0043167;GO:0032561;GO:0001883;GO:0032549;GO:0017076;GO:0005525;GO:0036094;GO:0097159;GO:0019001;GO:0032555;GO:0032550;GO:0032553	K03978	ENOG4105WHM	S	sp|A8FFV6|ENGB_BACP2|Probable GTP-binding protein EngB OS=Bacillus pumilus (strain SAFR-032) OX=315750 GN=engB PE=3 SV=1	YihA family ribosome biogenesis GTP-binding protein [Bacillus sp. Leaf49] KQU08616.1 GTP-binding protein [Bacillus sp. Leaf49]
gene1648	14.5818	29.1637	0	0	-Inf	1	1	gi|111111112|ref|scaffold2.1|	615512	617836	-	2324	gene1648	GO:0006200;GO:0006508;GO:0008152;GO:0009987;GO:0071704;GO:0044238;GO:0044237;GO:1901575;GO:0044248;GO:0009056;GO:0019538;GO:0043170;GO:0046434;GO:0009166;GO:0009167;GO:0009164;GO:0044281;GO:0009161;GO:0046130;GO:1901360;GO:0009169;GO:0044710;GO:0009199;GO:0042454;GO:0009207;GO:0009205;GO:0009203;GO:0046034;GO:0046128;GO:0046483;GO:1901564;GO:1901565;GO:0034641;GO:0006163;GO:0019637;GO:0009141;GO:…	K01338	ENOG4105C6P	O	sp|P37945|LON1_BACSU|Lon protease 1 OS=Bacillus subtilis (strain 168) OX=224308 GN=lon1 PE=1 SV=1	endopeptidase La [Bacillus aerophilus]
gene1649	0.330929	0.661859	0	0	-Inf	1	1	gi|111111112|ref|scaffold2.1|	618008	619540	-	1532	gene1649	GO:0046434;GO:0009166;GO:0009167;GO:0009164;GO:0044281;GO:0009161;GO:0046130;GO:1901360;GO:0009169;GO:0044710;GO:0009199;GO:0042454;GO:0009207;GO:0009205;GO:0009203;GO:0046034;GO:0046128;GO:0046483;GO:1901564;GO:1901565;GO:0019538;GO:0009128;GO:0006163;GO:0019637;GO:0009141;GO:0009143;GO:0009144;GO:0009146;GO:0006807;GO:0006195;GO:1901575;GO:0006200;GO:1901361;GO:0009150;GO:0009158;GO:0009154;GO:…	K04076	ENOG4108IUQ	O	sp|P42425|LON2_BACSU|Lon protease 2 OS=Bacillus subtilis (strain 168) OX=224308 GN=lon2 PE=2 SV=2	ATP-dependent protease LonB [Bacillus pumilus] ANT57486.1 Lon protease [Bacillus pumilus]
gene165	0.100536	0.201071	0	0	-Inf	1	1	gi|111111111|ref|scaffold1.1|	153844	154437	-	593	gene165	-	-	ENOG4105GQ3	S	-	SMI1 / KNR4 family protein [Bacillus altitudinis] KDE32981.1 hypothetical protein BA79_03470 [Bacillus altitudinis 41KF2b]
gene1651	53.7781	107.556	0	0	-Inf	1	1	gi|111111112|ref|scaffold2.1|	619808	621073	-	1265	gene1651	GO:0008152;GO:0071704;GO:0044238;GO:0019538;GO:0043170;GO:0006457;GO:0044267;GO:0044260;GO:0009987;GO:0044237;GO:0006508;GO:0035639;GO:0005488;GO:0043167;GO:1901363;GO:0001883;GO:0001882;GO:0043168;GO:0000166;GO:1901265;GO:0032549;GO:0017076;GO:0005524;GO:0036094;GO:0030554;GO:0097159;GO:0032559;GO:0032555;GO:0032550;GO:0032553;GO:0016787;GO:0003824;GO:0017111;GO:0016818;GO:0016817;GO:0016462;GO:…	K03544	ENOG4105CHN	O	sp|A8FFV9|CLPX_BACP2|ATP-dependent Clp protease ATP-binding subunit ClpX OS=Bacillus pumilus (strain SAFR-032) OX=315750 GN=clpX PE=3 SV=1	ATP-dependent protease ATP-binding subunit ClpX [Bacillus pumilus] AMB90599.1 ATP-dependent Clp protease ATP-binding subunit ClpX [Bacillus pumilus]
gene1652	40.918	81.8359	0	0	-Inf	1	1	gi|111111112|ref|scaffold2.1|	621325	622599	-	1274	gene1652	GO:0000413;GO:0009987;GO:0006457;GO:0044267;GO:0044260;GO:0071704;GO:0008152;GO:0044238;GO:0019538;GO:0044237;GO:0043170;GO:0008104;GO:0071702;GO:0033036;GO:0006810;GO:0045184;GO:0051234;GO:0051179;GO:0015031;GO:0018193;GO:0006464;GO:0043412;GO:0036211;GO:0018208;GO:0044699;GO:0044763;GO:0051301;GO:0007049;GO:0016853;GO:0003824;GO:0003755;GO:0016859;GO:0005737;GO:0044464;GO:0005623;GO:0005622;GO:…	K03545	ENOG4105DEA	O	sp|A8FFW0|TIG_BACP2|Trigger factor OS=Bacillus pumilus (strain SAFR-032) OX=315750 GN=tig PE=3 SV=1	trigger factor [Bacillus stratosphericus] KML00745.1 trigger factor [Bacillus stratosphericus] KML47720.1 trigger factor [Bacillus stratosphericus]
gene1653	0.774961	1.54992	0	0	-Inf	1	1	gi|111111112|ref|scaffold2.1|	622840	623847	-	1007	gene1653	GO:0008152;GO:0003824;GO:0016787	-	ENOG4108ZEP	S	sp|P94569|YSOA_BACSU|TPR repeat-containing protein YsoA OS=Bacillus subtilis (strain 168) OX=224308 GN=ysoA PE=4 SV=2	hypothetical protein [Bacillus stratosphericus] OQP22821.1 hypothetical protein B2I20_02260 [Bacillus stratosphericus]
gene1654	3.07471	6.14942	0	0	-Inf	1	1	gi|111111112|ref|scaffold2.1|	623971	624570	-	599	gene1654	GO:0008152;GO:0019752;GO:0044249;GO:0006807;GO:0044281;GO:0044283;GO:1901576;GO:0044710;GO:0044711;GO:0006520;GO:0071704;GO:0009098;GO:1901605;GO:1901607;GO:0044238;GO:0009987;GO:0009058;GO:0043436;GO:0008652;GO:1901564;GO:1901566;GO:0006082;GO:0046394;GO:0016053;GO:0044237;GO:0006551;GO:0009081;GO:0009082;GO:0003824;GO:0016835;GO:0016829;GO:0003861;GO:0016836;GO:0016853;GO:0005737;GO:0043234;GO:…	K01704	ENOG4105MQS	E	sp|A8FFW2|LEUD_BACP2|3-isopropylmalate dehydratase small subunit OS=Bacillus pumilus (strain SAFR-032) OX=315750 GN=leuD PE=3 SV=1	3-isopropylmalate dehydratase small subunit [Bacillus altitudinis] KLV22254.1 isopropylmalate isomerase [Bacillus altitudinis]
gene1655	8.00095	16.0019	0	0	-Inf	1	1	gi|111111112|ref|scaffold2.1|	624586	626001	-	1415	gene1655	GO:0008152;GO:0019752;GO:0044249;GO:0006807;GO:0044281;GO:0044283;GO:1901576;GO:0044710;GO:0044711;GO:0006520;GO:0071704;GO:0044238;GO:0009987;GO:0009058;GO:0043436;GO:0008652;GO:1901564;GO:1901566;GO:0006082;GO:0046394;GO:0016053;GO:0044237;GO:0009098;GO:1901605;GO:1901607;GO:0006551;GO:0009081;GO:0009082;GO:0016829;GO:0003824;GO:0005488;GO:0051540;GO:0051536;GO:0051539;GO:0016835;GO:0016836;GO:…	K01703	ENOG4105CQI	E	sp|A8FFW3|LEUC_BACP2|3-isopropylmalate dehydratase large subunit OS=Bacillus pumilus (strain SAFR-032) OX=315750 GN=leuC PE=3 SV=1	3-isopropylmalate dehydratase large subunit [Bacillus altitudinis] KWZ65364.1 3-isopropylmalate dehydratase large subunit [Bacillus altitudinis]
gene1656	14.3808	28.7615	0	0	-Inf	1	1	gi|111111112|ref|scaffold2.1|	626044	627141	-	1097	gene1656	GO:0044710;GO:0055114;GO:0008152;GO:0009987;GO:0044237;GO:0044238;GO:0071704;GO:0043436;GO:0044281;GO:0006082;GO:0019752;GO:1901564;GO:1901566;GO:0006807;GO:1901576;GO:0044249;GO:0009058;GO:0044711;GO:0044283;GO:0016053;GO:0008652;GO:0046394;GO:0009098;GO:1901605;GO:1901607;GO:0009081;GO:0009082;GO:0006520;GO:0006551;GO:0016616;GO:0016491;GO:0003824;GO:0016614;GO:0051287;GO:0005488;GO:0000166;GO:…	K00052	ENOG4105C0C	E	sp|Q65GI9|LEU3_BACLD|3-isopropylmalate dehydrogenase OS=Bacillus licheniformis (strain ATCC 14580 / DSM 13 / JCM 2505 / NBRC 12200 / NCIMB 9375/ NRRL NRS-1264 / Gibson 46) OX=279010 GN=leuB PE=3 SV=2	3-isopropylmalate dehydrogenase [Bacillus sp. TH007] KRV45068.1 3-isopropylmalate dehydrogenase [Bacillus sp. TH007]
gene1657	9.62209	19.2442	0	0	-Inf	1	1	gi|111111112|ref|scaffold2.1|	627160	628344	-	1184	gene1657	GO:0008152;GO:0019752;GO:0044281;GO:0044710;GO:0071704;GO:0009987;GO:0043436;GO:0006082;GO:0044237;GO:0044249;GO:0009058;GO:0006807;GO:0044283;GO:1901576;GO:0044711;GO:0006520;GO:0009098;GO:1901605;GO:1901607;GO:0044238;GO:0008652;GO:1901564;GO:1901566;GO:0046394;GO:0016053;GO:0006551;GO:0009081;GO:0009082;GO:0046912;GO:0003824;GO:0016740;GO:0016746;GO:0003852	K01649	ENOG4105CYQ	E	sp|A8FFW5|LEU11_BACP2|2-isopropylmalate synthase 1 OS=Bacillus pumilus (strain SAFR-032) OX=315750 GN=leuA1 PE=3 SV=1	2-isopropylmalate synthase [Bacillus stratosphericus LAMA 585]
gene1658	3.35118	6.70237	0	0	-Inf	1	1	gi|111111112|ref|scaffold2.1|	628700	629728	-	1028	gene1658	GO:0009082;GO:0044710;GO:0008152;GO:0019752;GO:0044249;GO:0006807;GO:0044281;GO:0044283;GO:1901576;GO:0044711;GO:0006520;GO:0071704;GO:0044238;GO:0009987;GO:0009058;GO:0043436;GO:0055114;GO:0008652;GO:1901564;GO:1901566;GO:0006082;GO:0046394;GO:0016053;GO:0044237;GO:0009081;GO:0006549;GO:0009099;GO:0009097;GO:1901605;GO:1901607;GO:0006573;GO:0016616;GO:0016614;GO:0003824;GO:0004455;GO:0016491;GO:…	K00053	ENOG4105C6M	E	sp|A8FFW6|ILVC_BACP2|Ketol-acid reductoisomerase (NADP(+)) OS=Bacillus pumilus (strain SAFR-032) OX=315750 GN=ilvC PE=3 SV=1	ketol-acid reductoisomerase [Bacillus sp. Leaf49] KQU08626.1 ketol-acid reductoisomerase [Bacillus sp. Leaf49]
gene1659	1.0263	2.0526	0	0	-Inf	1	1	gi|111111112|ref|scaffold2.1|	629747	629968	-	221	gene1659	GO:0009082;GO:0008152;GO:0019752;GO:0044249;GO:0006807;GO:0044281;GO:0044710;GO:0006520;GO:0071704;GO:0044238;GO:0009987;GO:0009058;GO:0043436;GO:1901564;GO:0006082;GO:0044237;GO:0044283;GO:1901576;GO:0044711;GO:0008652;GO:1901566;GO:0046394;GO:0016053;GO:0009081;GO:0016740;GO:0016744;GO:0003984;GO:0003824	K01653	ENOG4108ZP8	E	sp|P37252|ILVH_BACSU|Acetolactate synthase small subunit OS=Bacillus subtilis (strain 168) OX=224308 GN=ilvH PE=3 SV=3	acetolactate synthase small subunit [Bacillus xiamenensis] EKF35729.1 acetolactate synthase 3 regulatory subunit [Bacillus xiamenensis]
gene166	0.0670237	0.134047	0	0	-Inf	1	1	gi|111111111|ref|scaffold1.1|	154911	155294	+	383	gene166	GO:0006950;GO:0050896	-	ENOG4106XMP	S	-	hypothetical protein [Bacillus sp. TH007] KRV42812.1 stress protein [Bacillus sp. TH007]
gene1660	8.2104	16.4208	0	0	-Inf	1	1	gi|111111112|ref|scaffold2.1|	630262	631986	-	1724	gene1660	GO:0008152;GO:0044710;GO:0071704;GO:0044281;GO:0009987;GO:0044237;GO:0009082;GO:0019752;GO:0043436;GO:0006082;GO:0006807;GO:1901564;GO:0006520;GO:0044238;GO:0044249;GO:0009058;GO:0044283;GO:1901576;GO:0044711;GO:0008652;GO:1901566;GO:0046394;GO:0016053;GO:0009081;GO:1901605;GO:0006549;GO:0009099;GO:0009097;GO:1901607;GO:0006573;GO:0055114;GO:0003824;GO:0000287;GO:0005488;GO:0043167;GO:1901363;GO:…	K01652	ENOG4105C7K	E	sp|P37251|ILVB_BACSU|Acetolactate synthase large subunit OS=Bacillus subtilis (strain 168) OX=224308 GN=ilvB PE=1 SV=4	acetolactate synthase catalytic subunit [Bacillus stratosphericus LAMA 585]
gene1661	7.96744	15.9349	0	0	-Inf	1	1	gi|111111112|ref|scaffold2.1|	632365	633279	-	914	gene1661	GO:0008152;GO:0009081;GO:0044281;GO:0044710;GO:0043436;GO:1901564;GO:0006807;GO:0009987;GO:0006082;GO:0019752;GO:0006520;GO:0071704;GO:0044238;GO:0044237;GO:0044283;GO:0044711;GO:1901566;GO:0016053;GO:1901576;GO:0008652;GO:0046394;GO:0009058;GO:0044249;GO:0009082;GO:1901605;GO:1901607;GO:0006573;GO:0009098;GO:0009099;GO:0006551;GO:0006549;GO:0009097;GO:0004084;GO:0003824;GO:0008483;GO:0016740;GO:…	K00826	ENOG4105CM2	E	sp|Q58414|ILVE_METJA|Putative branched-chain-amino-acid aminotransferase OS=Methanocaldococcus jannaschii (strain ATCC 43067 / DSM 2661 / JAL-1/ JCM 10045 / NBRC 100440) OX=243232 GN=ilvE PE=3 SV=1	branched-chain amino acid aminotransferase [Bacillus stratosphericus LAMA 585]
gene1663	5.96511	11.9302	0	0	-Inf	1	1	gi|111111112|ref|scaffold2.1|	633712	634755	+	1043	gene1663	GO:0008152;GO:0019320;GO:0006739;GO:0006732;GO:0006733;GO:0046496;GO:0034641;GO:0006098;GO:0044281;GO:0072524;GO:1901360;GO:0006139;GO:0044710;GO:0051186;GO:0071704;GO:0046365;GO:0055114;GO:0046483;GO:0006740;GO:0019318;GO:0009987;GO:0006725;GO:1901575;GO:0009117;GO:0044723;GO:1901564;GO:0009056;GO:0055086;GO:0044724;GO:0044238;GO:0006007;GO:0005975;GO:0005996;GO:0016052;GO:0044237;GO:0006796;GO:…	K07404	ENOG4105HHQ	G	sp|O34499|6PGL_BACSU|6-phosphogluconolactonase OS=Bacillus subtilis (strain 168) OX=224308 GN=pgl PE=1 SV=1	hypothetical protein [Bacillus pumilus]
gene1664	1.29439	2.58879	0	0	-Inf	1	1	gi|111111112|ref|scaffold2.1|	634943	635362	-	419	gene1664	-	-	ENOG4105WBM	S	-	hypothetical protein [Bacillus stratosphericus] KOA81065.1 hypothetical protein ACR53_04600 [Bacillus stratosphericus]
gene1665	14.9924	29.9847	0	0	-Inf	1	1	gi|111111112|ref|scaffold2.1|	635458	636624	-	1166	gene1665	GO:0008152;GO:0003824;GO:0016787	K03740	ENOG4108M4D	M	sp|P39578|DLTD_BACSU|Protein DltD OS=Bacillus subtilis (strain 168) OX=224308 GN=dltD PE=3 SV=1	D-alanyl-lipoteichoic acid biosynthesis protein DltD [Bacillus pumilus] ALM28425.1 alanine transporter [Bacillus pumilus] ALM44964.1 alanine transporter [Bacillus pumilus] ANY96443.1 alanine transporter [Bacillus pumilus]
gene1666	0.305796	0.611591	0	0	-Inf	1	1	gi|111111112|ref|scaffold2.1|	636624	636860	-	236	gene1666	GO:0070400;GO:0044036;GO:0044281;GO:0034645;GO:0044283;GO:0044699;GO:0044038;GO:0071554;GO:0044710;GO:0044711;GO:0044260;GO:0019350;GO:0071704;GO:0044085;GO:0071840;GO:1901576;GO:0046374;GO:0009987;GO:0009058;GO:0009059;GO:0044763;GO:0008152;GO:0042546;GO:0006082;GO:0009273;GO:1901137;GO:1901135;GO:0016053;GO:0044237;GO:0043170;GO:0070395;GO:0070394;GO:0044249;GO:0070589;GO:0022604;GO:0022603;GO:…	K14188	ENOG4105X96	H	sp|A8FFX3|DLTC_BACP2|D-alanyl carrier protein OS=Bacillus pumilus (strain SAFR-032) OX=315750 GN=dltC PE=3 SV=1	D-alanine--poly(phosphoribitol) ligase subunit 2 [Bacillus xiamenensis] EKF33778.1 D-alanine--poly(phosphoribitol) ligase subunit 2 [Bacillus xiamenensis] AOZ89811.1 D-alanine--poly(phosphoribitol) ligase subunit 2 [Bacillus xiamenensis]
gene1669	1.89342	3.78684	0	0	-Inf	1	1	gi|111111112|ref|scaffold2.1|	639987	641006	-	1019	gene1669	GO:0008152;GO:0071704;GO:0044238;GO:0043170;GO:0009987;GO:0044260;GO:0044237;GO:0032774;GO:0019222;GO:0031323;GO:0090304;GO:0044249;GO:0034641;GO:0006807;GO:0034645;GO:1901576;GO:1901362;GO:0050789;GO:1901360;GO:0080090;GO:2000112;GO:0010467;GO:0010556;GO:0065007;GO:0031326;GO:0060255;GO:0010468;GO:0018130;GO:0006139;GO:0019219;GO:0009889;GO:0006725;GO:0050794;GO:0051171;GO:2001141;GO:0034654;GO:…	-	ENOG4107QQA	S	sp|B3M9V8|KLHDB_DROAN|Kelch-like protein diablo OS=Drosophila ananassae OX=7217 GN=dbo PE=3 SV=2	hypothetical protein [Bacillus altitudinis] OJT62557.1 hypothetical protein BFP48_06125 [Bacillus altitudinis]
gene167	0.196882	0.393764	0	0	-Inf	1	1	gi|111111111|ref|scaffold1.1|	155322	155564	-	242	gene167	-	-	-	-	-	hypothetical protein UF15_03430 [Bacillus sp. L_1B0_12]
gene1670	0.00837796	0.0167559	0	0	-Inf	1	1	gi|111111112|ref|scaffold2.1|	642017	642196	-	179	gene1670	-	-	-	-	-	hypothetical protein [Bacillus pumilus] ABV63145.1 hypothetical protein BPUM_2482 [Bacillus pumilus SAFR-032]
gene1671	0.0712127	0.142425	0	0	-Inf	1	1	gi|111111112|ref|scaffold2.1|	642353	642820	+	467	gene1671	-	-	-	-	-	hypothetical protein SAMN04487921_103142 [Bacillus sp. ru9509.4]
gene1672	0.00837796	0.0167559	0	0	-Inf	1	1	gi|111111112|ref|scaffold2.1|	643212	643568	-	356	gene1672	-	-	-	-	-	hypothetical protein [Bacillus safensis] APJ12017.1 hypothetical protein BSL056_14045 [Bacillus safensis]
gene1673	4.4487	8.89739	0	0	-Inf	1	1	gi|111111112|ref|scaffold2.1|	644099	644548	-	449	gene1673	-	-	-	-	-	-
gene1674	0.0586457	0.117291	0	0	-Inf	1	1	gi|111111112|ref|scaffold2.1|	644551	645144	-	593	gene1674	-	-	-	-	-	hypothetical protein [Bacillus pumilus] BAT49683.1 RHS family protein [Bacillus pumilus]
gene1675	0.00418898	0.00837796	0	0	-Inf	1	1	gi|111111112|ref|scaffold2.1|	645258	645389	-	131	gene1675	-	-	-	-	-	hypothetical protein BN2127_JRS3_00487 [Bacillus pumilus]
gene1676	0.0628347	0.125669	0	0	-Inf	1	1	gi|111111112|ref|scaffold2.1|	645417	645935	-	518	gene1676	-	-	-	-	-	hypothetical protein ACJ64_12980 [Bacillus pumilus]
gene1677	0.0251339	0.0502678	0	0	-Inf	1	1	gi|111111112|ref|scaffold2.1|	645999	646868	-	869	gene1677	-	-	ENOG4107MHM	S	-	hypothetical protein [Bacillus sp. Root920]
gene1678	0.0125669	0.0251339	0	0	-Inf	1	1	gi|111111112|ref|scaffold2.1|	647117	647659	-	542	gene1678	GO:0006310;GO:0006139;GO:0044260;GO:0044238;GO:0009987;GO:0006725;GO:0044237;GO:0043170;GO:0090304;GO:0034641;GO:0006807;GO:0008152;GO:0006259;GO:0071704;GO:1901360;GO:0046483;GO:0015074;GO:0097159;GO:0005488;GO:0003676;GO:0003677;GO:1901363	-	ENOG4108ZUI	L	sp|O35009|YOEC_BACSU|Probable integrase/recombinase YoeC OS=Bacillus subtilis (strain 168) OX=224308 GN=yoeC PE=3 SV=2	site-specific integrase [Bacillus safensis]
gene168	0.402142	0.804284	0	0	-Inf	1	1	gi|111111111|ref|scaffold1.1|	155730	156140	-	410	gene168	-	-	ENOG4106DW5	S	sp|O31506|YEEF_BACSU|Putative ribonuclease YeeF OS=Bacillus subtilis (strain 168) OX=224308 GN=yeeF PE=1 SV=2	hypothetical protein VL09_17130 [Bacillus stratosphericus] KML64012.1 hypothetical protein VL19_00085 [Bacillus stratosphericus] KMN34455.1 hypothetical protein ABW26_00515 [Bacillus stratosphericus] KMN75376.1 hypothetical protein VK97_03815 [Bacillus sp. LK10]
gene1680	10.9877	21.9754	0	0	-Inf	1	1	gi|111111112|ref|scaffold2.1|	648324	648848	-	524	gene1680	GO:0008152;GO:0016787;GO:0016788;GO:0003824	K07095	ENOG4105M59	S	sp|P94559|YSNB_BACSU|Putative metallophosphoesterase YsnB OS=Bacillus subtilis (strain 168) OX=224308 GN=ysnB PE=3 SV=2	metallophosphatase [Bacillus altitudinis] KDE31536.1 phosphoesterase [Bacillus altitudinis 41KF2b]
gene1681	1.42425	2.84851	0	0	-Inf	1	1	gi|111111112|ref|scaffold2.1|	648863	649456	-	593	gene1681	GO:0008152;GO:0046434;GO:0009141;GO:0009143;GO:0044248;GO:0034641;GO:0006807;GO:0044281;GO:1901360;GO:1901361;GO:0006139;GO:0044710;GO:0071704;GO:0009987;GO:0006725;GO:1901575;GO:0046700;GO:0019439;GO:0034655;GO:0009056;GO:0055086;GO:0046483;GO:0044238;GO:0044270;GO:0044237;GO:0006796;GO:1901292;GO:0006793;GO:0019637;GO:0006753;GO:0009117;GO:0072521;GO:1901564;GO:0006163;GO:0016787;GO:0003824;GO:…	K02428	ENOG4108V82	F	sp|P94558|IXTPA_BACSU|dITP/XTP pyrophosphatase OS=Bacillus subtilis (strain 168) OX=224308 GN=ysnA PE=3 SV=1	nucleoside-triphosphatase [Bacillus stratosphericus LAMA 585]
gene1682	1.064	2.128	0	0	-Inf	1	1	gi|111111112|ref|scaffold2.1|	649476	650204	-	728	gene1682	GO:0090304;GO:0034641;GO:0006807;GO:0034660;GO:1901360;GO:0034470;GO:0006139;GO:0044260;GO:0071704;GO:0010467;GO:0009987;GO:0006725;GO:0008152;GO:0046483;GO:0016070;GO:0044238;GO:0044237;GO:0043170;GO:0006396;GO:0090305;GO:0008033;GO:0006399;GO:0016787;GO:0016788;GO:0003824;GO:0004518;GO:0004540;GO:0016779;GO:0005488;GO:0003676;GO:1901363;GO:0004549;GO:0000049;GO:0016740;GO:0016772;GO:0003723;GO:…	K00989	ENOG4105ED0	J	sp|A8FFY6|RNPH_BACP2|Ribonuclease PH OS=Bacillus pumilus (strain SAFR-032) OX=315750 GN=rph PE=3 SV=1	ribonuclease PH [Bacillus pumilus] ANT57507.1 ribonuclease PH [Bacillus pumilus]
gene1683	0.0335118	0.0670237	0	0	-Inf	1	1	gi|111111112|ref|scaffold2.1|	650356	651417	-	1061	gene1683	-	K06298	ENOG4108XJQ	S	sp|P39072|GERM_BACSU|Spore germination protein GerM OS=Bacillus subtilis (strain 168) OX=224308 GN=gerM PE=1 SV=2	sporulation protein [Bacillus sp. L_1B0_12] KKK09539.1 sporulation protein [Bacillus sp. L_1B0_12]
gene1684	2.2411	4.48221	0	0	-Inf	1	1	gi|111111112|ref|scaffold2.1|	651519	652271	-	752	gene1684	GO:0044710;GO:1901564;GO:1901566;GO:0070589;GO:0030203;GO:0009252;GO:0044036;GO:0006807;GO:0044038;GO:1901576;GO:0044260;GO:0071840;GO:0008152;GO:0042546;GO:0006022;GO:0006023;GO:0006024;GO:0044249;GO:0034645;GO:0044699;GO:0009987;GO:0009273;GO:1901137;GO:1901135;GO:0043170;GO:0071554;GO:0071704;GO:0000270;GO:0009058;GO:0009059;GO:0044763;GO:0044237;GO:0044085;GO:0050789;GO:0065007;GO:0050794;GO:…	K01776	ENOG4105F03	M	sp|A8FFY8|MURI_BACP2|Glutamate racemase OS=Bacillus pumilus (strain SAFR-032) OX=315750 GN=murI PE=3 SV=1	glutamate racemase [Bacillus pumilus] AKU33245.1 glutamate racemase [Bacillus pumilus]
gene1685	0.469166	0.938332	0	0	-Inf	1	1	gi|111111112|ref|scaffold2.1|	652345	652785	-	440	gene1685	GO:0019222;GO:0031326;GO:0031323;GO:0050789;GO:0080090;GO:2000112;GO:0060255;GO:0065007;GO:0010468;GO:0019219;GO:0009889;GO:0050794;GO:0051171;GO:2001141;GO:0051252;GO:0006355;GO:0010556;GO:0032774;GO:0090304;GO:0044249;GO:0034641;GO:0006807;GO:0034645;GO:1901362;GO:1901360;GO:0006139;GO:0044260;GO:0071704;GO:0010467;GO:0018130;GO:1901576;GO:0006725;GO:0009987;GO:0009058;GO:0009059;GO:0008152;GO:…	-	ENOG41067TZ	K	sp|P97247|YSMB_BACSU|Uncharacterized HTH-type transcriptional regulator YsmB OS=Bacillus subtilis (strain 168) OX=224308 GN=ysmB PE=4 SV=1	MarR family transcriptional regulator [Bacillus sp. I-2] OMP27742.1 MarR family transcriptional regulator [Bacillus sp. I-2]
gene1686	9.78127	19.5625	0	0	-Inf	1	1	gi|111111112|ref|scaffold2.1|	653056	654579	-	1523	gene1686	GO:1901360;GO:0046483;GO:0006807;GO:0044260;GO:0008152;GO:0034641;GO:0006139;GO:0009987;GO:0006725;GO:0043170;GO:0090304;GO:0071704;GO:0006310;GO:0044238;GO:0044237;GO:0006259;GO:0003676;GO:0003677;GO:1901363;GO:0003824;GO:0097159;GO:0000150;GO:0005488	K06400	ENOG4105C6I	L	sp|P17867|CISA_BACSU|Putative DNA recombinase OS=Bacillus subtilis (strain 168) OX=224308 GN=cisA PE=3 SV=2	serine recombinase [Bacillus altitudinis] KLV14829.1 serine recombinase [Bacillus altitudinis]
gene1687	0.0837796	0.167559	0	0	-Inf	1	1	gi|111111112|ref|scaffold2.1|	654846	655676	+	830	gene1687	-	-	-	-	-	hypothetical protein [Bacillus altitudinis]
gene1689	0.356063	0.712127	0	0	-Inf	1	1	gi|111111112|ref|scaffold2.1|	656082	656573	+	491	gene1689	-	-	-	-	-	hypothetical protein [Bacillus altitudinis]
gene1690	1.34047	2.68095	0	0	-Inf	1	1	gi|111111112|ref|scaffold2.1|	656846	657646	-	800	gene1690	GO:0008152;GO:0071704;GO:0043170;GO:0009056;GO:1901564;GO:1901565;GO:0030203;GO:0006807;GO:1901575;GO:0006022;GO:0006026;GO:0006027;GO:0009253;GO:1901136;GO:1901135;GO:0000270;GO:0009057;GO:0009987;GO:0044699;GO:0044763;GO:0071840;GO:0071554;GO:0044260;GO:0044237;GO:0044036;GO:0016998;GO:0044248;GO:0008745;GO:0016787;GO:0003824;GO:0016810;GO:0016811	K01448	ENOG4105C5C	M	sp|O48471|ENLYS_BPSPP|Endolysin OS=Bacillus phage SPP1 OX=10724 GN=25 PE=4 SV=1	N-acetylmuramoyl-L-alanine amidase [Bacillus safensis] KKD42571.1 N-acetylmuramoyl-L-alanine amidase [Bacillus safensis]
gene1691	0.00418898	0.00837796	0	0	-Inf	1	1	gi|111111112|ref|scaffold2.1|	657692	658111	-	419	gene1691	-	-	ENOG4105XSJ	S	sp|P24811|YQXH_BACSU|Uncharacterized protein YqxH OS=Bacillus subtilis (strain 168) OX=224308 GN=yqxH PE=3 SV=1	holin [Bacillus safensis] OUE34222.1 holin [Bacillus safensis]
gene1694	0.0795906	0.159181	0	0	-Inf	1	1	gi|111111112|ref|scaffold2.1|	658644	659999	-	1355	gene1694	GO:0008152;GO:0030203;GO:0044248;GO:0044036;GO:0006807;GO:0009253;GO:0044699;GO:1901575;GO:0044260;GO:0016998;GO:0071554;GO:0071704;GO:0071840;GO:0009987;GO:0000270;GO:0044763;GO:1901564;GO:0009056;GO:0009057;GO:0044238;GO:0005975;GO:1901565;GO:1901136;GO:1901135;GO:0044237;GO:0043170;GO:0006022;GO:0006026;GO:0006027;GO:0003796;GO:0016787;GO:0004553;GO:0016798;GO:0003824	-	ENOG41067FB	S	sp|O31966|YOMR_BACSU|SPBc2 prophage-derived uncharacterized protein YomR OS=Bacillus subtilis (strain 168) OX=224308 GN=yomR PE=4 SV=1	hypothetical protein [Bacillus pumilus]
gene1696	0.16337	0.32674	0	0	-Inf	1	1	gi|111111112|ref|scaffold2.1|	660265	662166	-	1901	gene1696	-	-	ENOG4105Q5Q	S	sp|O34433|YOBO_BACSU|Putative phage-related protein YobO OS=Bacillus subtilis (strain 168) OX=224308 GN=yobO PE=4 SV=1	hypothetical protein [Bacillus pumilus]
gene1697	0.0209449	0.0418898	0	0	-Inf	1	1	gi|111111112|ref|scaffold2.1|	662202	663950	-	1748	gene1697	GO:0008152;GO:0030203;GO:0009253;GO:1901575;GO:0009057;GO:0071704;GO:0000270;GO:0009056;GO:1901564;GO:1901565;GO:1901136;GO:1901135;GO:0043170;GO:0006807;GO:0006022;GO:0006026;GO:0006027;GO:0044699;GO:0009987;GO:0044763;GO:0044036;GO:0044260;GO:0071554;GO:0071840;GO:0044237;GO:0006928;GO:0051674;GO:0001539;GO:0051179;GO:0040011;GO:0048870;GO:0044248;GO:0016998;GO:0016787;GO:0003824;GO:0004040;GO:…	K02395	ENOG4108ZW7	U	sp|O32083|LYTG_BACSU|Exo-glucosaminidase LytG OS=Bacillus subtilis (strain 168) OX=224308 GN=lytG PE=1 SV=1	alkaline phosphatase [Bacillus pumilus]
gene1699	0.150803	0.301607	0	0	-Inf	1	1	gi|111111112|ref|scaffold2.1|	664799	669232	-	4433	gene1699	-	-	ENOG4105E1R	M	sp|E7DNB6|TMP_BPDP1|Tape measure protein OS=Pneumococcus phage Dp-1 OX=59241 GN=TMP PE=4 SV=1	phage tail tape measure protein [Bacillus pumilus]
gene17	1.18548	2.37096	0	0	-Inf	1	1	gi|111111111|ref|scaffold1.1|	18249	19001	-	752	gene17	GO:0019222;GO:0031326;GO:0031323;GO:0050789;GO:0080090;GO:2000112;GO:0060255;GO:0065007;GO:0010468;GO:0019219;GO:0009889;GO:0050794;GO:0051171;GO:2001141;GO:0051252;GO:0006355;GO:0010556;GO:0032774;GO:0090304;GO:0044249;GO:0034641;GO:0006807;GO:0034645;GO:1901362;GO:1901360;GO:0006139;GO:0044260;GO:0071704;GO:0010467;GO:0018130;GO:1901576;GO:0006725;GO:0009987;GO:0009058;GO:0009059;GO:0008152;GO:…	K06608	ENOG4105E98	K	sp|P46337|IOLR_BACSU|HTH-type transcriptional regulator IolR OS=Bacillus subtilis (strain 168) OX=224308 GN=iolR PE=4 SV=1	DeoR/GlpR transcriptional regulator [Bacillus pumilus] BAT48930.1 DeoR family transcriptional regulator [Bacillus pumilus]
gene170	0.00837796	0.0167559	0	0	-Inf	1	1	gi|111111111|ref|scaffold1.1|	157415	157570	-	155	gene170	-	-	-	-	-	hypothetical protein [Bacillus stratosphericus] KOA81549.1 hypothetical protein ACR53_02810 [Bacillus stratosphericus]
gene1702	0.0125669	0.0251339	0	0	-Inf	1	1	gi|111111112|ref|scaffold2.1|	669834	670448	-	614	gene1702	-	-	ENOG4107GKN	S	-	phage tail protein [Bacillus pumilus] OBS85373.1 phage tail protein [Bacillus pumilus]
gene1709	0.318362	0.636725	0	0	-Inf	1	1	gi|111111112|ref|scaffold2.1|	673629	674084	-	455	gene1709	GO:0008152;GO:0044238;GO:0019538;GO:0043170;GO:0071704;GO:0006508;GO:0003824;GO:0008233;GO:0016787	K06904	ENOG4105MAP	S	-	peptidase U35 [Bacillus altitudinis] KDE31564.1 phage head maturation protease [Bacillus altitudinis 41KF2b]
gene171	0.142425	0.284851	0	0	-Inf	1	1	gi|111111111|ref|scaffold1.1|	157584	157973	-	389	gene171	-	-	-	-	-	hypothetical protein [Bacillus pumilus] AKC66099.1 hypothetical protein VT48_08710 [Bacillus pumilus]
gene1710	0.129858	0.259717	0	0	-Inf	1	1	gi|111111112|ref|scaffold2.1|	674215	675480	-	1265	gene1710	-	-	ENOG4105EFC	O	sp|P49859|PORTL_BPHK7|Portal protein OS=Enterobacteria phage HK97 OX=37554 GN=3 PE=3 SV=1	phage portal protein [Bacillus altitudinis] KLV15089.1 phage portal protein [Bacillus altitudinis]
gene1712	0.0544567	0.108913	0	0	-Inf	1	1	gi|111111112|ref|scaffold2.1|	675679	677370	-	1691	gene1712	-	-	ENOG4105CAR	L	sp|P59217|TERL_BPSF5|Putative terminase large subunit OS=Shigella phage SfV OX=55884 GN=2 PE=3 SV=1	terminase [Bacillus altitudinis]
gene1713	0.117291	0.234583	0	0	-Inf	1	1	gi|111111112|ref|scaffold2.1|	677385	677924	-	539	gene1713	-	-	ENOG4105XXU	S	-	terminase [Bacillus altitudinis] KDE31568.1 hypothetical protein BA79_07226 [Bacillus altitudinis 41KF2b]
gene1714	0.0377008	0.0754016	0	0	-Inf	1	1	gi|111111112|ref|scaffold2.1|	678128	678493	-	365	gene1714	GO:0090305;GO:0006139;GO:0044238;GO:0009987;GO:0006725;GO:0044237;GO:0043170;GO:0090304;GO:0071704;GO:0034641;GO:0006807;GO:0008152;GO:1901360;GO:0046483;GO:0016787;GO:0004518;GO:0004519;GO:0016788;GO:0003824;GO:0005488;GO:0003676;GO:0097159;GO:1901363	K07451	ENOG41061TG	V	-	HNH endonuclease [Bacillus pumilus]
gene1715	0.594835	1.18967	0	0	-Inf	1	1	gi|111111112|ref|scaffold2.1|	678580	679665	-	1085	gene1715	-	-	-	-	-	hypothetical protein [Bacillus amyloliquefaciens] COD43111.1 Uncharacterised protein [Streptococcus pneumoniae] APB82404.1 hypothetical protein BAMY_09655 [Bacillus amyloliquefaciens]
gene1716	0.0963465	0.192693	0	0	-Inf	1	1	gi|111111112|ref|scaffold2.1|	679849	680529	-	680	gene1716	-	-	-	-	-	hypothetical protein [Bacillus xiamenensis] EKF36685.1 hypothetical protein BA1_03845 [Bacillus xiamenensis]
gene1717	0.0712127	0.142425	0	0	-Inf	1	1	gi|111111112|ref|scaffold2.1|	680652	681044	-	392	gene1717	-	-	-	-	-	hypothetical protein [Bacillus pumilus] KDE50907.1 hypothetical protein DJ67_18310 [Bacillus pumilus] KEO47131.1 hypothetical protein GZ55_17990 [Bacillus pumilus]
gene1718	0.544567	1.08913	0	0	-Inf	1	1	gi|111111112|ref|scaffold2.1|	681379	681957	-	578	gene1718	-	-	-	-	-	hypothetical protein [Bacillus safensis]
gene1721	0.0544567	0.108913	0	0	-Inf	1	1	gi|111111112|ref|scaffold2.1|	682719	683111	-	392	gene1721	-	-	ENOG410682Q	K	sp|Q926A6|Y1259_LISIN|Uncharacterized phage-related protein Lin1259/Lin1739 OS=Listeria innocua serovar 6a (strain ATCC BAA-680 / CLIP 11262) OX=272626 GN=lin1259 PE=4 SV=1	ArpU family transcriptional regulator [Bacillus altitudinis]
gene1722	0.0125669	0.0251339	0	0	-Inf	1	1	gi|111111112|ref|scaffold2.1|	683383	683793	-	410	gene1722	-	-	-	-	-	hypothetical protein [Bacillus safensis] KKD42575.1 hypothetical protein KU48_04535 [Bacillus safensis] ARD56276.1 hypothetical protein BRL64_08810 [Bacillus safensis]
gene1723	0.0670237	0.134047	0	0	-Inf	1	1	gi|111111112|ref|scaffold2.1|	684314	684442	+	128	gene1723	-	-	-	-	-	-
gene1724	0.0293229	0.0586457	0	0	-Inf	1	1	gi|111111112|ref|scaffold2.1|	684454	684711	-	257	gene1724	-	-	-	-	-	hypothetical protein [Bacillus pumilus] BAT49694.1 uncharacterized protein BTUAT1_25600 [Bacillus pumilus]
gene1725	0.0460788	0.0921576	0	0	-Inf	1	1	gi|111111112|ref|scaffold2.1|	685448	685978	-	530	gene1725	-	-	-	-	-	hypothetical protein [Bacillus pumilus] AOC55414.1 hypothetical protein BEN31_00765 [Bacillus pumilus]
gene1727	0.0209449	0.0418898	0	0	-Inf	1	1	gi|111111112|ref|scaffold2.1|	686214	686960	-	746	gene1727	GO:0008152;GO:0035639;GO:0005488;GO:0043167;GO:1901363;GO:0001883;GO:0001882;GO:0043168;GO:0000166;GO:1901265;GO:0032549;GO:0017076;GO:0005524;GO:0036094;GO:0030554;GO:0097159;GO:0032559;GO:0032555;GO:0032550;GO:0032553;GO:0016787;GO:0017111;GO:0003824;GO:0016818;GO:0016817;GO:0016462	K02315	ENOG4107ZK2	L	sp|P57134|DNAC_BUCAI|DNA replication protein DnaC OS=Buchnera aphidicola subsp. Acyrthosiphon pisum (strain APS) OX=107806 GN=dnaC PE=3 SV=1	hypothetical protein BSA145_08330 [Bacillus safensis]
gene1728	0.00837796	0.0167559	0	0	-Inf	1	1	gi|111111112|ref|scaffold2.1|	687019	687870	-	851	gene1728	-	-	ENOG4105FW8	S	-	hypothetical protein [Bacillus pumilus]
gene173	7.05843	14.1169	0	0	-Inf	1	1	gi|111111111|ref|scaffold1.1|	159804	160214	-	410	gene173	GO:0080090;GO:0019222;GO:0031326;GO:0031323;GO:0050789;GO:2000112;GO:0060255;GO:0065007;GO:0010468;GO:0019219;GO:0009889;GO:0050794;GO:0051171;GO:2001141;GO:0051252;GO:0006355;GO:0010556;GO:0003700;GO:0097159;GO:0000166;GO:0036094;GO:0005488;GO:1901363;GO:1901265;GO:0001071;GO:0003676;GO:0003677	K03713	ENOG4105KV4	K	sp|P37582|GLNR_BACSU|HTH-type transcriptional regulator GlnR OS=Bacillus subtilis (strain 168) OX=224308 GN=glnR PE=1 SV=1	MerR family transcriptional regulator [Bacillus zhangzhouensis] KEP25328.1 MerR family transcriptional regulator [Bacillus zhangzhouensis]
gene1730	0.0125669	0.0251339	0	0	-Inf	1	1	gi|111111112|ref|scaffold2.1|	688185	688388	-	203	gene1730	-	-	-	-	-	XRE family transcriptional regulator [Streptococcus pneumoniae]
gene1731	0.28904	0.578079	0	0	-Inf	1	1	gi|111111112|ref|scaffold2.1|	688559	688987	+	428	gene1731	-	-	-	-	-	XRE family transcriptional regulator [Bacillus safensis] APJ12042.1 transcriptional regulator [Bacillus safensis]
gene1732	0.666048	1.3321	0	0	-Inf	1	1	gi|111111112|ref|scaffold2.1|	689367	690470	-	1103	gene1732	-	-	-	-	-	Uncharacterised protein [Streptococcus pneumoniae]
gene1733	0.230394	0.460788	0	0	-Inf	1	1	gi|111111112|ref|scaffold2.1|	691031	692362	-	1331	gene1733	GO:0044699;GO:0051179;GO:0009987;GO:0006810;GO:0044765;GO:0044763;GO:0051234;GO:0055085;GO:0006842;GO:0006820;GO:0071702;GO:0015849;GO:0006811;GO:0015711;GO:0034220;GO:0015746;GO:0046942;GO:0035674;GO:0005342;GO:0008509;GO:0022857;GO:0015142;GO:0005215;GO:0046943;GO:0022891;GO:0022892;GO:0008514;GO:0015137;GO:0015075;GO:0016020;GO:0016021;GO:0044425;GO:0031224	K03300	ENOG4105D4T	C	sp|O05407|YRAO_BACSU|Uncharacterized transporter YraO OS=Bacillus subtilis (strain 168) OX=224308 GN=yraO PE=3 SV=1	hypothetical protein B4133_2745 [Bacillus pumilus]
gene1734	0.444032	0.888064	0	0	-Inf	1	1	gi|111111112|ref|scaffold2.1|	692503	693363	-	860	gene1734	GO:0032774;GO:0019222;GO:0031326;GO:0031323;GO:0090304;GO:0044249;GO:0034641;GO:0006807;GO:0034645;GO:1901362;GO:0050789;GO:1901360;GO:0080090;GO:0006139;GO:0044260;GO:0071704;GO:2000112;GO:0060255;GO:0010467;GO:0065007;GO:0010468;GO:0018130;GO:1901576;GO:0019219;GO:0006725;GO:0009987;GO:0009889;GO:0050794;GO:0009058;GO:0009059;GO:0051171;GO:0008152;GO:2001141;GO:0034654;GO:0046483;GO:0016070;GO:…	-	ENOG4108KAM	K	sp|O07906|YRAN_BACSU|Uncharacterized HTH-type transcriptional regulator YraN OS=Bacillus subtilis (strain 168) OX=224308 GN=yraN PE=4 SV=1	LysR family transcriptional regulator [Bacillus altitudinis] KWZ65393.1 LysR family transcriptional regulator [Bacillus altitudinis]
gene1735	0.774961	1.54992	0	0	-Inf	1	1	gi|111111112|ref|scaffold2.1|	693499	694629	+	1130	gene1735	GO:0008152;GO:0003824;GO:0016853;GO:0050100;GO:0016863;GO:0016860	-	ENOG4105C7F	S	sp|O07931|YRAM_BACSU|Putative isomerase YraM OS=Bacillus subtilis (strain 168) OX=224308 GN=yraM PE=3 SV=2	3-methylitaconate isomerase [Bacillus pumilus] AKC66906.1 3-methylitaconate isomerase [Bacillus pumilus]
gene1736	9.13198	18.264	0	0	-Inf	1	1	gi|111111112|ref|scaffold2.1|	694771	695544	-	773	gene1736	GO:0044267;GO:0044260;GO:0071704;GO:0009987;GO:0006464;GO:0043412;GO:0036211;GO:0008152;GO:0044238;GO:0019538;GO:0044237;GO:0043170;GO:0080090;GO:0019222;GO:0031326;GO:0031323;GO:0050789;GO:2000112;GO:0060255;GO:0065007;GO:0010468;GO:0019219;GO:0009889;GO:0050794;GO:0051171;GO:2001141;GO:0051252;GO:0006355;GO:0010556;GO:0016879;GO:0003824;GO:0004077;GO:0016874;GO:0018271;GO:0003700;GO:0001071;GO:…	K03524	ENOG4107V2V	H	sp|P29906|BIRA_PARDE|Biotin--[acetyl-CoA-carboxylase] ligase OS=Paracoccus denitrificans OX=266 GN=birA PE=3 SV=1	BirA family transcriptional regulator, biotin operon repressor / biotin-[acetyl-CoA-carboxylase] ligase [Bacillus sp. RRD69]
gene1737	1.10589	2.21178	0	0	-Inf	1	1	gi|111111112|ref|scaffold2.1|	695559	696017	-	458	gene1737	GO:0008152;GO:0003824;GO:0016787	K07107	ENOG4105MVB	S	sp|P11469|YSMA_BACSU|Uncharacterized protein YsmA OS=Bacillus subtilis (strain 168) OX=224308 GN=ysmA PE=4 SV=1	hypothetical protein [Bacillus sp. M 2-6] EIL84177.1 thioesterase [Bacillus sp. M 2-6]
gene1738	95.6805	191.361	0	0	-Inf	1	1	gi|111111112|ref|scaffold2.1|	696140	696904	-	764	gene1738	GO:0008152;GO:0044710;GO:0055114;GO:0006091;GO:0009987;GO:0044237;GO:0015980;GO:0045333;GO:0009060;GO:0044238;GO:0006099;GO:0016491;GO:0051536;GO:0051540;GO:0005488;GO:0009055;GO:0003824;GO:0000104;GO:0016627;GO:0051537;GO:0016635;GO:0008177	K00240	ENOG4105E33	C	sp|P08066|SDHB_BACSU|Succinate dehydrogenase iron-sulfur subunit OS=Bacillus subtilis (strain 168) OX=224308 GN=sdhB PE=3 SV=3	succinate dehydrogenase iron-sulfur subunit [Bacillus stratosphericus LAMA 585]
gene1739	127.877	255.754	0	0	-Inf	1	1	gi|111111112|ref|scaffold2.1|	696906	698666	-	1760	gene1739	GO:0008152;GO:0044710;GO:0055114;GO:0009987;GO:0044237;GO:0006091;GO:0022900;GO:0045333;GO:0015980;GO:0044238;GO:0006099;GO:0009060;GO:0009061;GO:0016491;GO:0003824;GO:0016627;GO:0005488;GO:0000166;GO:1901363;GO:1901265;GO:0043168;GO:0050662;GO:0043167;GO:0036094;GO:0048037;GO:0097159;GO:0050660;GO:0000104;GO:0008177;GO:0016635	K00239	ENOG4105C00	C	sp|P08065|SDHA_BACSU|Succinate dehydrogenase flavoprotein subunit OS=Bacillus subtilis (strain 168) OX=224308 GN=sdhA PE=3 SV=4	succinate dehydrogenase flavoprotein subunit [Bacillus sp. FJAT-21955] KQL40571.1 succinate dehydrogenase [Bacillus sp. FJAT-21955]
gene174	3.59833	7.19667	0	0	-Inf	1	1	gi|111111111|ref|scaffold1.1|	160306	161586	-	1280	gene174	GO:0008152;GO:0003824;GO:0043168;GO:0043167;GO:0048037;GO:0005488;GO:0030170;GO:0016829	-	ENOG4105CXI	P	sp|P94479|YNBB_BACSU|Uncharacterized protein YnbB OS=Bacillus subtilis (strain 168) OX=224308 GN=ynbB PE=4 SV=2	hypothetical protein [Bacillus pumilus] BAT48788.1 aluminum resistance protein [Bacillus pumilus] APP17039.1 hypothetical protein BS467_15395 [Bacillus pumilus]
gene1740	1.79707	3.59414	0	0	-Inf	1	1	gi|111111112|ref|scaffold2.1|	698704	699312	-	608	gene1740	GO:0044710;GO:0008152;GO:0055114;GO:0016627;GO:0003824;GO:0016491;GO:0000104	K00241	ENOG4108NU2	C	sp|P08064|DHSC_BACSU|Succinate dehydrogenase cytochrome b558 subunit OS=Bacillus subtilis (strain 168) OX=224308 GN=sdhC PE=1 SV=2	succinate dehydrogenase [Bacillus altitudinis] KWZ65399.1 succinate dehydrogenase [Bacillus altitudinis]
gene1741	0.938332	1.87666	0	0	-Inf	1	1	gi|111111112|ref|scaffold2.1|	699596	700039	+	443	gene1741	-	-	ENOG4105VC3	S	sp|P42955|YSLB_BACSU|Uncharacterized protein YslB OS=Bacillus subtilis (strain 168) OX=224308 GN=yslB PE=1 SV=1	protein yslb [Bacillus stratosphericus LAMA 585]
[truncated: 2,669 more rows]
